# Supplementary material for: Antiviral and Cytotoxic Activity of Different Plant Parts of Banana (Musa spp.)
Source: MDPI journal article supplement (doi:10.3390/v12050549), 2020-05-15
Supplement: s1 [file s1]

# Antiviral and Cytotoxic Activity of Different Plant Parts of Banana (*Musa* spp.)

Sujogya Kumar Panda <sup>1,2,\*</sup>, Ana Hortência Fonsêca Castro <sup>1,3</sup>, Ramin Saleh Jouneghani <sup>1</sup>,  
Pieter Leyssen <sup>4</sup>, Johan Neyts <sup>4</sup>, Rony Swennen <sup>5,6,7</sup> and Walter Luyten <sup>1</sup>

- <sup>1</sup> Department of Biology, Katholieke Universiteit Leuven, 3000 Leuven, Belgium;  
acastro905@gmail.com (A.H.F.C.); r.saleh.j@gmail.com (R.S.J.); walter.luyten@kuleuven.be (W.L.)
- <sup>2</sup> Mayurbhanj Biological Research (MBR), Bhanjpur, Baripada 757002, Odisha, India
- <sup>3</sup> Plant Physiology and Biochemistry, Universidade Federal de São João Del-Rei, Av. Sebastião  
Gonçalves Coelho, 400—Chanandour, Divinópolis MG 35501-296, Brazil
- <sup>4</sup> Rega Institute for Medical Research, Laboratory of Virology and Chemotherapy, Katholieke  
Universiteit Leuven, 3000 Leuven, Belgium; pieter.leyssen@kuleuven.be (P.L.);  
johan.neyts@kuleuven.be (J.N.)
- <sup>5</sup> International Institute of Tropical Agriculture, Arusha P.O. Box 447, Tanzania;  
rony.swennen@kuleuven.be
- <sup>6</sup> Laboratory of Tropical Crop Improvement, Division of Crop Biotechnics, Katholieke Universiteit  
Leuven, 3001 Leuven, Belgium
- <sup>7</sup> Bioversity International, 3001 Leuven, Belgium
- \* Correspondence: sujogya.panda@kuleuven.be; Tel.: +32-16-373467

## Supplementary material I

Figure S1: Antiviral activity of extracts against enterovirus. Extracts (primary code) tested mentioned under the header compounds in each panel. EC<sub>50</sub> = 50% Effective Concentration (concentration at which 50% inhibition of virus replication is observed); EC<sub>90</sub> = 90% Effective Concentration (concentration at which 90% inhibition of virus replication is observed); CC<sub>50</sub> = 50% Cytostatic/Cytotoxic Concentration (concentration at which 50% adverse effect is observed on RD cells in parallel with antiviral assay); SI = Selectivity Index (CC<sub>50</sub>/EC<sub>50</sub>); SS = Selectivity Surface (integrated surface delineated by the EC<sub>50</sub> curve, the CC<sub>50</sub> curve and the 50% horizontal); TI = Therapeutic Index (SS × 10logSI); AV-Antiviral; AM-Antimetabolic.

| Compound       | Virus       |      |        | Cell | AV Method  |             | AM Method  |             |
|----------------|-------------|------|--------|------|------------|-------------|------------|-------------|
| Primary code   | Species     | Type | Strain | Type | Method     | Type        | Method     | Type        |
| BAVARI E1_0001 | Enterovirus | 71   | BRCR   | RD   | Absorbance | MTS - 498nm | Microscopy | Tox scoring |

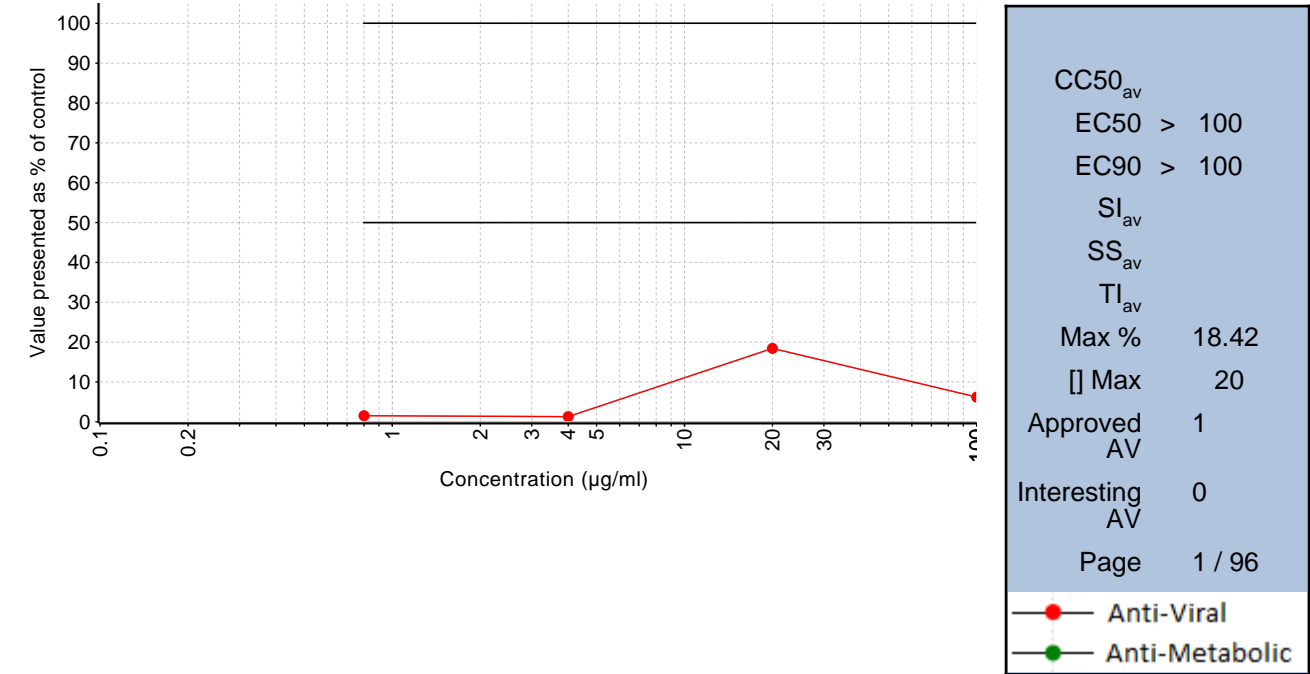

[Export chart data to CSV](#)

| Summary values |      |       |       |
|----------------|------|-------|-------|
| Statistic      | CC50 | EC50  | EC90  |
| Median         |      | > 100 | > 100 |
| Med.Abs.Dev.   |      |       |       |
| Mean           |      | > 100 | > 100 |
| Stdev.         |      |       |       |

| Compound       | Virus       |      |        | Cell | AV Method  |             | AM Method  |             |
|----------------|-------------|------|--------|------|------------|-------------|------------|-------------|
| Primary code   | Species     | Type | Strain | Type | Method     | Type        | Method     | Type        |
| BAVARI E1_0002 | Enterovirus | 71   | BRCR   | RD   | Absorbance | MTS - 498nm | Microscopy | Tox scoring |

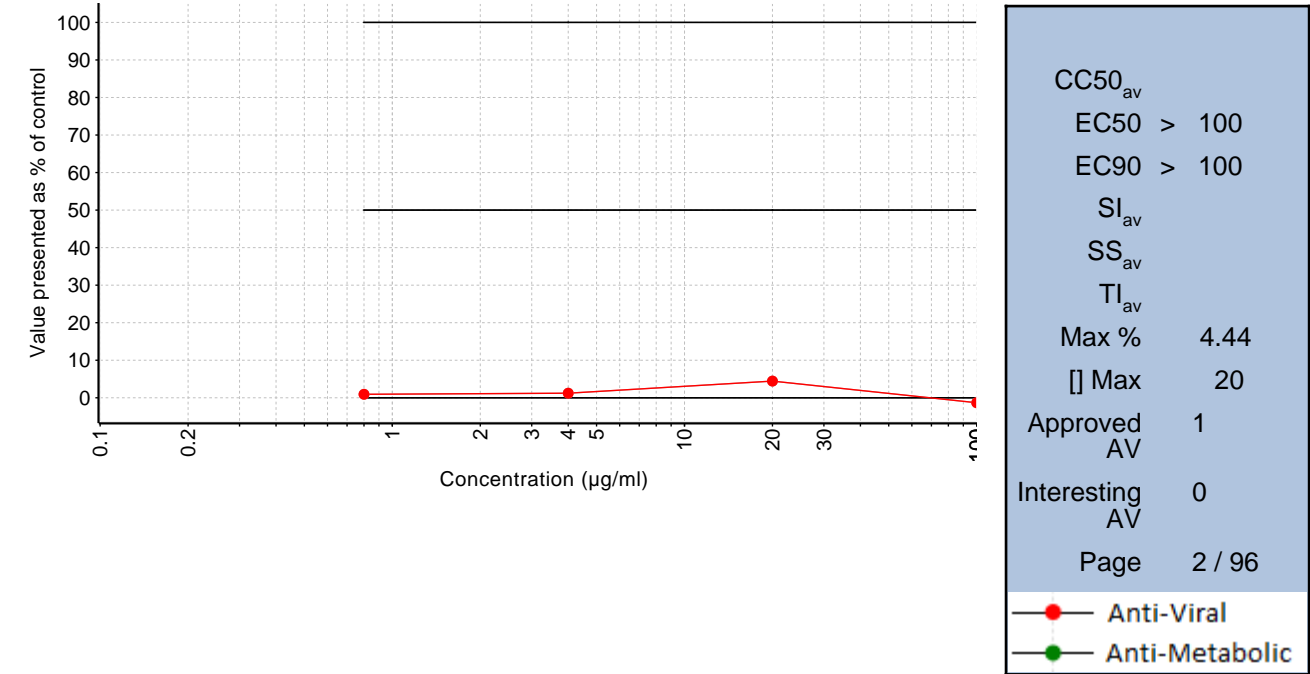

[Export chart data to CSV](#)

| Summary values |      |       |       |
|----------------|------|-------|-------|
| Statistic      | CC50 | EC50  | EC90  |
| Median         |      | > 100 | > 100 |
| Med.Abs.Dev.   |      |       |       |
| Mean           |      | > 100 | > 100 |
| Stdev.         |      |       |       |

| Compound       | Virus       |      |        | Cell | AV Method  |             | AM Method  |             |
|----------------|-------------|------|--------|------|------------|-------------|------------|-------------|
| Primary code   | Species     | Type | Strain | Type | Method     | Type        | Method     | Type        |
| BAVARI E1_0003 | Enterovirus | 71   | BRCR   | RD   | Absorbance | MTS - 498nm | Microscopy | Tox scoring |

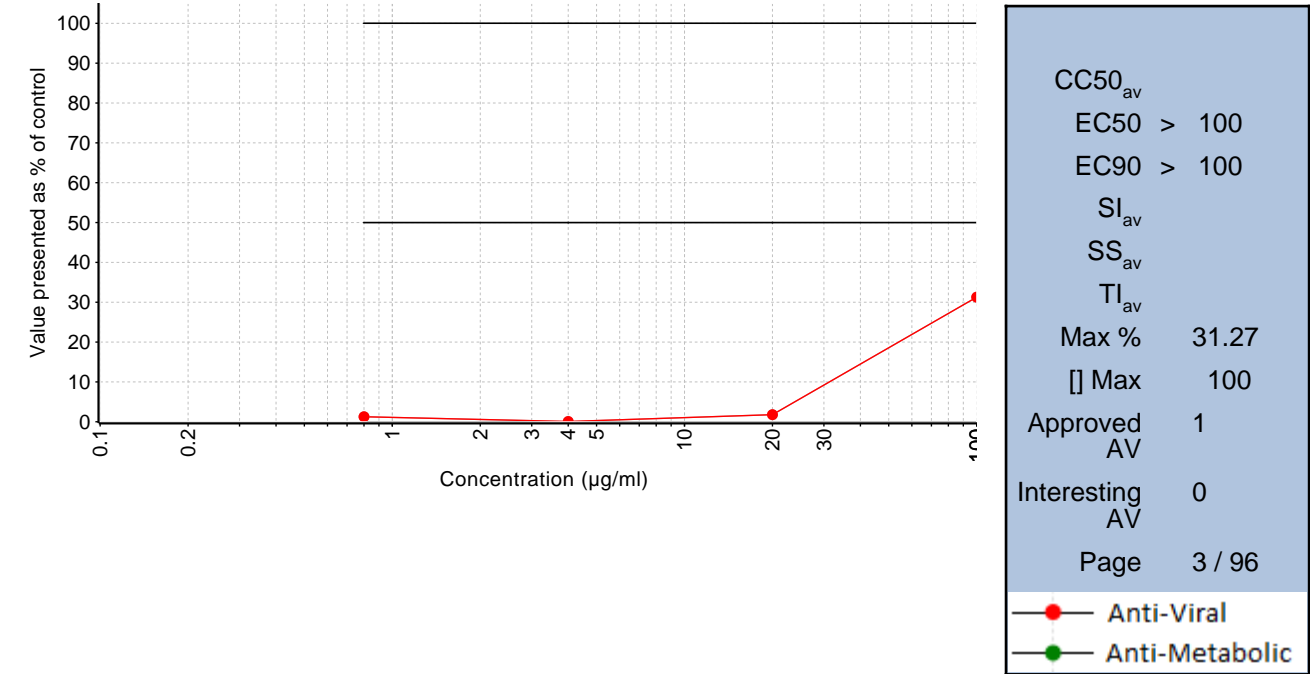

[Export chart data to CSV](#)

| Summary values |      |       |       |
|----------------|------|-------|-------|
| Statistic      | CC50 | EC50  | EC90  |
| Median         |      | > 100 | > 100 |
| Med.Abs.Dev.   |      |       |       |
| Mean           |      | > 100 | > 100 |
| Stdev.         |      |       |       |

| Compound       | Virus       |      |        | Cell | AV Method  |             | AM Method  |             |
|----------------|-------------|------|--------|------|------------|-------------|------------|-------------|
| Primary code   | Species     | Type | Strain | Type | Method     | Type        | Method     | Type        |
| BAVARI E1_0004 | Enterovirus | 71   | BRCR   | RD   | Absorbance | MTS - 498nm | Microscopy | Tox scoring |

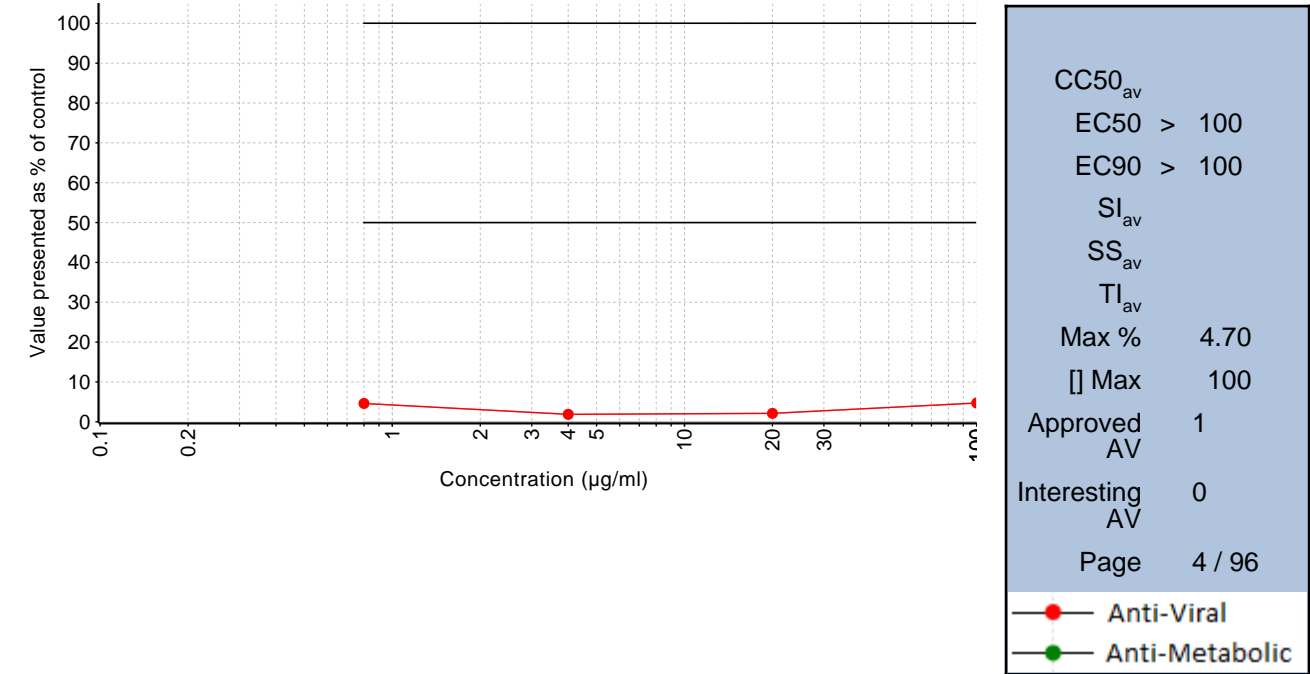

[Export chart data to CSV](#)

| Summary values |      |       |       |
|----------------|------|-------|-------|
| Statistic      | CC50 | EC50  | EC90  |
| Median         |      | > 100 | > 100 |
| Med.Abs.Dev.   |      |       |       |
| Mean           |      | > 100 | > 100 |
| Stdev.         |      |       |       |

| Compound       | Virus       |      |        | Cell | AV Method  |             | AM Method  |             |
|----------------|-------------|------|--------|------|------------|-------------|------------|-------------|
| Primary code   | Species     | Type | Strain | Type | Method     | Type        | Method     | Type        |
| BAVARI E1_0005 | Enterovirus | 71   | BRCR   | RD   | Absorbance | MTS - 498nm | Microscopy | Tox scoring |

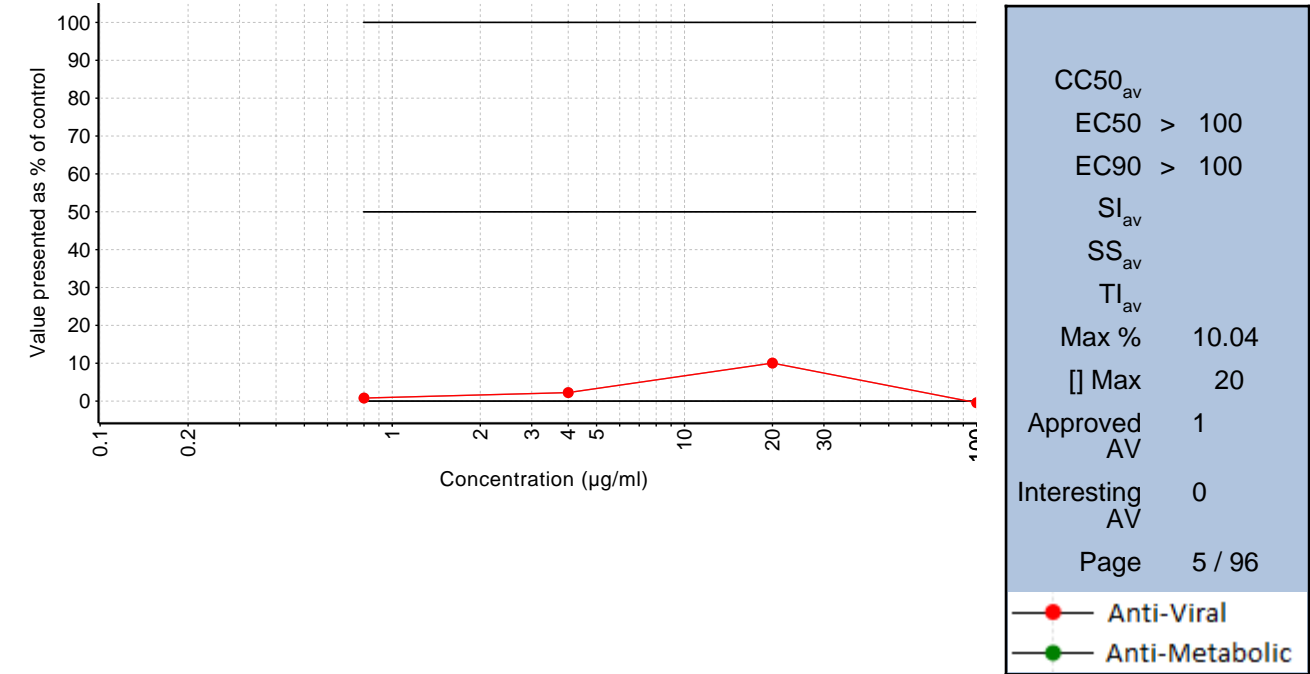

[Export chart data to CSV](#)

| Summary values |      |       |       |
|----------------|------|-------|-------|
| Statistic      | CC50 | EC50  | EC90  |
| Median         |      | > 100 | > 100 |
| Med.Abs.Dev.   |      |       |       |
| Mean           |      | > 100 | > 100 |
| Stdev.         |      |       |       |

| Compound       | Virus       |      |        | Cell | AV Method  |             | AM Method  |             |
|----------------|-------------|------|--------|------|------------|-------------|------------|-------------|
| Primary code   | Species     | Type | Strain | Type | Method     | Type        | Method     | Type        |
| BAVARI E1_0006 | Enterovirus | 71   | BRCR   | RD   | Absorbance | MTS - 498nm | Microscopy | Tox scoring |

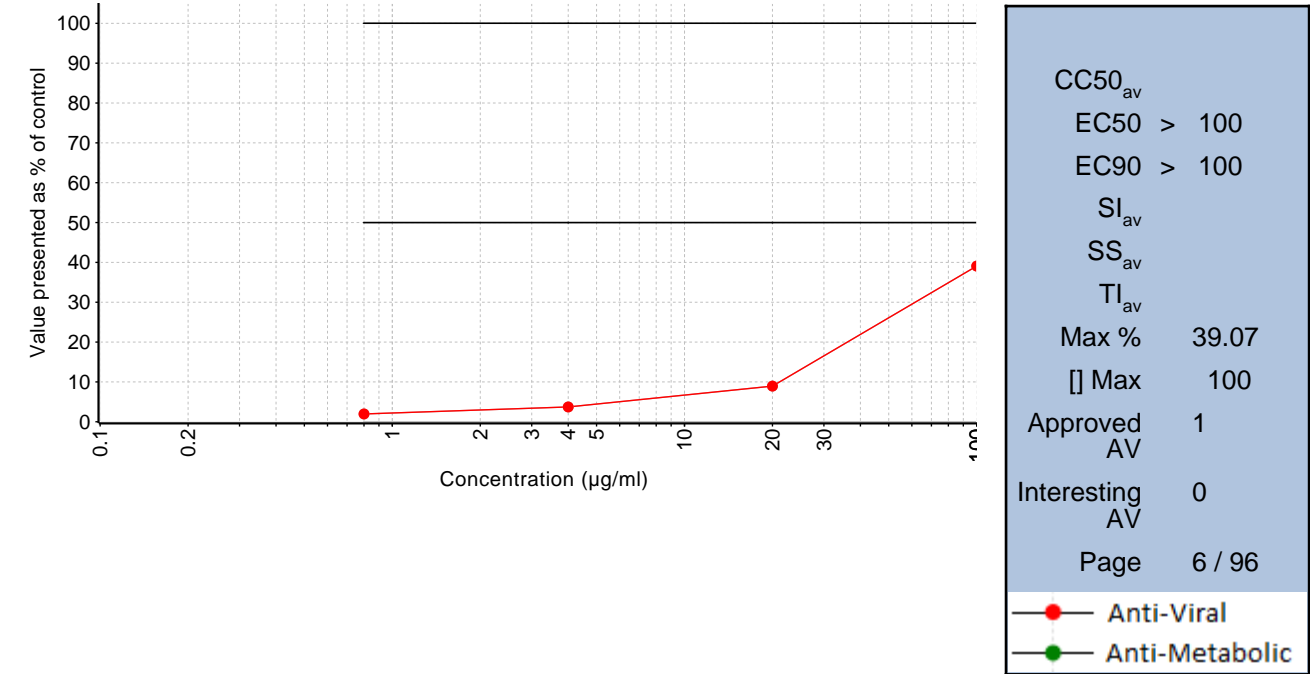

[Export chart data to CSV](#)

| Summary values |      |       |       |
|----------------|------|-------|-------|
| Statistic      | CC50 | EC50  | EC90  |
| Median         |      | > 100 | > 100 |
| Med.Abs.Dev.   |      |       |       |
| Mean           |      | > 100 | > 100 |
| Stdev.         |      |       |       |

| Compound       | Virus       |      |        | Cell | AV Method  |             | AM Method  |             |
|----------------|-------------|------|--------|------|------------|-------------|------------|-------------|
| Primary code   | Species     | Type | Strain | Type | Method     | Type        | Method     | Type        |
| BAVARI E1_0007 | Enterovirus | 71   | BRCR   | RD   | Absorbance | MTS - 498nm | Microscopy | Tox scoring |

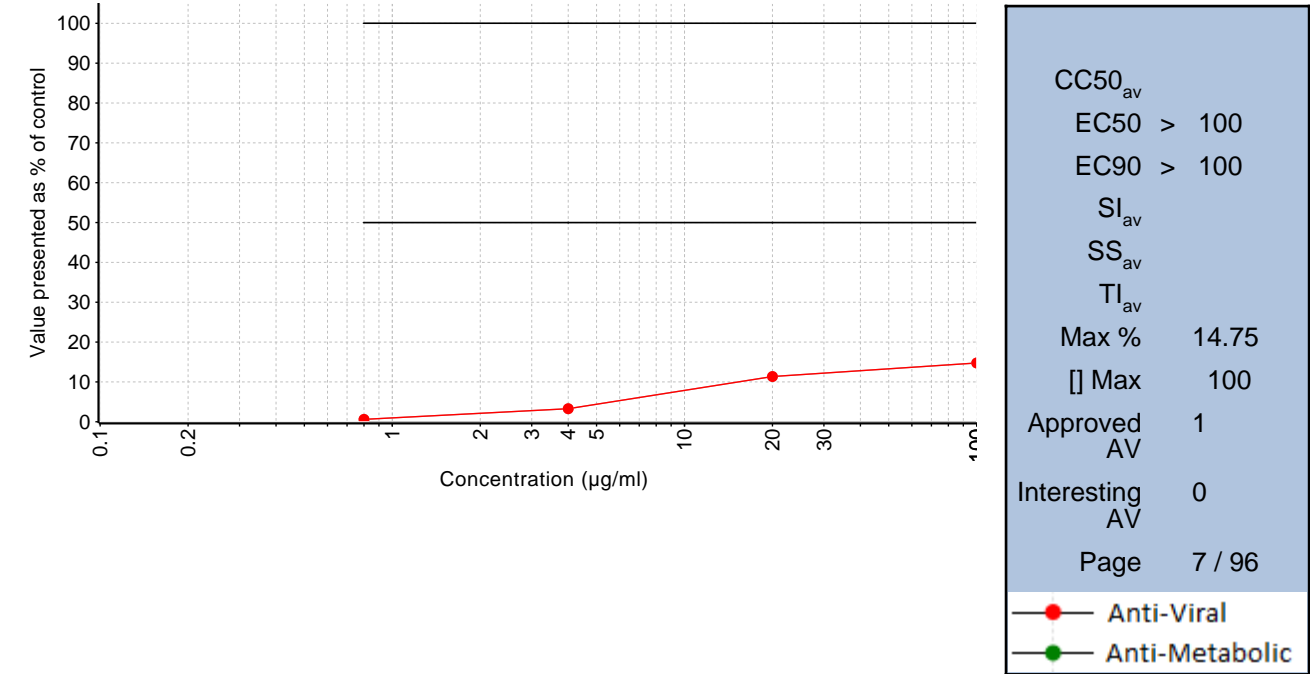

[Export chart data to CSV](#)

| Summary values |      |       |       |
|----------------|------|-------|-------|
| Statistic      | CC50 | EC50  | EC90  |
| Median         |      | > 100 | > 100 |
| Med.Abs.Dev.   |      |       |       |
| Mean           |      | > 100 | > 100 |
| Stdev.         |      |       |       |



| Compound       | Virus       |      |        | Cell | AV Method  |             | AM Method  |             |
|----------------|-------------|------|--------|------|------------|-------------|------------|-------------|
| Primary code   | Species     | Type | Strain | Type | Method     | Type        | Method     | Type        |
| BAVARI E1_0008 | Enterovirus | 71   | BRCR   | RD   | Absorbance | MTS - 498nm | Microscopy | Tox scoring |

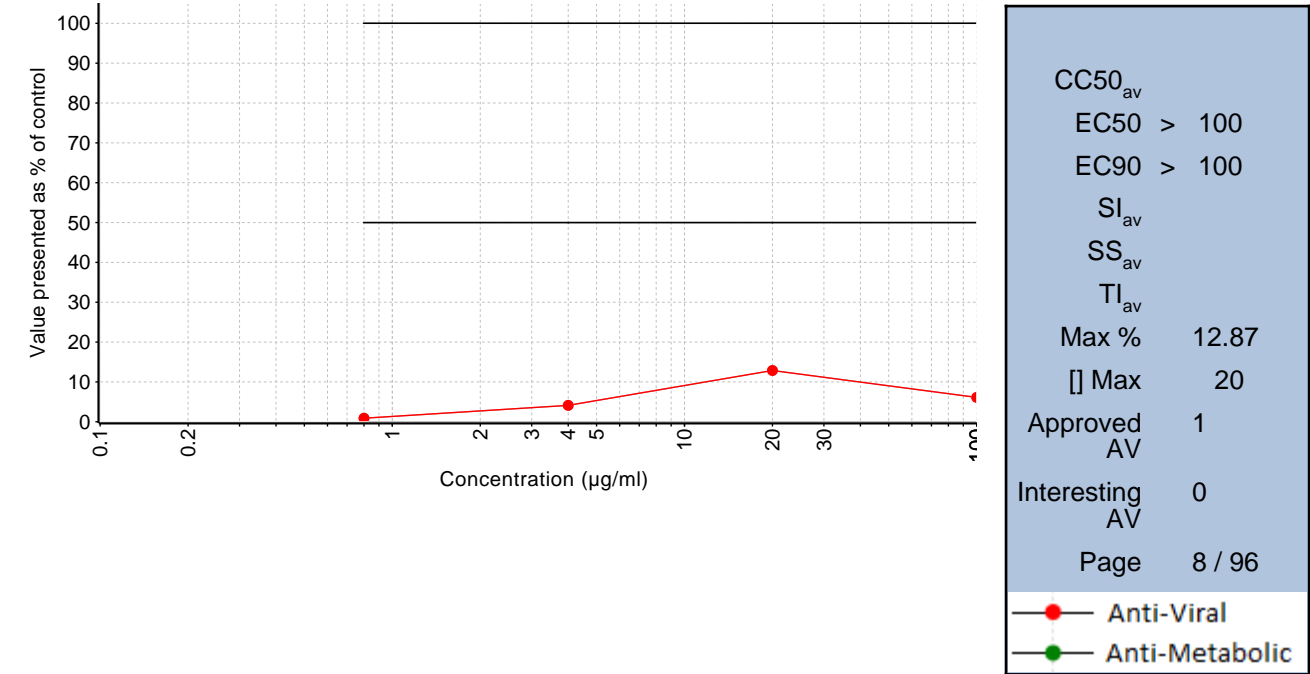

[Export chart data to CSV](#)

| Summary values |      |       |       |
|----------------|------|-------|-------|
| Statistic      | CC50 | EC50  | EC90  |
| Median         |      | > 100 | > 100 |
| Med.Abs.Dev.   |      |       |       |
| Mean           |      | > 100 | > 100 |
| Stdev.         |      |       |       |

| Compound       | Virus       |      |        | Cell | AV Method  |             | AM Method  |             |
|----------------|-------------|------|--------|------|------------|-------------|------------|-------------|
| Primary code   | Species     | Type | Strain | Type | Method     | Type        | Method     | Type        |
| BAVARI E1_0009 | Enterovirus | 71   | BRCR   | RD   | Absorbance | MTS - 498nm | Microscopy | Tox scoring |

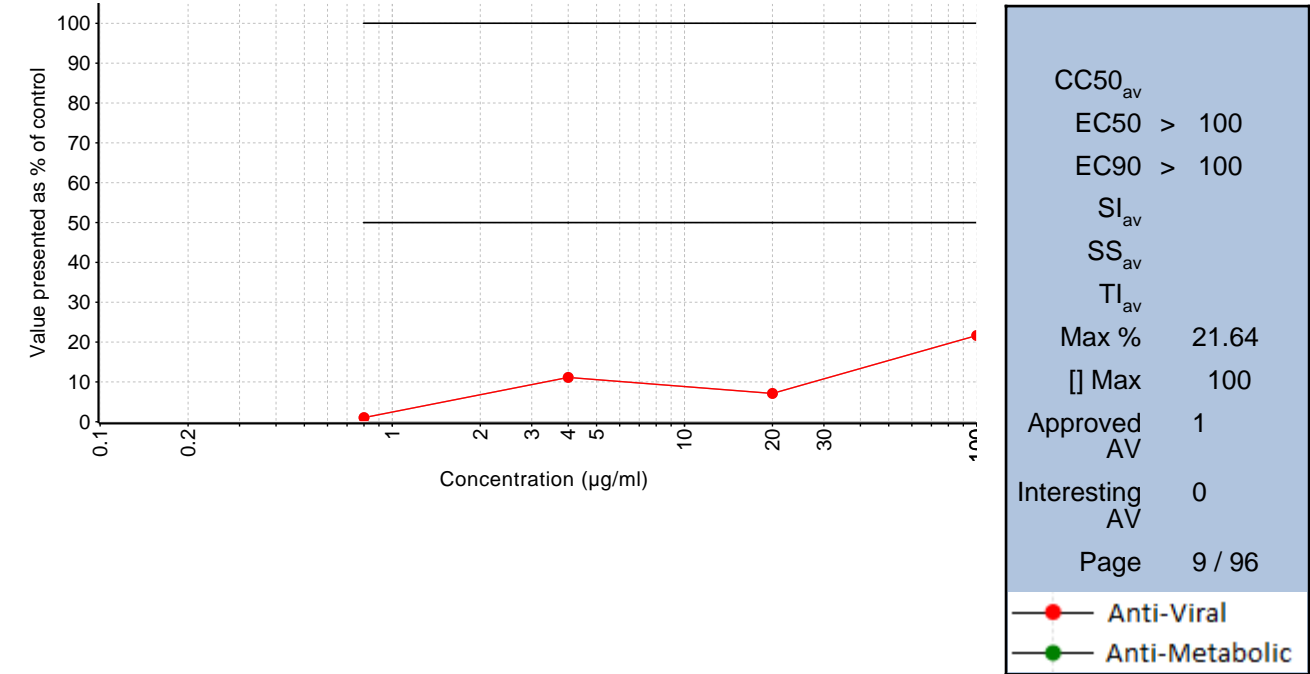

[Export chart data to CSV](#)

| Summary values |      |       |       |
|----------------|------|-------|-------|
| Statistic      | CC50 | EC50  | EC90  |
| Median         |      | > 100 | > 100 |
| Med.Abs.Dev.   |      |       |       |
| Mean           |      | > 100 | > 100 |
| Stdev.         |      |       |       |

| Compound       | Virus       |      |        | Cell | AV Method  |             | AM Method  |             |
|----------------|-------------|------|--------|------|------------|-------------|------------|-------------|
| Primary code   | Species     | Type | Strain | Type | Method     | Type        | Method     | Type        |
| BAVARI E1_0010 | Enterovirus | 71   | BRCR   | RD   | Absorbance | MTS - 498nm | Microscopy | Tox scoring |

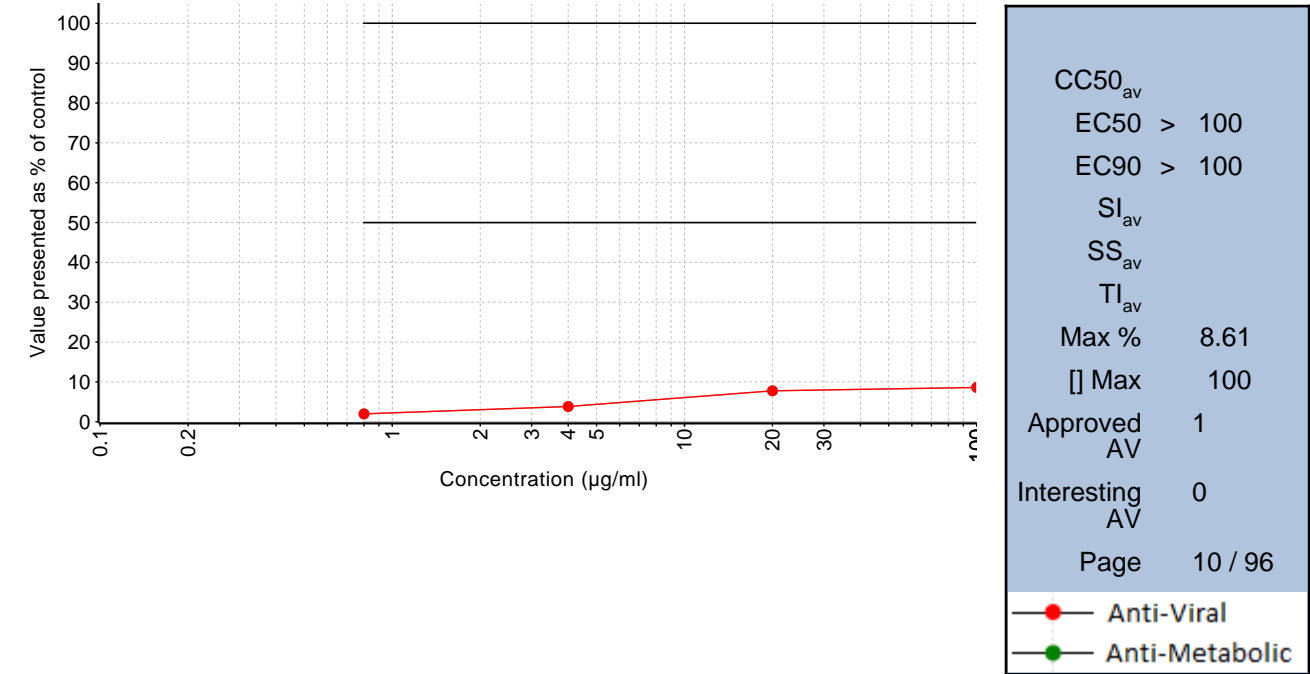

[Export chart data to CSV](#)

| Summary values |      |       |       |
|----------------|------|-------|-------|
| Statistic      | CC50 | EC50  | EC90  |
| Median         |      | > 100 | > 100 |
| Med.Abs.Dev.   |      |       |       |
| Mean           |      | > 100 | > 100 |
| Stdev.         |      |       |       |

| Compound       | Virus       |      |        | Cell | AV Method  |             | AM Method  |             |
|----------------|-------------|------|--------|------|------------|-------------|------------|-------------|
| Primary code   | Species     | Type | Strain | Type | Method     | Type        | Method     | Type        |
| BAVARI E1_0011 | Enterovirus | 71   | BRCR   | RD   | Absorbance | MTS - 498nm | Microscopy | Tox scoring |

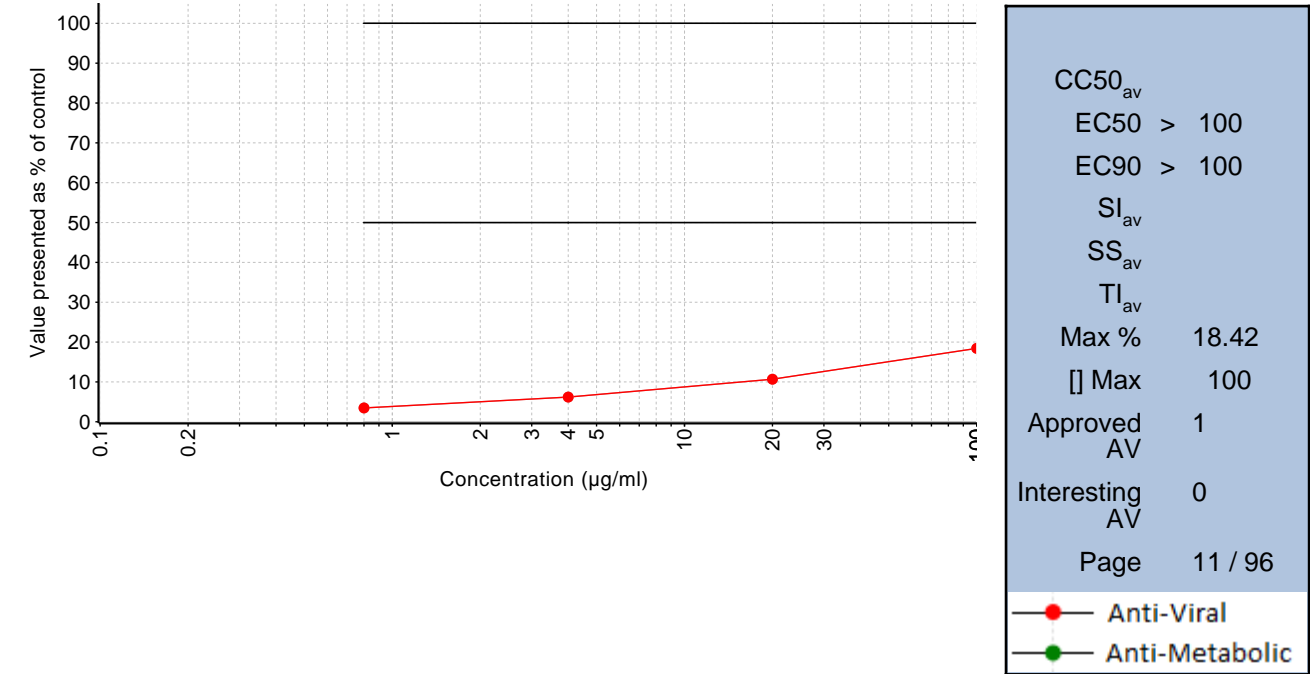

[Export chart data to CSV](#)

| Summary values |      |       |       |
|----------------|------|-------|-------|
| Statistic      | CC50 | EC50  | EC90  |
| Median         |      | > 100 | > 100 |
| Med.Abs.Dev.   |      |       |       |
| Mean           |      | > 100 | > 100 |
| Stdev.         |      |       |       |

| Compound       | Virus       |      |        | Cell | AV Method  |             | AM Method  |             |
|----------------|-------------|------|--------|------|------------|-------------|------------|-------------|
| Primary code   | Species     | Type | Strain | Type | Method     | Type        | Method     | Type        |
| BAVARI E1_0012 | Enterovirus | 71   | BRCR   | RD   | Absorbance | MTS - 498nm | Microscopy | Tox scoring |

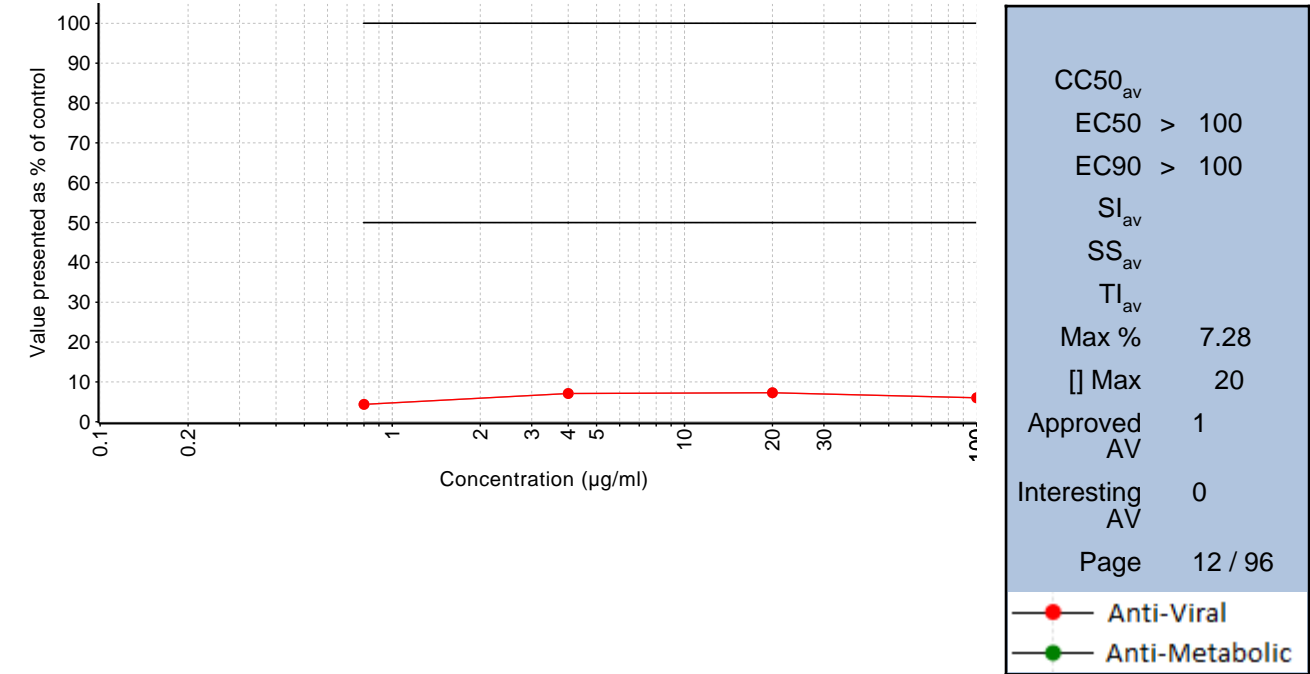

[Export chart data to CSV](#)

| Summary values |      |       |       |
|----------------|------|-------|-------|
| Statistic      | CC50 | EC50  | EC90  |
| Median         |      | > 100 | > 100 |
| Med.Abs.Dev.   |      |       |       |
| Mean           |      | > 100 | > 100 |
| Stdev.         |      |       |       |

| Compound       | Virus       |      |        | Cell | AV Method  |             | AM Method  |             |
|----------------|-------------|------|--------|------|------------|-------------|------------|-------------|
| Primary code   | Species     | Type | Strain | Type | Method     | Type        | Method     | Type        |
| BAVARI E1_0013 | Enterovirus | 71   | BRCR   | RD   | Absorbance | MTS - 498nm | Microscopy | Tox scoring |

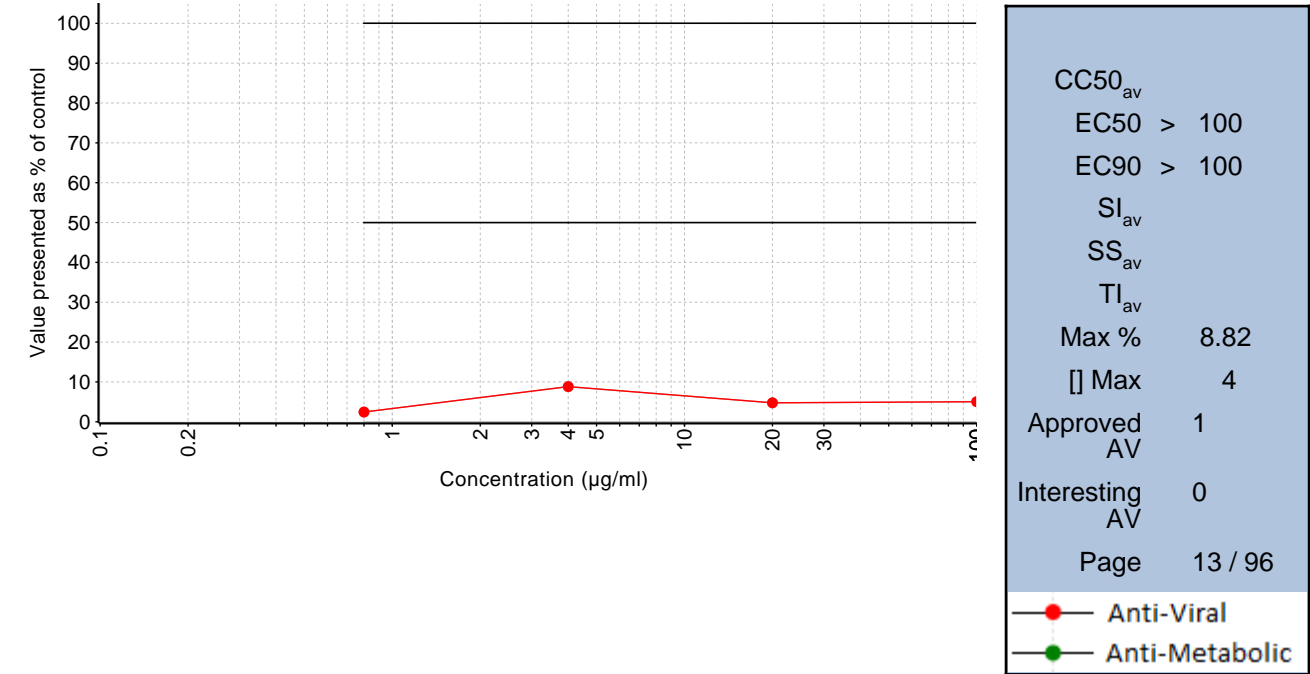

[Export chart data to CSV](#)

| Summary values |      |       |       |
|----------------|------|-------|-------|
| Statistic      | CC50 | EC50  | EC90  |
| Median         |      | > 100 | > 100 |
| Med.Abs.Dev.   |      |       |       |
| Mean           |      | > 100 | > 100 |
| Stdev.         |      |       |       |

| Compound       | Virus       |      |        | Cell | AV Method  |             | AM Method  |             |
|----------------|-------------|------|--------|------|------------|-------------|------------|-------------|
| Primary code   | Species     | Type | Strain | Type | Method     | Type        | Method     | Type        |
| BAVARI E1_0014 | Enterovirus | 71   | BRCR   | RD   | Absorbance | MTS - 498nm | Microscopy | Tox scoring |

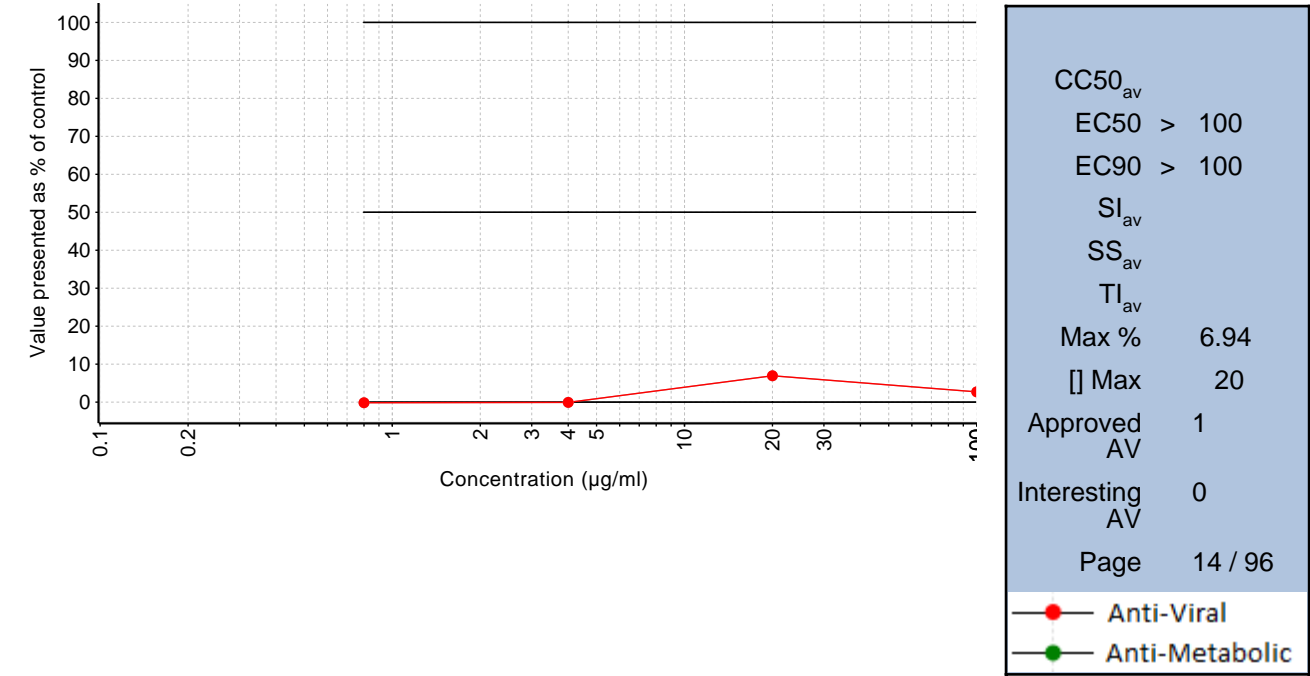

[Export chart data to CSV](#)

| Summary values |      |       |       |
|----------------|------|-------|-------|
| Statistic      | CC50 | EC50  | EC90  |
| Median         |      | > 100 | > 100 |
| Med.Abs.Dev.   |      |       |       |
| Mean           |      | > 100 | > 100 |
| Stdev.         |      |       |       |

| Compound       | Virus       |      |        | Cell | AV Method  |             | AM Method  |             |
|----------------|-------------|------|--------|------|------------|-------------|------------|-------------|
| Primary code   | Species     | Type | Strain | Type | Method     | Type        | Method     | Type        |
| BAVARI E1_0015 | Enterovirus | 71   | BRCR   | RD   | Absorbance | MTS - 498nm | Microscopy | Tox scoring |

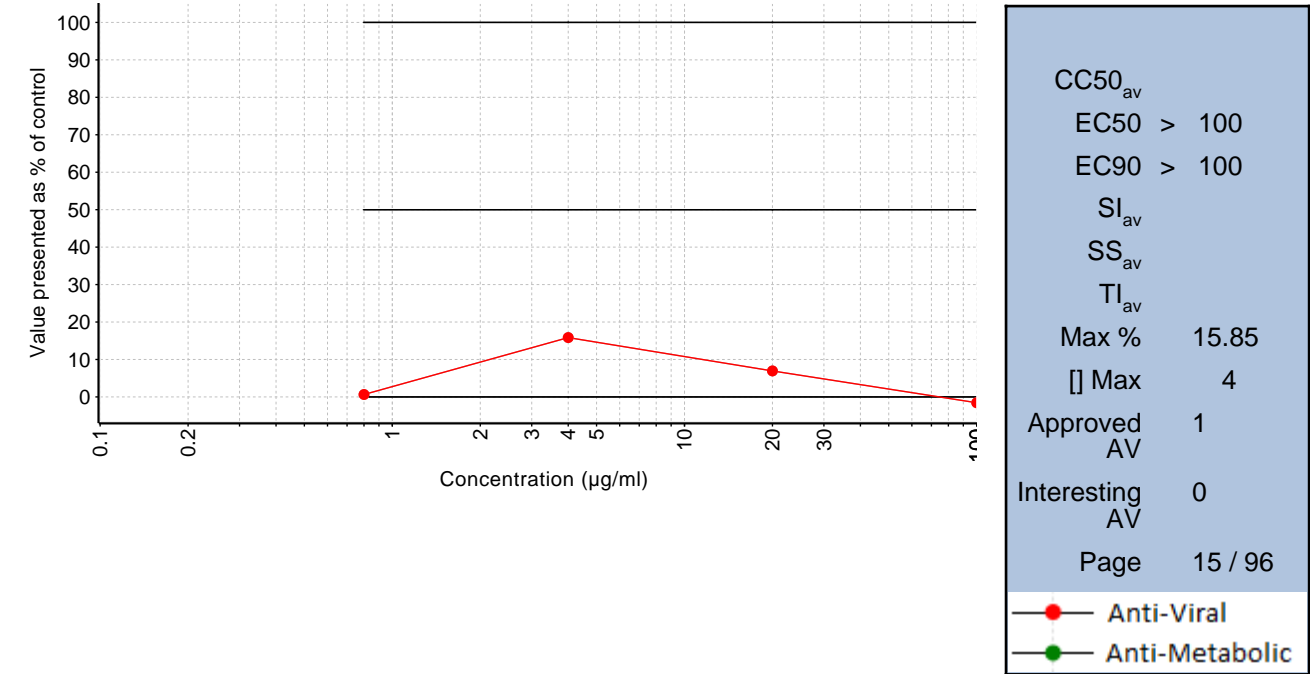

[Export chart data to CSV](#)

| Summary values |      |       |       |
|----------------|------|-------|-------|
| Statistic      | CC50 | EC50  | EC90  |
| Median         |      | > 100 | > 100 |
| Med.Abs.Dev.   |      |       |       |
| Mean           |      | > 100 | > 100 |
| Stdev.         |      |       |       |



| Compound       | Virus       |      |        | Cell | AV Method  |             | AM Method  |             |
|----------------|-------------|------|--------|------|------------|-------------|------------|-------------|
| Primary code   | Species     | Type | Strain | Type | Method     | Type        | Method     | Type        |
| BAVARI E1_0016 | Enterovirus | 71   | BRCR   | RD   | Absorbance | MTS - 498nm | Microscopy | Tox scoring |

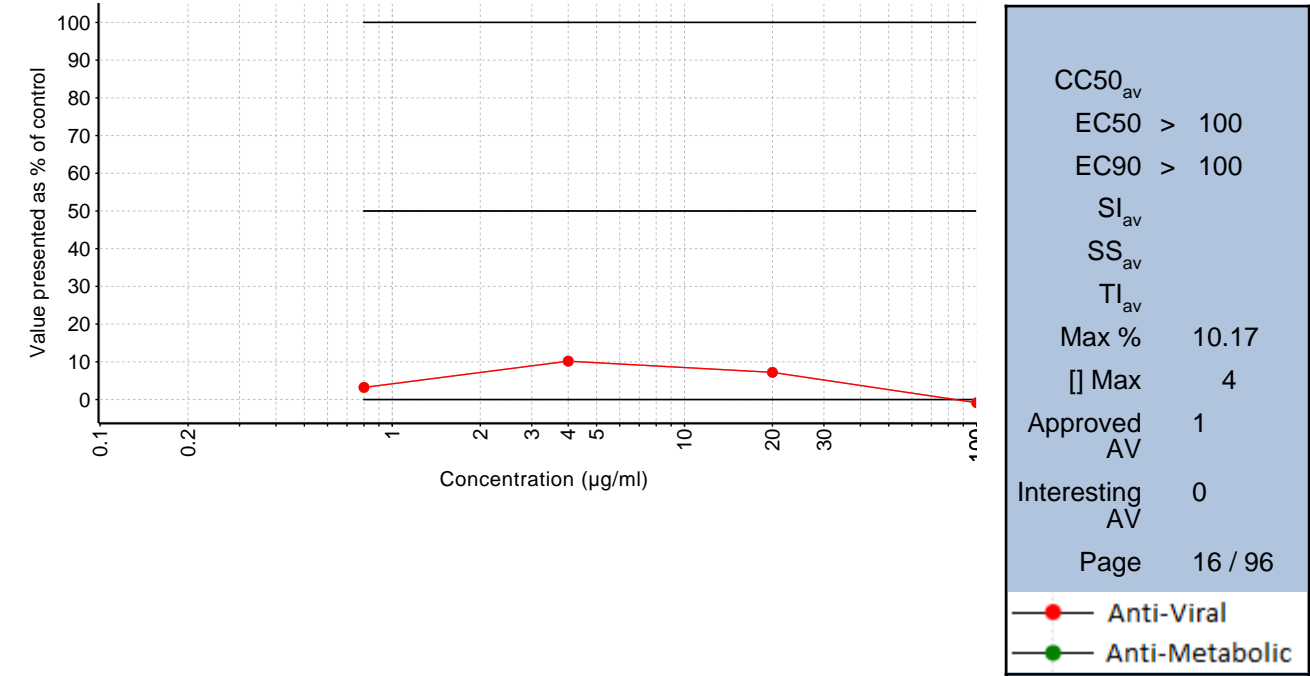

[Export chart data to CSV](#)

| Summary values |      |       |       |
|----------------|------|-------|-------|
| Statistic      | CC50 | EC50  | EC90  |
| Median         |      | > 100 | > 100 |
| Med.Abs.Dev.   |      |       |       |
| Mean           |      | > 100 | > 100 |
| Stdev.         |      |       |       |

| Compound       | Virus       |      |        | Cell | AV Method  |             | AM Method  |             |
|----------------|-------------|------|--------|------|------------|-------------|------------|-------------|
| Primary code   | Species     | Type | Strain | Type | Method     | Type        | Method     | Type        |
| BAVARI E1_0017 | Enterovirus | 71   | BRCR   | RD   | Absorbance | MTS - 498nm | Microscopy | Tox scoring |

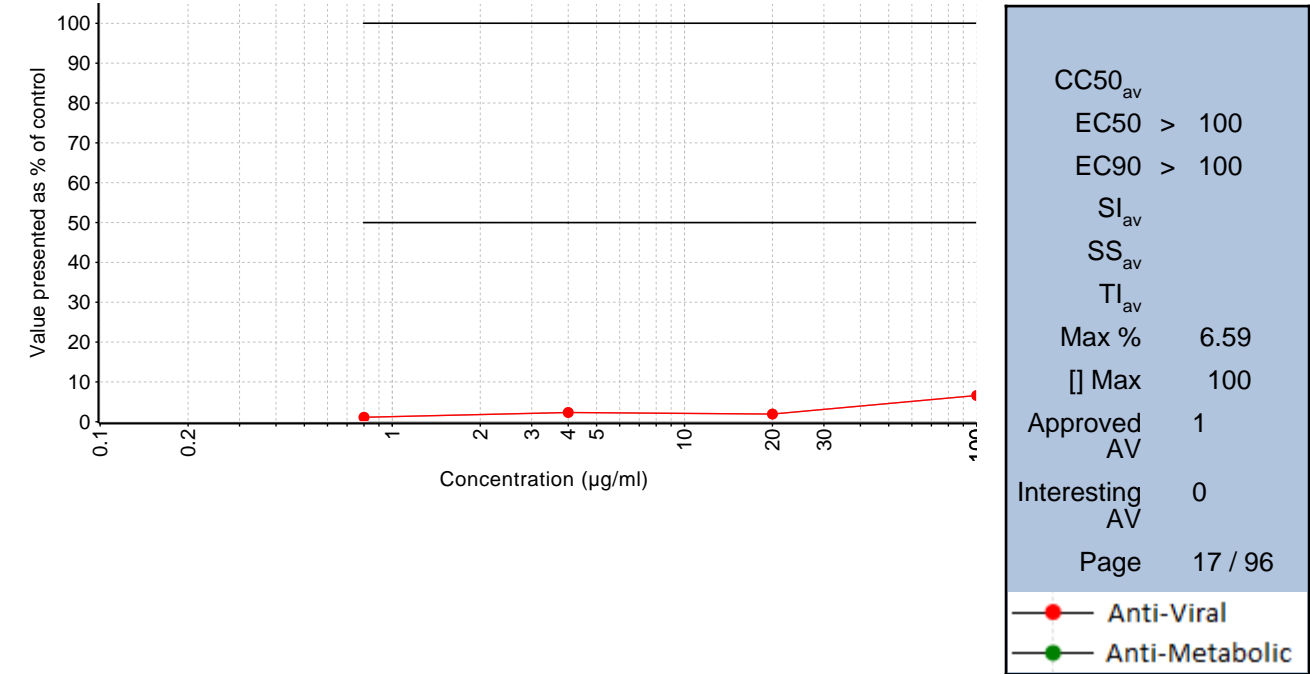

[Export chart data to CSV](#)

| Summary values |      |       |       |
|----------------|------|-------|-------|
| Statistic      | CC50 | EC50  | EC90  |
| Median         |      | > 100 | > 100 |
| Med.Abs.Dev.   |      |       |       |
| Mean           |      | > 100 | > 100 |
| Stdev.         |      |       |       |

| Compound       | Virus       |      |        | Cell | AV Method  |             | AM Method  |             |
|----------------|-------------|------|--------|------|------------|-------------|------------|-------------|
| Primary code   | Species     | Type | Strain | Type | Method     | Type        | Method     | Type        |
| BAVARI E1_0018 | Enterovirus | 71   | BRCR   | RD   | Absorbance | MTS - 498nm | Microscopy | Tox scoring |

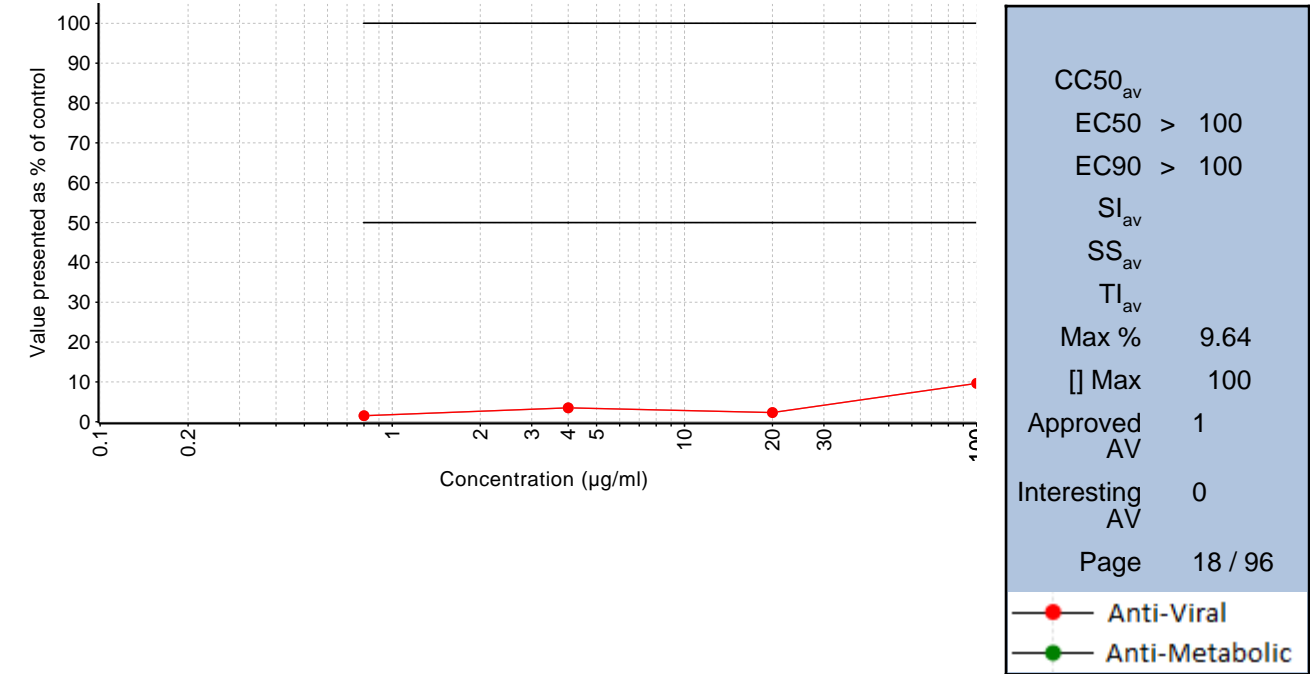

[Export chart data to CSV](#)

| Summary values |      |       |       |
|----------------|------|-------|-------|
| Statistic      | CC50 | EC50  | EC90  |
| Median         |      | > 100 | > 100 |
| Med.Abs.Dev.   |      |       |       |
| Mean           |      | > 100 | > 100 |
| Stdev.         |      |       |       |

| Compound       | Virus       |      |        | Cell | AV Method  |             | AM Method  |             |
|----------------|-------------|------|--------|------|------------|-------------|------------|-------------|
| Primary code   | Species     | Type | Strain | Type | Method     | Type        | Method     | Type        |
| BAVARI E1_0019 | Enterovirus | 71   | BRCR   | RD   | Absorbance | MTS - 498nm | Microscopy | Tox scoring |

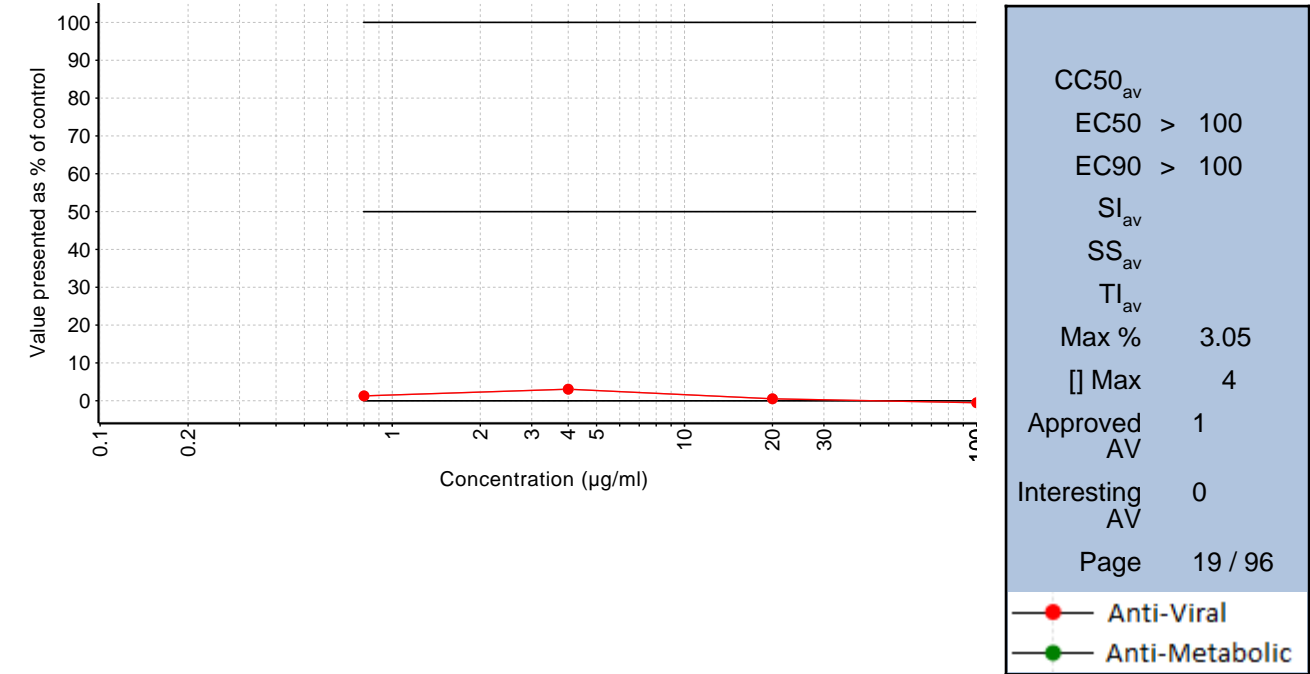

[Export chart data to CSV](#)

| Summary values |      |       |       |
|----------------|------|-------|-------|
| Statistic      | CC50 | EC50  | EC90  |
| Median         |      | > 100 | > 100 |
| Med.Abs.Dev.   |      |       |       |
| Mean           |      | > 100 | > 100 |
| Stdev.         |      |       |       |

| Compound       | Virus       |      |        | Cell | AV Method  |             | AM Method  |             |
|----------------|-------------|------|--------|------|------------|-------------|------------|-------------|
| Primary code   | Species     | Type | Strain | Type | Method     | Type        | Method     | Type        |
| BAVARI E1_0020 | Enterovirus | 71   | BRCR   | RD   | Absorbance | MTS - 498nm | Microscopy | Tox scoring |

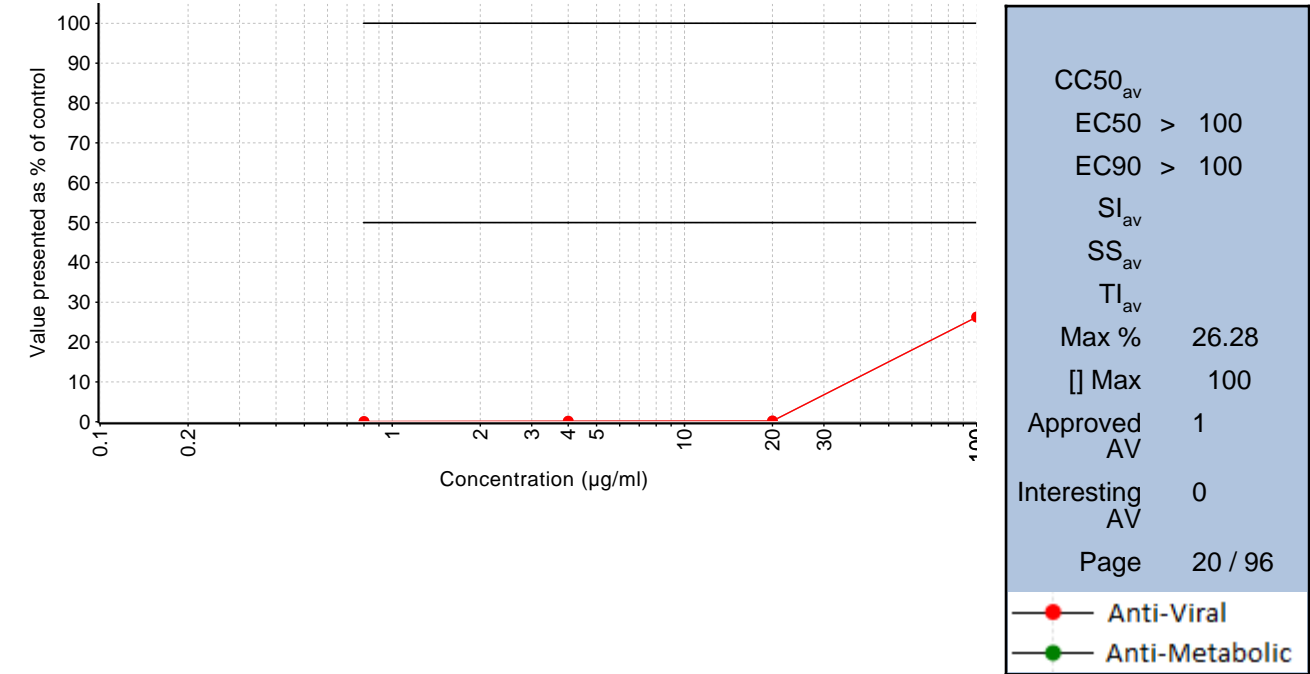

[Export chart data to CSV](#)

| Summary values |      |       |       |
|----------------|------|-------|-------|
| Statistic      | CC50 | EC50  | EC90  |
| Median         |      | > 100 | > 100 |
| Med.Abs.Dev.   |      |       |       |
| Mean           |      | > 100 | > 100 |
| Stdev.         |      |       |       |

| Compound       | Virus       |      |        | Cell | AV Method  |             | AM Method  |             |
|----------------|-------------|------|--------|------|------------|-------------|------------|-------------|
| Primary code   | Species     | Type | Strain | Type | Method     | Type        | Method     | Type        |
| BAVARI E1_0021 | Enterovirus | 71   | BRCR   | RD   | Absorbance | MTS - 498nm | Microscopy | Tox scoring |

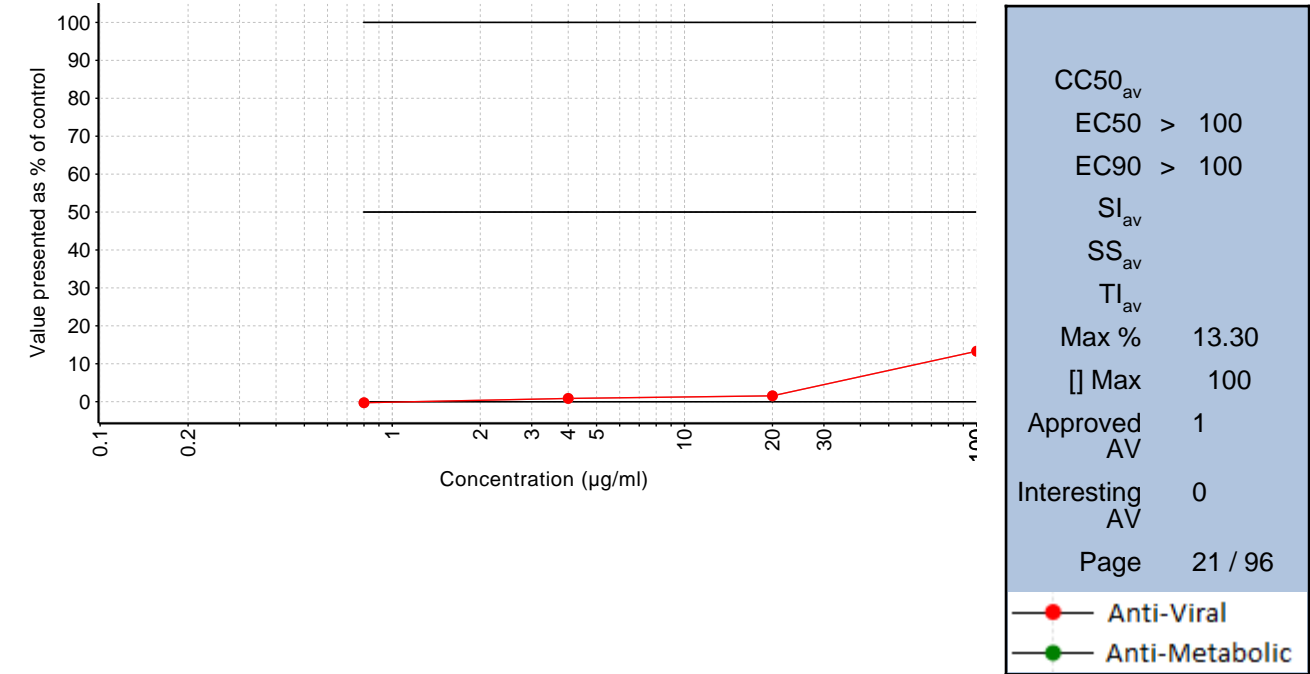

[Export chart data to CSV](#)

| Summary values |      |       |       |
|----------------|------|-------|-------|
| Statistic      | CC50 | EC50  | EC90  |
| Median         |      | > 100 | > 100 |
| Med.Abs.Dev.   |      |       |       |
| Mean           |      | > 100 | > 100 |
| Stdev.         |      |       |       |

| Compound       | Virus       |      |        | Cell | AV Method  |             | AM Method  |             |
|----------------|-------------|------|--------|------|------------|-------------|------------|-------------|
| Primary code   | Species     | Type | Strain | Type | Method     | Type        | Method     | Type        |
| BAVARI E1_0022 | Enterovirus | 71   | BRCR   | RD   | Absorbance | MTS - 498nm | Microscopy | Tox scoring |

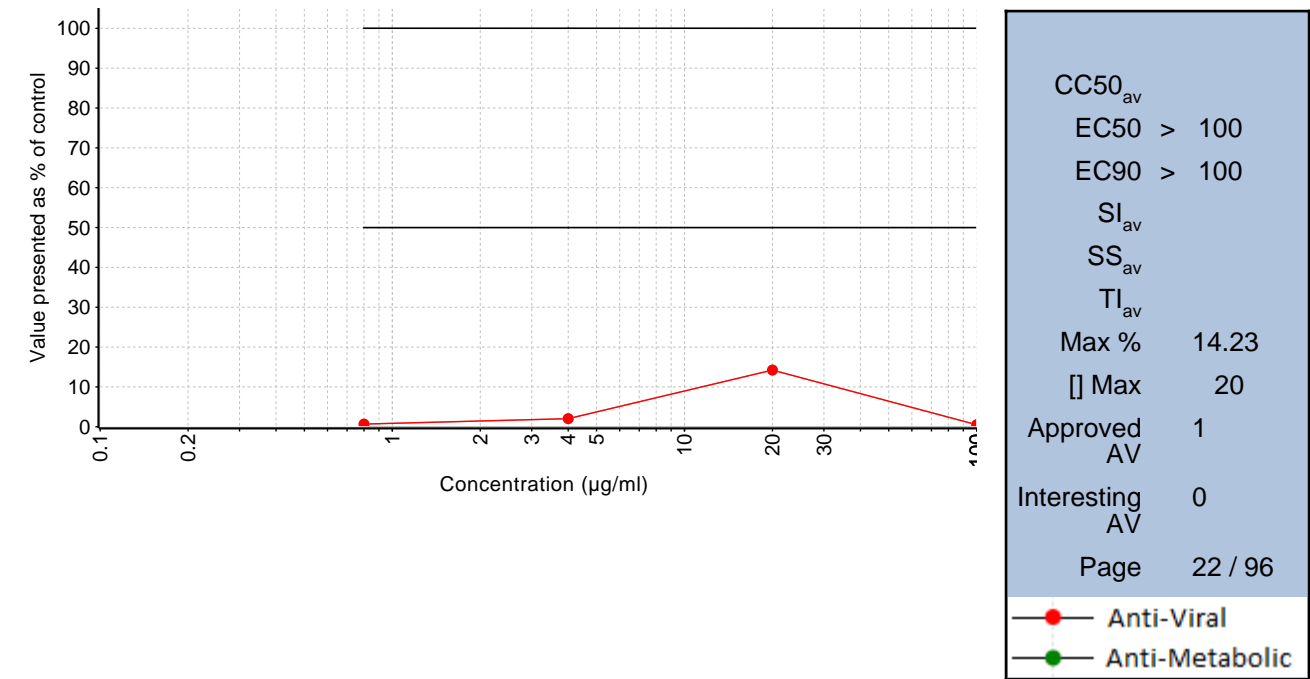

[Export chart data to CSV](#)

| Summary values |      |       |       |
|----------------|------|-------|-------|
| Statistic      | CC50 | EC50  | EC90  |
| Median         |      | > 100 | > 100 |
| Med.Abs.Dev.   |      |       |       |
| Mean           |      | > 100 | > 100 |
| Stdev.         |      |       |       |

| Compound       | Virus       |      |        | Cell | AV Method  |             | AM Method  |             |
|----------------|-------------|------|--------|------|------------|-------------|------------|-------------|
| Primary code   | Species     | Type | Strain | Type | Method     | Type        | Method     | Type        |
| BAVARI E1_0023 | Enterovirus | 71   | BRCR   | RD   | Absorbance | MTS - 498nm | Microscopy | Tox scoring |

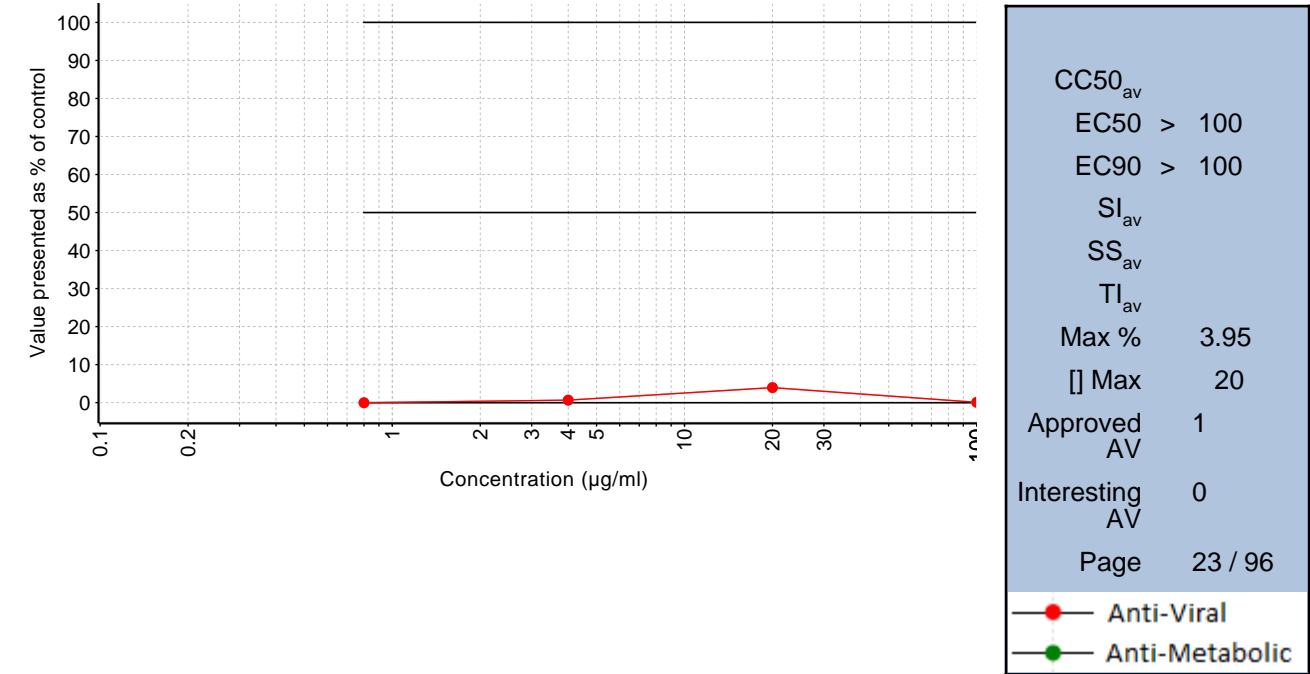

[Export chart data to CSV](#)

| Summary values |      |       |       |
|----------------|------|-------|-------|
| Statistic      | CC50 | EC50  | EC90  |
| Median         |      | > 100 | > 100 |
| Med.Abs.Dev.   |      |       |       |
| Mean           |      | > 100 | > 100 |
| Stdev.         |      |       |       |



| Compound       | Virus       |      |        | Cell | AV Method  |             | AM Method  |             |
|----------------|-------------|------|--------|------|------------|-------------|------------|-------------|
| Primary code   | Species     | Type | Strain | Type | Method     | Type        | Method     | Type        |
| BAVARI E1_0024 | Enterovirus | 71   | BRCR   | RD   | Absorbance | MTS - 498nm | Microscopy | Tox scoring |

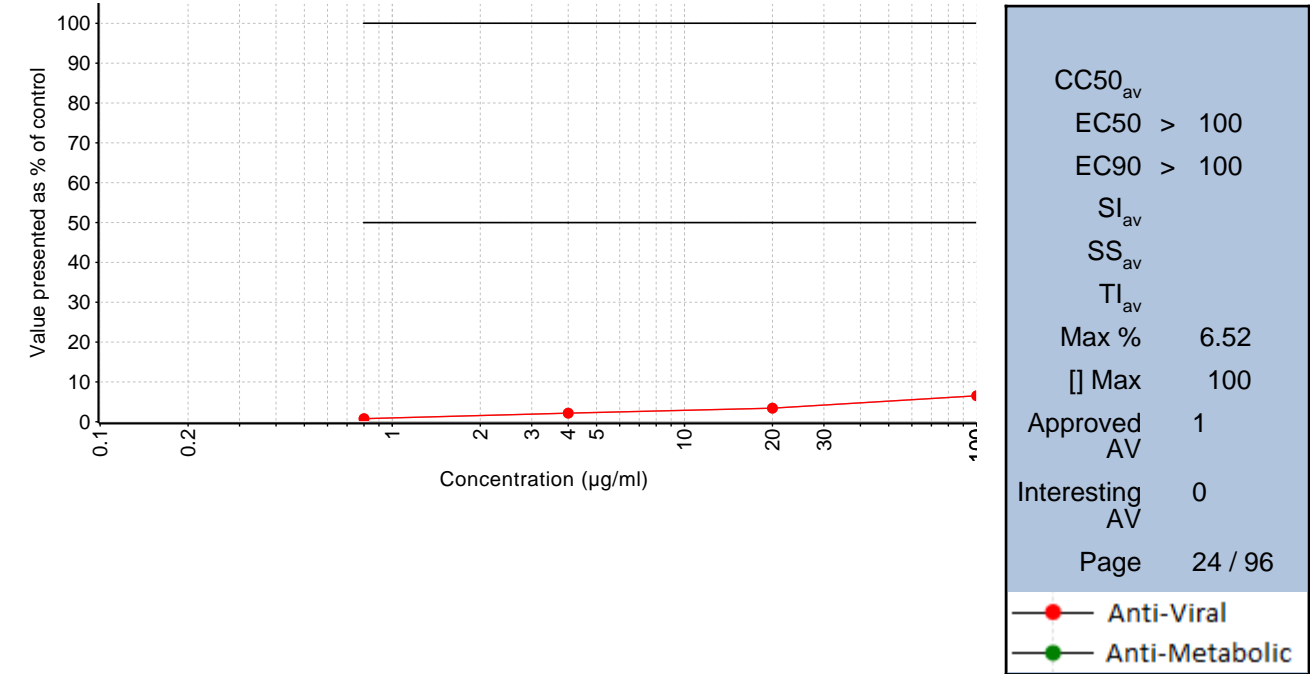

[Export chart data to CSV](#)

| Summary values |      |       |       |
|----------------|------|-------|-------|
| Statistic      | CC50 | EC50  | EC90  |
| Median         |      | > 100 | > 100 |
| Med.Abs.Dev.   |      |       |       |
| Mean           |      | > 100 | > 100 |
| Stdev.         |      |       |       |

| Compound       | Virus       |      |        | Cell | AV Method  |             | AM Method  |             |
|----------------|-------------|------|--------|------|------------|-------------|------------|-------------|
| Primary code   | Species     | Type | Strain | Type | Method     | Type        | Method     | Type        |
| BAVARI E1_0025 | Enterovirus | 71   | BRCR   | RD   | Absorbance | MTS - 498nm | Microscopy | Tox scoring |

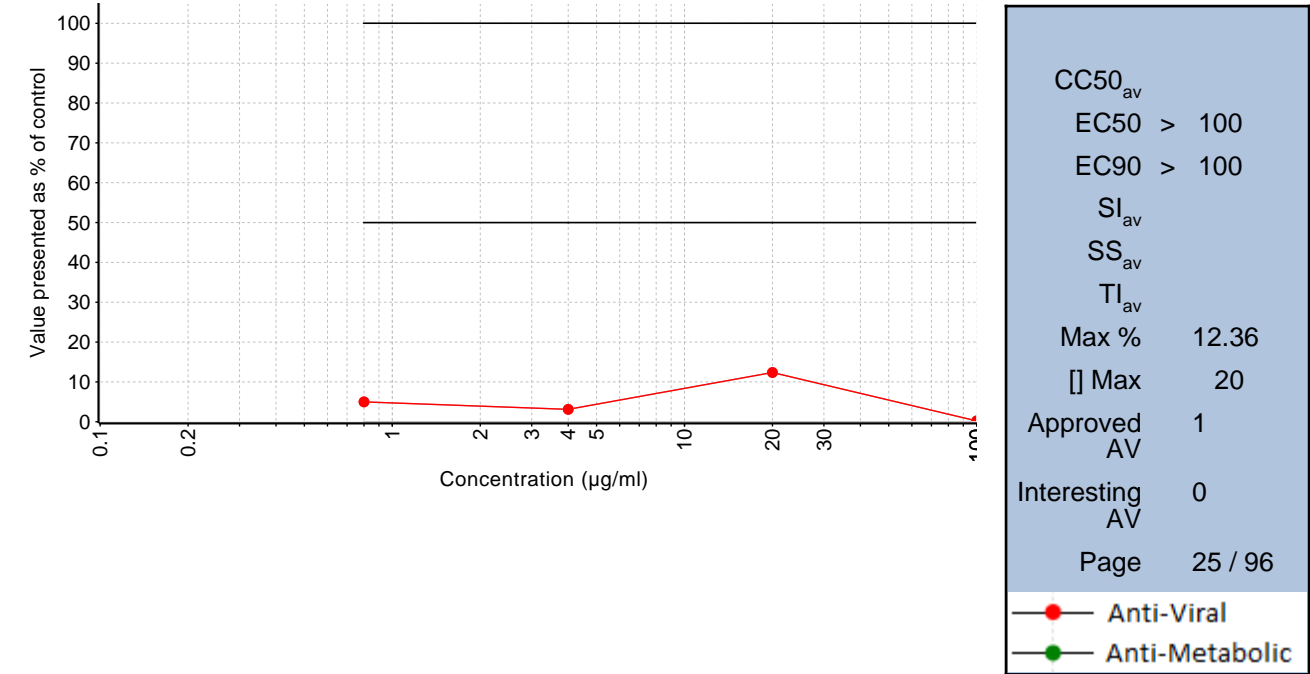

[Export chart data to CSV](#)

| Summary values |      |       |       |
|----------------|------|-------|-------|
| Statistic      | CC50 | EC50  | EC90  |
| Median         |      | > 100 | > 100 |
| Med.Abs.Dev.   |      |       |       |
| Mean           |      | > 100 | > 100 |
| Stdev.         |      |       |       |

| Compound       | Virus       |      |        | Cell | AV Method  |             | AM Method  |             |
|----------------|-------------|------|--------|------|------------|-------------|------------|-------------|
| Primary code   | Species     | Type | Strain | Type | Method     | Type        | Method     | Type        |
| BAVARI E1_0026 | Enterovirus | 71   | BRCR   | RD   | Absorbance | MTS - 498nm | Microscopy | Tox scoring |

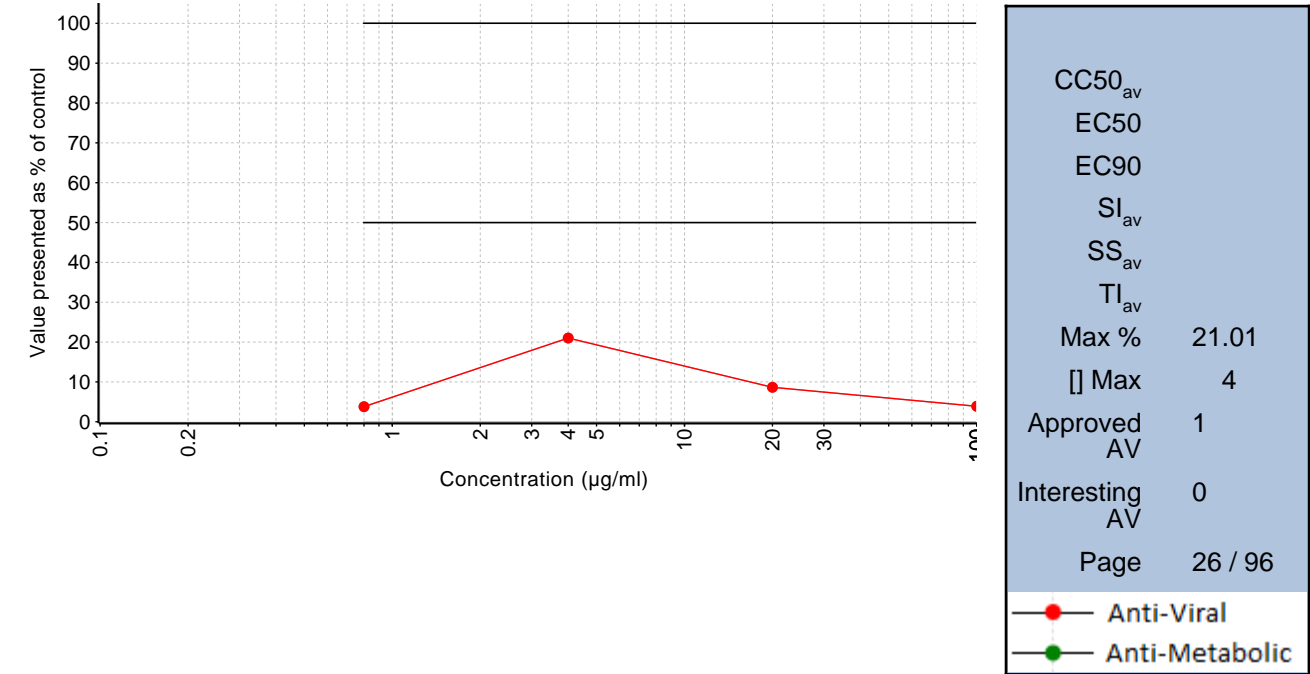

[Export chart data to CSV](#)

| Summary values |      |      |      |
|----------------|------|------|------|
| Statistic      | CC50 | EC50 | EC90 |
| Median         |      |      |      |
| Med.Abs.Dev.   |      |      |      |
| Mean           |      |      |      |
| Stdev.         |      |      |      |

| Compound       | Virus       |      |        | Cell | AV Method  |             | AM Method  |             |
|----------------|-------------|------|--------|------|------------|-------------|------------|-------------|
| Primary code   | Species     | Type | Strain | Type | Method     | Type        | Method     | Type        |
| BAVARI E1_0027 | Enterovirus | 71   | BRCR   | RD   | Absorbance | MTS - 498nm | Microscopy | Tox scoring |

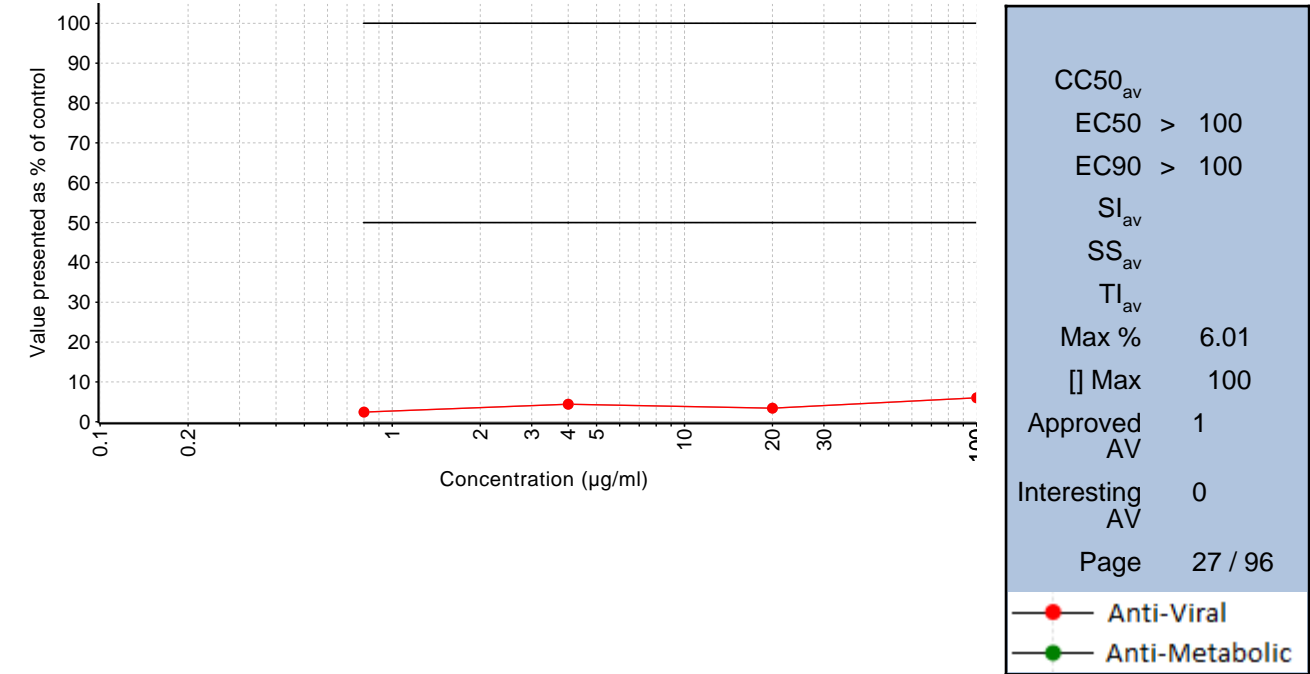

[Export chart data to CSV](#)

| Summary values |      |       |       |
|----------------|------|-------|-------|
| Statistic      | CC50 | EC50  | EC90  |
| Median         |      | > 100 | > 100 |
| Med.Abs.Dev.   |      |       |       |
| Mean           |      | > 100 | > 100 |
| Stdev.         |      |       |       |

| Compound       | Virus       |      |        | Cell | AV Method  |             | AM Method  |             |
|----------------|-------------|------|--------|------|------------|-------------|------------|-------------|
| Primary code   | Species     | Type | Strain | Type | Method     | Type        | Method     | Type        |
| BAVARI E1_0028 | Enterovirus | 71   | BRCR   | RD   | Absorbance | MTS - 498nm | Microscopy | Tox scoring |

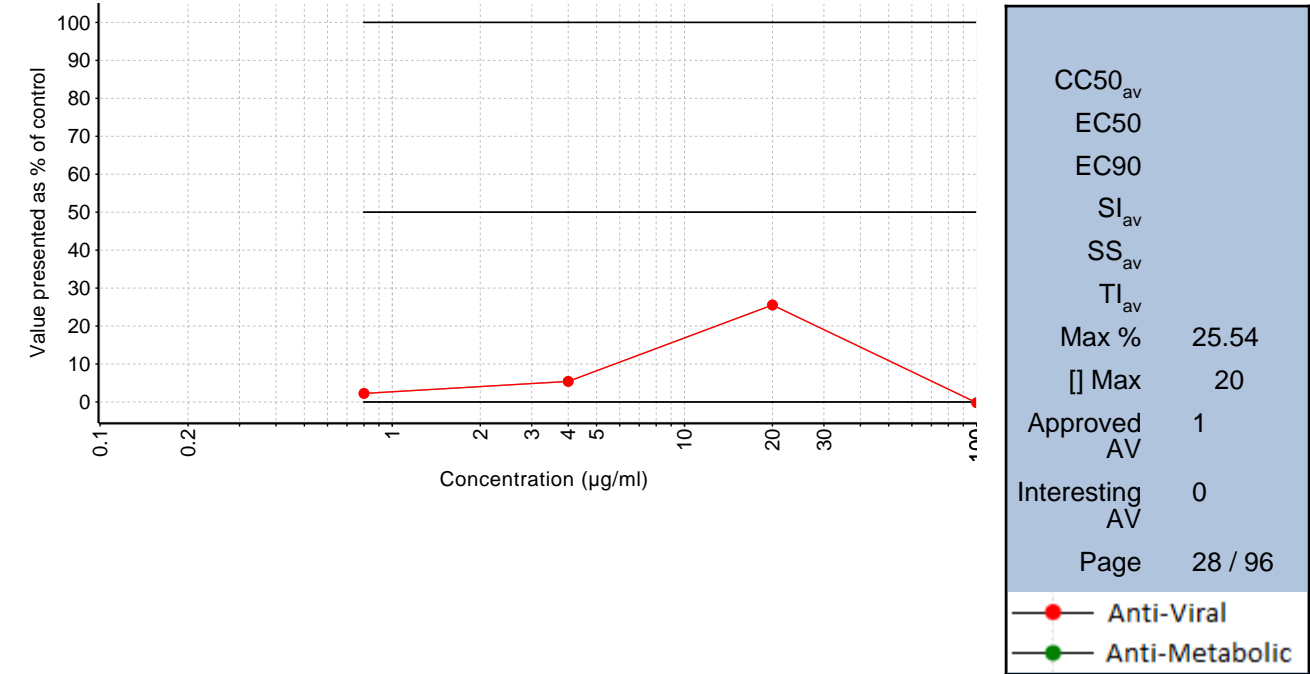

[Export chart data to CSV](#)

| Summary values |      |      |      |
|----------------|------|------|------|
| Statistic      | CC50 | EC50 | EC90 |
| Median         |      |      |      |
| Med.Abs.Dev.   |      |      |      |
| Mean           |      |      |      |
| Stdev.         |      |      |      |

| Compound       | Virus       |      |        | Cell | AV Method  |             | AM Method  |             |
|----------------|-------------|------|--------|------|------------|-------------|------------|-------------|
| Primary code   | Species     | Type | Strain | Type | Method     | Type        | Method     | Type        |
| BAVARI E1_0029 | Enterovirus | 71   | BRCR   | RD   | Absorbance | MTS - 498nm | Microscopy | Tox scoring |

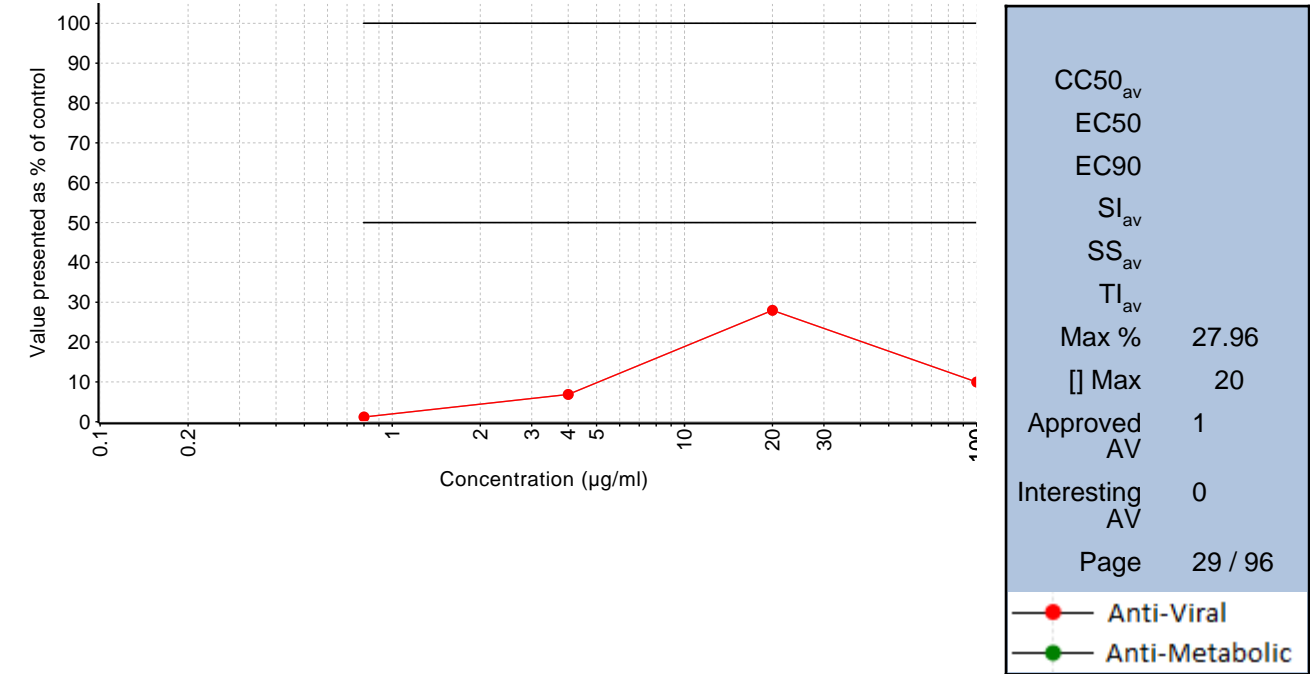

[Export chart data to CSV](#)

| Summary values |      |      |      |
|----------------|------|------|------|
| Statistic      | CC50 | EC50 | EC90 |
| Median         |      |      |      |
| Med.Abs.Dev.   |      |      |      |
| Mean           |      |      |      |
| Stdev.         |      |      |      |

| Compound       | Virus       |      |        | Cell | AV Method  |             | AM Method  |             |
|----------------|-------------|------|--------|------|------------|-------------|------------|-------------|
| Primary code   | Species     | Type | Strain | Type | Method     | Type        | Method     | Type        |
| BAVARI E1_0030 | Enterovirus | 71   | BRCR   | RD   | Absorbance | MTS - 498nm | Microscopy | Tox scoring |

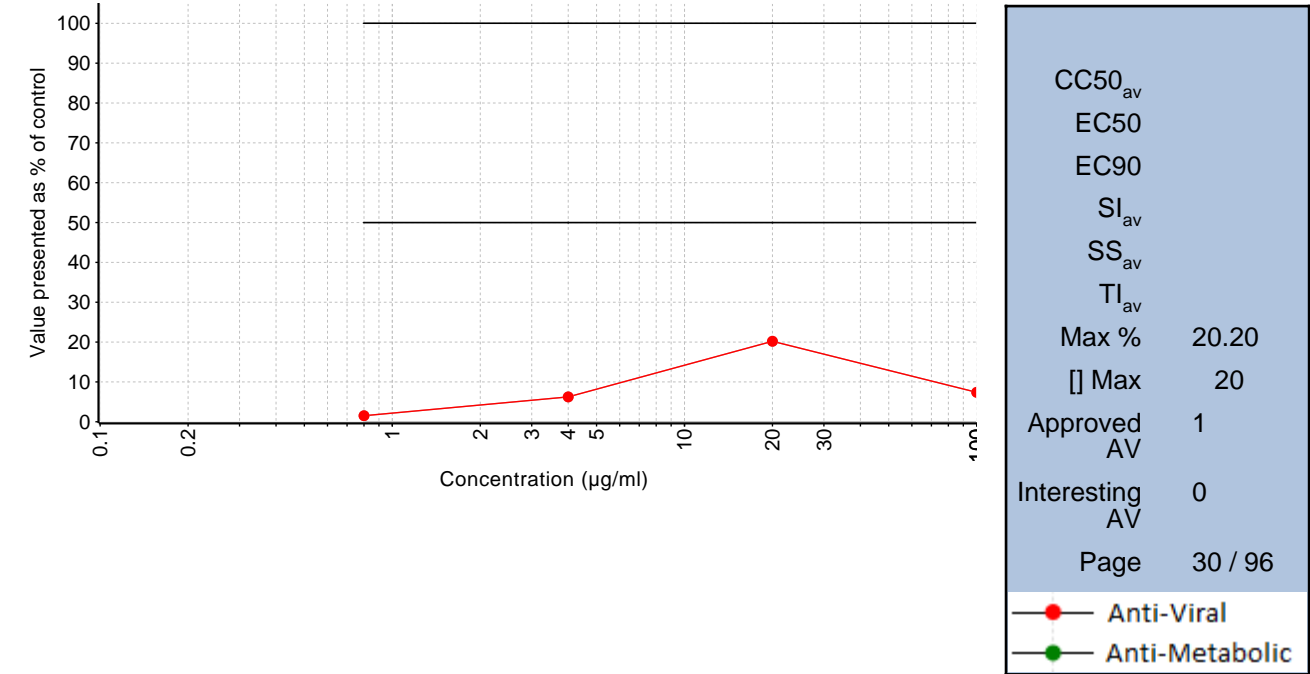

[Export chart data to CSV](#)

| Summary values |      |      |      |
|----------------|------|------|------|
| Statistic      | CC50 | EC50 | EC90 |
| Median         |      |      |      |
| Med.Abs.Dev.   |      |      |      |
| Mean           |      |      |      |
| Stdev.         |      |      |      |

| Compound       | Virus       |      |        | Cell | AV Method  |             | AM Method  |             |
|----------------|-------------|------|--------|------|------------|-------------|------------|-------------|
| Primary code   | Species     | Type | Strain | Type | Method     | Type        | Method     | Type        |
| BAVARI E1_0031 | Enterovirus | 71   | BRCR   | RD   | Absorbance | MTS - 498nm | Microscopy | Tox scoring |

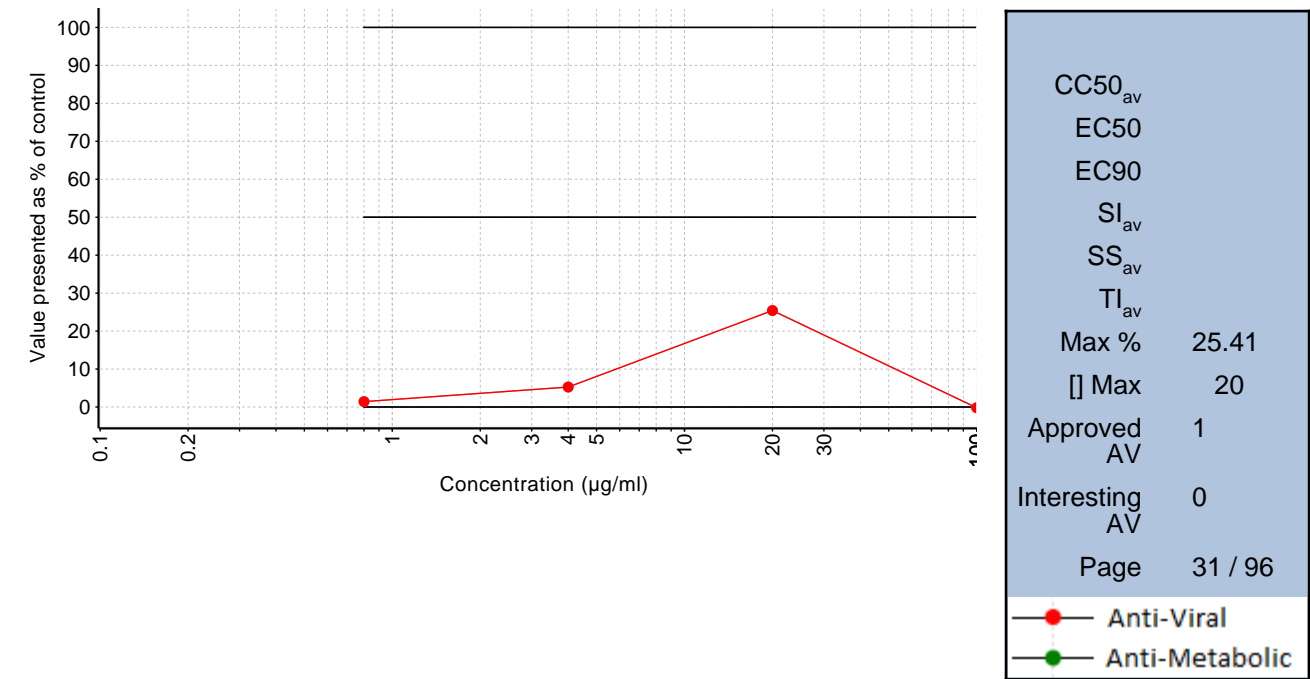

[Export chart data to CSV](#)

| Summary values |      |      |      |
|----------------|------|------|------|
| Statistic      | CC50 | EC50 | EC90 |
| Median         |      |      |      |
| Med.Abs.Dev.   |      |      |      |
| Mean           |      |      |      |
| Stdev.         |      |      |      |



| Compound       | Virus       |      |        | Cell | AV Method  |             | AM Method  |             |
|----------------|-------------|------|--------|------|------------|-------------|------------|-------------|
| Primary code   | Species     | Type | Strain | Type | Method     | Type        | Method     | Type        |
| BAVARI E1_0032 | Enterovirus | 71   | BRCR   | RD   | Absorbance | MTS - 498nm | Microscopy | Tox scoring |

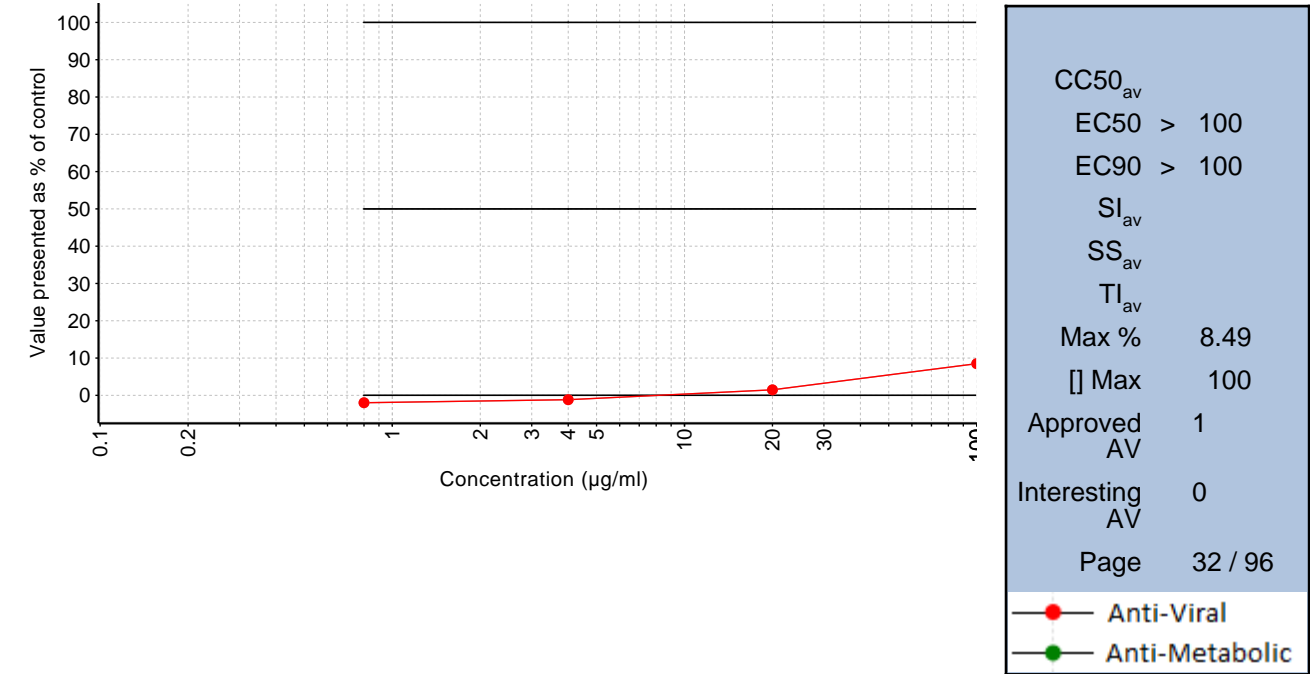

[Export chart data to CSV](#)

| Summary values |      |       |       |
|----------------|------|-------|-------|
| Statistic      | CC50 | EC50  | EC90  |
| Median         |      | > 100 | > 100 |
| Med.Abs.Dev.   |      |       |       |
| Mean           |      | > 100 | > 100 |
| Stdev.         |      |       |       |

| Compound       | Virus       |      |        | Cell | AV Method  |             | AM Method  |             |
|----------------|-------------|------|--------|------|------------|-------------|------------|-------------|
| Primary code   | Species     | Type | Strain | Type | Method     | Type        | Method     | Type        |
| BAVARI E1_0033 | Enterovirus | 71   | BRCR   | RD   | Absorbance | MTS - 498nm | Microscopy | Tox scoring |

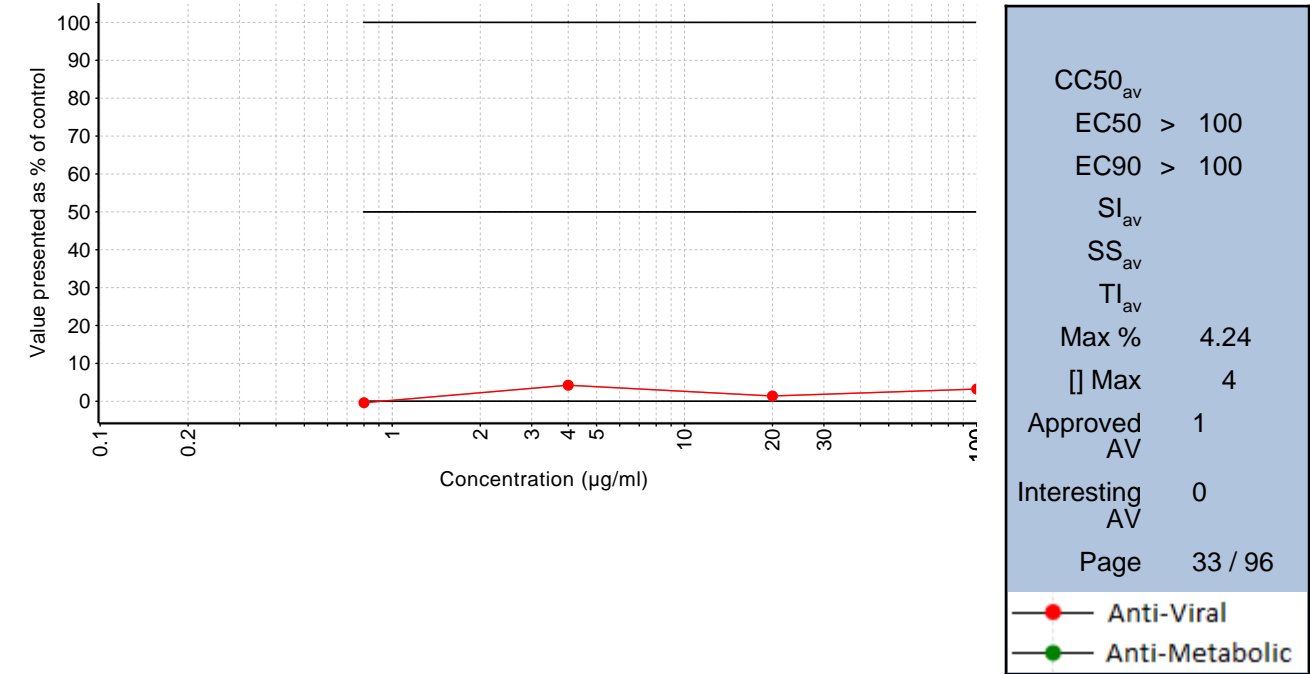

[Export chart data to CSV](#)

| Summary values |      |       |       |
|----------------|------|-------|-------|
| Statistic      | CC50 | EC50  | EC90  |
| Median         |      | > 100 | > 100 |
| Med.Abs.Dev.   |      |       |       |
| Mean           |      | > 100 | > 100 |
| Stdev.         |      |       |       |

| Compound       | Virus       |      |        | Cell | AV Method  |             | AM Method  |             |
|----------------|-------------|------|--------|------|------------|-------------|------------|-------------|
| Primary code   | Species     | Type | Strain | Type | Method     | Type        | Method     | Type        |
| BAVARI E1_0034 | Enterovirus | 71   | BRCR   | RD   | Absorbance | MTS - 498nm | Microscopy | Tox scoring |

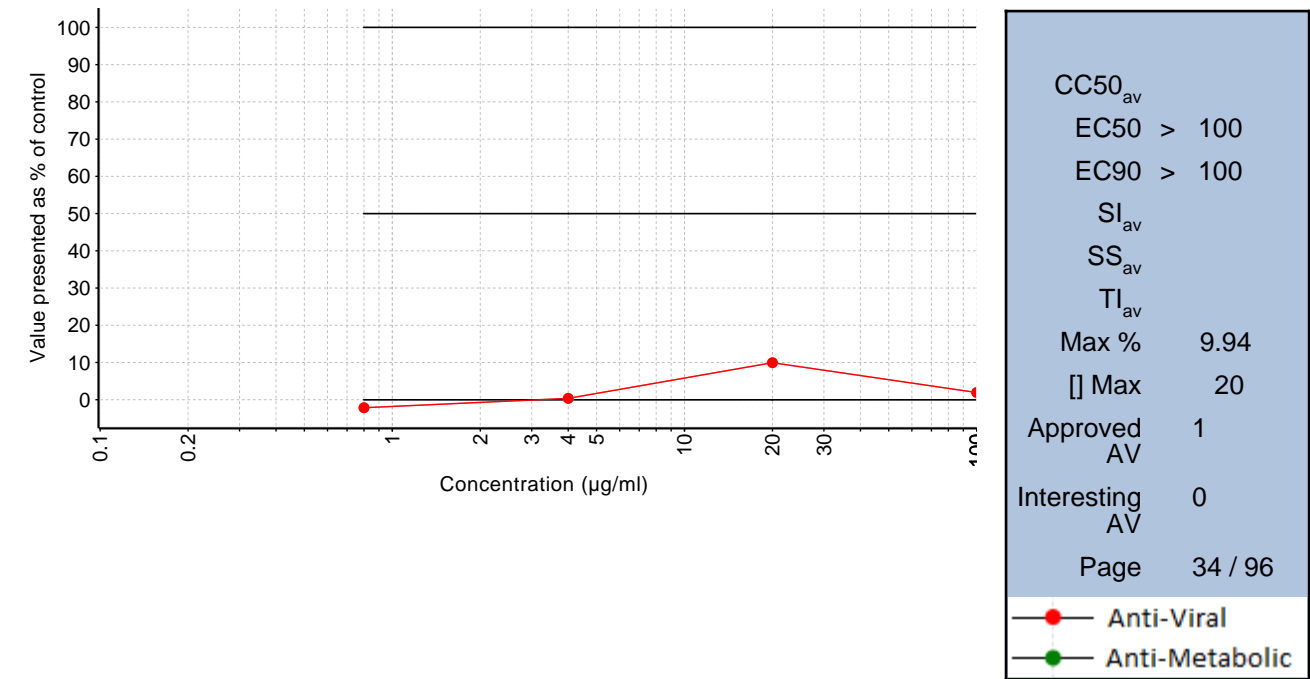

[Export chart data to CSV](#)

| Summary values |      |       |       |
|----------------|------|-------|-------|
| Statistic      | CC50 | EC50  | EC90  |
| Median         |      | > 100 | > 100 |
| Med.Abs.Dev.   |      |       |       |
| Mean           |      | > 100 | > 100 |
| Stdev.         |      |       |       |

| Compound       | Virus       |      |        | Cell | AV Method  |             | AM Method  |             |
|----------------|-------------|------|--------|------|------------|-------------|------------|-------------|
| Primary code   | Species     | Type | Strain | Type | Method     | Type        | Method     | Type        |
| BAVARI E1_0035 | Enterovirus | 71   | BRCR   | RD   | Absorbance | MTS - 498nm | Microscopy | Tox scoring |

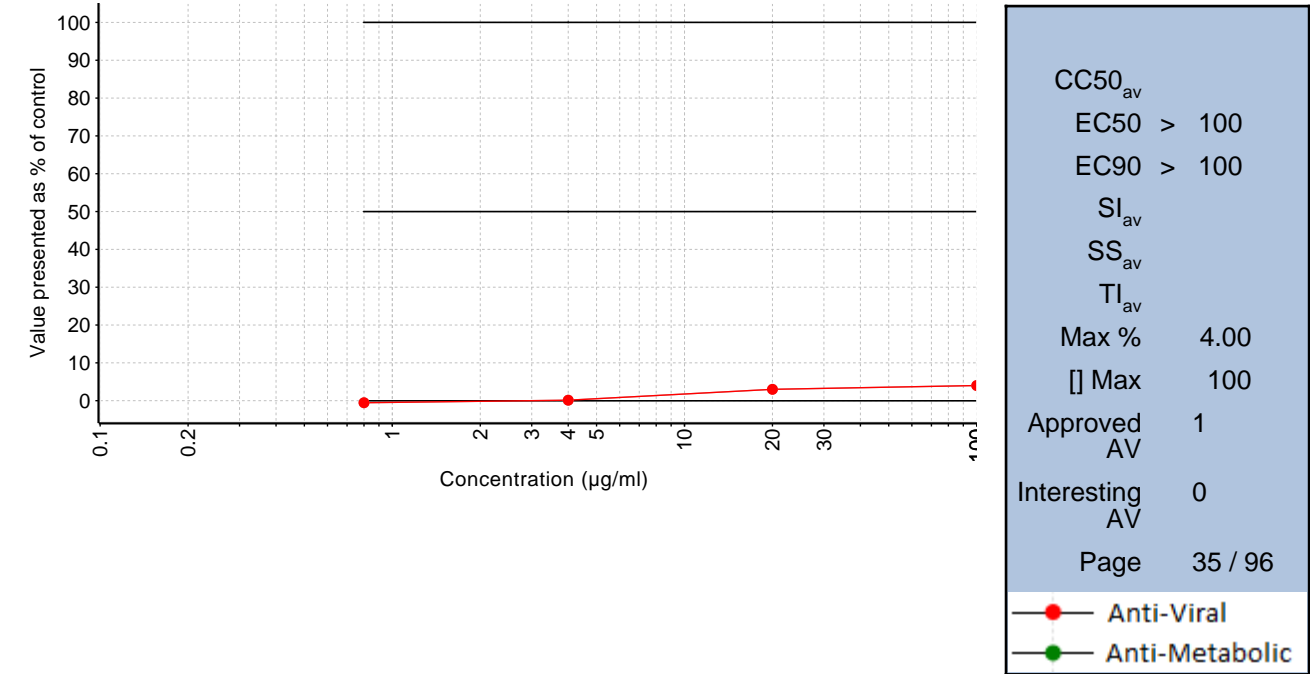

[Export chart data to CSV](#)

| Summary values |      |       |       |
|----------------|------|-------|-------|
| Statistic      | CC50 | EC50  | EC90  |
| Median         |      | > 100 | > 100 |
| Med.Abs.Dev.   |      |       |       |
| Mean           |      | > 100 | > 100 |
| Stdev.         |      |       |       |

| Compound       | Virus       |      |        | Cell | AV Method  |             | AM Method  |             |
|----------------|-------------|------|--------|------|------------|-------------|------------|-------------|
| Primary code   | Species     | Type | Strain | Type | Method     | Type        | Method     | Type        |
| BAVARI E1_0036 | Enterovirus | 71   | BRCR   | RD   | Absorbance | MTS - 498nm | Microscopy | Tox scoring |

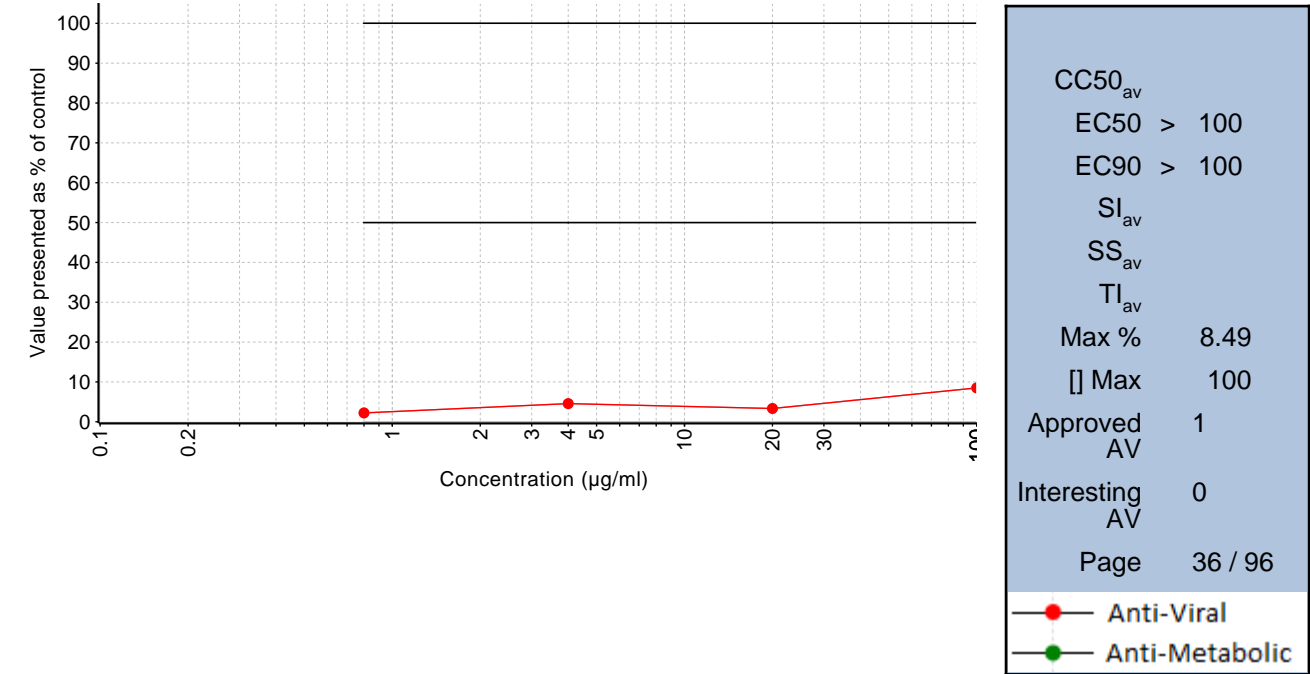

[Export chart data to CSV](#)

| Summary values |      |       |       |
|----------------|------|-------|-------|
| Statistic      | CC50 | EC50  | EC90  |
| Median         |      | > 100 | > 100 |
| Med.Abs.Dev.   |      |       |       |
| Mean           |      | > 100 | > 100 |
| Stdev.         |      |       |       |

| Compound       | Virus       |      |        | Cell | AV Method  |             | AM Method  |             |
|----------------|-------------|------|--------|------|------------|-------------|------------|-------------|
| Primary code   | Species     | Type | Strain | Type | Method     | Type        | Method     | Type        |
| BAVARI E1_0037 | Enterovirus | 71   | BRCR   | RD   | Absorbance | MTS - 498nm | Microscopy | Tox scoring |

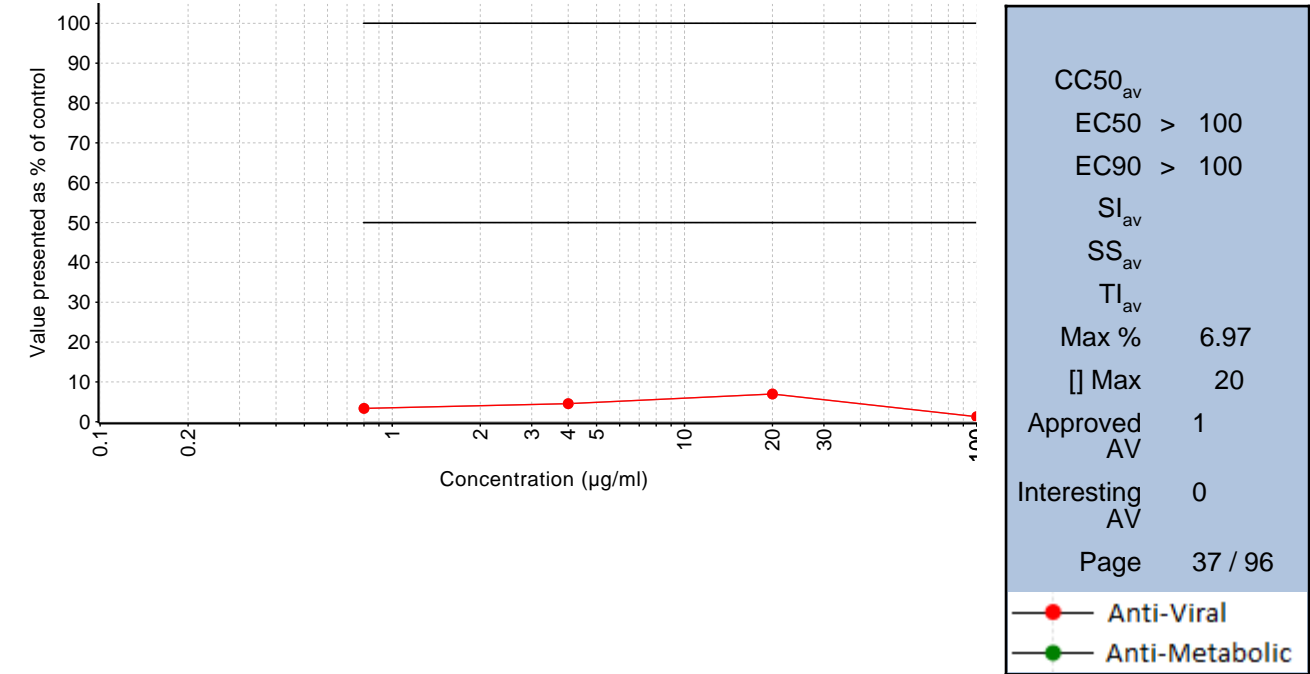

[Export chart data to CSV](#)

| Summary values |      |       |       |
|----------------|------|-------|-------|
| Statistic      | CC50 | EC50  | EC90  |
| Median         |      | > 100 | > 100 |
| Med.Abs.Dev.   |      |       |       |
| Mean           |      | > 100 | > 100 |
| Stdev.         |      |       |       |

| Compound       | Virus       |      |        | Cell | AV Method  |             | AM Method  |             |
|----------------|-------------|------|--------|------|------------|-------------|------------|-------------|
| Primary code   | Species     | Type | Strain | Type | Method     | Type        | Method     | Type        |
| BAVARI E1_0038 | Enterovirus | 71   | BRCR   | RD   | Absorbance | MTS - 498nm | Microscopy | Tox scoring |

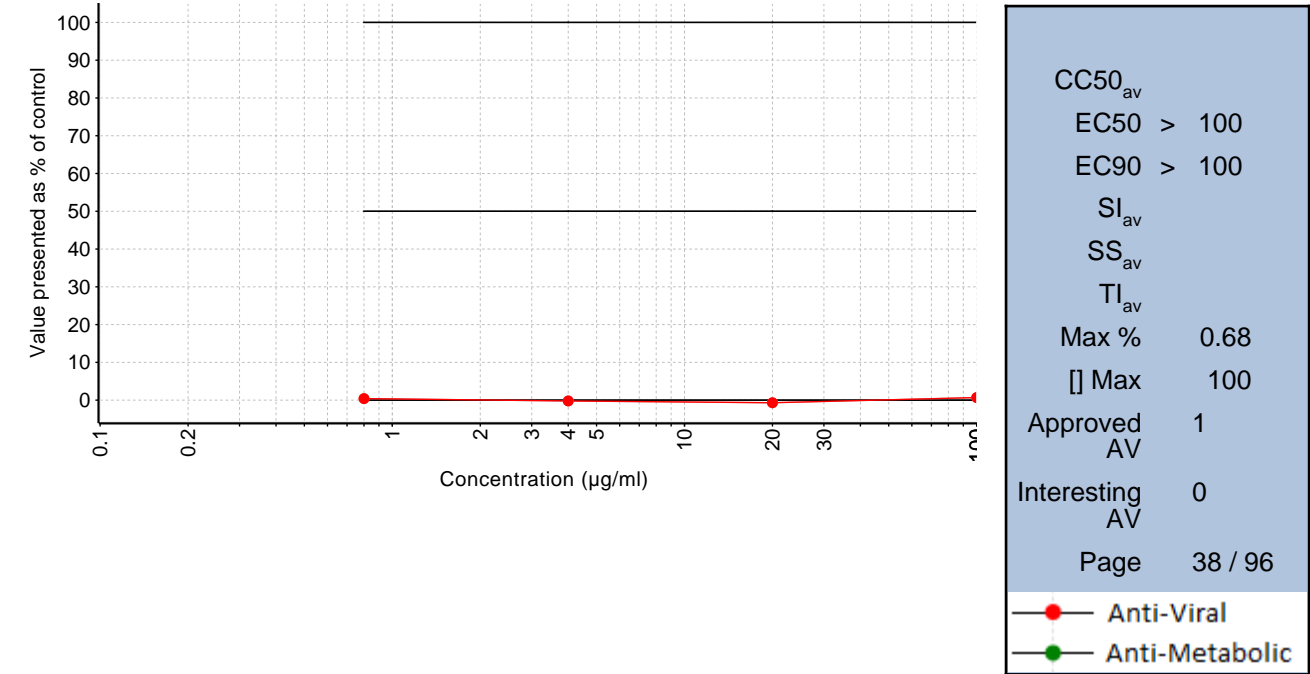

[Export chart data to CSV](#)

| Summary values |      |       |       |
|----------------|------|-------|-------|
| Statistic      | CC50 | EC50  | EC90  |
| Median         |      | > 100 | > 100 |
| Med.Abs.Dev.   |      |       |       |
| Mean           |      | > 100 | > 100 |
| Stdev.         |      |       |       |

| Compound       | Virus       |      |        | Cell | AV Method  |             | AM Method  |             |
|----------------|-------------|------|--------|------|------------|-------------|------------|-------------|
| Primary code   | Species     | Type | Strain | Type | Method     | Type        | Method     | Type        |
| BAVARI E1_0039 | Enterovirus | 71   | BRCR   | RD   | Absorbance | MTS - 498nm | Microscopy | Tox scoring |

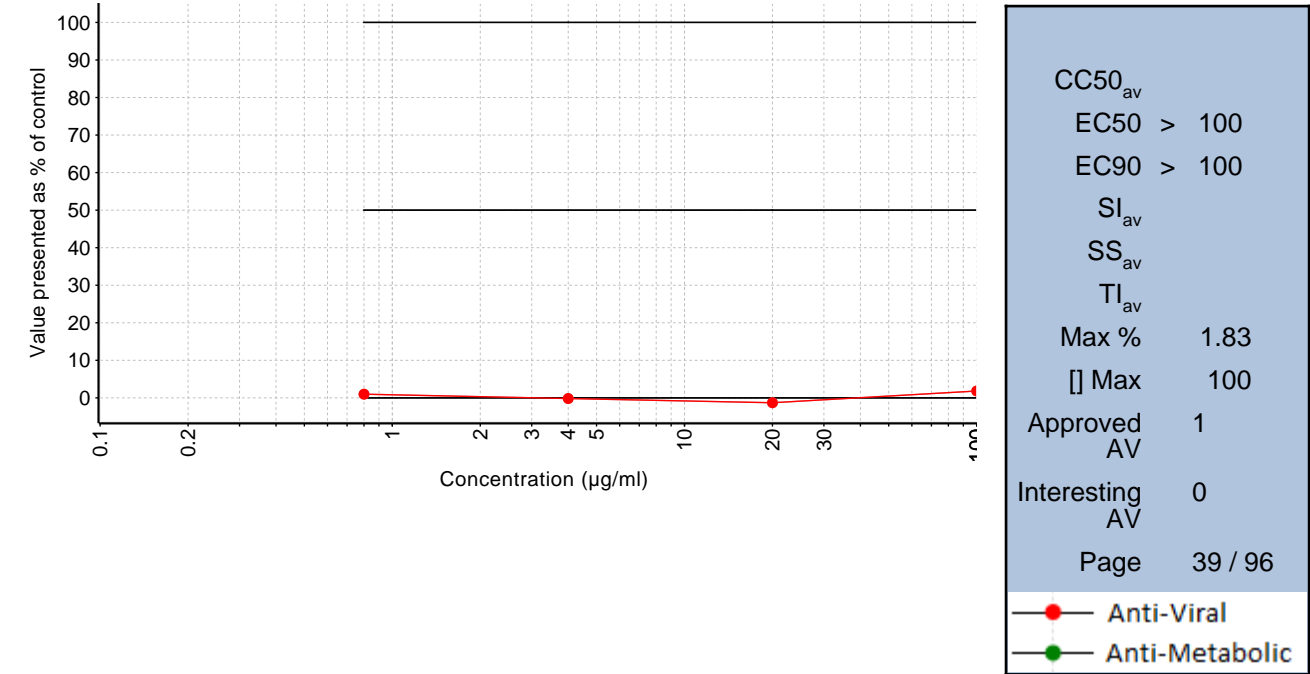

[Export chart data to CSV](#)

| Summary values |      |       |       |
|----------------|------|-------|-------|
| Statistic      | CC50 | EC50  | EC90  |
| Median         |      | > 100 | > 100 |
| Med.Abs.Dev.   |      |       |       |
| Mean           |      | > 100 | > 100 |
| Stdev.         |      |       |       |



| Compound       | Virus       |      |        | Cell | AV Method  |             | AM Method  |             |
|----------------|-------------|------|--------|------|------------|-------------|------------|-------------|
| Primary code   | Species     | Type | Strain | Type | Method     | Type        | Method     | Type        |
| BAVARI E1_0040 | Enterovirus | 71   | BRCR   | RD   | Absorbance | MTS - 498nm | Microscopy | Tox scoring |

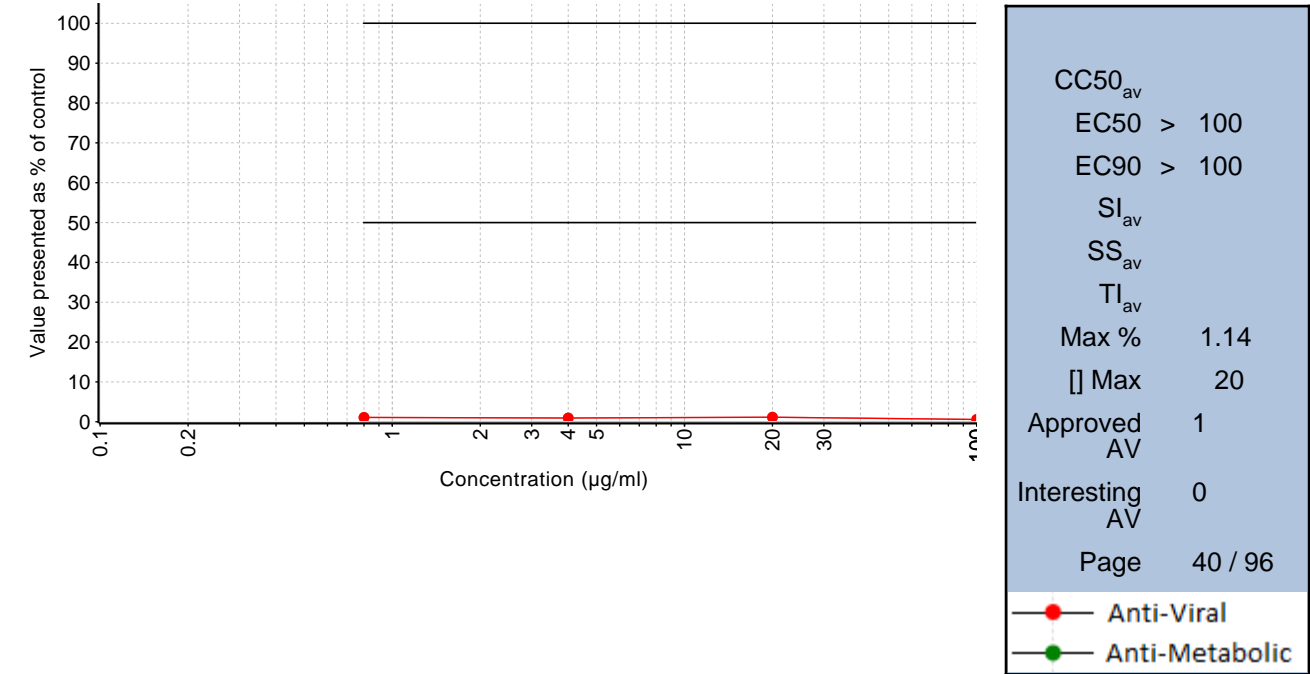

[Export chart data to CSV](#)

| Summary values |      |       |       |
|----------------|------|-------|-------|
| Statistic      | CC50 | EC50  | EC90  |
| Median         |      | > 100 | > 100 |
| Med.Abs.Dev.   |      |       |       |
| Mean           |      | > 100 | > 100 |
| Stdev.         |      |       |       |

| Compound       | Virus       |      |        | Cell | AV Method  |             | AM Method  |             |
|----------------|-------------|------|--------|------|------------|-------------|------------|-------------|
| Primary code   | Species     | Type | Strain | Type | Method     | Type        | Method     | Type        |
| BAVARI E1_0041 | Enterovirus | 71   | BRCR   | RD   | Absorbance | MTS - 498nm | Microscopy | Tox scoring |

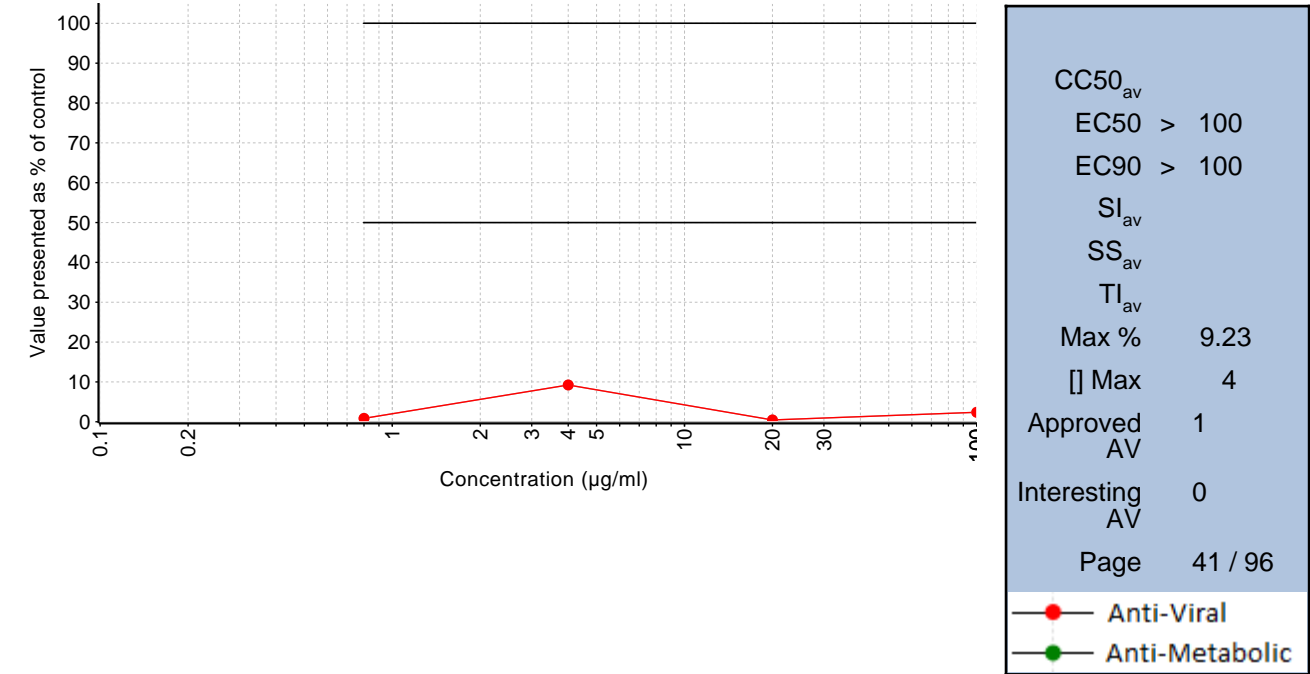

[Export chart data to CSV](#)

| Summary values |      |       |       |
|----------------|------|-------|-------|
| Statistic      | CC50 | EC50  | EC90  |
| Median         |      | > 100 | > 100 |
| Med.Abs.Dev.   |      |       |       |
| Mean           |      | > 100 | > 100 |
| Stdev.         |      |       |       |

| Compound       | Virus       |      |        | Cell | AV Method  |             | AM Method  |             |
|----------------|-------------|------|--------|------|------------|-------------|------------|-------------|
| Primary code   | Species     | Type | Strain | Type | Method     | Type        | Method     | Type        |
| BAVARI E1_0042 | Enterovirus | 71   | BRCR   | RD   | Absorbance | MTS - 498nm | Microscopy | Tox scoring |

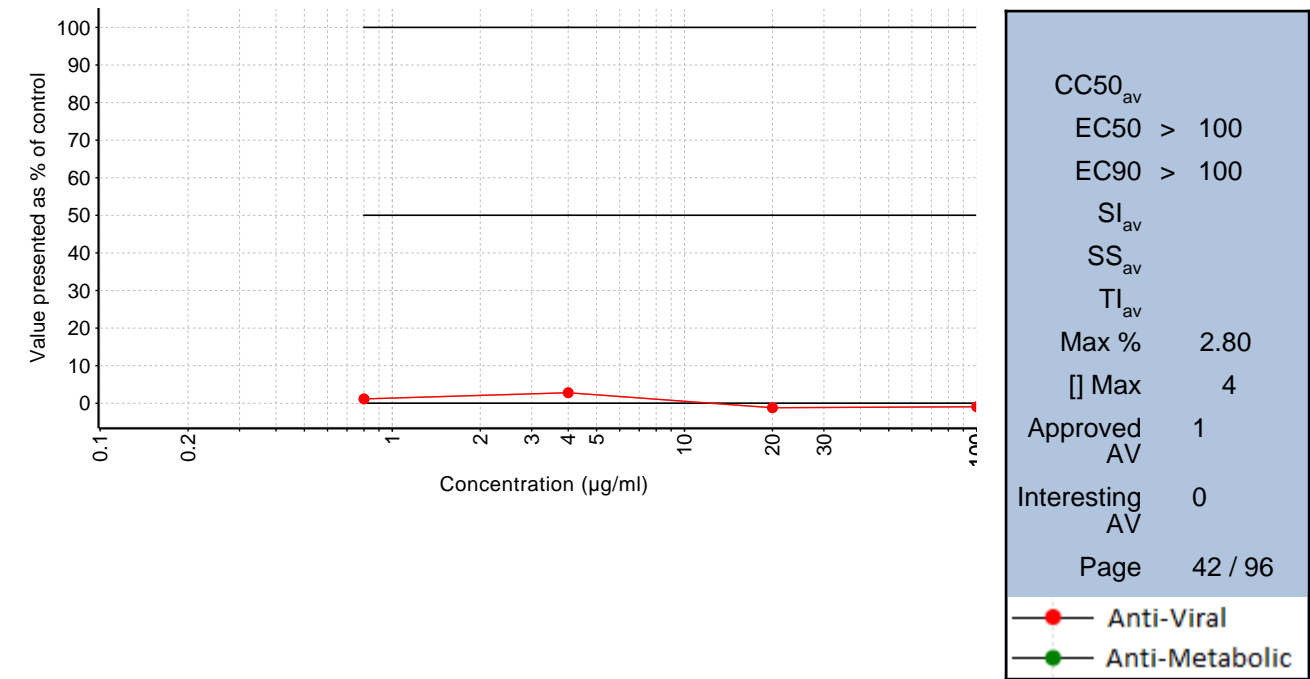

[Export chart data to CSV](#)

| Summary values |      |       |       |
|----------------|------|-------|-------|
| Statistic      | CC50 | EC50  | EC90  |
| Median         |      | > 100 | > 100 |
| Med.Abs.Dev.   |      |       |       |
| Mean           |      | > 100 | > 100 |
| Stdev.         |      |       |       |

| Compound       | Virus       |      |        | Cell | AV Method  |             | AM Method  |             |
|----------------|-------------|------|--------|------|------------|-------------|------------|-------------|
| Primary code   | Species     | Type | Strain | Type | Method     | Type        | Method     | Type        |
| BAVARI E1_0043 | Enterovirus | 71   | BRCR   | RD   | Absorbance | MTS - 498nm | Microscopy | Tox scoring |

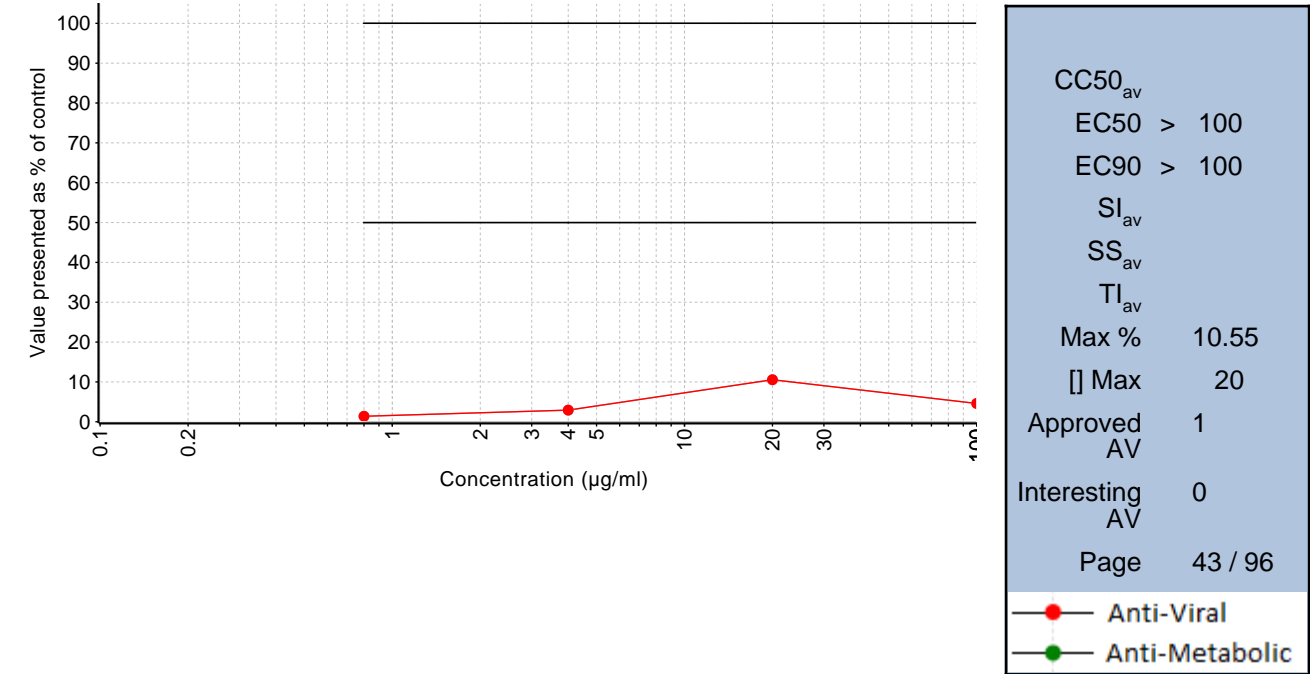

[Export chart data to CSV](#)

| Summary values |      |       |       |
|----------------|------|-------|-------|
| Statistic      | CC50 | EC50  | EC90  |
| Median         |      | > 100 | > 100 |
| Med.Abs.Dev.   |      |       |       |
| Mean           |      | > 100 | > 100 |
| Stdev.         |      |       |       |

| Compound       | Virus       |      |        | Cell | AV Method  |             | AM Method  |             |
|----------------|-------------|------|--------|------|------------|-------------|------------|-------------|
| Primary code   | Species     | Type | Strain | Type | Method     | Type        | Method     | Type        |
| BAVARI E1_0044 | Enterovirus | 71   | BRCR   | RD   | Absorbance | MTS - 498nm | Microscopy | Tox scoring |

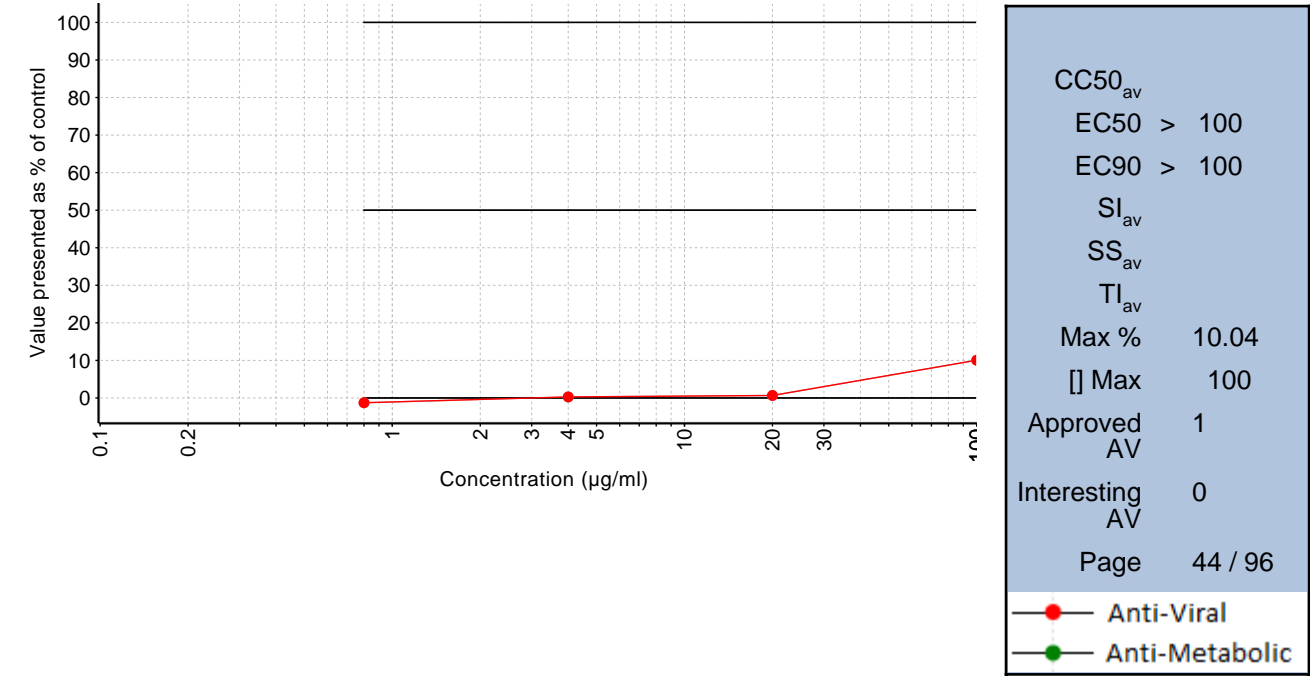

[Export chart data to CSV](#)

| Summary values |      |       |       |
|----------------|------|-------|-------|
| Statistic      | CC50 | EC50  | EC90  |
| Median         |      | > 100 | > 100 |
| Med.Abs.Dev.   |      |       |       |
| Mean           |      | > 100 | > 100 |
| Stdev.         |      |       |       |

| Compound       | Virus       |      |        | Cell | AV Method  |             | AM Method  |             |
|----------------|-------------|------|--------|------|------------|-------------|------------|-------------|
| Primary code   | Species     | Type | Strain | Type | Method     | Type        | Method     | Type        |
| BAVARI E1_0045 | Enterovirus | 71   | BRCR   | RD   | Absorbance | MTS - 498nm | Microscopy | Tox scoring |

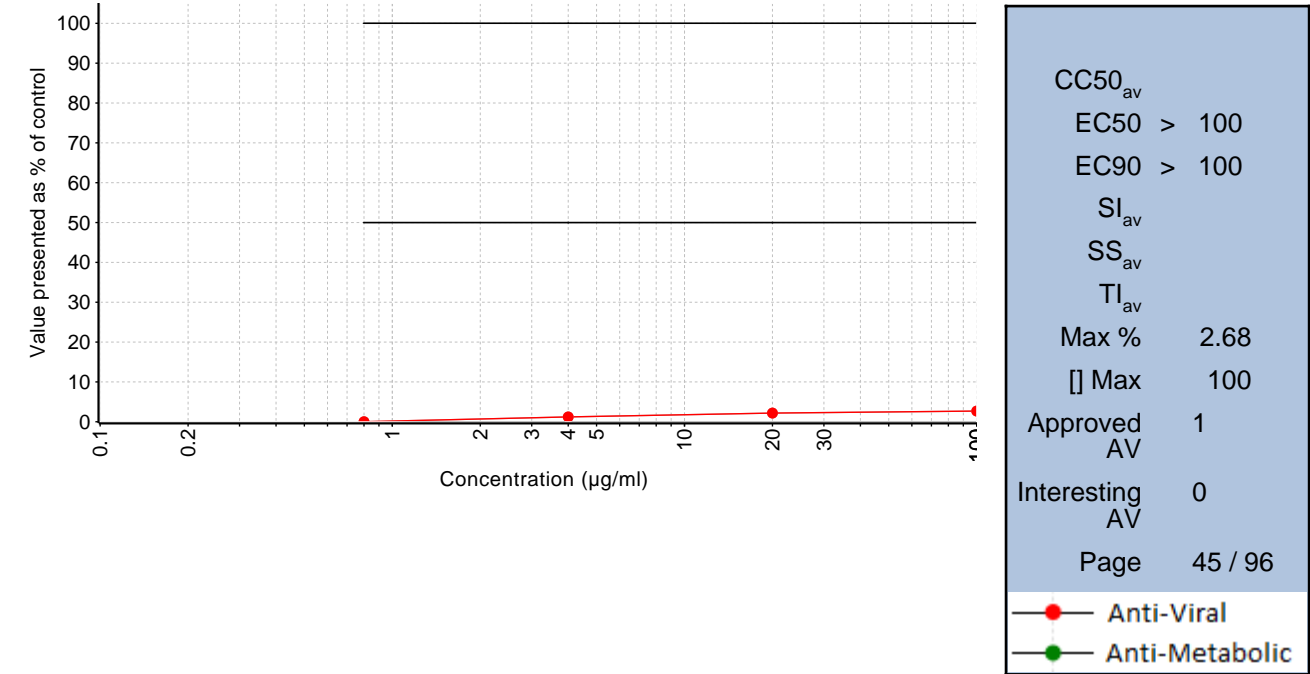

[Export chart data to CSV](#)

| Summary values |      |       |       |
|----------------|------|-------|-------|
| Statistic      | CC50 | EC50  | EC90  |
| Median         |      | > 100 | > 100 |
| Med.Abs.Dev.   |      |       |       |
| Mean           |      | > 100 | > 100 |
| Stdev.         |      |       |       |

| Compound       | Virus       |      |        | Cell | AV Method  |             | AM Method  |             |
|----------------|-------------|------|--------|------|------------|-------------|------------|-------------|
| Primary code   | Species     | Type | Strain | Type | Method     | Type        | Method     | Type        |
| BAVARI E1_0046 | Enterovirus | 71   | BRCR   | RD   | Absorbance | MTS - 498nm | Microscopy | Tox scoring |

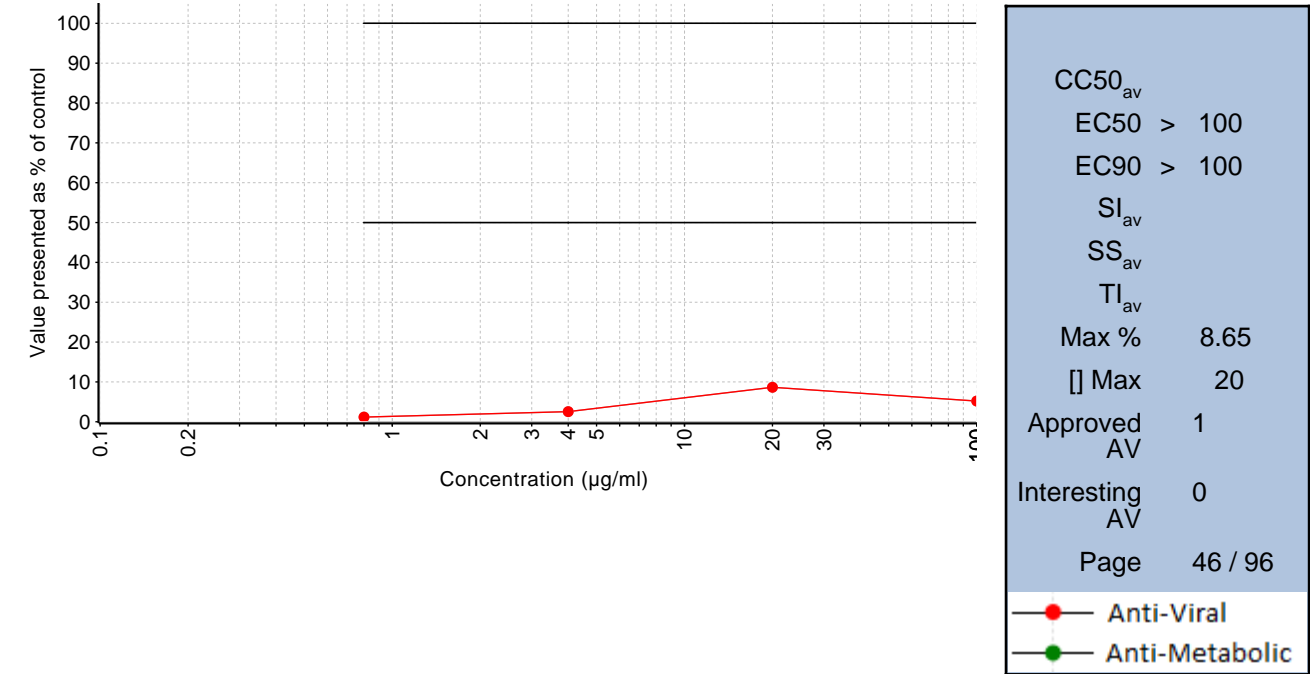

[Export chart data to CSV](#)

| Summary values |      |       |       |
|----------------|------|-------|-------|
| Statistic      | CC50 | EC50  | EC90  |
| Median         |      | > 100 | > 100 |
| Med.Abs.Dev.   |      |       |       |
| Mean           |      | > 100 | > 100 |
| Stdev.         |      |       |       |

| Compound       | Virus       |      |        | Cell | AV Method  |             | AM Method  |             |
|----------------|-------------|------|--------|------|------------|-------------|------------|-------------|
| Primary code   | Species     | Type | Strain | Type | Method     | Type        | Method     | Type        |
| BAVARI E1_0047 | Enterovirus | 71   | BRCR   | RD   | Absorbance | MTS - 498nm | Microscopy | Tox scoring |

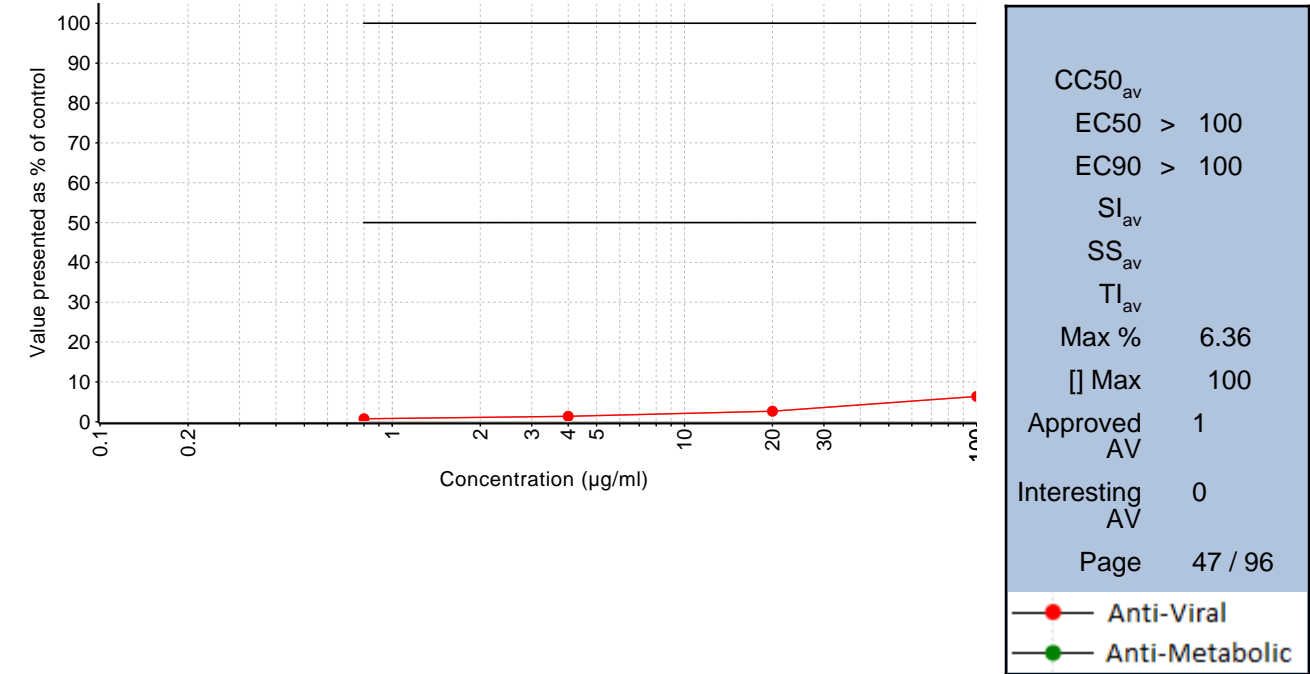

[Export chart data to CSV](#)

| Summary values |      |       |       |
|----------------|------|-------|-------|
| Statistic      | CC50 | EC50  | EC90  |
| Median         |      | > 100 | > 100 |
| Med.Abs.Dev.   |      |       |       |
| Mean           |      | > 100 | > 100 |
| Stdev.         |      |       |       |



| Compound       | Virus       |      |        | Cell | AV Method  |             | AM Method  |             |
|----------------|-------------|------|--------|------|------------|-------------|------------|-------------|
| Primary code   | Species     | Type | Strain | Type | Method     | Type        | Method     | Type        |
| BAVARI E1_0048 | Enterovirus | 71   | BRCR   | RD   | Absorbance | MTS - 498nm | Microscopy | Tox scoring |

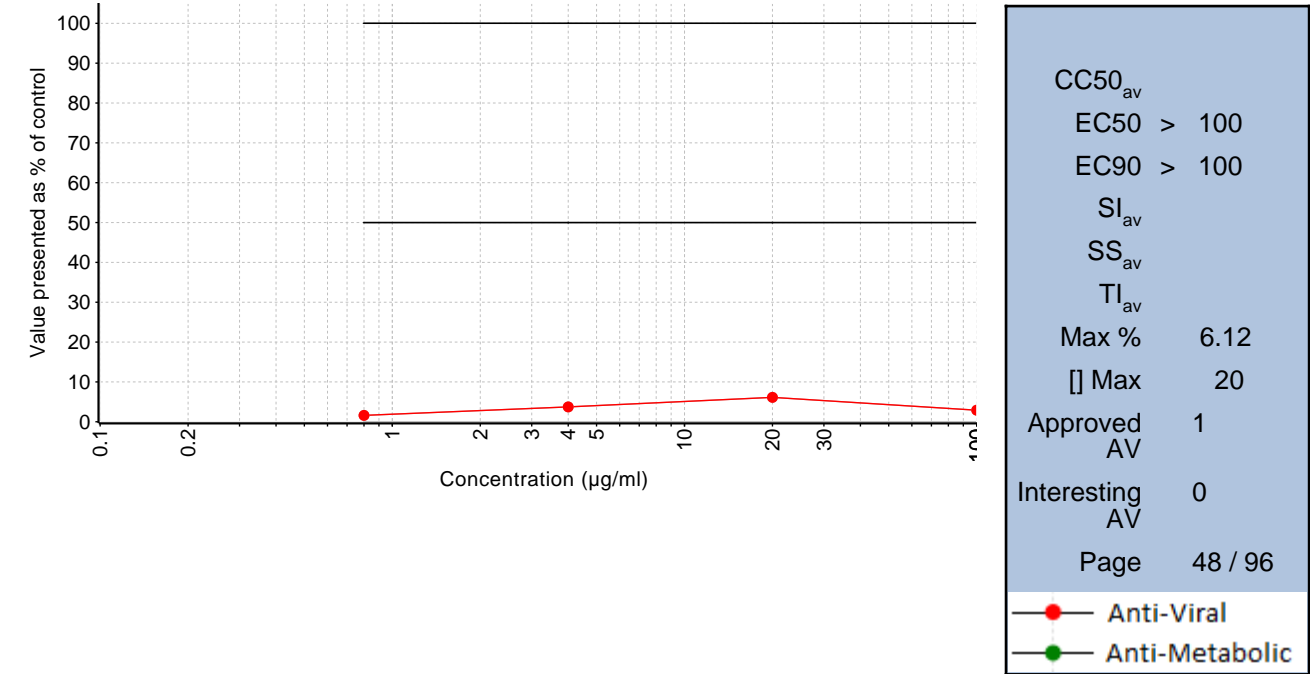

[Export chart data to CSV](#)

| Summary values |      |       |       |
|----------------|------|-------|-------|
| Statistic      | CC50 | EC50  | EC90  |
| Median         |      | > 100 | > 100 |
| Med.Abs.Dev.   |      |       |       |
| Mean           |      | > 100 | > 100 |
| Stdev.         |      |       |       |

| Compound       | Virus       |      |        | Cell | AV Method  |             | AM Method  |             |
|----------------|-------------|------|--------|------|------------|-------------|------------|-------------|
| Primary code   | Species     | Type | Strain | Type | Method     | Type        | Method     | Type        |
| BAVARI E1_0049 | Enterovirus | 71   | BRCR   | RD   | Absorbance | MTS - 498nm | Microscopy | Tox scoring |

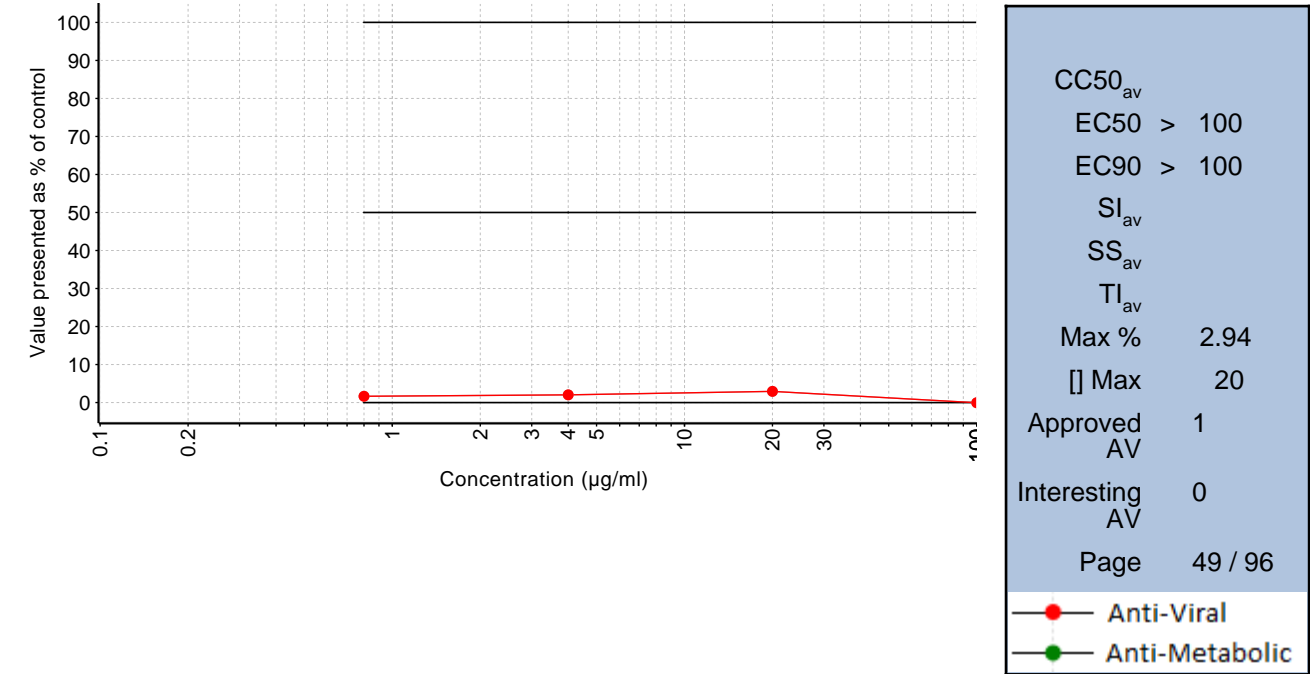

[Export chart data to CSV](#)

| Summary values |      |       |       |
|----------------|------|-------|-------|
| Statistic      | CC50 | EC50  | EC90  |
| Median         |      | > 100 | > 100 |
| Med.Abs.Dev.   |      |       |       |
| Mean           |      | > 100 | > 100 |
| Stdev.         |      |       |       |

| Compound       | Virus       |      |        | Cell | AV Method  |             | AM Method  |             |
|----------------|-------------|------|--------|------|------------|-------------|------------|-------------|
| Primary code   | Species     | Type | Strain | Type | Method     | Type        | Method     | Type        |
| BAVARI E1_0050 | Enterovirus | 71   | BRCR   | RD   | Absorbance | MTS - 498nm | Microscopy | Tox scoring |

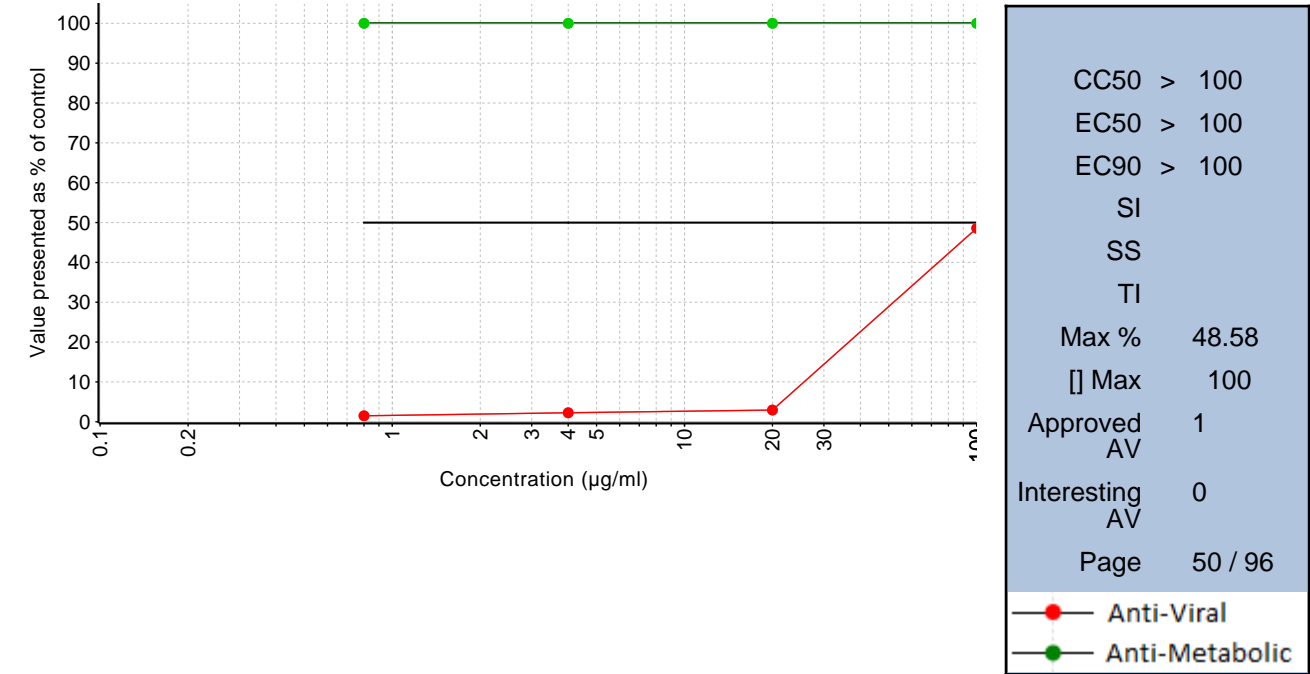

[Export chart data to CSV](#)

| Summary values |      |       |       |
|----------------|------|-------|-------|
| Statistic      | CC50 | EC50  | EC90  |
| Median         |      | > 100 | > 100 |
| Med.Abs.Dev.   |      |       |       |
| Mean           |      | > 100 | > 100 |
| Stdev.         |      |       |       |

| Compound       | Virus       |      |        | Cell | AV Method  |             | AM Method  |             |
|----------------|-------------|------|--------|------|------------|-------------|------------|-------------|
| Primary code   | Species     | Type | Strain | Type | Method     | Type        | Method     | Type        |
| BAVARI E1_0051 | Enterovirus | 71   | BRCR   | RD   | Absorbance | MTS - 498nm | Microscopy | Tox scoring |

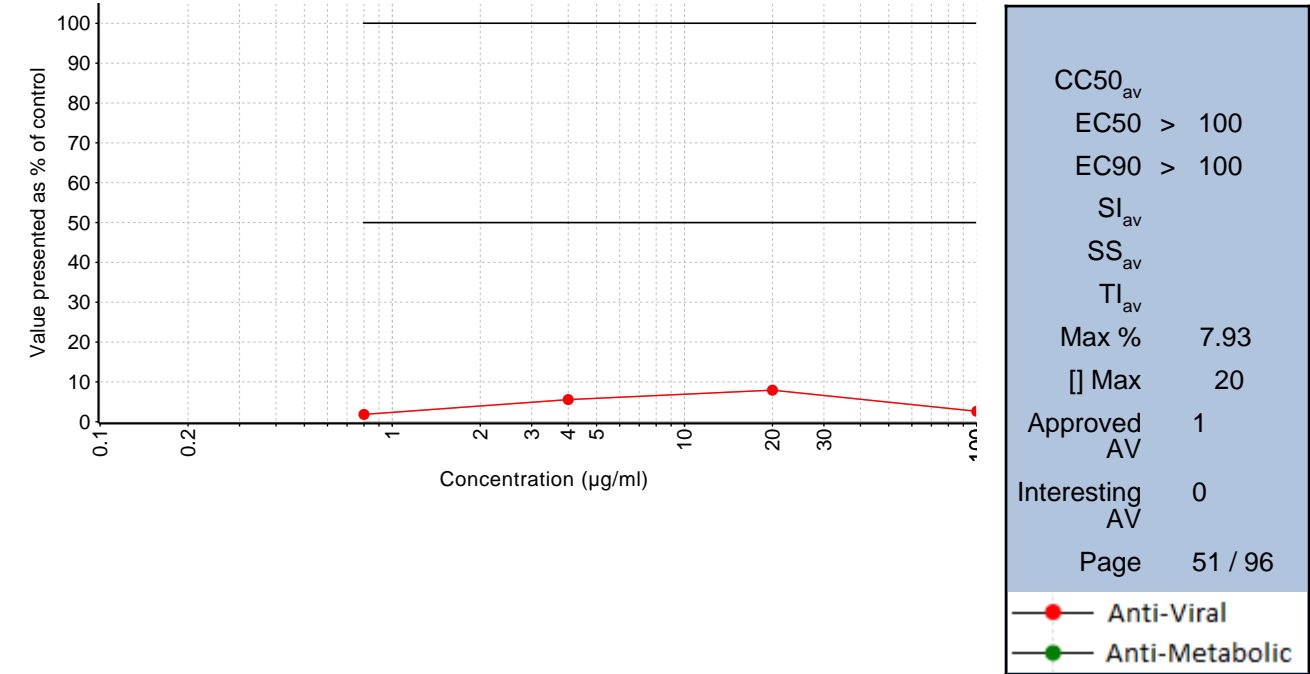

[Export chart data to CSV](#)

| Summary values |      |       |       |
|----------------|------|-------|-------|
| Statistic      | CC50 | EC50  | EC90  |
| Median         |      | > 100 | > 100 |
| Med.Abs.Dev.   |      |       |       |
| Mean           |      | > 100 | > 100 |
| Stdev.         |      |       |       |

| Compound       | Virus       |      |        | Cell | AV Method  |             | AM Method  |             |
|----------------|-------------|------|--------|------|------------|-------------|------------|-------------|
| Primary code   | Species     | Type | Strain | Type | Method     | Type        | Method     | Type        |
| BAVARI E1_0052 | Enterovirus | 71   | BRCR   | RD   | Absorbance | MTS - 498nm | Microscopy | Tox scoring |

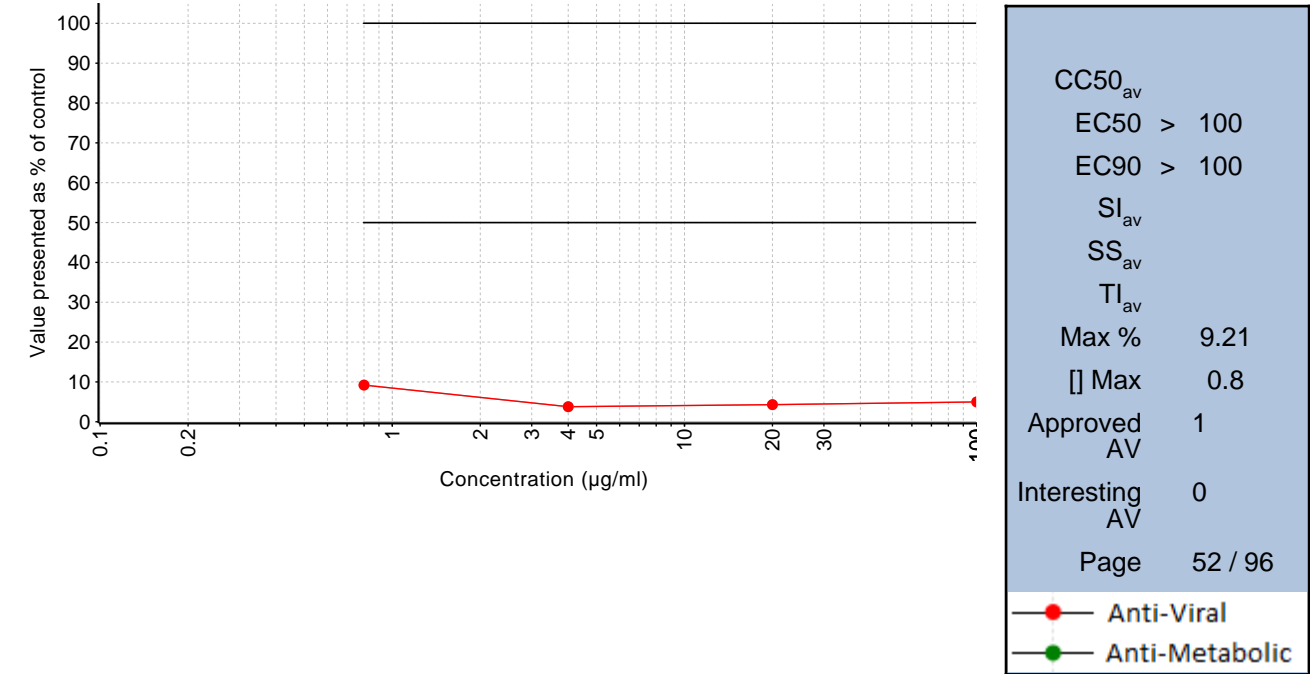

[Export chart data to CSV](#)

| Summary values |      |       |       |
|----------------|------|-------|-------|
| Statistic      | CC50 | EC50  | EC90  |
| Median         |      | > 100 | > 100 |
| Med.Abs.Dev.   |      |       |       |
| Mean           |      | > 100 | > 100 |
| Stdev.         |      |       |       |

| Compound       | Virus       |      |        | Cell | AV Method  |             | AM Method  |             |
|----------------|-------------|------|--------|------|------------|-------------|------------|-------------|
| Primary code   | Species     | Type | Strain | Type | Method     | Type        | Method     | Type        |
| BAVARI E1_0053 | Enterovirus | 71   | BRCR   | RD   | Absorbance | MTS - 498nm | Microscopy | Tox scoring |

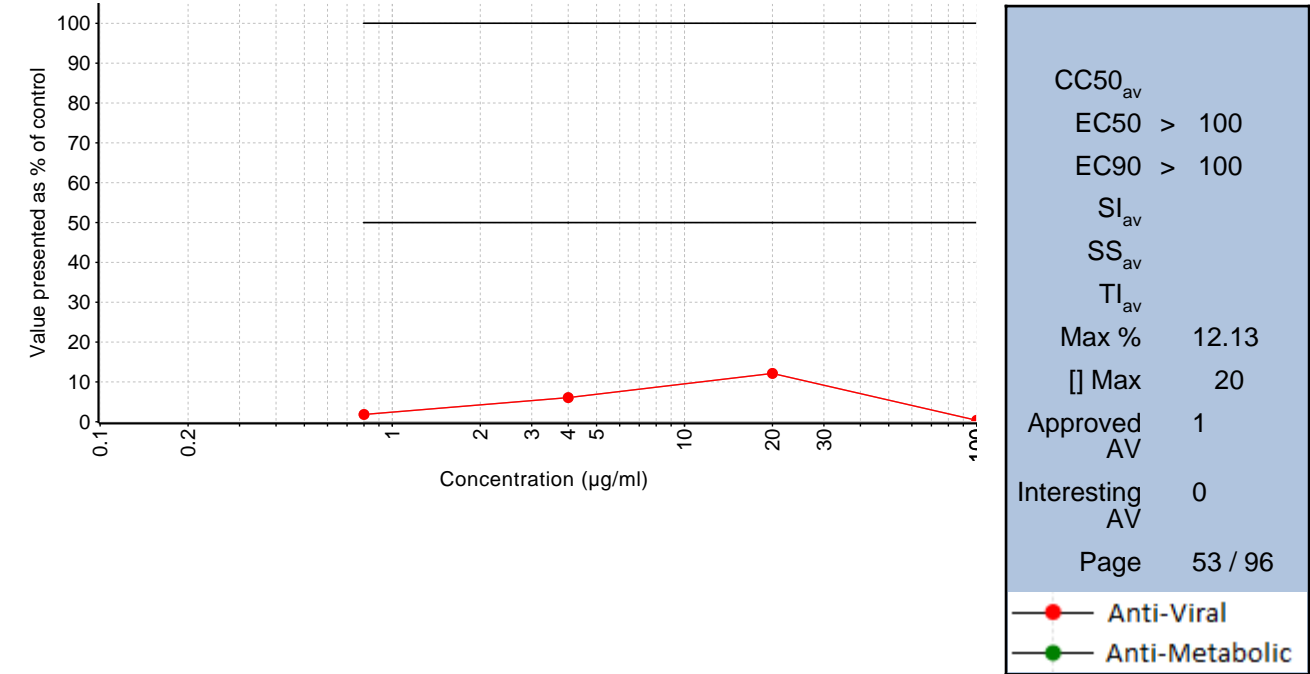

[Export chart data to CSV](#)

| Summary values |      |       |       |
|----------------|------|-------|-------|
| Statistic      | CC50 | EC50  | EC90  |
| Median         |      | > 100 | > 100 |
| Med.Abs.Dev.   |      |       |       |
| Mean           |      | > 100 | > 100 |
| Stdev.         |      |       |       |

| Compound       | Virus       |      |        | Cell | AV Method  |             | AM Method  |             |
|----------------|-------------|------|--------|------|------------|-------------|------------|-------------|
| Primary code   | Species     | Type | Strain | Type | Method     | Type        | Method     | Type        |
| BAVARI E1_0054 | Enterovirus | 71   | BRCR   | RD   | Absorbance | MTS - 498nm | Microscopy | Tox scoring |

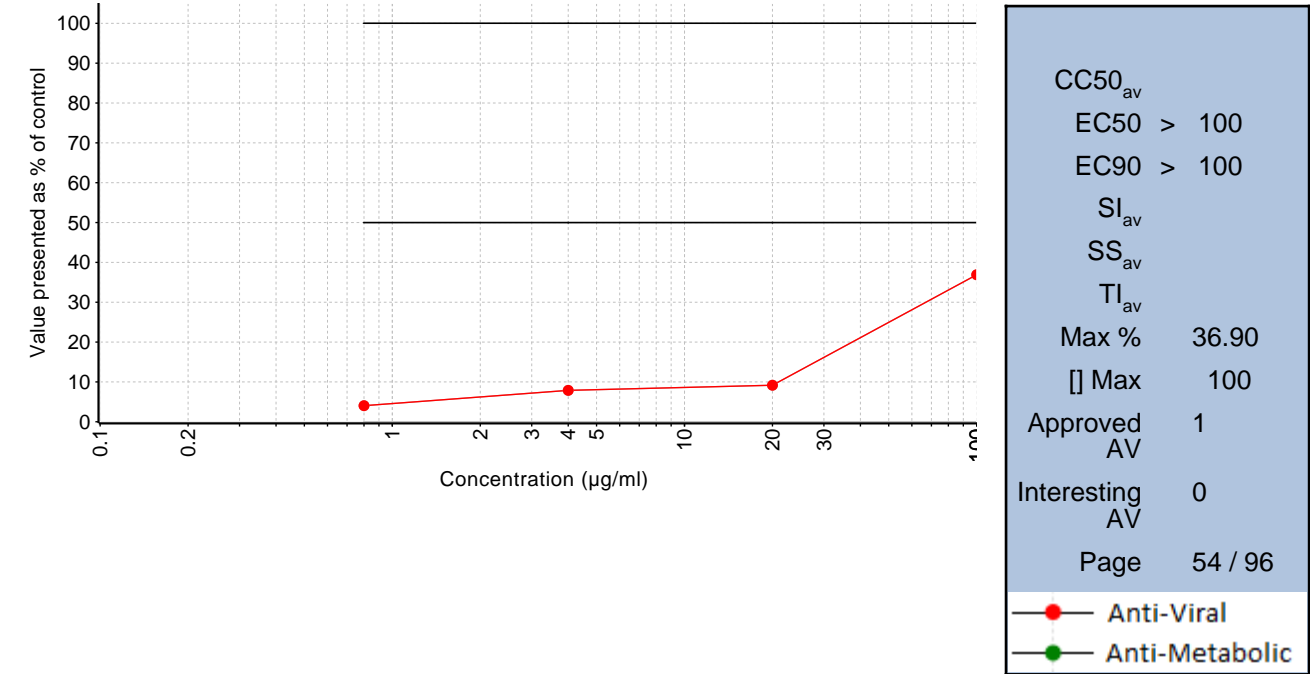

[Export chart data to CSV](#)

| Summary values |      |       |       |
|----------------|------|-------|-------|
| Statistic      | CC50 | EC50  | EC90  |
| Median         |      | > 100 | > 100 |
| Med.Abs.Dev.   |      |       |       |
| Mean           |      | > 100 | > 100 |
| Stdev.         |      |       |       |

| Compound       | Virus       |      |        | Cell | AV Method  |             | AM Method  |             |
|----------------|-------------|------|--------|------|------------|-------------|------------|-------------|
| Primary code   | Species     | Type | Strain | Type | Method     | Type        | Method     | Type        |
| BAVARI E1_0055 | Enterovirus | 71   | BRCR   | RD   | Absorbance | MTS - 498nm | Microscopy | Tox scoring |

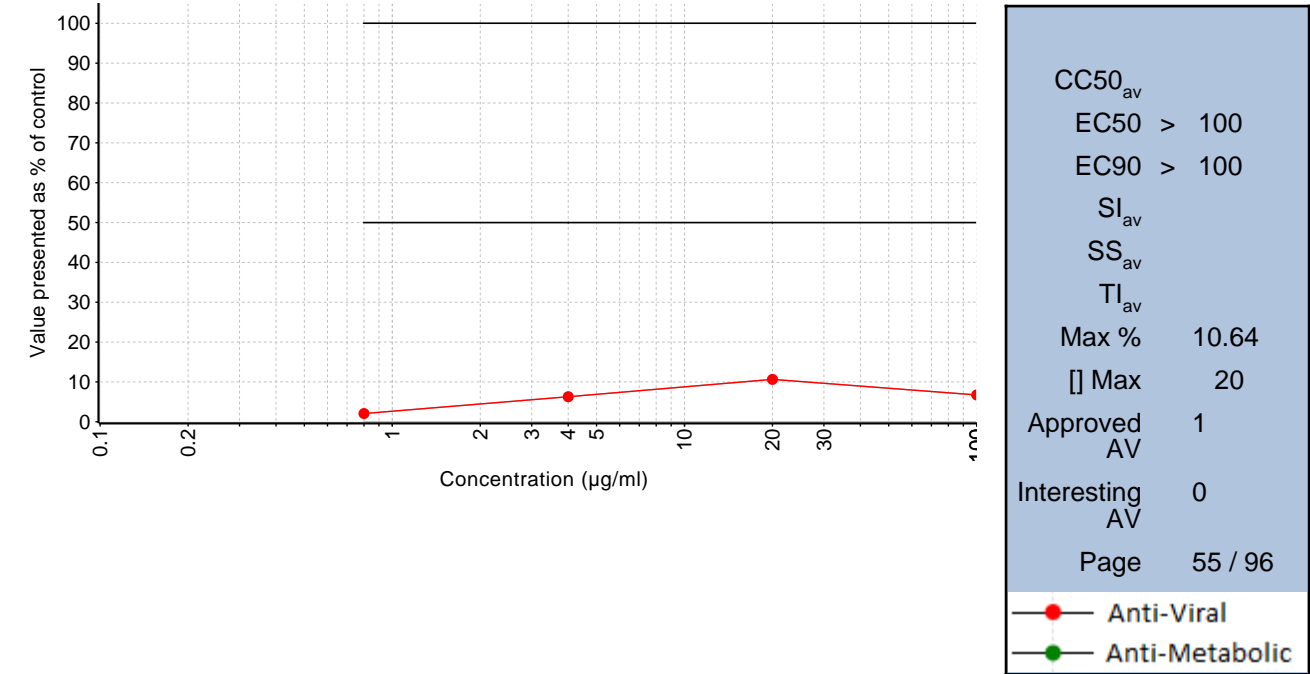

[Export chart data to CSV](#)

| Summary values |      |       |       |
|----------------|------|-------|-------|
| Statistic      | CC50 | EC50  | EC90  |
| Median         |      | > 100 | > 100 |
| Med.Abs.Dev.   |      |       |       |
| Mean           |      | > 100 | > 100 |
| Stdev.         |      |       |       |



| Compound       | Virus       |      |        | Cell | AV Method  |             | AM Method  |             |
|----------------|-------------|------|--------|------|------------|-------------|------------|-------------|
| Primary code   | Species     | Type | Strain | Type | Method     | Type        | Method     | Type        |
| BAVARI E1_0056 | Enterovirus | 71   | BRCR   | RD   | Absorbance | MTS - 498nm | Microscopy | Tox scoring |

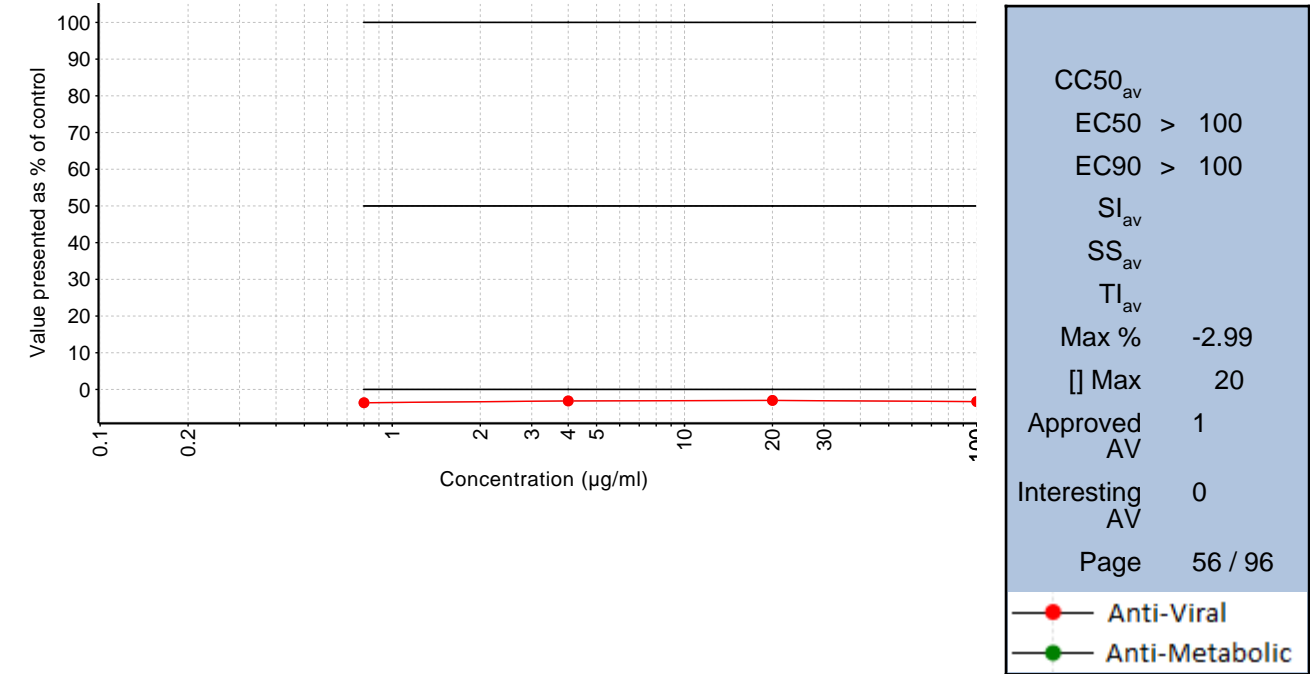

[Export chart data to CSV](#)

| Summary values |      |       |       |
|----------------|------|-------|-------|
| Statistic      | CC50 | EC50  | EC90  |
| Median         |      | > 100 | > 100 |
| Med.Abs.Dev.   |      |       |       |
| Mean           |      | > 100 | > 100 |
| Stdev.         |      |       |       |

| Compound       | Virus       |      |        | Cell | AV Method  |             | AM Method  |             |
|----------------|-------------|------|--------|------|------------|-------------|------------|-------------|
| Primary code   | Species     | Type | Strain | Type | Method     | Type        | Method     | Type        |
| BAVARI E1_0057 | Enterovirus | 71   | BRCR   | RD   | Absorbance | MTS - 498nm | Microscopy | Tox scoring |

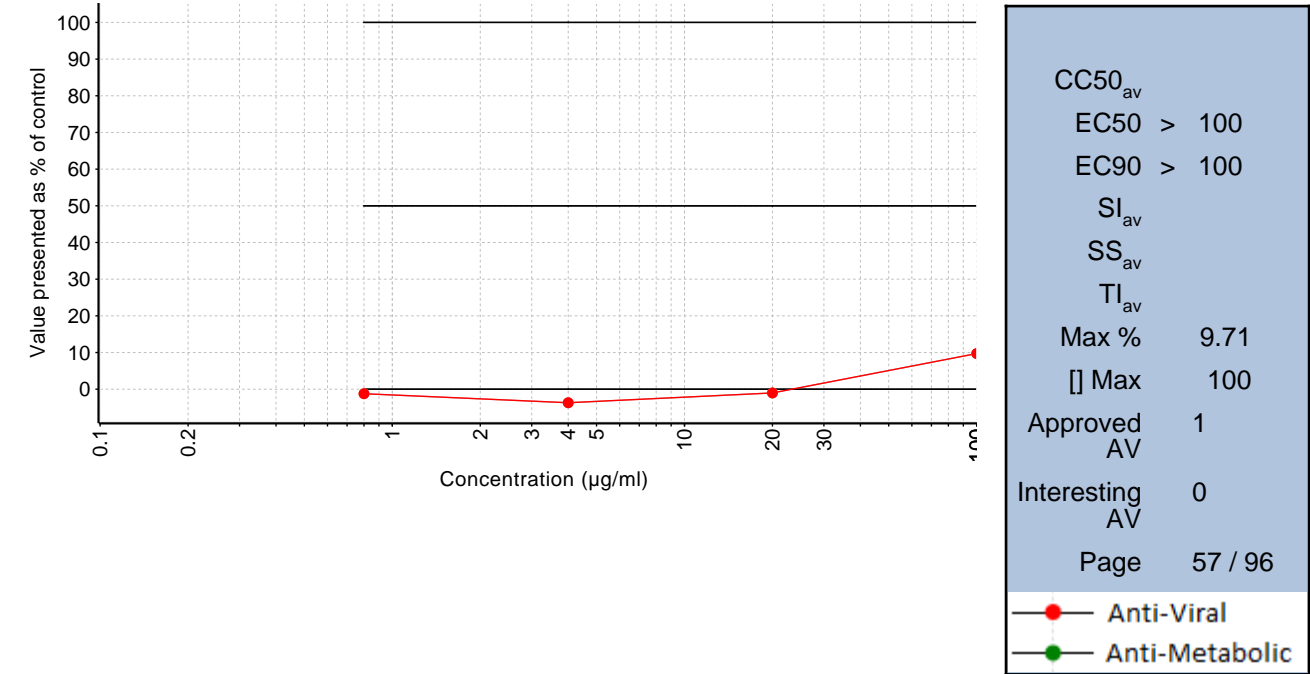

[Export chart data to CSV](#)

| Summary values |      |       |       |
|----------------|------|-------|-------|
| Statistic      | CC50 | EC50  | EC90  |
| Median         |      | > 100 | > 100 |
| Med.Abs.Dev.   |      |       |       |
| Mean           |      | > 100 | > 100 |
| Stdev.         |      |       |       |

| Compound       | Virus       |      |        | Cell | AV Method  |             | AM Method  |             |
|----------------|-------------|------|--------|------|------------|-------------|------------|-------------|
| Primary code   | Species     | Type | Strain | Type | Method     | Type        | Method     | Type        |
| BAVARI E1_0058 | Enterovirus | 71   | BRCR   | RD   | Absorbance | MTS - 498nm | Microscopy | Tox scoring |

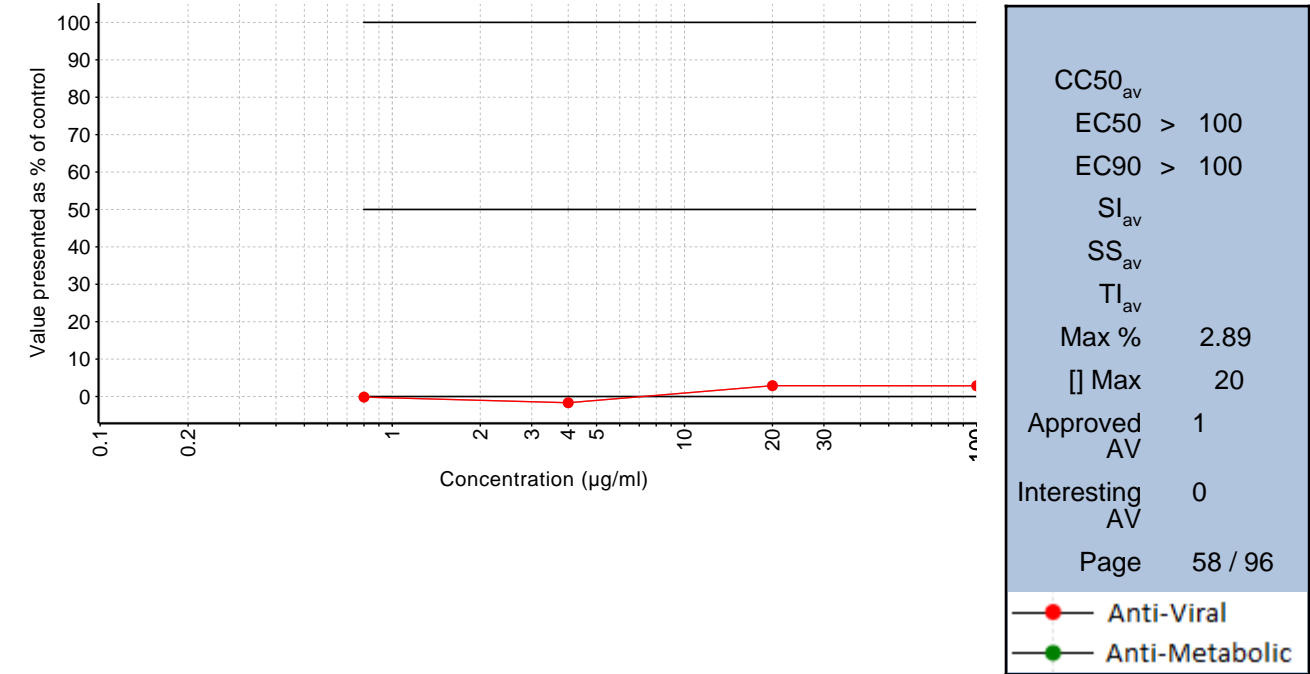

[Export chart data to CSV](#)

| Summary values |      |       |       |
|----------------|------|-------|-------|
| Statistic      | CC50 | EC50  | EC90  |
| Median         |      | > 100 | > 100 |
| Med.Abs.Dev.   |      |       |       |
| Mean           |      | > 100 | > 100 |
| Stdev.         |      |       |       |

| Compound       | Virus       |      |        | Cell | AV Method  |             | AM Method  |             |
|----------------|-------------|------|--------|------|------------|-------------|------------|-------------|
| Primary code   | Species     | Type | Strain | Type | Method     | Type        | Method     | Type        |
| BAVARI E1_0059 | Enterovirus | 71   | BRCR   | RD   | Absorbance | MTS - 498nm | Microscopy | Tox scoring |

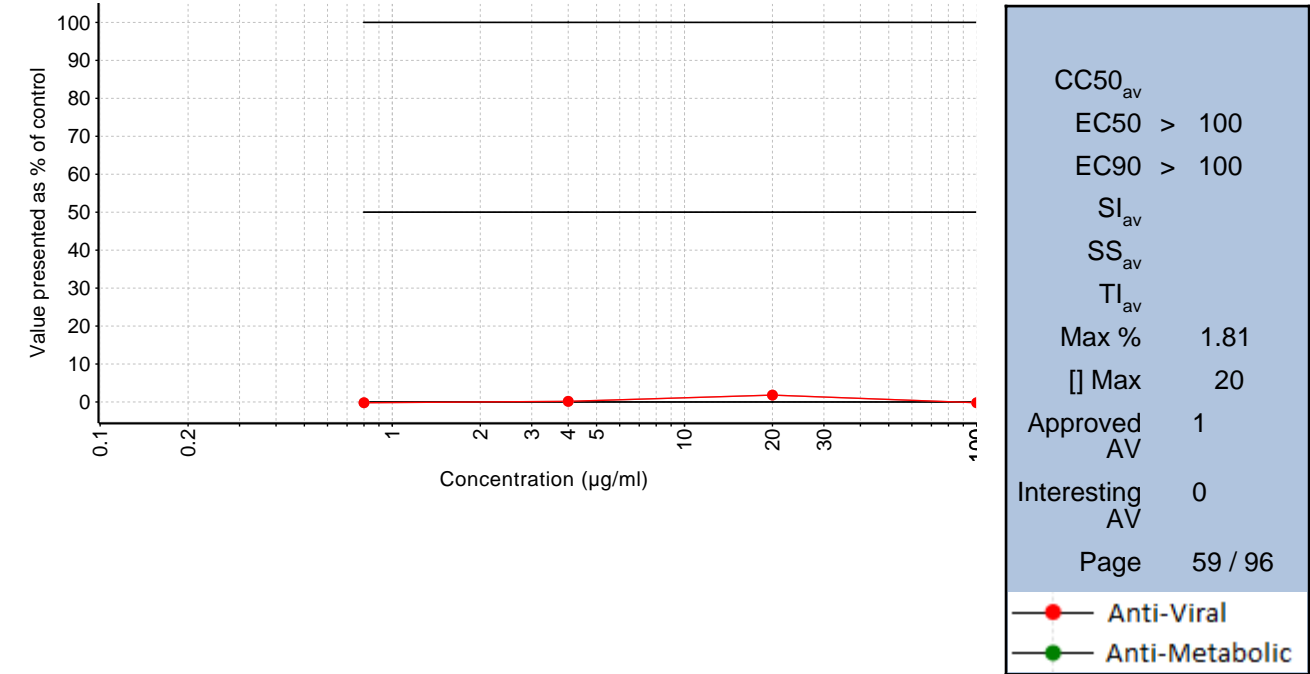

[Export chart data to CSV](#)

| Summary values |      |       |       |
|----------------|------|-------|-------|
| Statistic      | CC50 | EC50  | EC90  |
| Median         |      | > 100 | > 100 |
| Med.Abs.Dev.   |      |       |       |
| Mean           |      | > 100 | > 100 |
| Stdev.         |      |       |       |

| Compound       | Virus       |      |        | Cell | AV Method  |             | AM Method  |             |
|----------------|-------------|------|--------|------|------------|-------------|------------|-------------|
| Primary code   | Species     | Type | Strain | Type | Method     | Type        | Method     | Type        |
| BAVARI E1_0060 | Enterovirus | 71   | BRCR   | RD   | Absorbance | MTS - 498nm | Microscopy | Tox scoring |

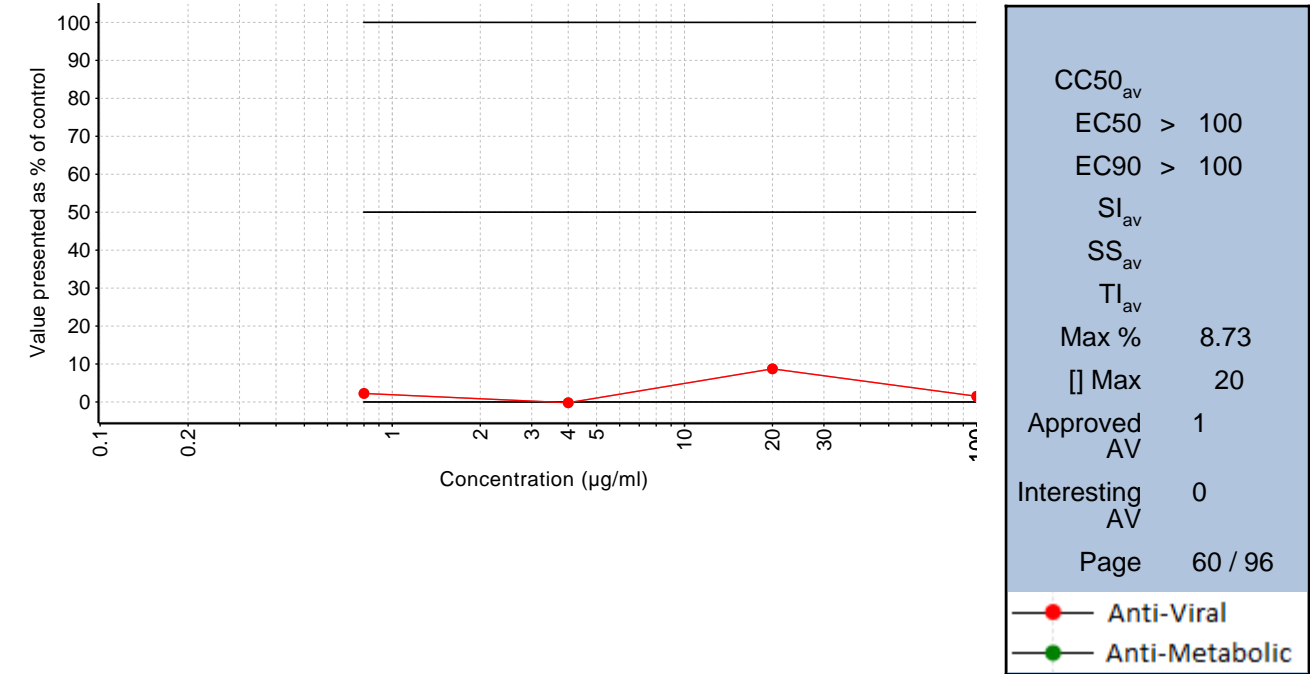

[Export chart data to CSV](#)

| Summary values |      |       |       |
|----------------|------|-------|-------|
| Statistic      | CC50 | EC50  | EC90  |
| Median         |      | > 100 | > 100 |
| Med.Abs.Dev.   |      |       |       |
| Mean           |      | > 100 | > 100 |
| Stdev.         |      |       |       |
