# Supplementary material for: Antiviral and Cytotoxic Activity of Different Plant Parts of Banana (Musa spp.)
Source: MDPI journal article supplement (doi:10.3390/v12050549), 2020-05-15
Supplement: s1 [file s1]

# Antiviral and Cytotoxic Activity of Different Plant Parts of Banana (*Musa* spp.)

Sujogya Kumar Panda <sup>1,2,\*</sup>, Ana Hortência Fonsêca Castro <sup>1,3</sup>, *Ramin Saleh Jouneghani* <sup>1</sup>,  
Pieter Leyssen <sup>4</sup>, Johan Neyts <sup>4</sup>, Rony Swennen <sup>5,6,7</sup> and Walter Luyten <sup>1</sup>

<sup>1</sup> Department of Biology, Katholieke Universiteit Leuven, 3000 Leuven, Belgium;  
[acastro905@gmail.com](mailto:acastro905@gmail.com) (A.H.F.C.); [r.saleh.j@gmail.com](mailto:r.saleh.j@gmail.com) (R.S.J.); [walter.luyten@kuleuven.be](mailto:walter.luyten@kuleuven.be) (W.L.)

<sup>2</sup> Mayurbhanj Biological Research (MBR), Bhanjpur, Baripada 757002, Odisha, India

<sup>3</sup> Plant Physiology and Biochemistry, Universidade Federal de São João Del-Rei, Av. Sebastião  
Gonçalves Coelho, 400—Chanandour, Divinópolis MG 35501-296, Brazil

<sup>4</sup> Rega Institute for Medical Research, Laboratory of Virology and Chemotherapy, Katholieke  
Universiteit Leuven, 3000 Leuven, Belgium; [pieter.leyssen@kuleuven.be](mailto:pieter.leyssen@kuleuven.be) (P.L.);  
[johan.neyts@kuleuven.be](mailto:johan.neyts@kuleuven.be) (J.N.)

<sup>5</sup> International Institute of Tropical Agriculture, Arusha P.O. Box 447, Tanzania;  
[rony.swennen@kuleuven.be](mailto:rony.swennen@kuleuven.be)

<sup>6</sup> Laboratory of Tropical Crop Improvement, Division of Crop Biotechnics, Katholieke Universiteit  
Leuven, 3001 Leuven, Belgium

<sup>7</sup> Bioversity International, 3001 Leuven, Belgium

\* Correspondence: [sujogya.panda@kuleuven.be](mailto:sujogya.panda@kuleuven.be); Tel.: +32-16-373467

Supplementary material IV

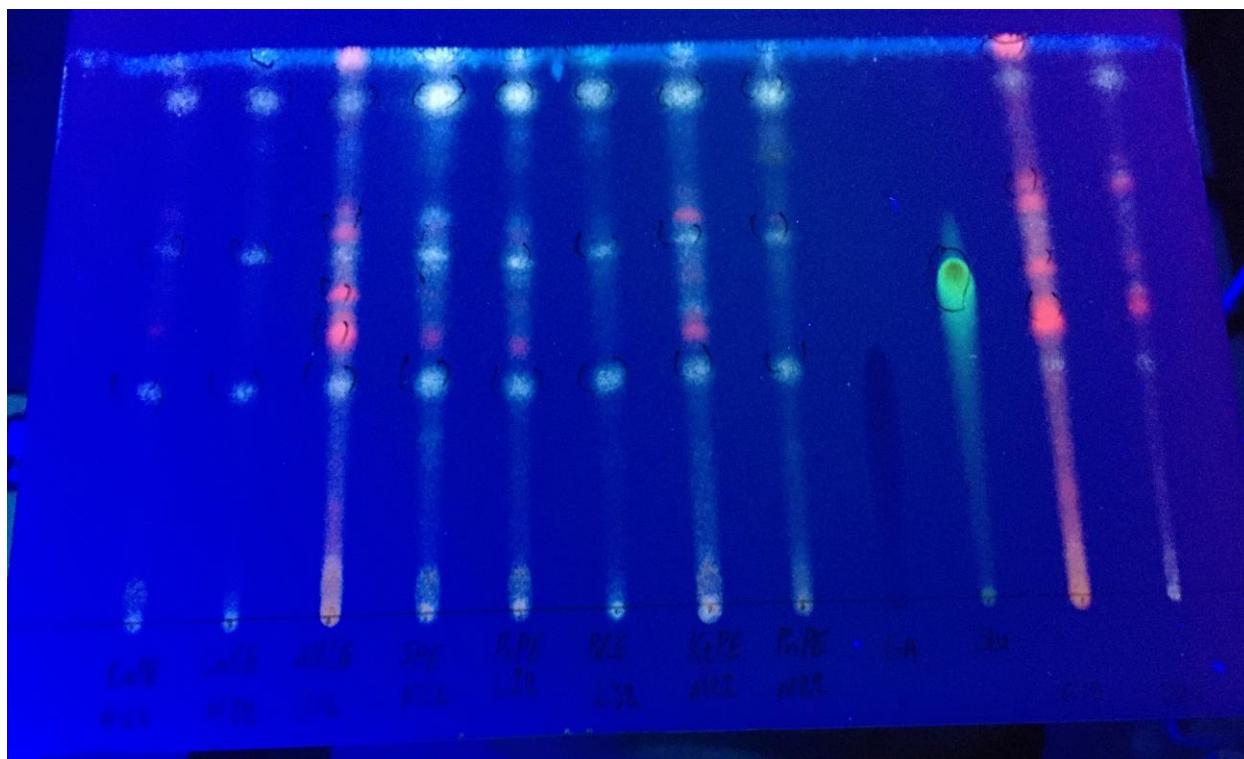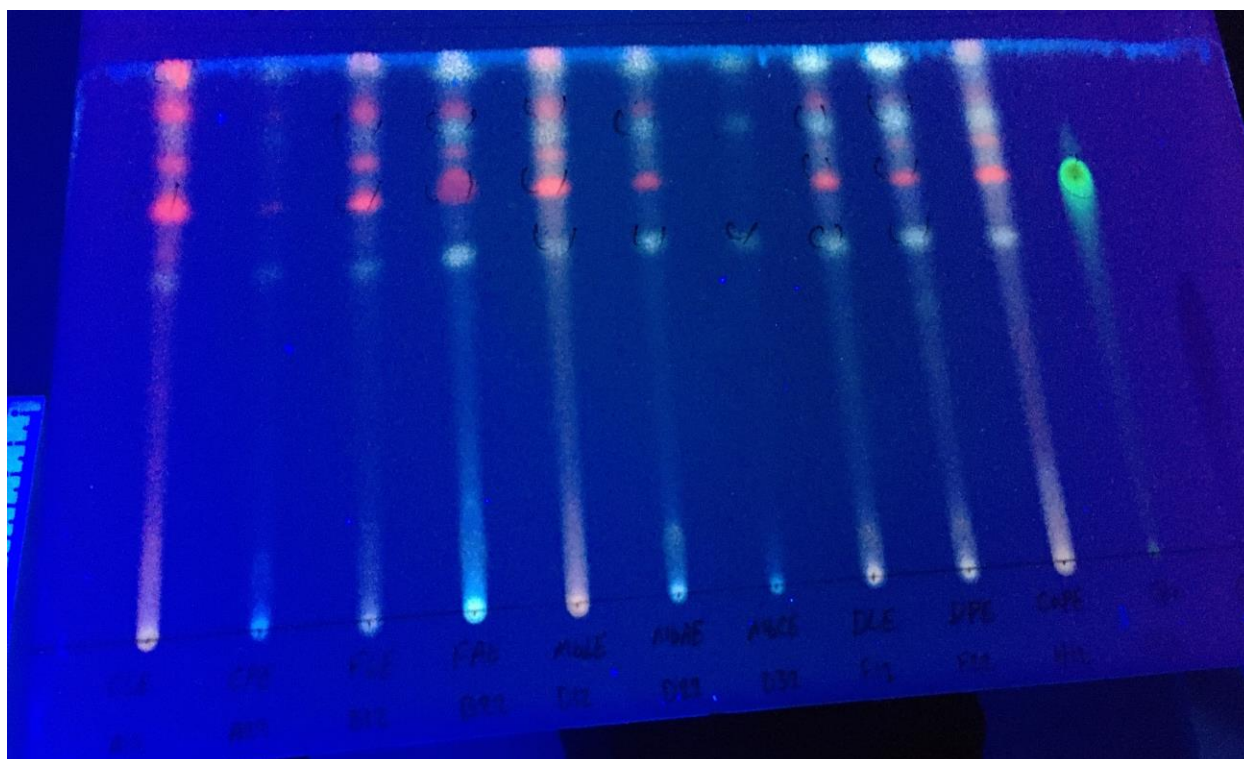

Figure S4 (a): TLC of selected ethanol extracts. Mobile phase-methanol: dichloromethane (1:9. v/v); exposed to UV at 360 nm

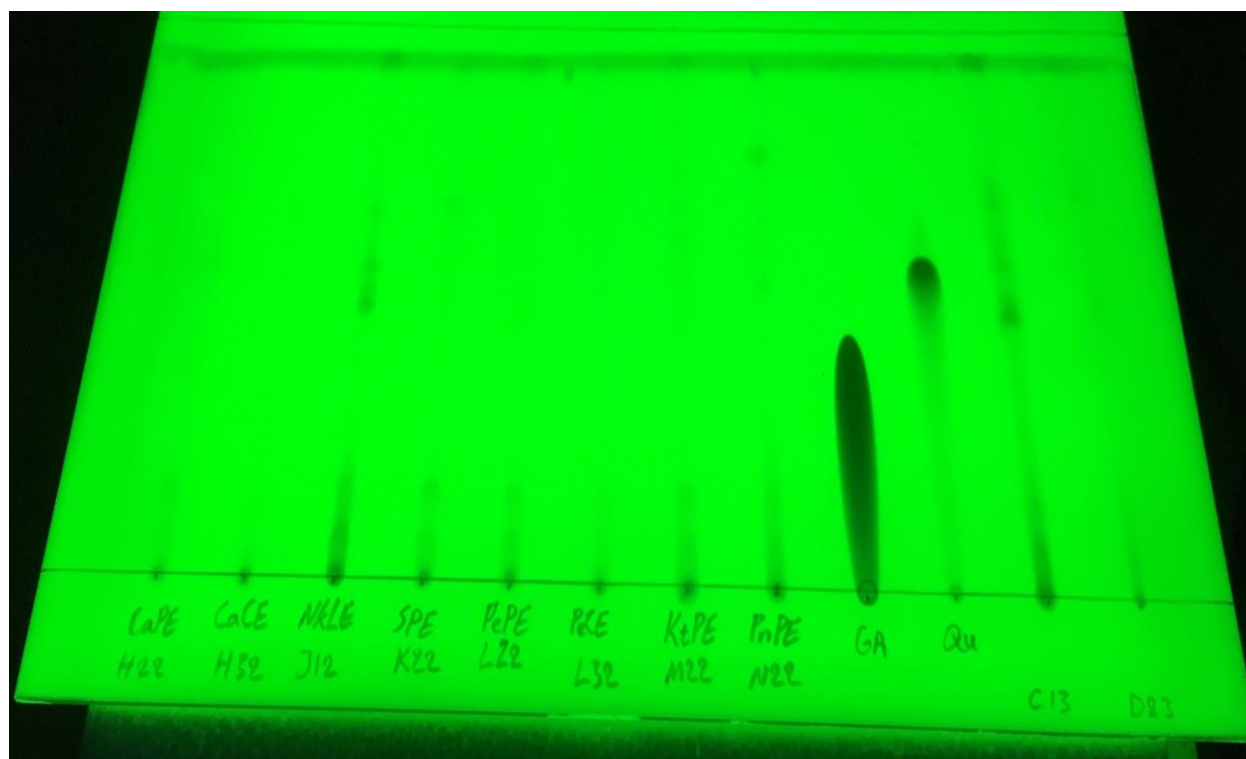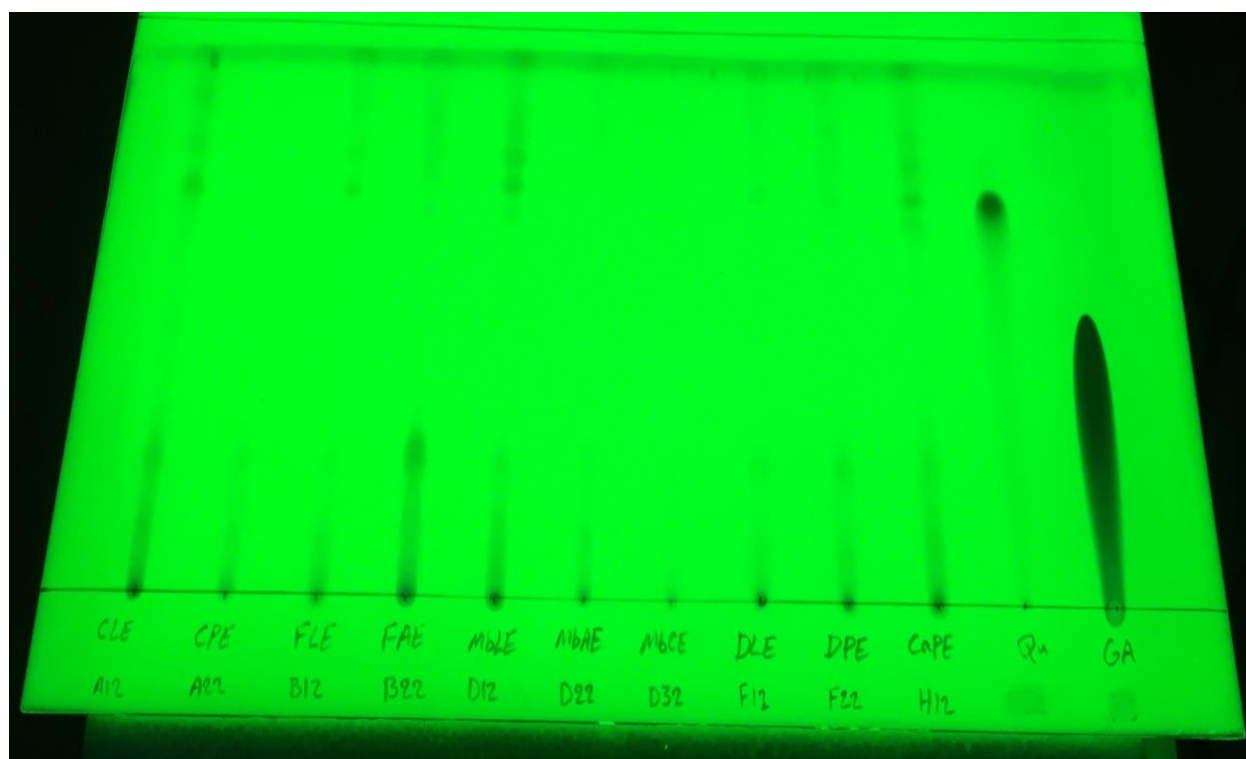

Figure S4 (b): TLC of selected ethanol extracts. Mobile phase-methanol: dichloromethane (1:9, v/v); exposed to UV at 254 nm

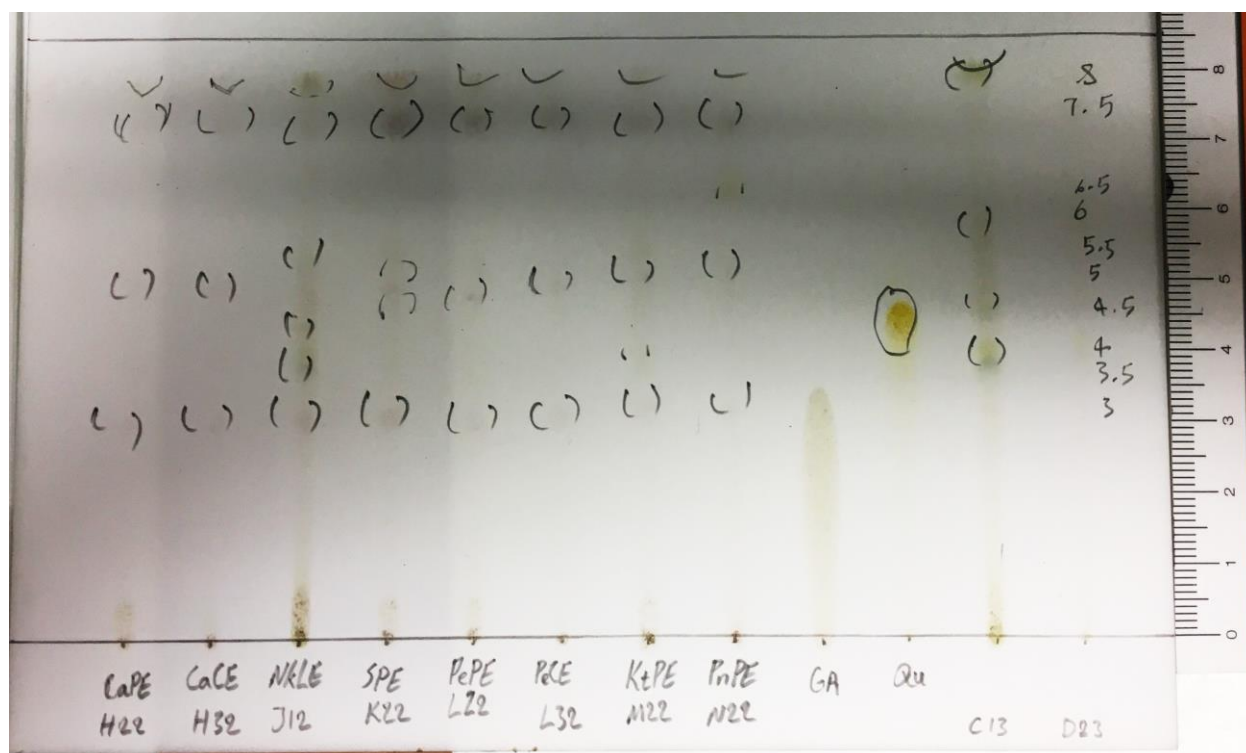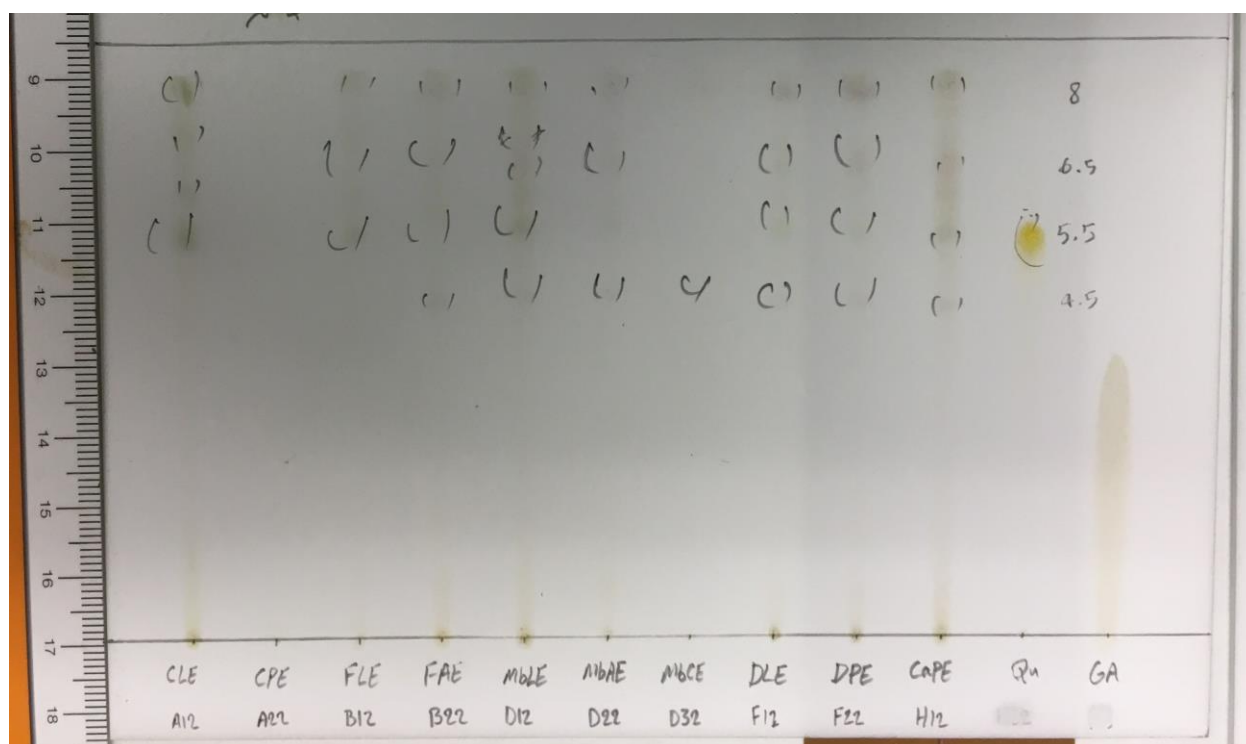

Figure S4 (c): TLC of selected ethanol extracts. Mobile phase-methanol: dichloromethane (1:9. v/v); after spray with 5% sulphuric acid in ethanol

Table S1 (a): R<sub>f</sub> values of TLC spots (top panel, ethanol extracts)

| Extract code,<br>cultivar name,<br>plant part | Ethanol extracts (top panel). Mobile phase- methanol: dichloromethane (1:9) |                                |                                                      |                                       |
|-----------------------------------------------|-----------------------------------------------------------------------------|--------------------------------|------------------------------------------------------|---------------------------------------|
|                                               | R <sub>f</sub> value in<br>254 nm                                           | R <sub>f</sub> value in 360 nm | Appearance after<br>exposure to 5%<br>sulphuric acid | Possible<br>phytochemical<br>group(s) |
| CaPE<br>Cachaco<br>Pseudostem                 | -                                                                           | 0.37-Blue fluorescence         | 0.37-Light green                                     | Saponin                               |
|                                               | -                                                                           | 0.88-Blue fluorescence         | 0.88-Light green                                     | Saponin                               |
|                                               | -                                                                           | 0.95-Blue fluorescence         | 0.95- Light green                                    | Saponin                               |
| CaCE<br>Cachaco<br>Corm                       | -                                                                           | 0.37- Blue fluorescence        | 0.37-Light green                                     | Saponin                               |
|                                               | -                                                                           | 0.67-Light blue                | 0.67-Light green                                     | Saponin                               |
|                                               | -                                                                           | 0.88- Blue fluorescence        | 0.88- Light green                                    | Saponin                               |
|                                               | -                                                                           | 0.95- Blue fluorescence        | 0.95-Light green                                     | Saponin                               |
| NkLE<br>Namwah khom<br>Leaf                   | -                                                                           | 0.37-Light blue                | 0.37- Light green                                    | Saponin                               |
|                                               | -                                                                           | 0.47-Pink                      | 0.47-Light green                                     | Phenolics                             |
|                                               | 0.54-Brown                                                                  | 0.54-Pink                      | 0.54-Light brown                                     | Phenolics                             |
|                                               | -                                                                           | 0.64- Blue fluorescence        | -                                                    | -                                     |
|                                               | 0.75-Brown                                                                  | 0.75-Pink                      | 0.75-Light brown                                     | Phenolics                             |
|                                               | -                                                                           | 0.88-Light blue                | 0.88- Light green                                    | Saponin                               |
|                                               | 0.95-Brown                                                                  | 0.95-Pink                      | 0.95-Light green                                     | Phenolics                             |
| SPE<br>Saba<br>Pseudostem                     | -                                                                           | 0.37-Light blue                | 0.37- Light green                                    | Saponin                               |
|                                               | -                                                                           | 0.47-Pink                      | 0.47-Light green                                     | Phenolics                             |
|                                               | -                                                                           | 0.64- Blue fluorescence        | -                                                    | -                                     |
|                                               | -                                                                           | 0.75- Blue fluorescence        | 0.75-Light brown                                     | Phenolics                             |
|                                               | -                                                                           | 0.88-Bright blue               | 0.88-Brown                                           | Terpenoids                            |
|                                               | -                                                                           | 0.95-Bright blue               | 0.95-Light brown                                     | -                                     |
| PePE<br>Pelipita<br>Pseudostem                | -                                                                           | 0.37-Light blue                | 0.37- Light green                                    | Saponin                               |
|                                               | -                                                                           | 0.47-Pink                      | 0.47-Light green                                     | Phenolics                             |
|                                               | -                                                                           | 0.64- Blue fluorescence        | -                                                    | -                                     |
|                                               | -                                                                           | 0.88-Bright blue               | 0.88-Brown                                           | Terpenoids                            |
|                                               | 0.95-Brown                                                                  | 0.95-Bright blue               | 0.95-Light brown                                     | -                                     |
| PeCE<br>Pepipita<br>Corm                      | -                                                                           | 0.37-Light blue                | 0.37- Light green                                    | Saponin                               |
|                                               | -                                                                           | 0.64- Blue fluorescence        | -                                                    | -                                     |
|                                               | -                                                                           | 0.88-Bright blue               | 0.88-Brown                                           | Terpenoids                            |
|                                               | -                                                                           | 0.95-Bright blue               | 0.95-Light brown                                     | -                                     |
| KtPE<br>Kluai tiparot<br>Pseudostem           | -                                                                           | 0.37-Light blue                | 0.37- Light green                                    | Saponin                               |
|                                               | -                                                                           | 0.47-Pink                      | 0.47-Light green                                     | Phenolics                             |
|                                               | -                                                                           | 0.54- Blue fluorescence        | -                                                    | -                                     |
|                                               | -                                                                           | 0.64- Blue fluorescence        | -                                                    | -                                     |
|                                               | -                                                                           | 0.75-Pink                      | 0.75-Light brown                                     | Phenolics                             |
|                                               | -                                                                           | 0.88-Bright blue               | 0.88-Brown                                           | Terpenoids                            |
|                                               | -                                                                           | 0.95-Bright blue               | 0.95-Light brown                                     | -                                     |
| PnPE<br>Petit naine<br>Pseudostem             | -                                                                           | 0.37-Light blue                | 0.37- Light green                                    | Saponin                               |
|                                               | -                                                                           | 0.64- Blue fluorescence        | -                                                    | -                                     |
|                                               | 0.88-Brown                                                                  | 0.88-Bright blue               | 0.88-Brown                                           | Terpenoids                            |
|                                               | 0.95-Brown                                                                  | 0.95-Bright blue               | 0.95-Light brown                                     | -                                     |

|             |             |            |            |           |
|-------------|-------------|------------|------------|-----------|
| Quercetin   | Quercetin   | 0.68-Brown | 0.68- Pink | Phenolics |
| Gallic acid | Gallic acid | 0.37-Brown | 0.37-Blue  | Phenolics |

Table S1 (b): R<sub>f</sub> value of TLC spots (bottom panel, ethanol extracts)

| Extract code,<br>cultivar name,<br>plant part | Ethanol extracts (bottom panel). Mobile phase- methanol: dichloromethane (1:9) |                                |                                                      |                                       |
|-----------------------------------------------|--------------------------------------------------------------------------------|--------------------------------|------------------------------------------------------|---------------------------------------|
|                                               | R <sub>f</sub> value in<br>254 nm                                              | R <sub>f</sub> value in 360 nm | Appearance after<br>exposure to 5%<br>sulphuric acid | Possible<br>phytochemical<br>group(s) |
| CLE<br>Cavendish<br>Leaf                      | -                                                                              | 0.67-Light blue                | 0.67-Light green                                     | Saponin                               |
|                                               | 0.75-Brown                                                                     | 0.75-Pink                      | 0.75-Light green                                     | Phenolics                             |
|                                               | 0.81-Brown                                                                     | 0.81-Pink                      | 0.81-Green                                           | Phenolics                             |
|                                               | 0.91-Brown                                                                     | 0.91-Pink                      | 0.91-Green                                           | Phenolics                             |
|                                               | -                                                                              | 0.95-Pink                      | 0.95-Green                                           | Phenolics                             |
| CPE<br>Cavendish<br>Pseudostem                | -                                                                              | 0.67-Light blue                | -                                                    | -                                     |
|                                               | -                                                                              | 0.95-Light blue                | 0.95-Light green                                     | Saponin                               |
| FLE<br>Fougamou<br>Leaf                       | -                                                                              | 0.67-Light blue                | 0.67-Light green                                     | Saponin                               |
|                                               | 0.75-Brown                                                                     | 0.75-Pink                      | 0.75-Light green                                     | Phenolics                             |
|                                               | -                                                                              | 0.81-Pink                      | 0.81-Green                                           | Phenolics                             |
|                                               | -                                                                              | 0.91-Pink                      | 0.91-Green                                           | Phenolics                             |
|                                               | -                                                                              | 0.95-Light pink                | 0.95-Green                                           | Phenolics                             |
| FPE<br>Fougamou<br>Pseudostem                 | -                                                                              | 0.67-Light blue                | 0.67-Light green                                     | Saponin                               |
|                                               |                                                                                | 0.75-Pink                      | 0.75-Light green                                     | Phenolics                             |
|                                               |                                                                                | 0.81-Pink                      | 0.81-Green                                           | Phenolics                             |
|                                               |                                                                                | 0.82-Blue                      | -                                                    | -                                     |
|                                               |                                                                                | 0.91-Pink                      | 0.91-Green                                           | Phenolics                             |
| MbLE<br>Mbwazirume<br>Leaf                    | -                                                                              | 0.95- Blue fluorescence        | 0.95-Green                                           | -                                     |
|                                               | 0.67-Brown                                                                     | 0.67-Blue                      | 0.67-Light green                                     | Saponin                               |
|                                               | 0.75-Brown                                                                     | 0.75-Pink                      | 0.75-Light green                                     | Phenolics                             |
|                                               | 0.81- Brown                                                                    | 0.81-Pink                      | 0.81-Green                                           | Phenolics                             |
|                                               | -                                                                              | 0.82-Pale yellow               | -                                                    | -                                     |
| MbPE<br>Mbwazirume<br>Pseudostem              | 0.91- Brown                                                                    | 0.91-Pink                      | 0.91-Green                                           | Phenolics                             |
|                                               | -                                                                              | 0.95- Pink                     | 0.95-Green                                           | -                                     |
|                                               | -                                                                              | 0.67-Blue                      | 0.67-Light green                                     | Saponin                               |
|                                               | -                                                                              | 0.75-Pink                      | 0.75-Light green                                     | Phenolics                             |
| MbCE<br>Mbwazirume<br>Corm                    | -                                                                              | 0.91-Blue                      | 0.91-Green                                           | Saponin                               |
|                                               | -                                                                              | 0.95-Bright blue               | 0.95-Brown                                           | Terpenoids                            |
|                                               | -                                                                              | 0.67-Blue                      | 0.67-Light green                                     | Saponin                               |
|                                               | -                                                                              | 0.91-Blue                      | -                                                    | -                                     |
| DLE<br>Dole<br>Leaf                           | -                                                                              | 0.95-Bright blue               | -                                                    | -                                     |
|                                               | -                                                                              | 0.67-Blue                      | 0.67-Light green                                     | Saponin                               |
|                                               | -                                                                              | 0.75-Pink                      | 0.75-Light green                                     | Phenolics                             |
|                                               | -                                                                              | 0.91-Blue                      | 0.91-Green                                           | Saponin                               |
| DPE                                           | -                                                                              | 0.95-Bright blue               | 0.95-Brown                                           | Terpenoids                            |
|                                               | -                                                                              | 0.67-Blue                      | 0.67-Light green                                     | Saponin                               |

|                               |            |                  |                  |            |
|-------------------------------|------------|------------------|------------------|------------|
| Dole<br>Pseudostem            | -          | 0.75-Pink        | 0.75-Light green | Phenolics  |
|                               | -          | 0.91-Blue        | 0.91-Green       | Saponin    |
|                               | -          | 0.95-Bright blue | 0.95-Brown       | Terpenoids |
| CaPE<br>Cachaco<br>Pseudostem | 0.67-Brown | 0.67-Blue        | 0.67-Light green | Saponin    |
|                               | 0.75-Brown | 0.75-Pink        | 0.75-Light green | Phenolics  |
|                               | 0.81-Brown | 0.81-Pink        | 0.81-Green       | Phenolics  |
|                               | -          | 0.82-Pale yellow | -                | -          |
|                               | 0.91-Brown | 0.91-Pink        | 0.91-Green       | Phenolics  |
| Quercetin                     | 0.68-Brown | 0.68- Pink       | 0.68-Green       | Phenolics  |
| Gallic acid                   | 0.37-Brown | 0.37-Blue        | 0.37-Light brown | Phenolics  |



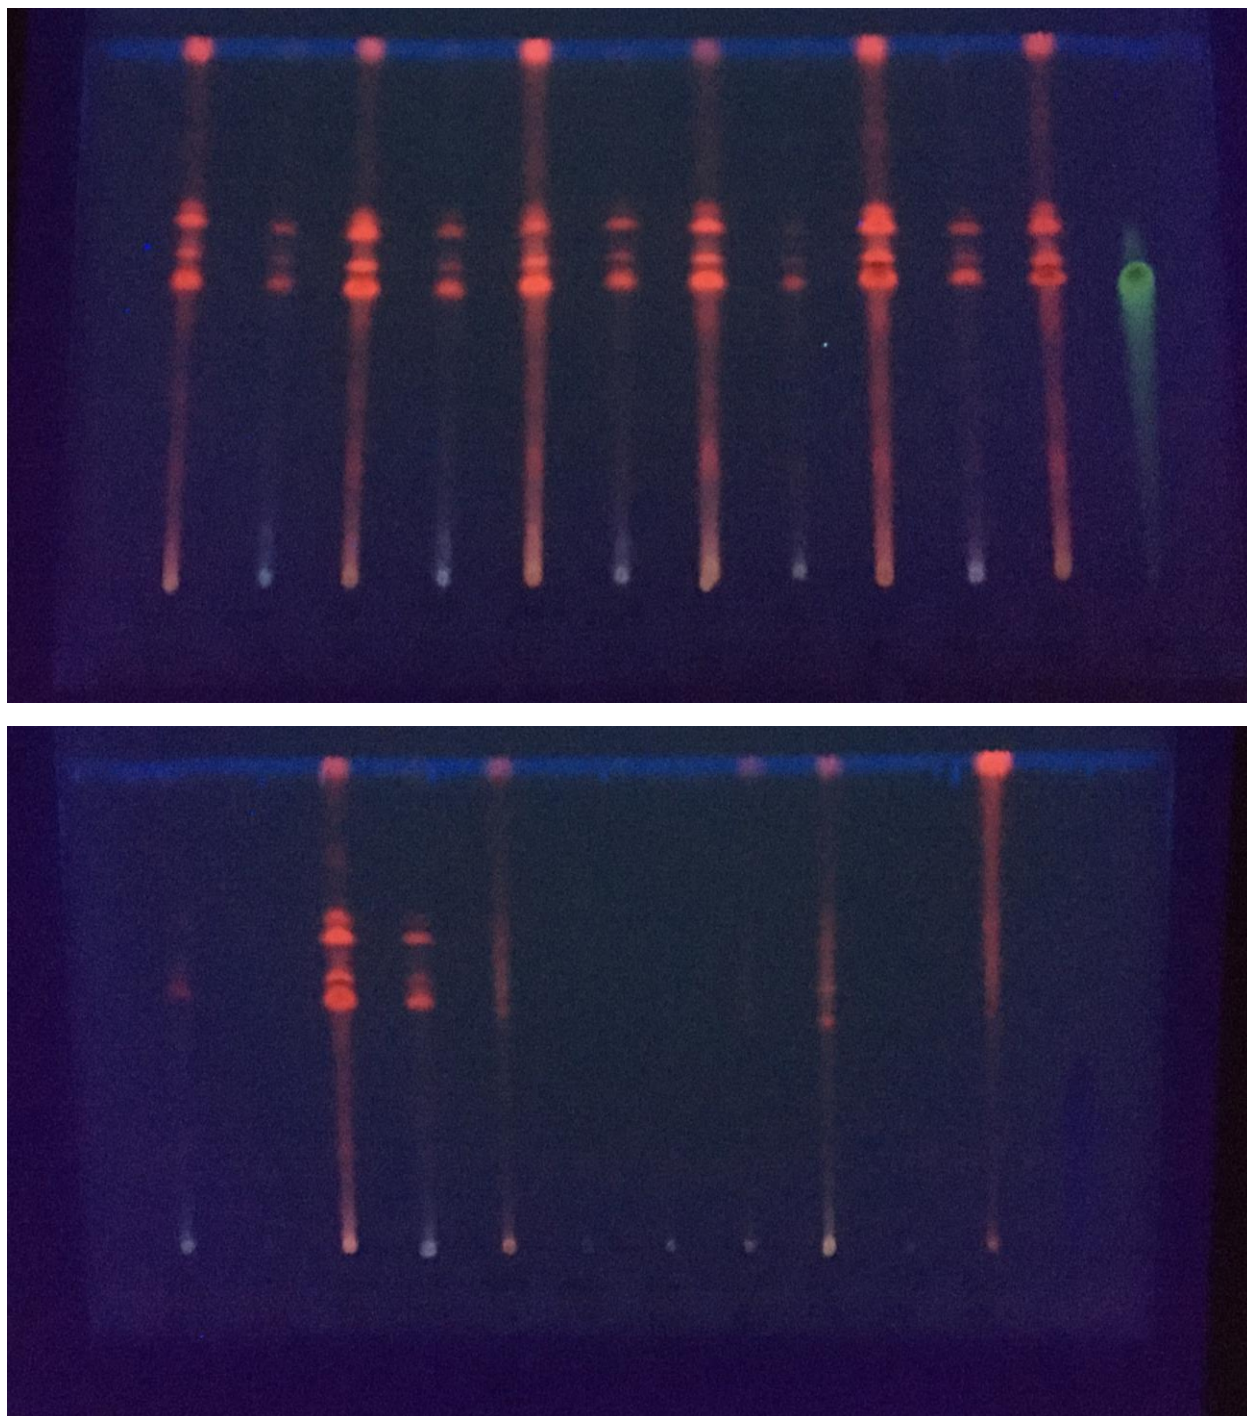

Figure S4 (d): TLC of selected acetone and hexane extracts. Mobile phase-hexane: ethyl acetate (5:5, v/v); exposed to UV at 360 nm



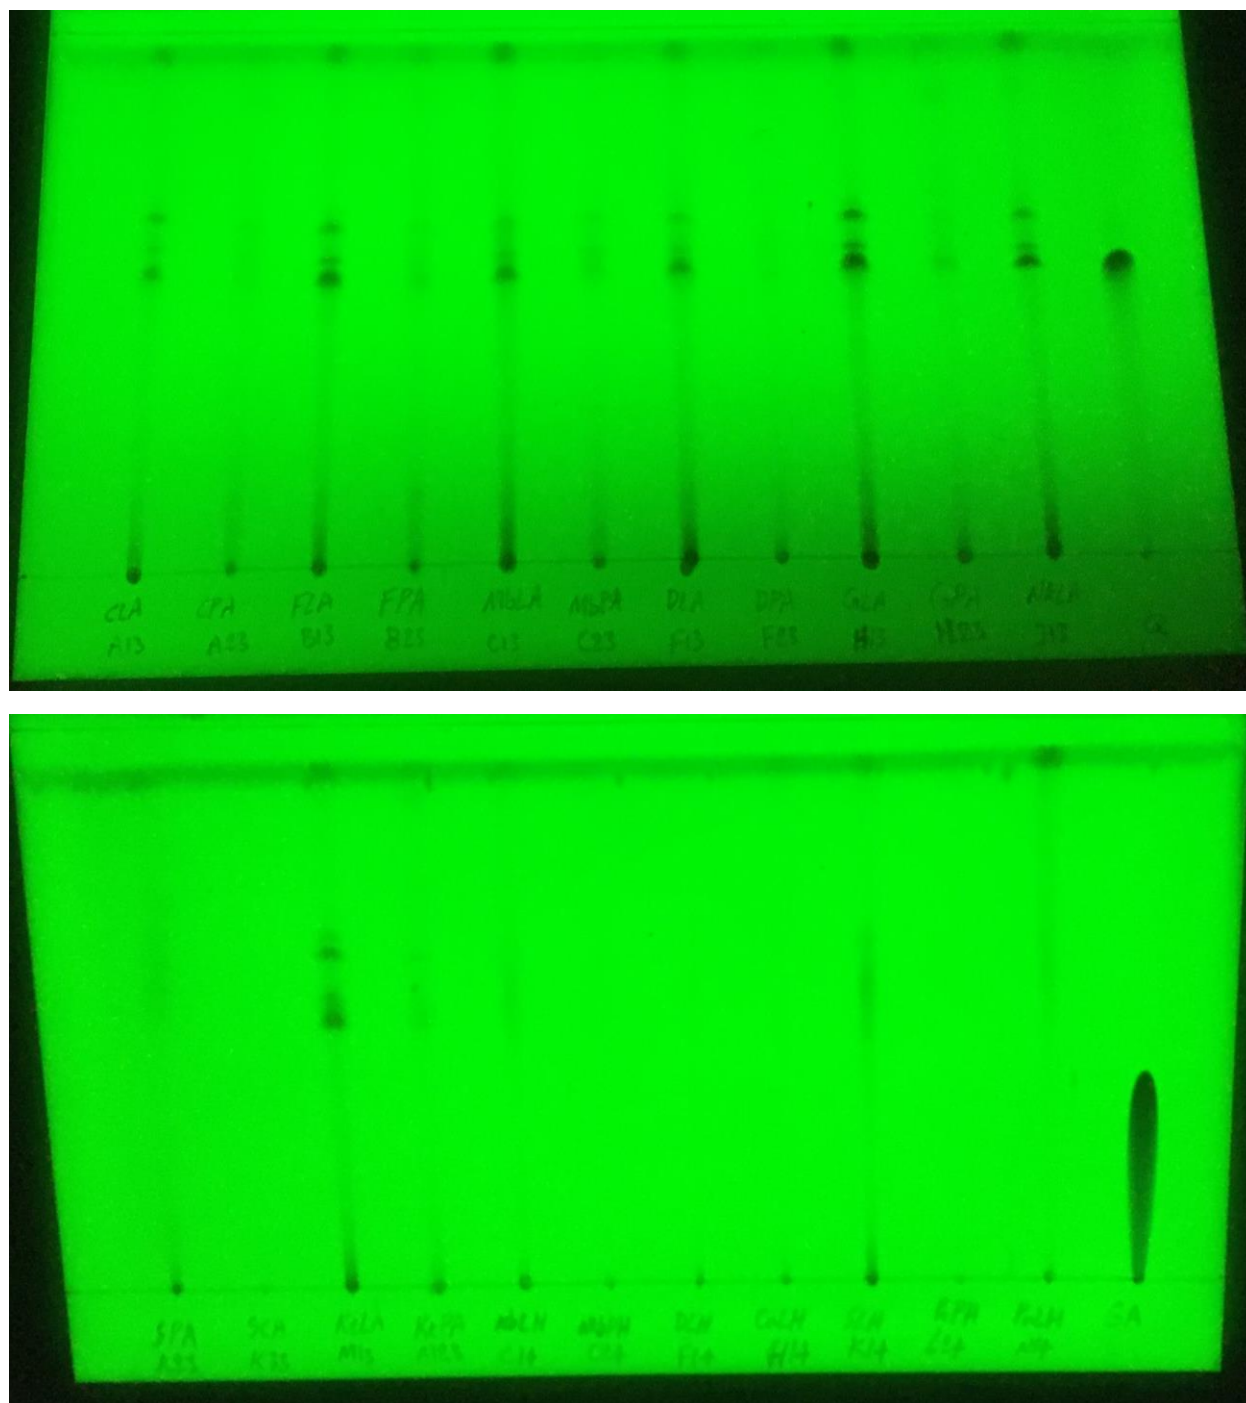

Figure S4 (e): TLC of selected acetone and hexane extracts. Mobile phase-hexane: ethyl-acetate (5:5, v/v); exposed to UV at 254 nm

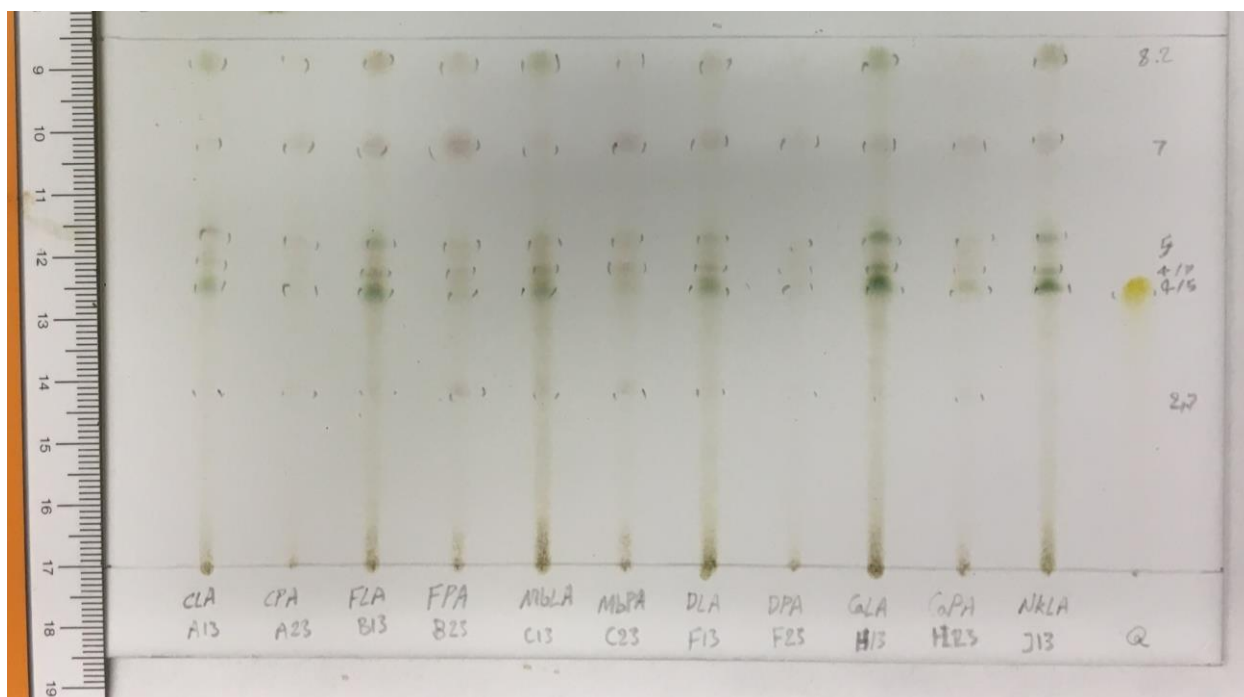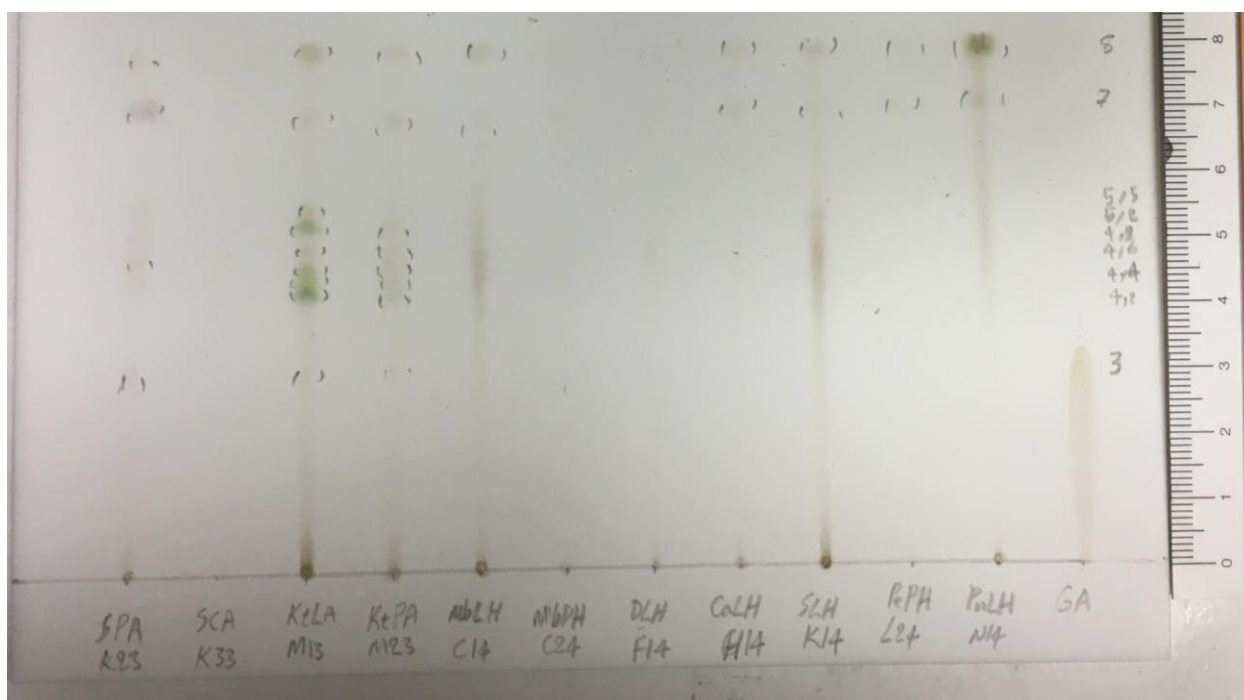

Figure S4 (f): TLC of selected acetone and hexane extracts. Mobile phase-hexane: ethyl acetate (5:5, v/v); after spraying with 5% sulphuric acid in ethanol

Table S1 (c): R<sub>f</sub> value of TLC spots (acetone extracts, top panel)

| Extract code,<br>cultivar name,<br>part(s) | Acetone extracts (top panel). Mobile phase- hexane: ethyl acetate (5:5. v/v) |                                   |                                                      |                                       |
|--------------------------------------------|------------------------------------------------------------------------------|-----------------------------------|------------------------------------------------------|---------------------------------------|
|                                            | R <sub>f</sub> value in 254<br>nm                                            | R <sub>f</sub> value in 360<br>nm | Appearance after<br>exposure to 5%<br>sulphuric acid | Possible<br>phytochemical<br>group(s) |
| CLA<br>Cavendish<br>Leaf                   | 0.54-Brown                                                                   | 0.54-Pink                         | 0.54-Green                                           | Phenolics                             |
|                                            | 0.61-Light brown                                                             | 0.61-Pink                         | 0.61-Green                                           | Phenolics                             |
|                                            | 0.67- Brown                                                                  | 0.67-Pink                         | 0.67-Green                                           | Phenolics                             |
|                                            | -                                                                            | -                                 | 0.87-Light brown                                     | -                                     |
|                                            | 0.95- Brown                                                                  | 0.95-Pink                         | 0.95-Green                                           | Phenolics                             |
| CPA<br>Cavendish<br>Pseudostem             | 0.54-Brown                                                                   | 0.54-Light pink                   | 0.54-Green                                           | Phenolics                             |
|                                            | 0.61-Light brown                                                             | -                                 | 0.61-Green                                           | -                                     |
|                                            | 0.67- Brown                                                                  | 0.67- Light pink                  | 0.67-Green                                           | Phenolics                             |
|                                            | -                                                                            | -                                 | 0.87-Light brown                                     | -                                     |
| FLA<br>Fougamou<br>Leaf                    | 0.54-Brown                                                                   | 0.54-Pink                         | 0.54-Dark green                                      | Phenolics                             |
|                                            | 0.61-Light brown                                                             | 0.61-Pink                         | 0.61-Green                                           | Phenolics                             |
|                                            | 0.67- Brown                                                                  | 0.67-Pink                         | 0.67-Green                                           | Phenolics                             |
|                                            | -                                                                            | -                                 | 0.87-Light brown                                     | -                                     |
|                                            | 0.95- Brown                                                                  | 0.95-Pink                         | 0.95-Green                                           | Phenolics                             |
| FPA<br>Fougamou<br>Pseudostem              | -                                                                            | -                                 | 0.31-Light brown                                     |                                       |
|                                            | 0.54-Light brown                                                             | 0.54-Light pink                   | 0.54-Light green                                     | Phenolics                             |
|                                            | 0.61-Light brown                                                             | -                                 | 0.61-Light green                                     | -                                     |
|                                            | 0.67- Brown                                                                  | 0.67- Light pink                  | 0.67-Light green                                     | Phenolics                             |
|                                            | -                                                                            | -                                 | 0.87-Light brown                                     | -                                     |
|                                            | -                                                                            | -                                 | 0.95-Light brown                                     | -                                     |
| MbLA<br>Mbwarzirume<br>Leaf                | 0.54-Brown                                                                   | 0.54-Pink                         | 0.54-Dark green                                      | Phenolics                             |
|                                            | 0.61-Light brown                                                             | 0.61-Pink                         | 0.61-Green                                           | Phenolics                             |
|                                            | 0.67- Brown                                                                  | 0.67-Pink                         | 0.67-Green                                           | Phenolics                             |
|                                            | -                                                                            | -                                 | 0.87-Light brown                                     | -                                     |
|                                            | 0.95- Brown                                                                  | 0.95-Pink                         | 0.95-Green                                           | Phenolics                             |
| MbPA<br>Mbwarzirume<br>Pseudostem          | -                                                                            | -                                 | 0.31-Light brown                                     |                                       |
|                                            | 0.54-Light brown                                                             | 0.54-Light pink                   | 0.54-Light green                                     | Phenolics                             |
|                                            | 0.61-Light brown                                                             | -                                 | 0.61-Light green                                     | -                                     |
|                                            | 0.67- Brown                                                                  | 0.67- Light pink                  | 0.67-Light green                                     | Phenolics                             |
|                                            | -                                                                            | -                                 | 0.87-Light brown                                     | -                                     |
|                                            | -                                                                            | -                                 | 0.95-Light brown                                     | -                                     |
| DLA<br>Dole<br>Leaf                        | 0.54-Brown                                                                   | 0.54-Pink                         | 0.54-Dark green                                      | Phenolics                             |
|                                            | 0.61-Light brown                                                             | 0.61-Pink                         | 0.61-Green                                           | Phenolics                             |
|                                            | 0.67- Brown                                                                  | 0.67-Pink                         | 0.67-Green                                           | Phenolics                             |
|                                            | -                                                                            | -                                 | 0.87-Light brown                                     | -                                     |
|                                            | 0.95- Brown                                                                  | 0.95-Pink                         | 0.95-Green                                           | Phenolics                             |
| DPA<br>Dole<br>Pseudostem                  | 0.54-Brown                                                                   | 0.54-Light pink                   | 0.54-Green                                           | Phenolics                             |
|                                            | 0.61-Light brown                                                             | -                                 | 0.61-Green                                           | -                                     |
|                                            | 0.67- Brown                                                                  | -                                 | 0.67-Green                                           | Phenolics                             |
| CaLA                                       | 0.54-Brown                                                                   | 0.54-Pink                         | 0.54-Dark green                                      | Phenolics                             |

|                               |                  |                  |                  |           |
|-------------------------------|------------------|------------------|------------------|-----------|
| Cachaco<br>Leaf               | 0.61-Light brown | 0.61-Pink        | 0.61-Green       | Phenolics |
|                               | 0.67- Brown      | 0.67-Pink        | 0.67-Green       | Phenolics |
|                               | -                | -                | 0.87-Light brown | -         |
| CaPA<br>Cachaco<br>Pseudostem | 0.95- Brown      | 0.95-Pink        | 0.95-Green       | Phenolics |
|                               | 0.54-Brown       | 0.54-Light pink  | 0.54-Green       | Phenolics |
|                               | 0.61-Light brown | -                | 0.61-Green       | -         |
|                               | 0.67- Brown      | 0.67- Light pink | 0.67-Green       | Phenolics |
| NkLA<br>Namwah khom<br>Leaf   | -                |                  | 0.87-Light brown | -         |
|                               | 0.54-Brown       | 0.54-Pink        | 0.54-Dark green  | Phenolics |
|                               | 0.61-Light brown | 0.61-Pink        | 0.61-Green       | Phenolics |
|                               | 0.67- Brown      | 0.67-Pink        | 0.67-Green       | Phenolics |
|                               | -                | -                | 0.87-Light brown | -         |
| Quercetin                     | 0.95- Brown      | 0.95-Pink        | 0.95-Green       | Phenolics |
|                               | 0.54-Dark        | 0.54-Green       | 0.54-Yellow      | Phenolics |

Table S1 (d): Rf value of TLC spots (acetone and hexane extracts, bottom panel)

| Extract code,<br>cultivar name,<br>part(s) | Acetone and hexane extracts (bottom panel). Mobile phase- hexane: ethyl acetate (5:5. v/v) |                                |                                                |                                 |
|--------------------------------------------|--------------------------------------------------------------------------------------------|--------------------------------|------------------------------------------------|---------------------------------|
|                                            | R <sub>f</sub> value in 254 nm                                                             | R <sub>f</sub> value in 360 nm | Appearance after exposure to 5% sulphuric acid | Possible phytochemical group(s) |
| SPA<br>Saba<br>Pseudostem                  | -                                                                                          | -                              | 0.57-Light brown                               | -                               |
|                                            | -                                                                                          | 0.61-Light pink                | 0.61-Light brown                               | Phenolics                       |
|                                            | -                                                                                          | -                              | 0.87-Light brown                               | -                               |
|                                            | -                                                                                          | -                              | 0.94-Light brown                               | -                               |
| SCA<br>Saba<br>Corm                        | -                                                                                          | -                              | -                                              | -                               |
|                                            | -                                                                                          | -                              | -                                              | -                               |
|                                            | -                                                                                          | -                              | -                                              | -                               |
| KtLA<br>Kluai tiparot<br>Leaf              | -                                                                                          | -                              | 0.31-Light brown                               | -                               |
|                                            | -                                                                                          | -                              | 0.51-Dark green                                | -                               |
|                                            | 0.57-Derak brown                                                                           | 0.57-Pink                      | 0.57-Light green                               | Phenolics                       |
|                                            | 0.61-Light brown                                                                           | 0.61- Pink                     | 0.61-Light brown                               | -                               |
|                                            | 0.65-Lightbrown                                                                            | 0.65- Pink                     | 0.65-Dark green                                | Phenolics                       |
|                                            | -                                                                                          | 0.67-Pink                      | 0.67-Light green                               | Phenolics                       |
|                                            | -                                                                                          | -                              | 0.87-Light brown                               | -                               |
|                                            | 0.94-Dak brown                                                                             | 0.94-Pink                      | 0.94-Light green                               | -                               |
| KtPA<br>Kluai tiparot<br>Pseudostem        | -                                                                                          | -                              | 0.51-Dark green                                | -                               |
|                                            | 0.57-Derak brown                                                                           | 0.57-Pink                      | 0.57-Light green                               | Phenolics                       |
|                                            | 0.61-Light brown                                                                           | 0.61- Pink                     | 0.61-Light brown                               | -                               |
|                                            | 0.65-Lightbrown                                                                            | 0.65- Pink                     | 0.65-Dark green                                | Phenolics                       |
|                                            | -                                                                                          | -                              | 0.87-Light brown                               | -                               |
|                                            | -                                                                                          | -                              | 0.94-Light green                               | -                               |
| MbLH                                       | 0.61-Dark brown                                                                            | 0.61-Light pink                |                                                | Phenolics                       |

|                       |                  |                 |                  |           |
|-----------------------|------------------|-----------------|------------------|-----------|
| Mbwazirume Leaf       | -                | -               | 0.87-Light brown | -         |
|                       | 0.94-Light green | 0.94-Light pink | 0.94-Light green | Phenolics |
| MbPh                  | -                | -               | -                | -         |
| Mbwazirume Pseudostem | -                | -               | -                | -         |
|                       | -                | -               | -                | -         |
| DLH                   | -                | -               | 0.87-Light brown | -         |
| Dole Leaf             | -                | -               | 0.94-Light green | -         |
|                       | -                | -               | -                | -         |
| CaLH                  | -                | -               | 0.87-Light brown | -         |
| Cachaco Leaf          | -                | 0.94-Light pink | 0.94-Light green | Phenolics |
|                       | -                | -               | -                | -         |
| SLH                   | 0.61-Dark brown  | 0.61-Light pink | -                | Phenolics |
| Saba Leaf             | -                | -               | 0.87-Light brown | -         |
|                       | 0.94-Light green | 0.94-Light pink | 0.94-Light green | Phenolics |
| PePH                  | -                | -               | 0.87-Light brown | -         |
| Pelipita Pseudostem   | -                | -               | 0.94-Light green | -         |
|                       | -                | -               | -                | -         |
| PnLH                  | -                | -               | 0.87-Light brown | -         |
| Petit naine Leaf      | 0.94-Light green | 0.94-Pink       | 0.94-Light green | Phenolics |
|                       | -                | -               | -                | -         |
| Gallic acid           | 0.37-Dark        | 0.37-Blue       | 0.37-Light brown | Phenolic  |

Table S1 (e): Total phenolic content (gallic acid equivalents,  $\mu\text{g}/\text{mg}$ ) of different extracts

| Name            | Leaf |     |     |     | Pseudostem |     |     |    | Corm | Average | St Dev |
|-----------------|------|-----|-----|-----|------------|-----|-----|----|------|---------|--------|
|                 | A    | W   | E   | H   | A          | W   | E   | H  | E    |         |        |
| Dole            | 185  | ND  | 150 | 147 | 160        | ND  | 140 | ND | ND   | 157     | 18     |
| Cachaco         | 246  | ND  | 164 | 181 | 110        | ND  | 150 | ND | 103  | 159     | 53     |
| Saba            | ND   | ND  | ND  | 149 | 180        | ND  | ND  | ND | ND   | 165     | 22     |
| Kluai Tiparot   | 184  | ND  | ND  | ND  | 152        | ND  | 170 | ND | ND   | 169     | 16     |
| Pelipita        | ND   | ND  | ND  | ND  | ND         | ND  | 111 | 73 | 168  | 117     | 48     |
| Namwah Khom     | ND   | 187 | 168 | ND  | ND         | ND  | ND  | ND | ND   | 178     | 13     |
| Fougamou        | 147  | ND  | 24  | ND  | ND         | 129 | 309 | ND | ND   | 152     | 118    |
| Petite naine    | ND   | ND  | ND  | 151 | ND         | ND  | 205 | ND | ND   | 178     | 38     |
| Giant Cavendish | 213  | ND  | 236 | ND  | 77         | ND  | 43  | ND | ND   | 142     | 97     |
| Mbwazirume      | 178  | ND  | 187 | 154 | 136        | ND  | 176 | 73 | ND   | 151     | 42     |

**Note:** The phenolic concentration of extracts was evaluated from a gallic acid calibration curve (shown below), and data are expressed in gallic acid equivalents (GAE) as  $\mu\text{g}/\text{mg}$  of the crude extract. A- Acetone, W-Water, E-Ethanol, H-Hexane, ND-Not determined (because extract showed little antiviral activity, or insufficient sample was left after bioactivity testing).



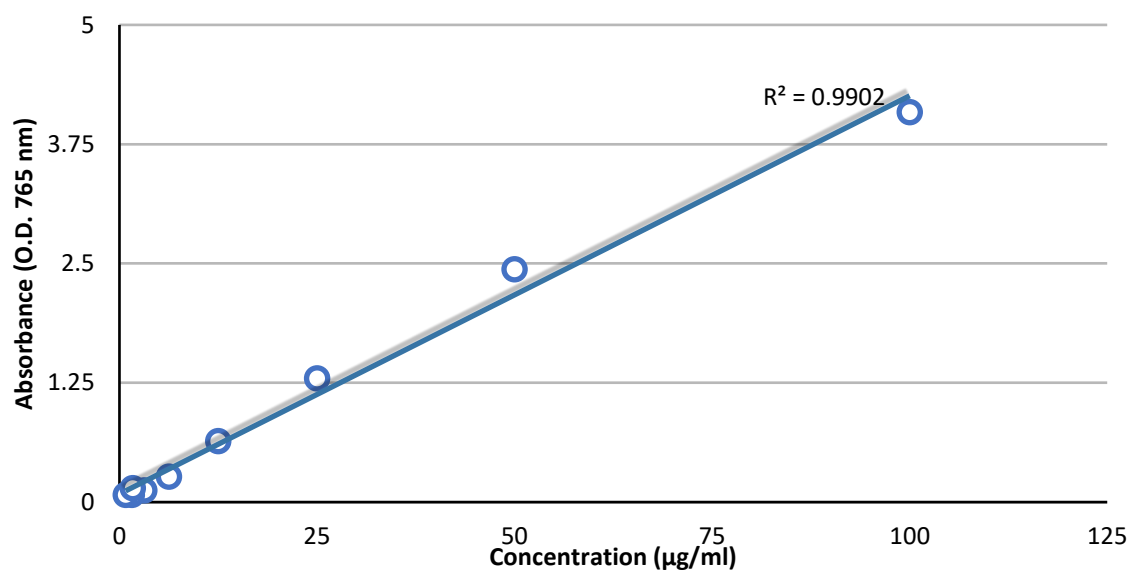

Figure S4 (g): Regression curve for gallic acid assayed with Folin-Ciocalteu reagent (source: <https://doi.org/10.3390/foods9040435>).

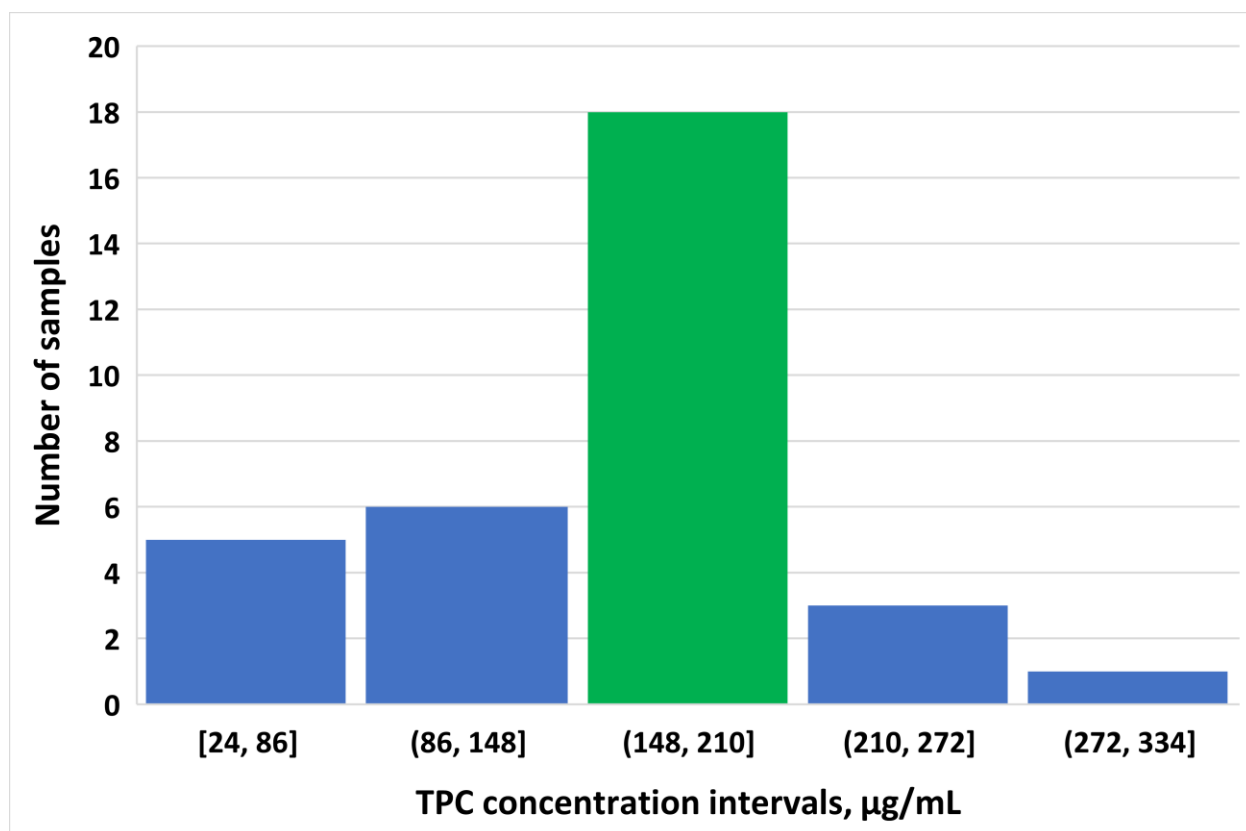

Figure S4 (h): Distribution of total phenolic content across all samples analysed.
