# Supplementary material for: Antiviral and Cytotoxic Activity of Different Plant Parts of Banana (Musa spp.)
Source: MDPI journal article supplement (doi:10.3390/v12050549), 2020-05-15
Supplement: s1 [file s1]

# Antiviral and Cytotoxic Activity of Different Plant Parts of Banana (*Musa* spp.)

**Sujogya Kumar Panda** <sup>1,2,\*</sup>, **Ana Hortência Fonsêca Castro** <sup>1,3</sup>, **Ramin Saleh Jouneghani** <sup>1</sup>,  
**Pieter Leyssen** <sup>4</sup>, **Johan Neyts** <sup>4</sup>, **Rony Swennen** <sup>5,6,7</sup> and **Walter Luyten** <sup>1</sup>

<sup>1</sup> Department of Biology, Katholieke Universiteit Leuven, 3000 Leuven, Belgium;  
acastro905@gmail.com (A.H.F.C.); r.saleh.j@gmail.com (R.S.J.); walter.luyten@kuleuven.be (W.L.)

<sup>2</sup> Mayurbhanj Biological Research (MBR), Bhanjpur, Baripada 757002, Odisha, India

<sup>3</sup> Plant Physiology and Biochemistry, Universidade Federal de São João Del-Rei, Av. Sebastião  
Gonçalves Coelho, 400—Chanandour, Divinópolis MG 35501-296, Brazil

<sup>4</sup> Rega Institute for Medical Research, Laboratory of Virology and Chemotherapy, Katholieke  
Universiteit Leuven, 3000 Leuven, Belgium; pieter.leyssen@kuleuven.be (P.L.);  
johan.neyts@kuleuven.be (J.N.)

<sup>5</sup> International Institute of Tropical Agriculture, Arusha P.O. Box 447, Tanzania;  
rony.swennen@kuleuven.be

<sup>6</sup> Laboratory of Tropical Crop Improvement, Division of Crop Biotechnics, Katholieke Universiteit  
Leuven, 3001 Leuven, Belgium

<sup>7</sup> Bioversity International, 3001 Leuven, Belgium

\* Correspondence: sujogya.panda@kuleuven.be; Tel.: +32-16-373467

## Supplementary material II

Figure S2: Antiviral activity of extracts against Chikungunya virus. Extracts (primary code) tested mentioned under the header compounds in each panel. EC<sub>50</sub> = 50% Effective Concentration (concentration at which 50% inhibition of virus replication is observed); EC<sub>90</sub> = 90% Effective Concentration (concentration at which 90% inhibition of virus replication is observed); CC<sub>50</sub> = 50% Cytostatic/Cytotoxic Concentration (concentration at which 50% adverse effect is observed on Vero cells in parallel with antiviral assay); SI = Selectivity Index (CC<sub>50</sub>/EC<sub>50</sub>); SS = Selectivity Surface (integrated surface delineated by the EC<sub>50</sub> curve, the CC<sub>50</sub> curve and the 50% horizontal); TI = Therapeutic Index (SS × 10logSI); AV-Antiviral; AM-Antimetabolic.

| Compound       | Virus             |         |        | Cell |         | AV Method  |             | AM Method  |             |
|----------------|-------------------|---------|--------|------|---------|------------|-------------|------------|-------------|
| Primary code   | Species           | Type    | Strain | Type | Subtype | Method     | Type        | Method     | Type        |
| BAVAR IE1_0001 | Chikungunya virus | No Type | 899    | Vero | A       | Absorbance | MTS - 498nm | Microscopy | Tox scoring |

Needs more data.

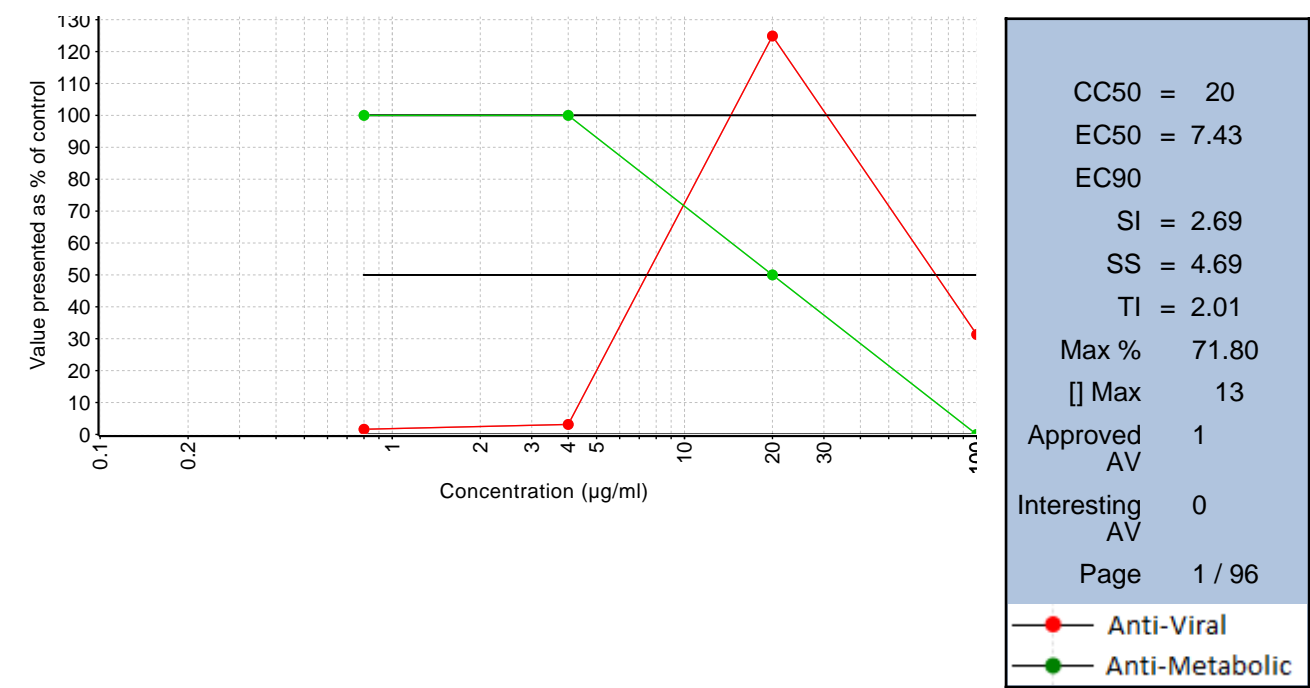

[Export chart data to CSV](#)

| Summary values |        |        |        |
|----------------|--------|--------|--------|
| Statistic      | CC50   | EC50   | EC90   |
| Median         | = 46.3 | = 7.43 | = 12.6 |
| Med.Abs.Dev.   | 26.3   |        |        |
| Mean           | = 46.3 | = 7.43 | = 12.6 |
| Stdev.         | 37.1   |        |        |

| Compound       | Virus             |         |        | Cell |         | AV Method  |             | AM Method  |             |
|----------------|-------------------|---------|--------|------|---------|------------|-------------|------------|-------------|
| Primary code   | Species           | Type    | Strain | Type | Subtype | Method     | Type        | Method     | Type        |
| BAVAR IE1_0002 | Chikungunya virus | No Type | 899    | Vero | A       | Absorbance | MTS - 498nm | Microscopy | Tox scoring |

Needs more data.

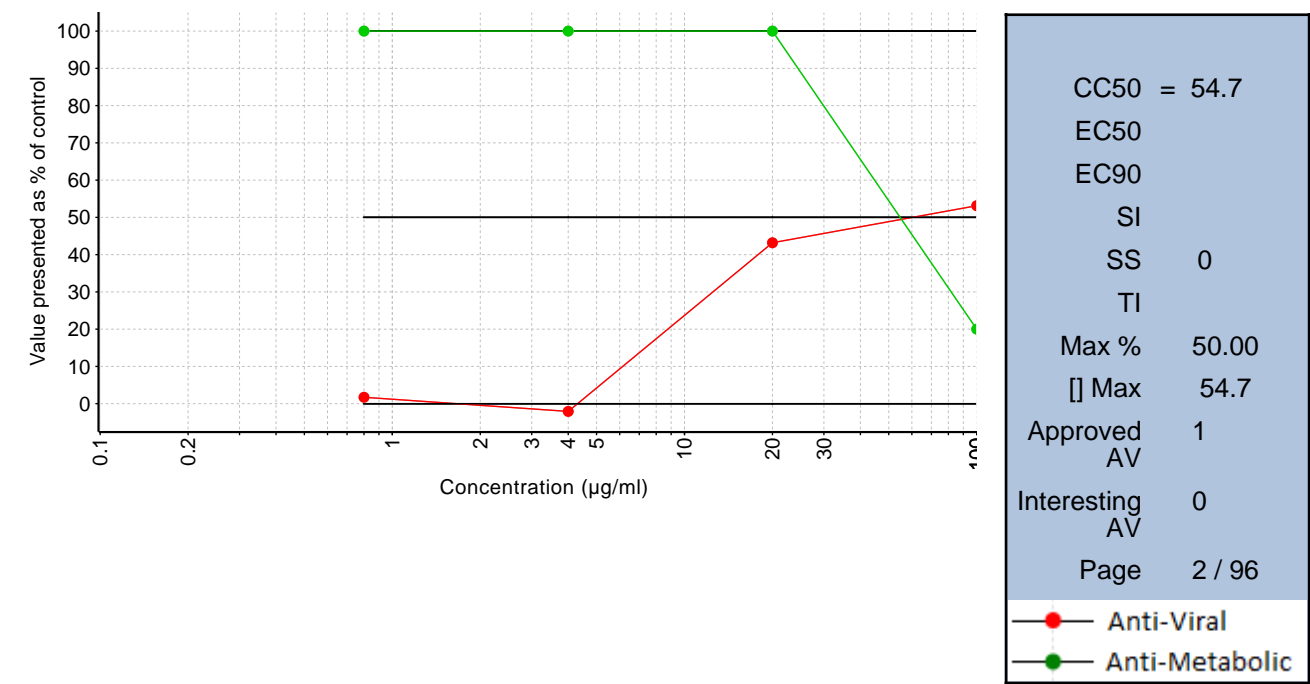

[Export chart data to CSV](#)

| Summary values |        |        |       |
|----------------|--------|--------|-------|
| Statistic      | CC50   | EC50   | EC90  |
| Median         | = 54.7 | = 60.2 | > 100 |
| Med.Abs.Dev.   |        |        |       |
| Mean           | = 54.7 | = 60.2 | > 100 |
| Stdev.         |        |        |       |

| Compound       | Virus             |         |        | Cell |         | AV Method  |             | AM Method  |             |
|----------------|-------------------|---------|--------|------|---------|------------|-------------|------------|-------------|
| Primary code   | Species           | Type    | Strain | Type | Subtype | Method     | Type        | Method     | Type        |
| BAVAR IE1_0003 | Chikungunya virus | No Type | 899    | Vero | A       | Absorbance | MTS - 498nm | Microscopy | Tox scoring |

Needs more data.

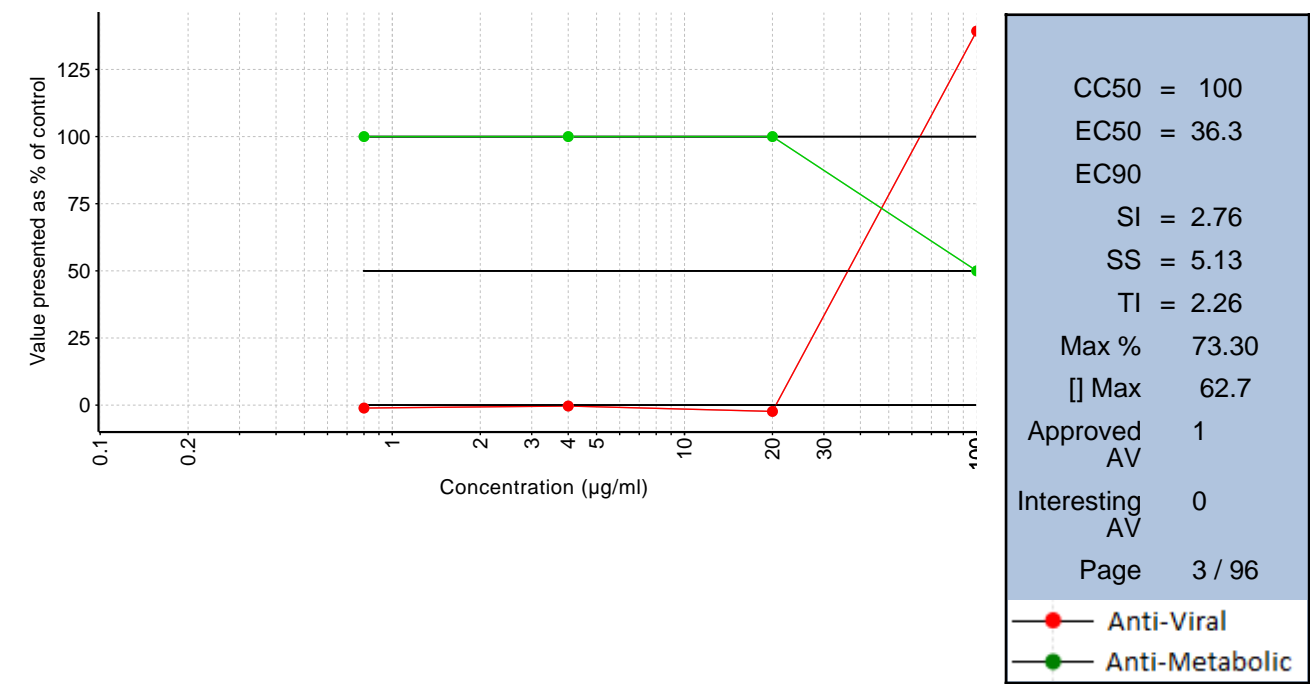

[Export chart data to CSV](#)

| Summary values |       |        |        |
|----------------|-------|--------|--------|
| Statistic      | CC50  | EC50   | EC90   |
| Median         | = 100 | = 36.3 | = 57.1 |
| Med.Abs.Dev.   |       |        |        |
| Mean           | = 100 | = 36.3 | = 57.1 |
| Stdev.         |       |        |        |

| Compound       | Virus             |         |        | Cell |         | AV Method  |             | AM Method  |             |
|----------------|-------------------|---------|--------|------|---------|------------|-------------|------------|-------------|
| Primary code   | Species           | Type    | Strain | Type | Subtype | Method     | Type        | Method     | Type        |
| BAVAR IE1_0004 | Chikungunya virus | No Type | 899    | Vero | A       | Absorbance | MTS - 498nm | Microscopy | Tox scoring |

Needs more data.

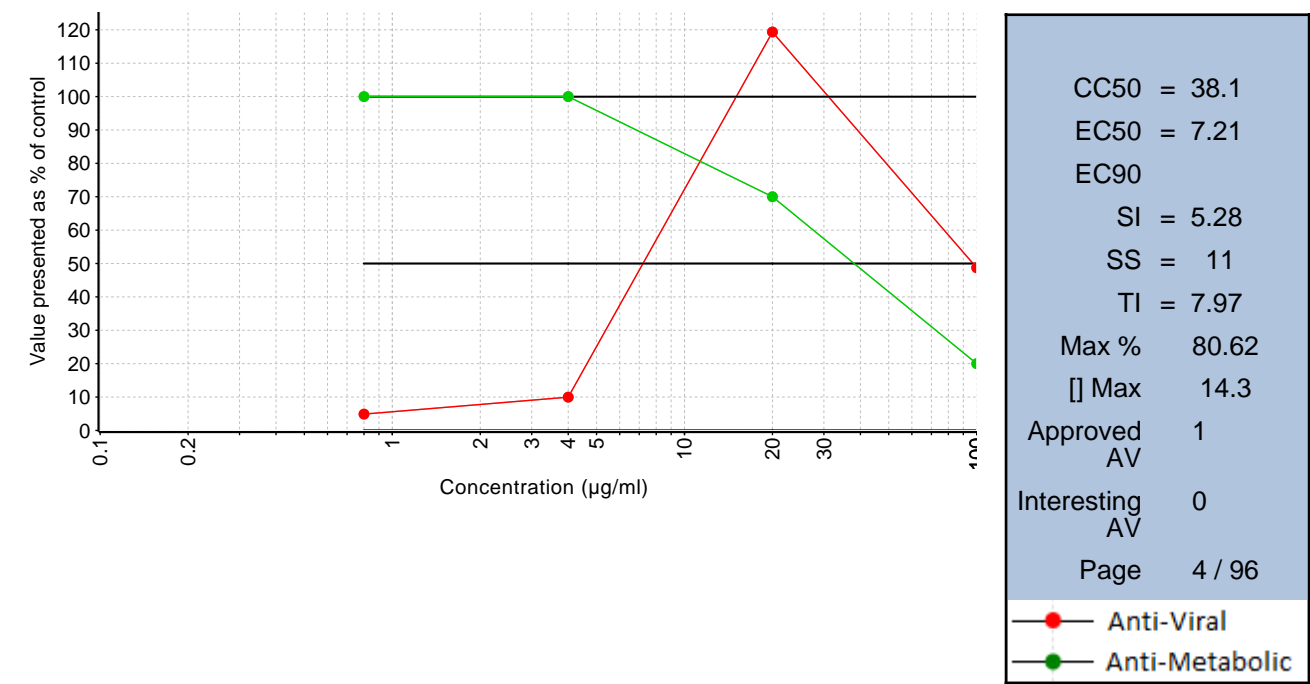

[Export chart data to CSV](#)

| Summary values |        |        |      |
|----------------|--------|--------|------|
| Statistic      | CC50   | EC50   | EC90 |
| Median         | = 67.6 | = 7.21 | = 13 |
| Med.Abs.Dev.   | 29.5   |        |      |
| Mean           | = 67.6 | = 7.21 | = 13 |
| Stdev.         | 41.8   |        |      |

| Compound       | Virus             |         |        | Cell |         | AV Method  |             | AM Method  |             |
|----------------|-------------------|---------|--------|------|---------|------------|-------------|------------|-------------|
| Primary code   | Species           | Type    | Strain | Type | Subtype | Method     | Type        | Method     | Type        |
| BAVAR IE1_0005 | Chikungunya virus | No Type | 899    | Vero | A       | Absorbance | MTS - 498nm | Microscopy | Tox scoring |

Needs more data.

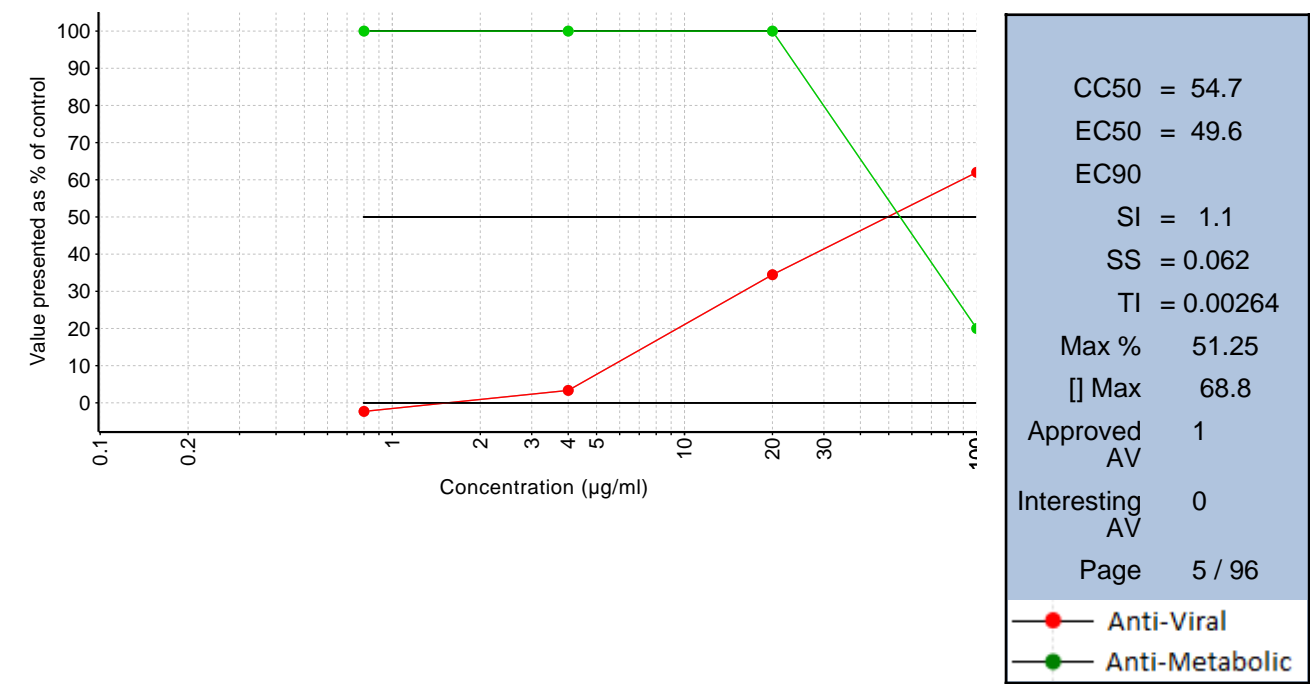

[Export chart data to CSV](#)

| Summary values |        |        |       |
|----------------|--------|--------|-------|
| Statistic      | CC50   | EC50   | EC90  |
| Median         | = 54.7 | = 49.6 | > 100 |
| Med.Abs.Dev.   |        |        |       |
| Mean           | = 54.7 | = 49.6 | > 100 |
| Stdev.         |        |        |       |

| Compound       | Virus             |         |        | Cell |         | AV Method  |             | AM Method  |             |
|----------------|-------------------|---------|--------|------|---------|------------|-------------|------------|-------------|
| Primary code   | Species           | Type    | Strain | Type | Subtype | Method     | Type        | Method     | Type        |
| BAVAR IE1_0006 | Chikungunya virus | No Type | 899    | Vero | A       | Absorbance | MTS - 498nm | Microscopy | Tox scoring |

Needs more data.

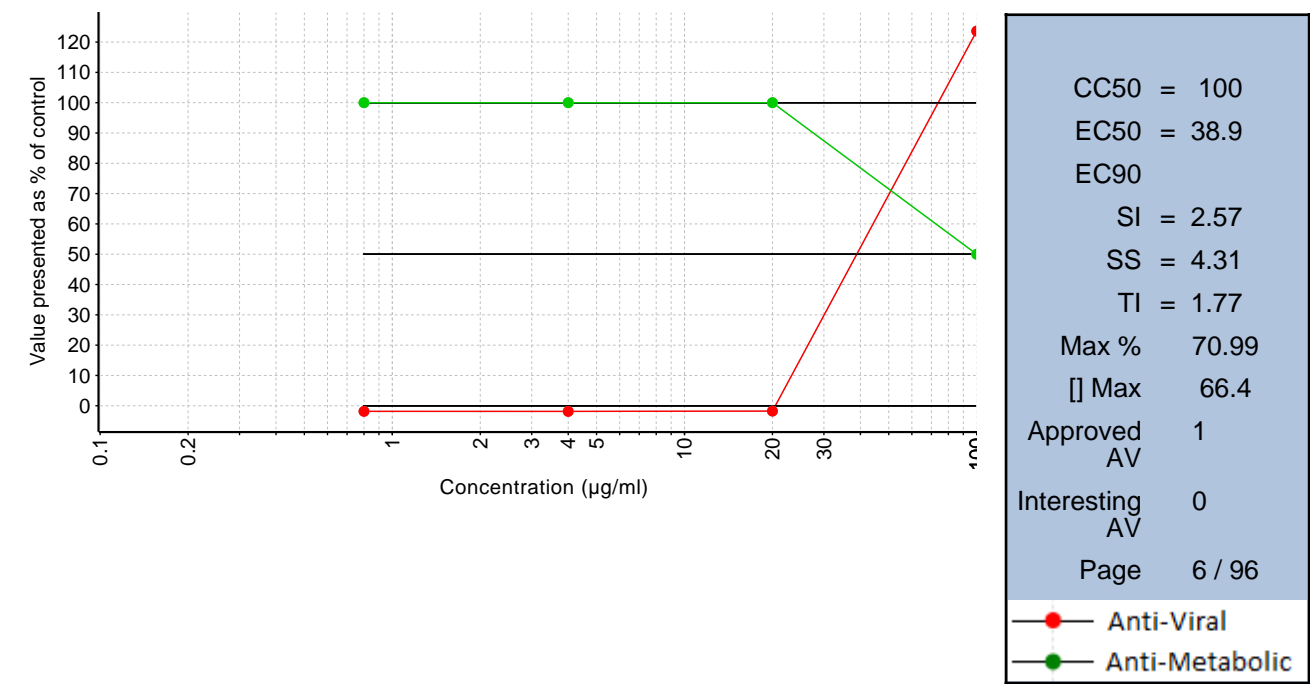

[Export chart data to CSV](#)

| Summary values |       |        |      |
|----------------|-------|--------|------|
| Statistic      | CC50  | EC50   | EC90 |
| Median         | = 100 | = 38.9 | = 65 |
| Med.Abs.Dev.   |       |        |      |
| Mean           | = 100 | = 38.9 | = 65 |
| Stdev.         |       |        |      |

| Compound      | Virus             |         |        | Cell |         | AV Method  |             | AM Method  |             |
|---------------|-------------------|---------|--------|------|---------|------------|-------------|------------|-------------|
| Primary code  | Species           | Type    | Strain | Type | Subtype | Method     | Type        | Method     | Type        |
| BAVAR IE1_007 | Chikungunya virus | No Type | 899    | Vero | A       | Absorbance | MTS - 498nm | Microscopy | Tox scoring |

Needs more data.

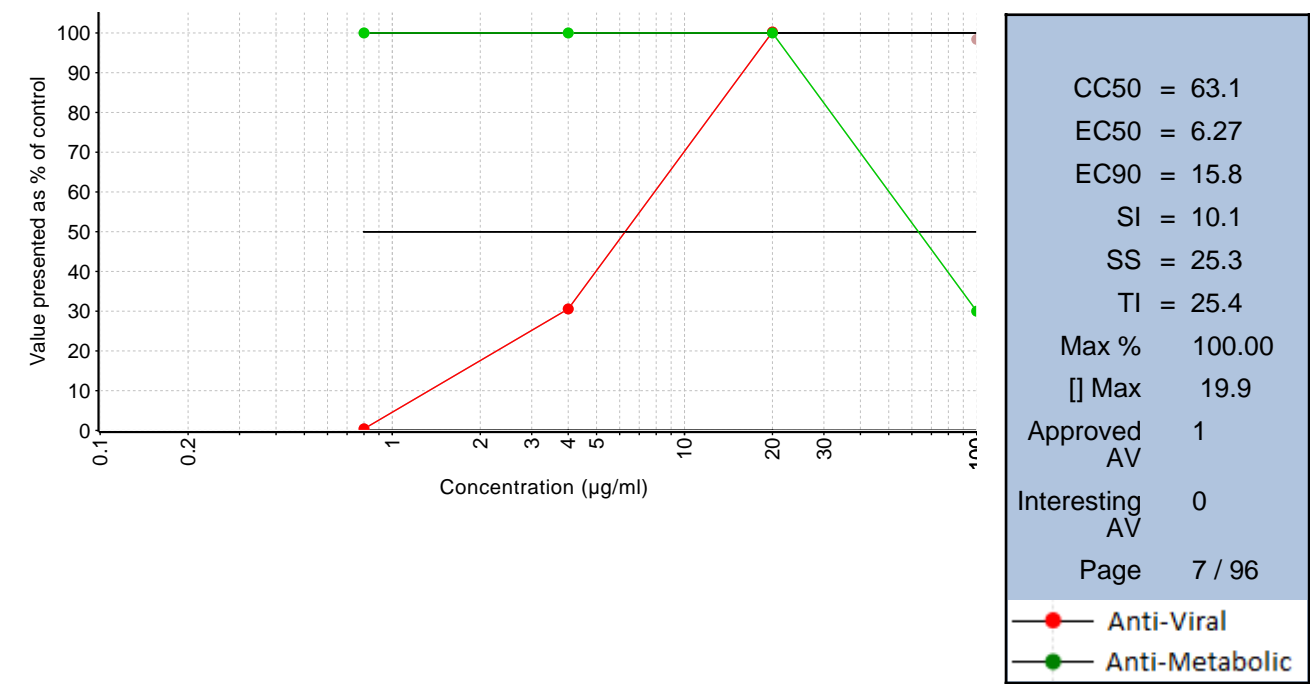

[Export chart data to CSV](#)

| Summary values |        |        |        |
|----------------|--------|--------|--------|
| Statistic      | CC50   | EC50   | EC90   |
| Median         | = 63.1 | = 6.27 | = 15.8 |
| Med.Abs.Dev.   |        |        |        |
| Mean           | = 63.1 | = 6.27 | = 15.8 |
| Stdev.         |        |        |        |



| Compound       | Virus             |         |        | Cell |         | AV Method  |             | AM Method  |             |
|----------------|-------------------|---------|--------|------|---------|------------|-------------|------------|-------------|
| Primary code   | Species           | Type    | Strain | Type | Subtype | Method     | Type        | Method     | Type        |
| BAVAR IE1_0008 | Chikungunya virus | No Type | 899    | Vero | A       | Absorbance | MTS - 498nm | Microscopy | Tox scoring |

Needs more data.

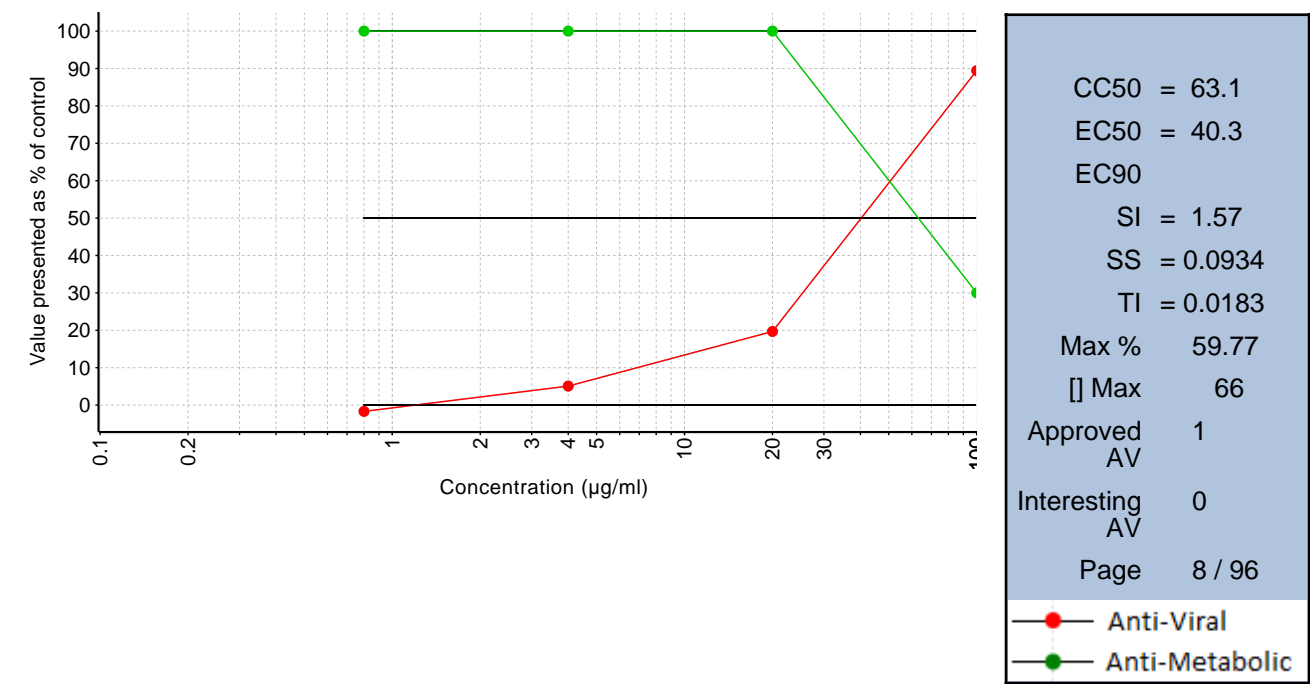

[Export chart data to CSV](#)

| Summary values |        |        |       |
|----------------|--------|--------|-------|
| Statistic      | CC50   | EC50   | EC90  |
| Median         | = 63.1 | = 40.3 | > 100 |
| Med.Abs.Dev.   |        |        |       |
| Mean           | = 63.1 | = 40.3 | > 100 |
| Stdev.         |        |        |       |

| Compound       | Virus             |         |        | Cell |         | AV Method  |             | AM Method  |             |
|----------------|-------------------|---------|--------|------|---------|------------|-------------|------------|-------------|
| Primary code   | Species           | Type    | Strain | Type | Subtype | Method     | Type        | Method     | Type        |
| BAVAR IE1_0009 | Chikungunya virus | No Type | 899    | Vero | A       | Absorbance | MTS - 498nm | Microscopy | Tox scoring |

Needs more data.

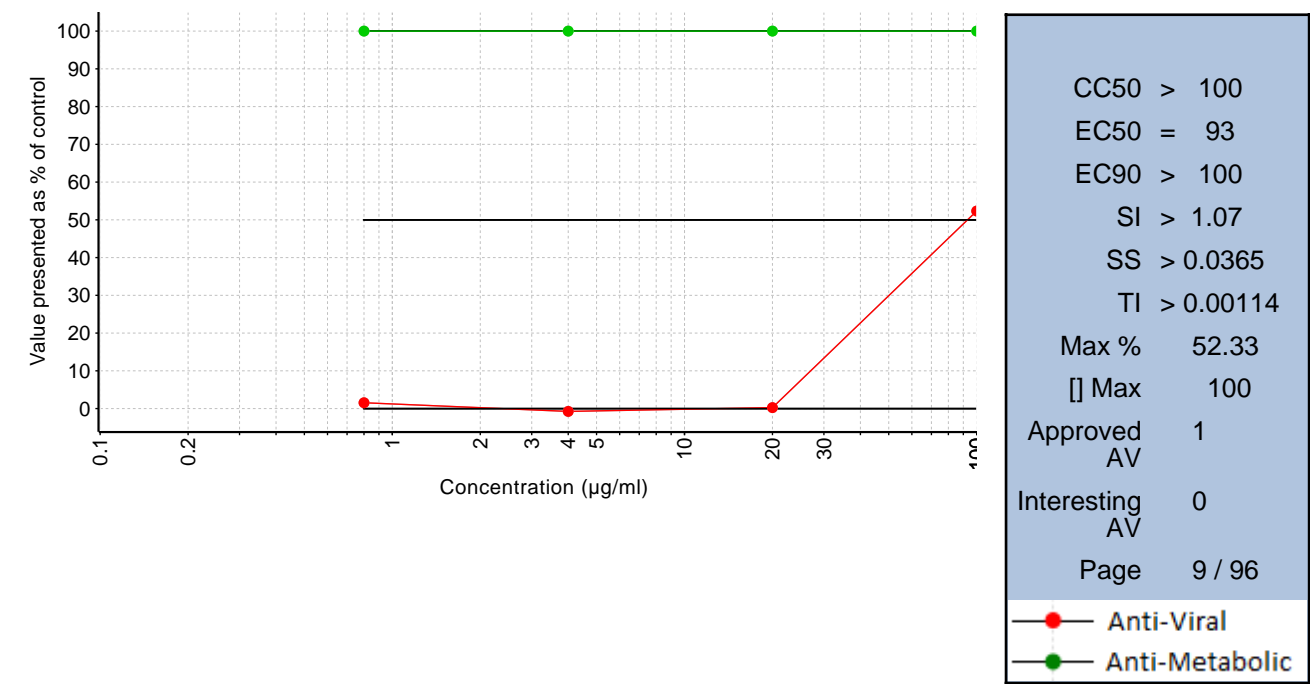

[Export chart data to CSV](#)

| Summary values |       |      |       |
|----------------|-------|------|-------|
| Statistic      | CC50  | EC50 | EC90  |
| Median         | > 100 | = 93 | > 100 |
| Med.Abs.Dev.   |       |      |       |
| Mean           | > 100 | = 93 | > 100 |
| Stdev.         |       |      |       |

| Compound       | Virus             |         |        | Cell |         | AV Method  |             | AM Method  |             |
|----------------|-------------------|---------|--------|------|---------|------------|-------------|------------|-------------|
| Primary code   | Species           | Type    | Strain | Type | Subtype | Method     | Type        | Method     | Type        |
| BAVAR IE1_0010 | Chikungunya virus | No Type | 899    | Vero | A       | Absorbance | MTS - 498nm | Microscopy | Tox scoring |

Needs more data.

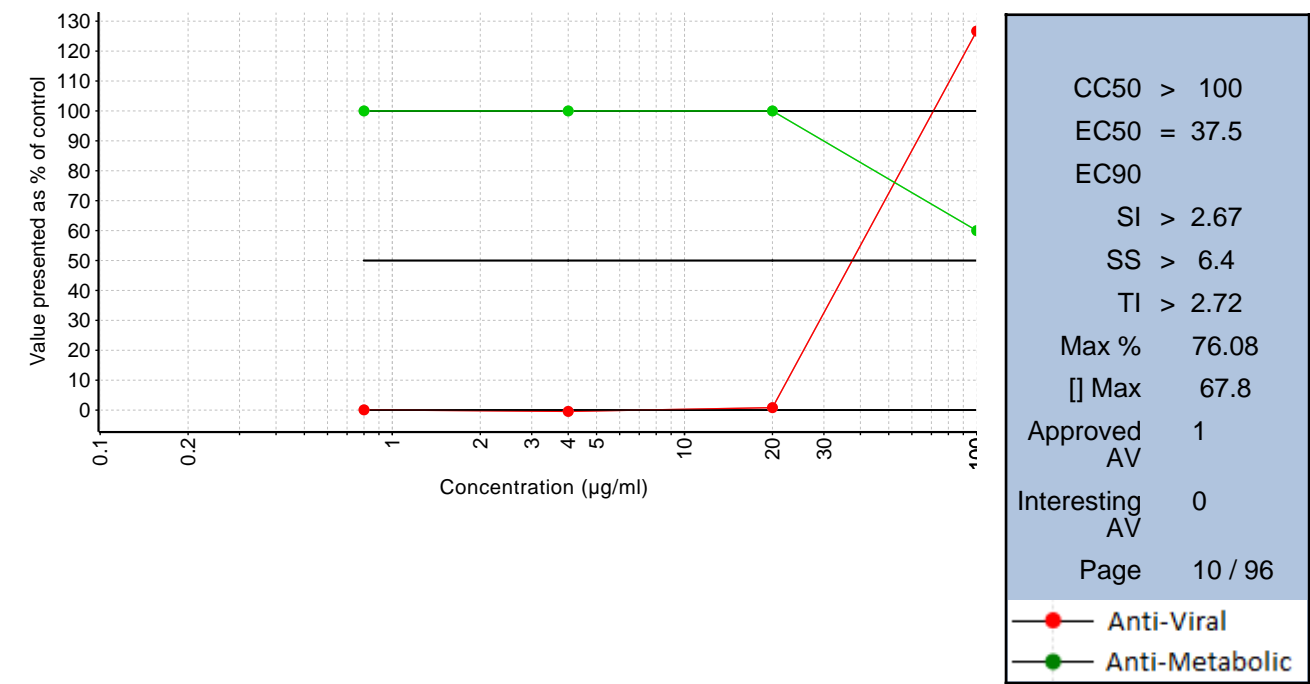

[Export chart data to CSV](#)

| Summary values |       |        |        |
|----------------|-------|--------|--------|
| Statistic      | CC50  | EC50   | EC90   |
| Median         | > 100 | = 37.5 | = 62.6 |
| Med.Abs.Dev.   |       |        |        |
| Mean           | > 100 | = 37.5 | = 62.6 |
| Stdev.         |       |        |        |

| Compound       | Virus             |         |        | Cell |         | AV Method  |             | AM Method  |             |
|----------------|-------------------|---------|--------|------|---------|------------|-------------|------------|-------------|
| Primary code   | Species           | Type    | Strain | Type | Subtype | Method     | Type        | Method     | Type        |
| BAVAR IE1_0011 | Chikungunya virus | No Type | 899    | Vero | A       | Absorbance | MTS - 498nm | Microscopy | Tox scoring |

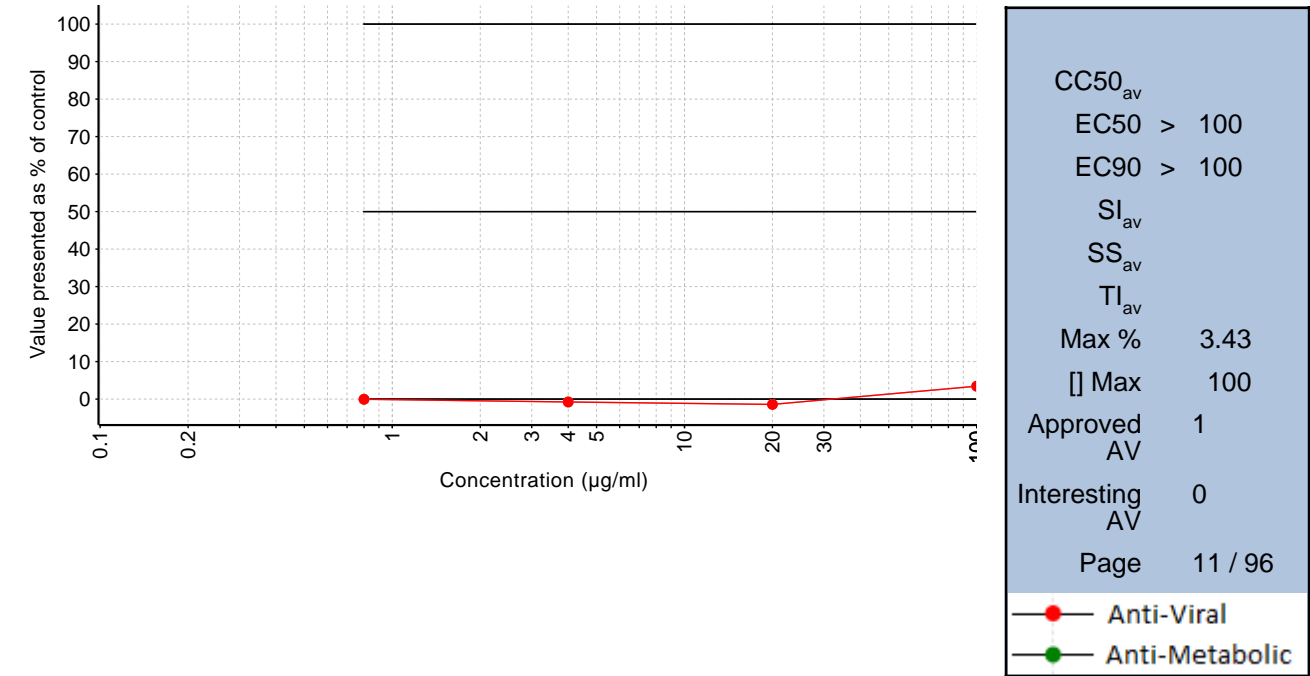

[Export chart data to CSV](#)

| Summary values |      |       |       |
|----------------|------|-------|-------|
| Statistic      | CC50 | EC50  | EC90  |
| Median         |      | > 100 | > 100 |
| Med.Abs.Dev.   |      |       |       |
| Mean           |      | > 100 | > 100 |
| Stdev.         |      |       |       |

| Compound       | Virus             |         |        | Cell |         | AV Method  |             | AM Method  |             |
|----------------|-------------------|---------|--------|------|---------|------------|-------------|------------|-------------|
| Primary code   | Species           | Type    | Strain | Type | Subtype | Method     | Type        | Method     | Type        |
| BAVAR IE1_0012 | Chikungunya virus | No Type | 899    | Vero | A       | Absorbance | MTS - 498nm | Microscopy | Tox scoring |

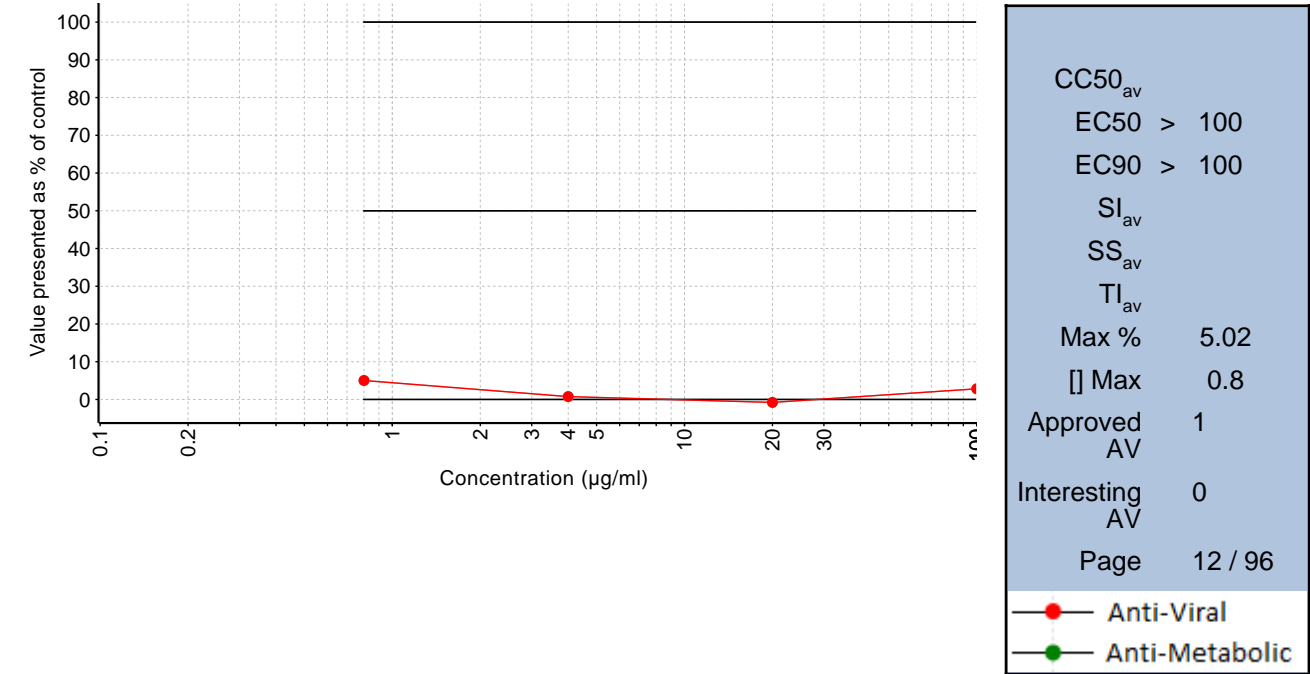

[Export chart data to CSV](#)

| Summary values |      |       |       |
|----------------|------|-------|-------|
| Statistic      | CC50 | EC50  | EC90  |
| Median         |      | > 100 | > 100 |
| Med.Abs.Dev.   |      |       |       |
| Mean           |      | > 100 | > 100 |
| Stdev.         |      |       |       |

| Compound       | Virus             |         |        | Cell |         | AV Method  |             | AM Method  |             |
|----------------|-------------------|---------|--------|------|---------|------------|-------------|------------|-------------|
| Primary code   | Species           | Type    | Strain | Type | Subtype | Method     | Type        | Method     | Type        |
| BAVAR IE1_0013 | Chikungunya virus | No Type | 899    | Vero | A       | Absorbance | MTS - 498nm | Microscopy | Tox scoring |

Needs more data.

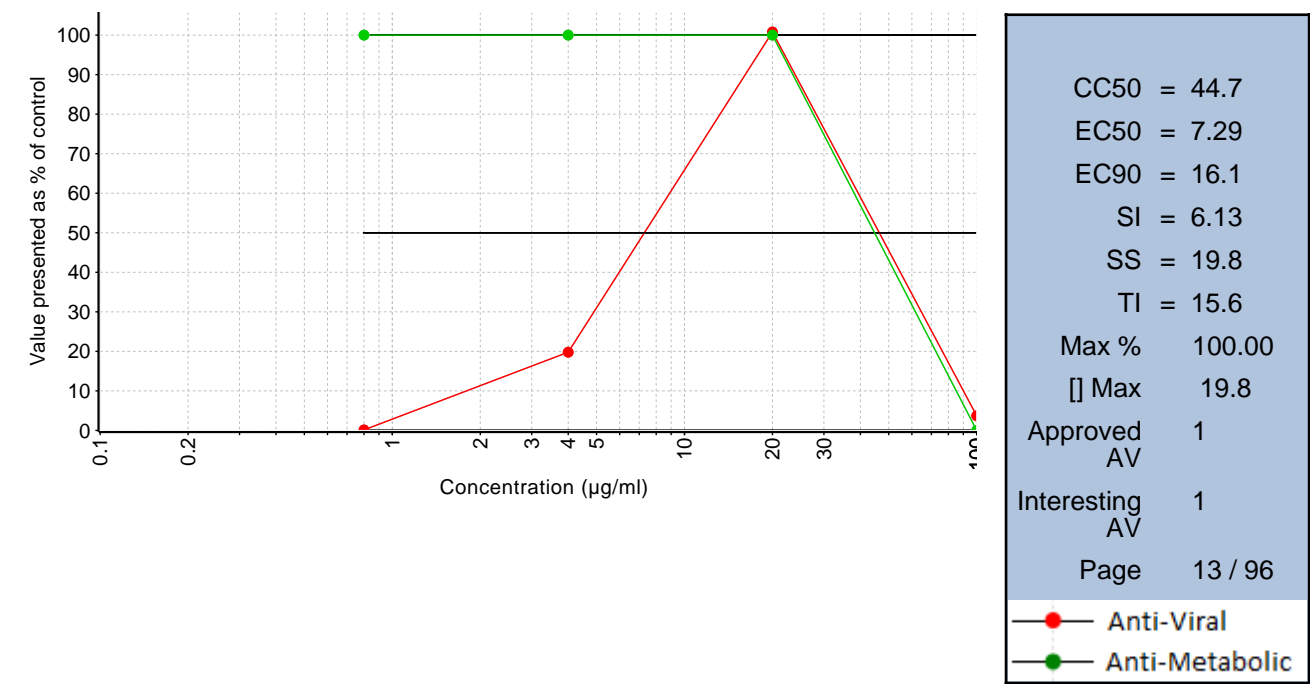

[Export chart data to CSV](#)

| Summary values |        |        |        |
|----------------|--------|--------|--------|
| Statistic      | CC50   | EC50   | EC90   |
| Median         | = 45.6 | = 7.29 | = 16.1 |
| Med.Abs.Dev.   | 0.847  |        |        |
| Mean           | = 45.6 | = 7.29 | = 16.1 |
| Stdev.         | 1.2    |        |        |

| Compound       | Virus             |         |        | Cell |         | AV Method  |             | AM Method  |             |
|----------------|-------------------|---------|--------|------|---------|------------|-------------|------------|-------------|
| Primary code   | Species           | Type    | Strain | Type | Subtype | Method     | Type        | Method     | Type        |
| BAVAR IE1_0014 | Chikungunya virus | No Type | 899    | Vero | A       | Absorbance | MTS - 498nm | Microscopy | Tox scoring |

Needs more data.

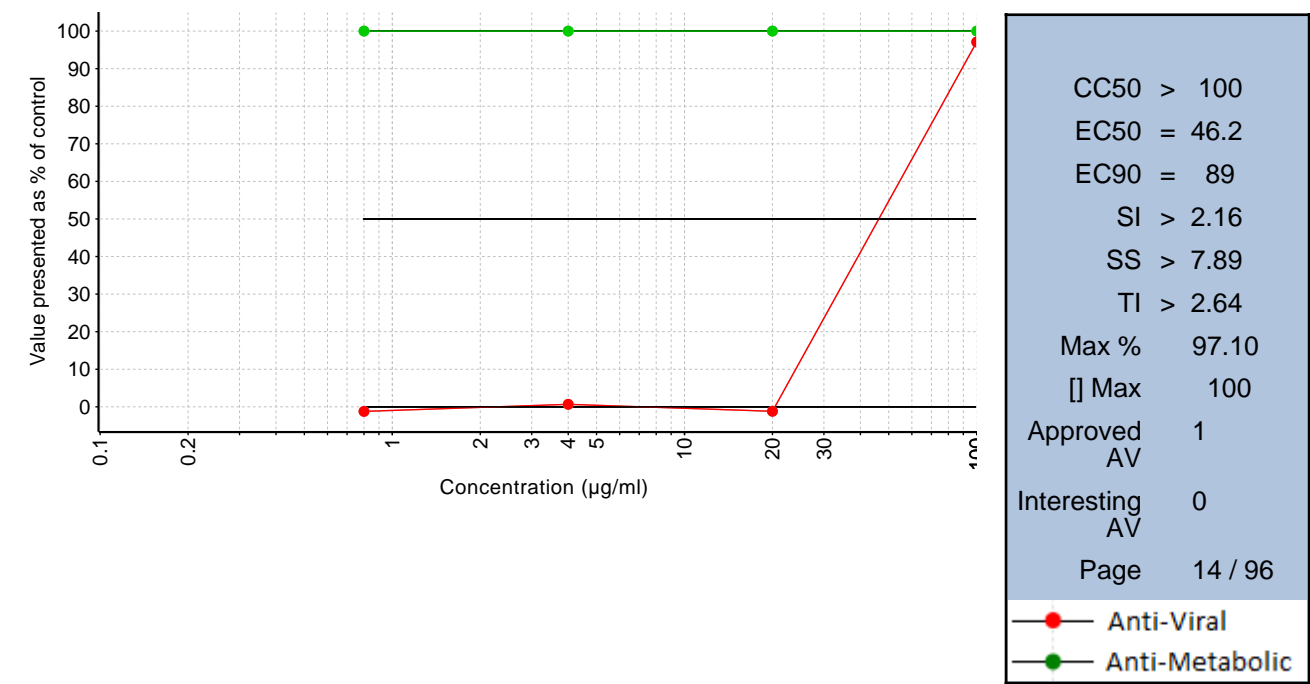

[Export chart data to CSV](#)

| Summary values |       |        |      |
|----------------|-------|--------|------|
| Statistic      | CC50  | EC50   | EC90 |
| Median         | > 100 | = 46.2 | = 89 |
| Med.Abs.Dev.   |       |        |      |
| Mean           | > 100 | = 46.2 | = 89 |
| Stdev.         |       |        |      |

| Compound       | Virus             |         |        | Cell |         | AV Method  |             | AM Method  |             |
|----------------|-------------------|---------|--------|------|---------|------------|-------------|------------|-------------|
| Primary code   | Species           | Type    | Strain | Type | Subtype | Method     | Type        | Method     | Type        |
| BAVAR IE1_0015 | Chikungunya virus | No Type | 899    | Vero | A       | Absorbance | MTS - 498nm | Microscopy | Tox scoring |

Needs more data.

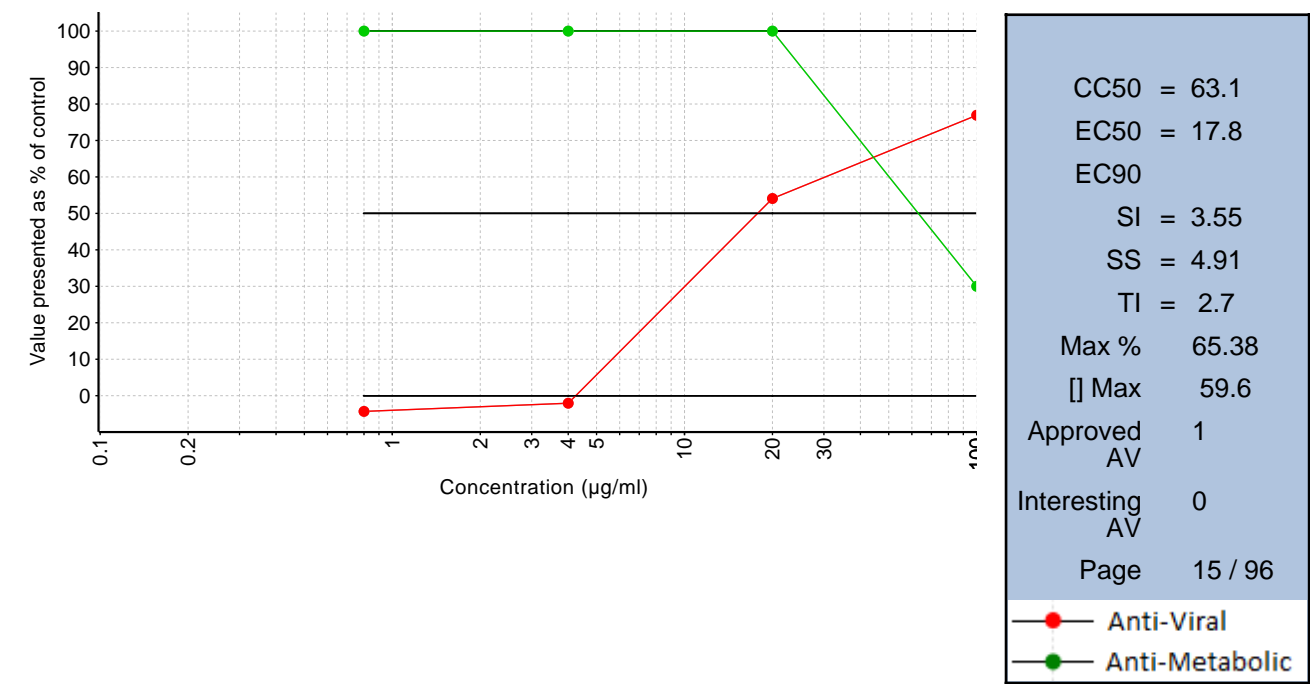

[Export chart data to CSV](#)

| Summary values |        |        |       |
|----------------|--------|--------|-------|
| Statistic      | CC50   | EC50   | EC90  |
| Median         | = 63.1 | = 17.8 | > 100 |
| Med.Abs.Dev.   |        |        |       |
| Mean           | = 63.1 | = 17.8 | > 100 |
| Stdev.         |        |        |       |



| Compound       | Virus             |         |        | Cell |         | AV Method  |             | AM Method  |             |
|----------------|-------------------|---------|--------|------|---------|------------|-------------|------------|-------------|
| Primary code   | Species           | Type    | Strain | Type | Subtype | Method     | Type        | Method     | Type        |
| BAVAR IE1_0016 | Chikungunya virus | No Type | 899    | Vero | A       | Absorbance | MTS - 498nm | Microscopy | Tox scoring |

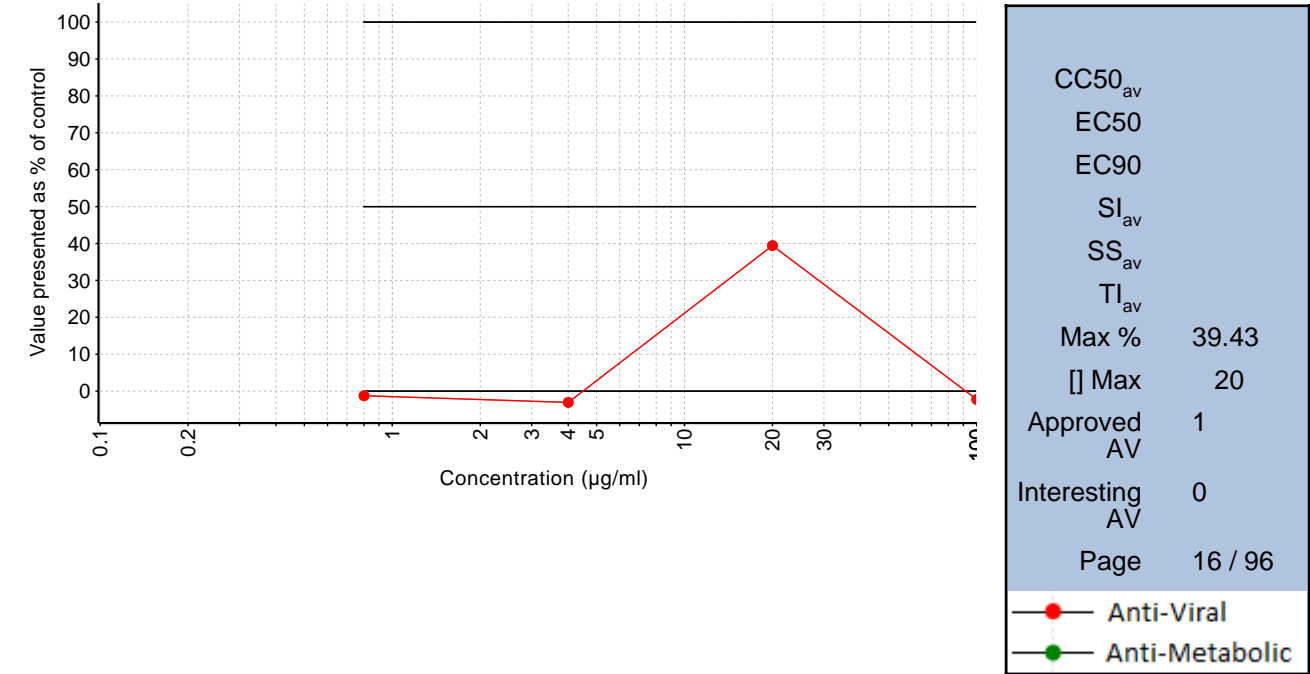

[Export chart data to CSV](#)

| Summary values |      |      |      |
|----------------|------|------|------|
| Statistic      | CC50 | EC50 | EC90 |
| Median         |      |      |      |
| Med.Abs.Dev.   |      |      |      |
| Mean           |      |      |      |
| Stdev.         |      |      |      |

| Compound       | Virus             |         |        | Cell |         | AV Method  |             | AM Method  |             |
|----------------|-------------------|---------|--------|------|---------|------------|-------------|------------|-------------|
| Primary code   | Species           | Type    | Strain | Type | Subtype | Method     | Type        | Method     | Type        |
| BAVAR IE1_0017 | Chikungunya virus | No Type | 899    | Vero | A       | Absorbance | MTS - 498nm | Microscopy | Tox scoring |

Needs more data.

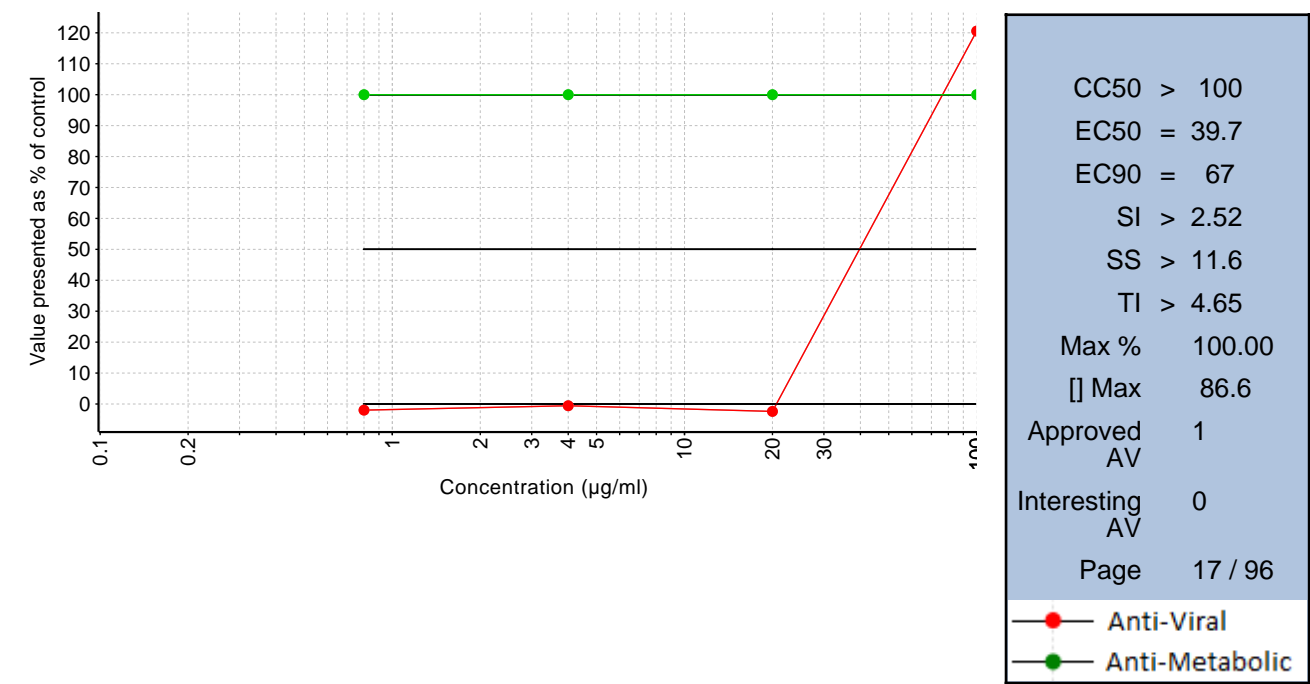

[Export chart data to CSV](#)

| Summary values |       |        |      |
|----------------|-------|--------|------|
| Statistic      | CC50  | EC50   | EC90 |
| Median         | > 100 | = 39.7 | = 67 |
| Med.Abs.Dev.   |       |        |      |
| Mean           | > 100 | = 39.7 | = 67 |
| Stdev.         |       |        |      |

| Compound       | Virus             |         |        | Cell |         | AV Method  |             | AM Method  |             |
|----------------|-------------------|---------|--------|------|---------|------------|-------------|------------|-------------|
| Primary code   | Species           | Type    | Strain | Type | Subtype | Method     | Type        | Method     | Type        |
| BAVAR IE1_0018 | Chikungunya virus | No Type | 899    | Vero | A       | Absorbance | MTS - 498nm | Microscopy | Tox scoring |

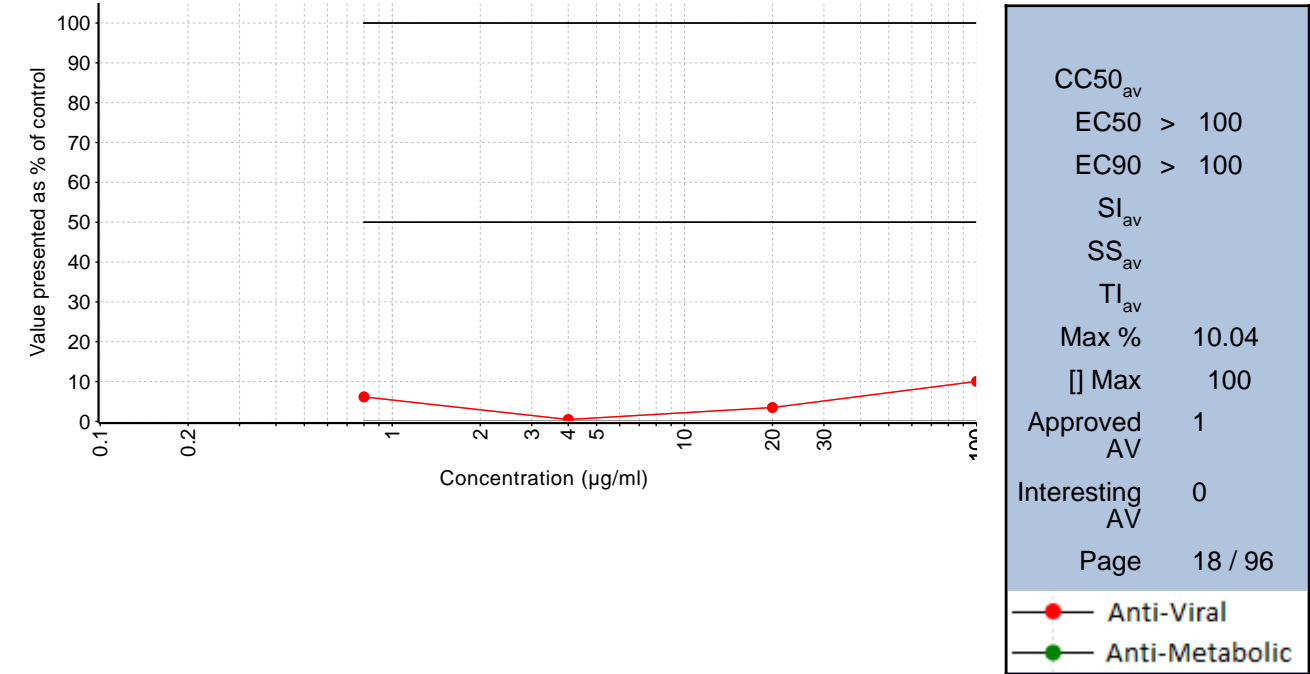

[Export chart data to CSV](#)

| Summary values |      |       |       |
|----------------|------|-------|-------|
| Statistic      | CC50 | EC50  | EC90  |
| Median         |      | > 100 | > 100 |
| Med.Abs.Dev.   |      |       |       |
| Mean           |      | > 100 | > 100 |
| Stdev.         |      |       |       |

| Compound       | Virus             |         |        | Cell |         | AV Method  |             | AM Method  |             |
|----------------|-------------------|---------|--------|------|---------|------------|-------------|------------|-------------|
| Primary code   | Species           | Type    | Strain | Type | Subtype | Method     | Type        | Method     | Type        |
| BAVAR IE1_0019 | Chikungunya virus | No Type | 899    | Vero | A       | Absorbance | MTS - 498nm | Microscopy | Tox scoring |

Needs more data.

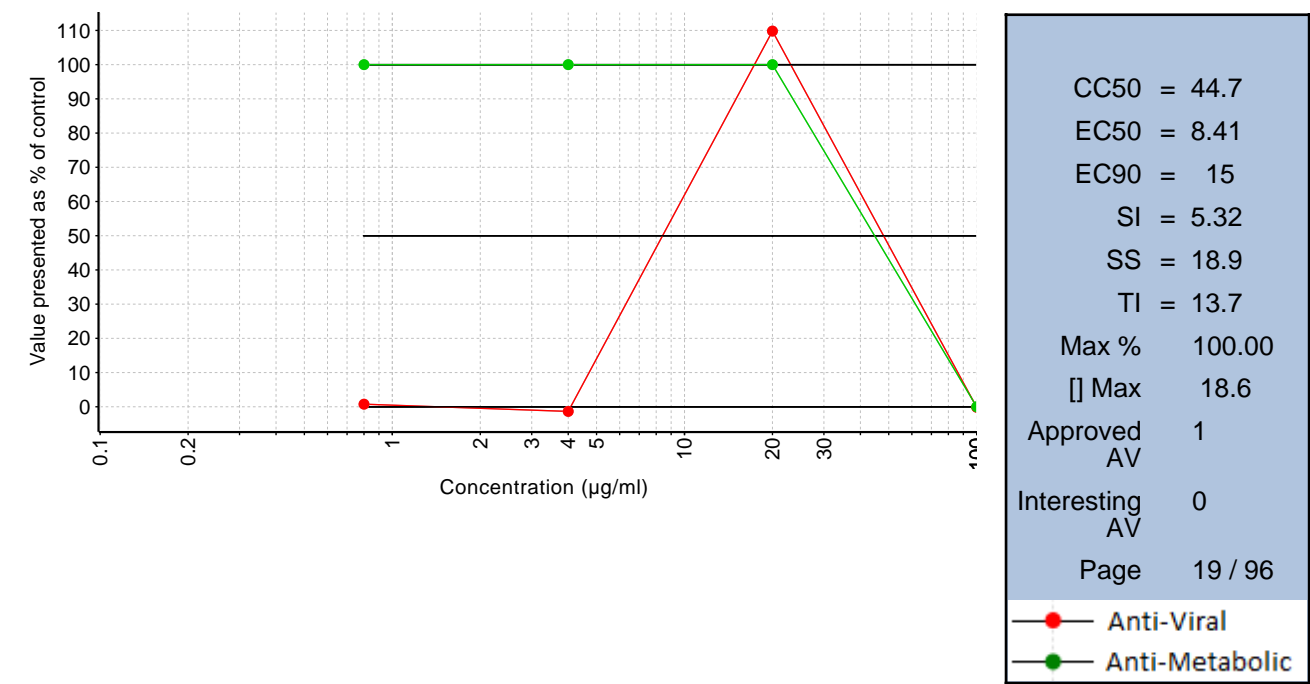

[Export chart data to CSV](#)

| Summary values |        |        |      |
|----------------|--------|--------|------|
| Statistic      | CC50   | EC50   | EC90 |
| Median         | = 46.4 | = 8.41 | = 15 |
| Med.Abs.Dev.   | 1.64   |        |      |
| Mean           | = 46.4 | = 8.41 | = 15 |
| Stdev.         | 2.32   |        |      |

| Compound       | Virus             |         |        | Cell |         | AV Method  |             | AM Method  |             |
|----------------|-------------------|---------|--------|------|---------|------------|-------------|------------|-------------|
| Primary code   | Species           | Type    | Strain | Type | Subtype | Method     | Type        | Method     | Type        |
| BAVAR IE1_0020 | Chikungunya virus | No Type | 899    | Vero | A       | Absorbance | MTS - 498nm | Microscopy | Tox scoring |

Needs more data.

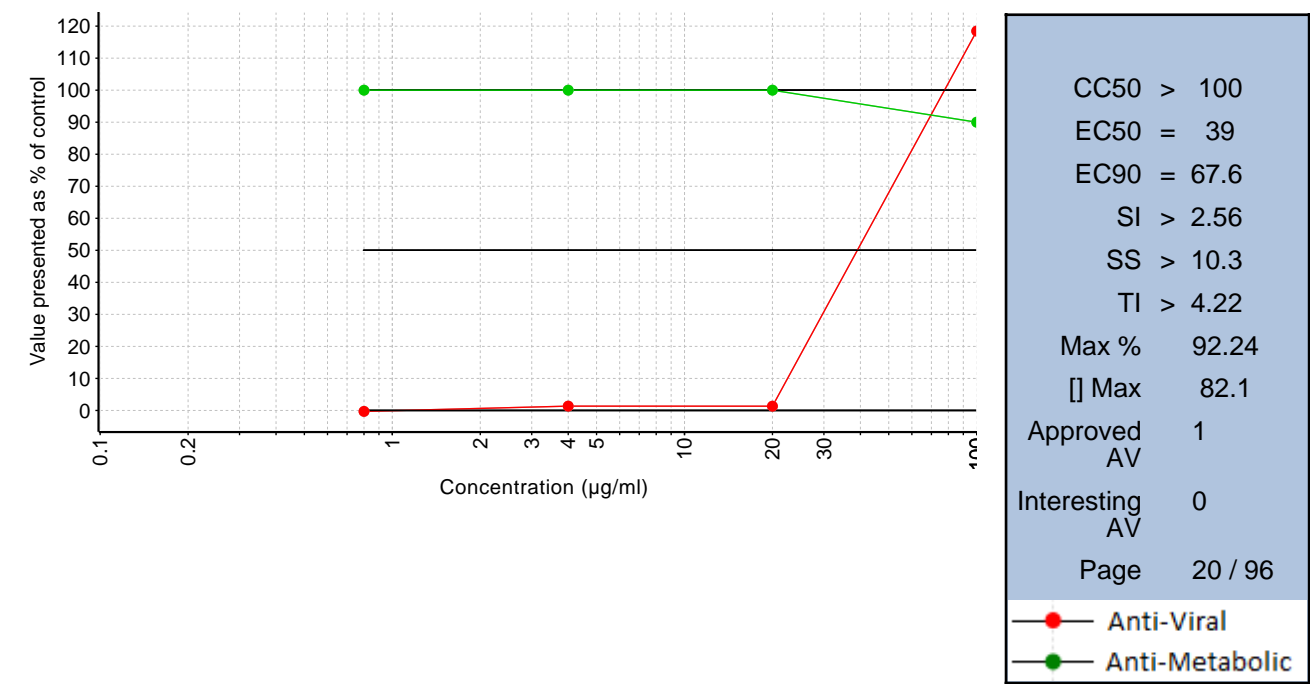

[Export chart data to CSV](#)

| Summary values |       |      |        |
|----------------|-------|------|--------|
| Statistic      | CC50  | EC50 | EC90   |
| Median         | > 100 | = 39 | = 67.6 |
| Med.Abs.Dev.   |       |      |        |
| Mean           | > 100 | = 39 | = 67.6 |
| Stdev.         |       |      |        |

| Compound       | Virus             |         |        | Cell |         | AV Method  |             | AM Method  |             |
|----------------|-------------------|---------|--------|------|---------|------------|-------------|------------|-------------|
| Primary code   | Species           | Type    | Strain | Type | Subtype | Method     | Type        | Method     | Type        |
| BAVAR IE1_0021 | Chikungunya virus | No Type | 899    | Vero | A       | Absorbance | MTS - 498nm | Microscopy | Tox scoring |

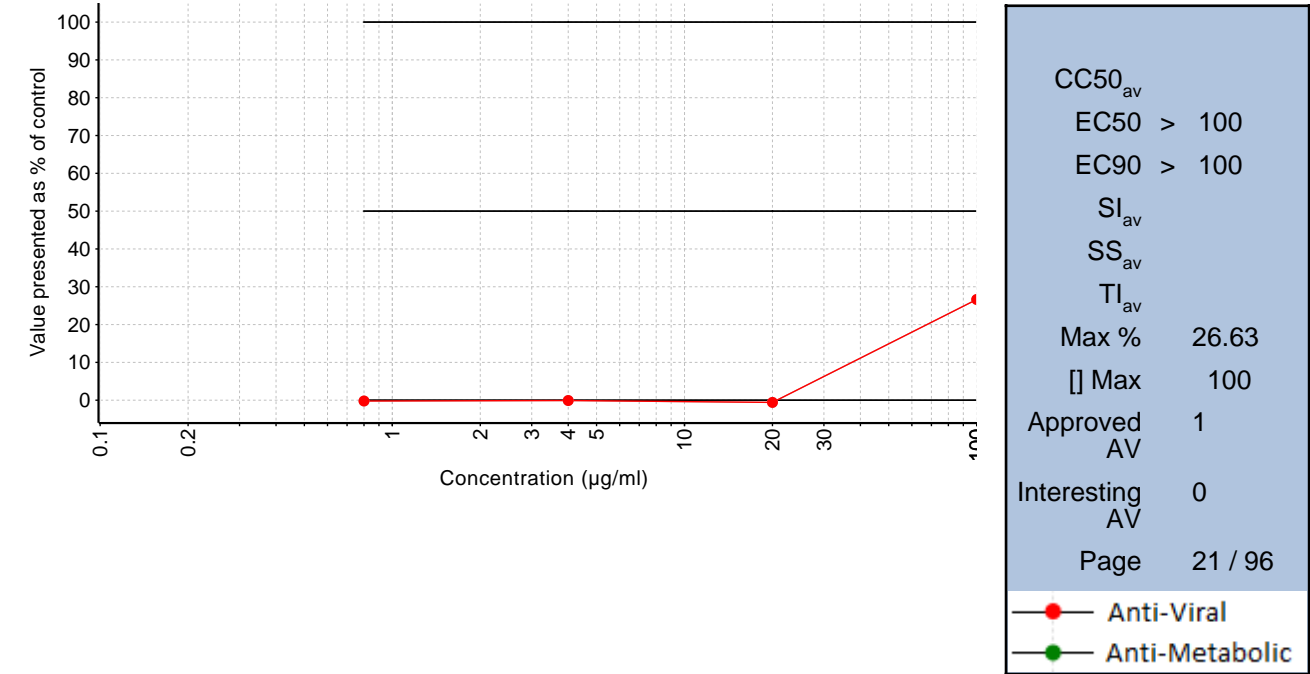

[Export chart data to CSV](#)

| Summary values |      |       |       |
|----------------|------|-------|-------|
| Statistic      | CC50 | EC50  | EC90  |
| Median         |      | > 100 | > 100 |
| Med.Abs.Dev.   |      |       |       |
| Mean           |      | > 100 | > 100 |
| Stdev.         |      |       |       |

| Compound       | Virus             |         |        | Cell |         | AV Method  |             | AM Method  |             |
|----------------|-------------------|---------|--------|------|---------|------------|-------------|------------|-------------|
| Primary code   | Species           | Type    | Strain | Type | Subtype | Method     | Type        | Method     | Type        |
| BAVAR IE1_0022 | Chikungunya virus | No Type | 899    | Vero | A       | Absorbance | MTS - 498nm | Microscopy | Tox scoring |

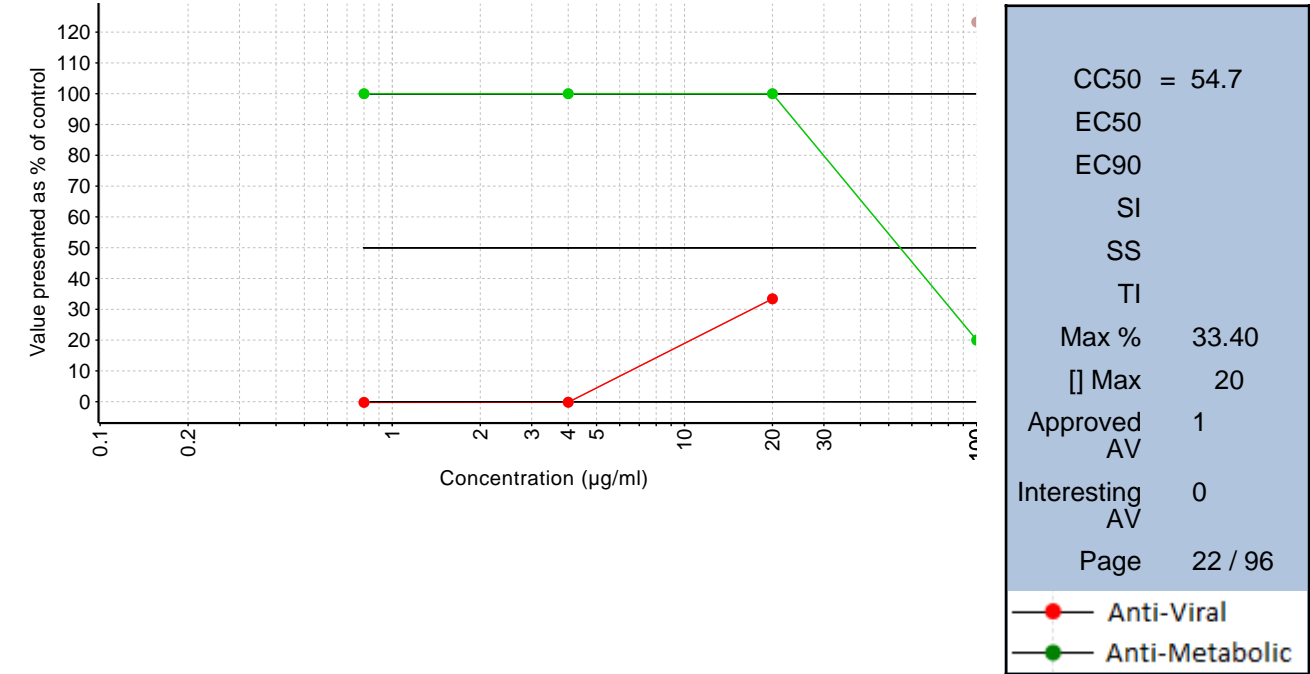

[Export chart data to CSV](#)

| Summary values |        |      |      |
|----------------|--------|------|------|
| Statistic      | CC50   | EC50 | EC90 |
| Median         | = 54.7 | > 20 | > 20 |
| Med.Abs.Dev.   |        |      |      |
| Mean           | = 54.7 | > 20 | > 20 |
| Stdev.         |        |      |      |

| Compound       | Virus             |         |        | Cell |         | AV Method  |             | AM Method  |             |
|----------------|-------------------|---------|--------|------|---------|------------|-------------|------------|-------------|
| Primary code   | Species           | Type    | Strain | Type | Subtype | Method     | Type        | Method     | Type        |
| BAVAR IE1_0023 | Chikungunya virus | No Type | 899    | Vero | A       | Absorbance | MTS - 498nm | Microscopy | Tox scoring |

Needs more data.

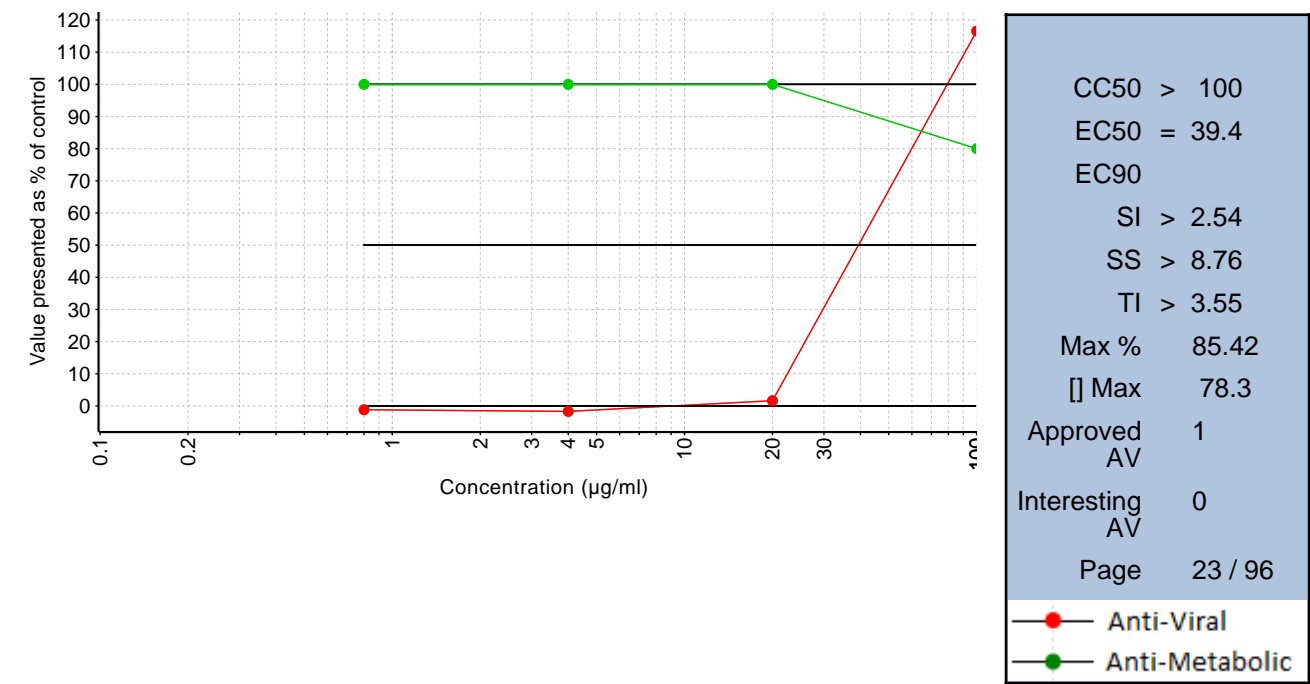

[Export chart data to CSV](#)

| Summary values |       |        |        |
|----------------|-------|--------|--------|
| Statistic      | CC50  | EC50   | EC90   |
| Median         | > 100 | = 39.4 | = 68.9 |
| Med.Abs.Dev.   |       |        |        |
| Mean           | > 100 | = 39.4 | = 68.9 |
| Stdev.         |       |        |        |



| Compound       | Virus             |         |        | Cell |         | AV Method  |             | AM Method  |             |
|----------------|-------------------|---------|--------|------|---------|------------|-------------|------------|-------------|
| Primary code   | Species           | Type    | Strain | Type | Subtype | Method     | Type        | Method     | Type        |
| BAVAR IE1_0024 | Chikungunya virus | No Type | 899    | Vero | A       | Absorbance | MTS - 498nm | Microscopy | Tox scoring |

Needs more data.

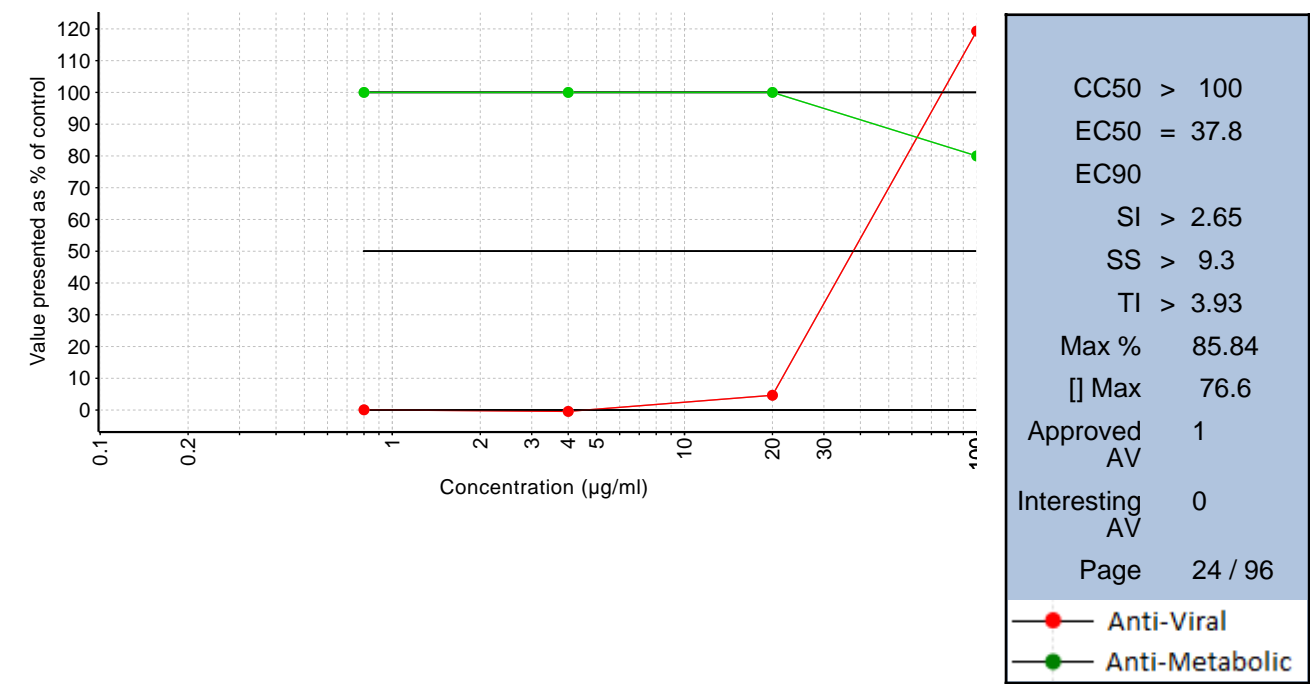

[Export chart data to CSV](#)

| Summary values |       |        |        |
|----------------|-------|--------|--------|
| Statistic      | CC50  | EC50   | EC90   |
| Median         | > 100 | = 37.8 | = 66.3 |
| Med.Abs.Dev.   |       |        |        |
| Mean           | > 100 | = 37.8 | = 66.3 |
| Stdev.         |       |        |        |

| Compound       | Virus             |         |        | Cell |         | AV Method  |             | AM Method  |             |
|----------------|-------------------|---------|--------|------|---------|------------|-------------|------------|-------------|
| Primary code   | Species           | Type    | Strain | Type | Subtype | Method     | Type        | Method     | Type        |
| BAVAR IE1_0025 | Chikungunya virus | No Type | 899    | Vero | A       | Absorbance | MTS - 498nm | Microscopy | Tox scoring |

Needs more data.

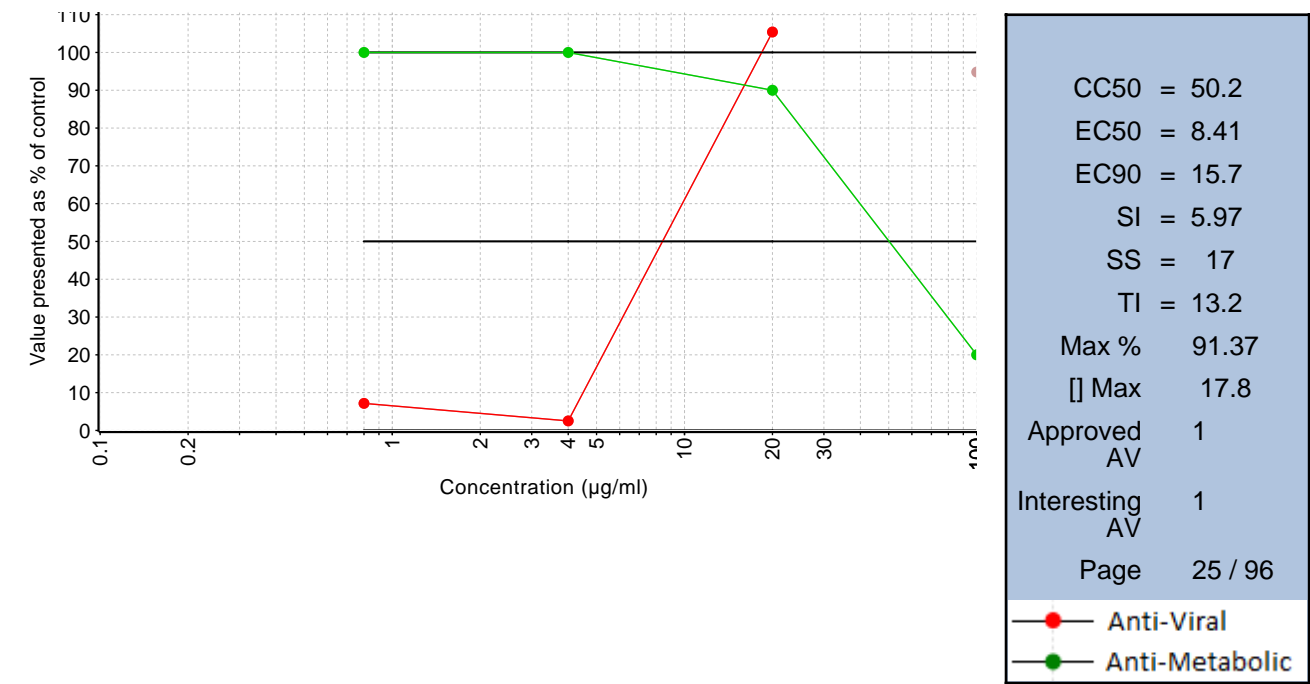

[Export chart data to CSV](#)

| Summary values |        |        |        |
|----------------|--------|--------|--------|
| Statistic      | CC50   | EC50   | EC90   |
| Median         | = 50.2 | = 8.41 | = 15.7 |
| Med.Abs.Dev.   |        |        |        |
| Mean           | = 50.2 | = 8.41 | = 15.7 |
| Stdev.         |        |        |        |

| Compound       | Virus             |         |        | Cell |         | AV Method  |             | AM Method  |             |
|----------------|-------------------|---------|--------|------|---------|------------|-------------|------------|-------------|
| Primary code   | Species           | Type    | Strain | Type | Subtype | Method     | Type        | Method     | Type        |
| BAVAR IE1_0026 | Chikungunya virus | No Type | 899    | Vero | A       | Absorbance | MTS - 498nm | Microscopy | Tox scoring |

Needs more data.

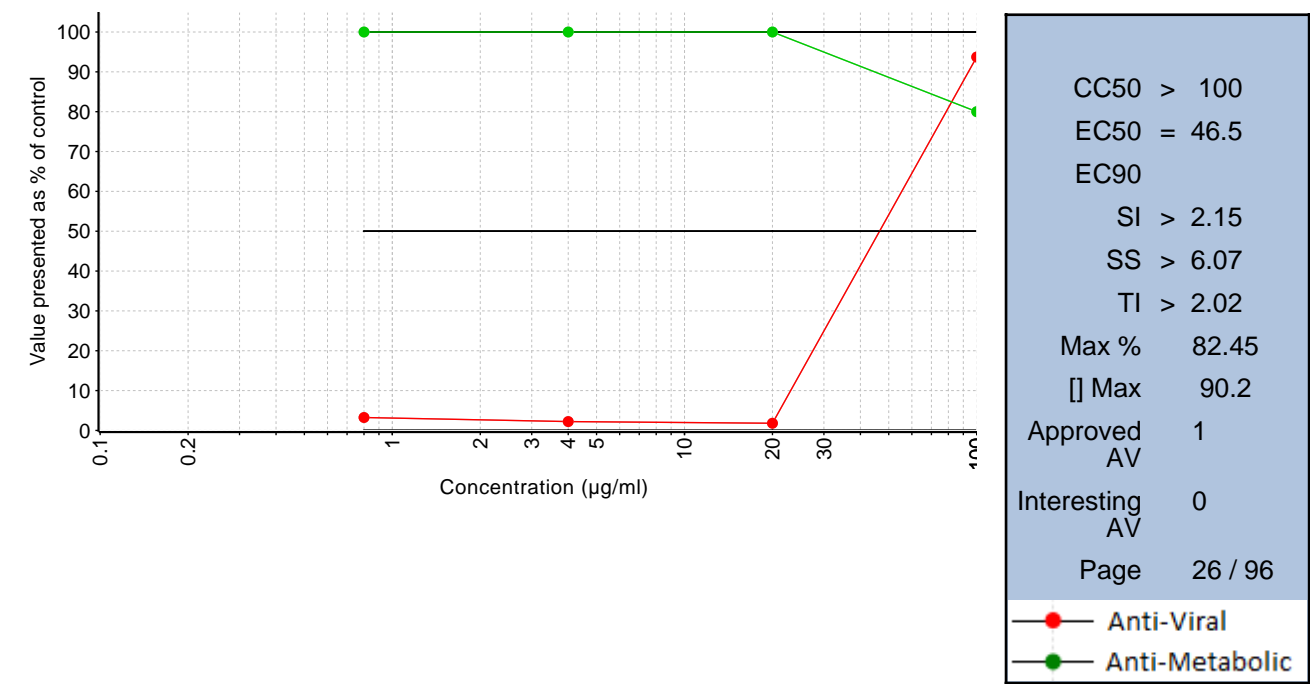

[Export chart data to CSV](#)

| Summary values |       |        |        |
|----------------|-------|--------|--------|
| Statistic      | CC50  | EC50   | EC90   |
| Median         | > 100 | = 46.5 | = 93.7 |
| Med.Abs.Dev.   |       |        |        |
| Mean           | > 100 | = 46.5 | = 93.7 |
| Stdev.         |       |        |        |

| Compound       | Virus             |         |        | Cell |         | AV Method  |             | AM Method  |             |
|----------------|-------------------|---------|--------|------|---------|------------|-------------|------------|-------------|
| Primary code   | Species           | Type    | Strain | Type | Subtype | Method     | Type        | Method     | Type        |
| BAVAR IE1_0027 | Chikungunya virus | No Type | 899    | Vero | A       | Absorbance | MTS - 498nm | Microscopy | Tox scoring |

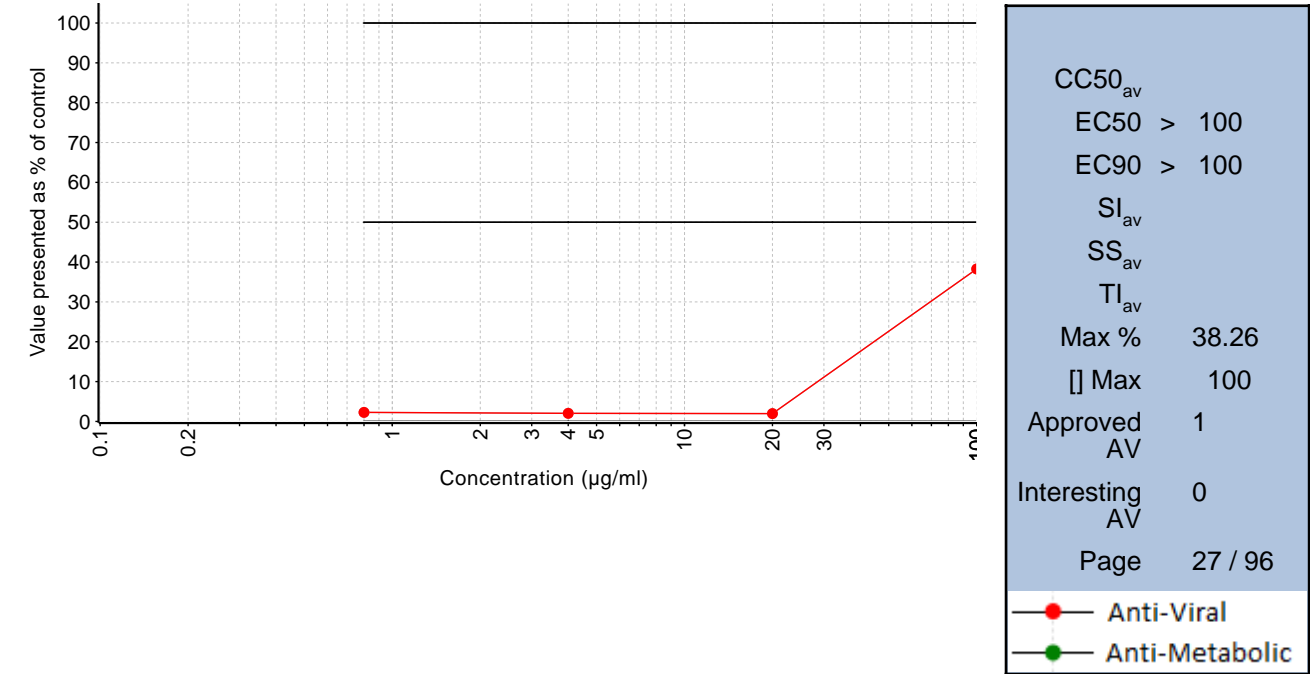

[Export chart data to CSV](#)

| Summary values |      |       |       |
|----------------|------|-------|-------|
| Statistic      | CC50 | EC50  | EC90  |
| Median         |      | > 100 | > 100 |
| Med.Abs.Dev.   |      |       |       |
| Mean           |      | > 100 | > 100 |
| Stdev.         |      |       |       |

| Compound       | Virus             |         |        | Cell |         | AV Method  |             | AM Method  |             |
|----------------|-------------------|---------|--------|------|---------|------------|-------------|------------|-------------|
| Primary code   | Species           | Type    | Strain | Type | Subtype | Method     | Type        | Method     | Type        |
| BAVAR IE1_0028 | Chikungunya virus | No Type | 899    | Vero | A       | Absorbance | MTS - 498nm | Microscopy | Tox scoring |

Needs more data.

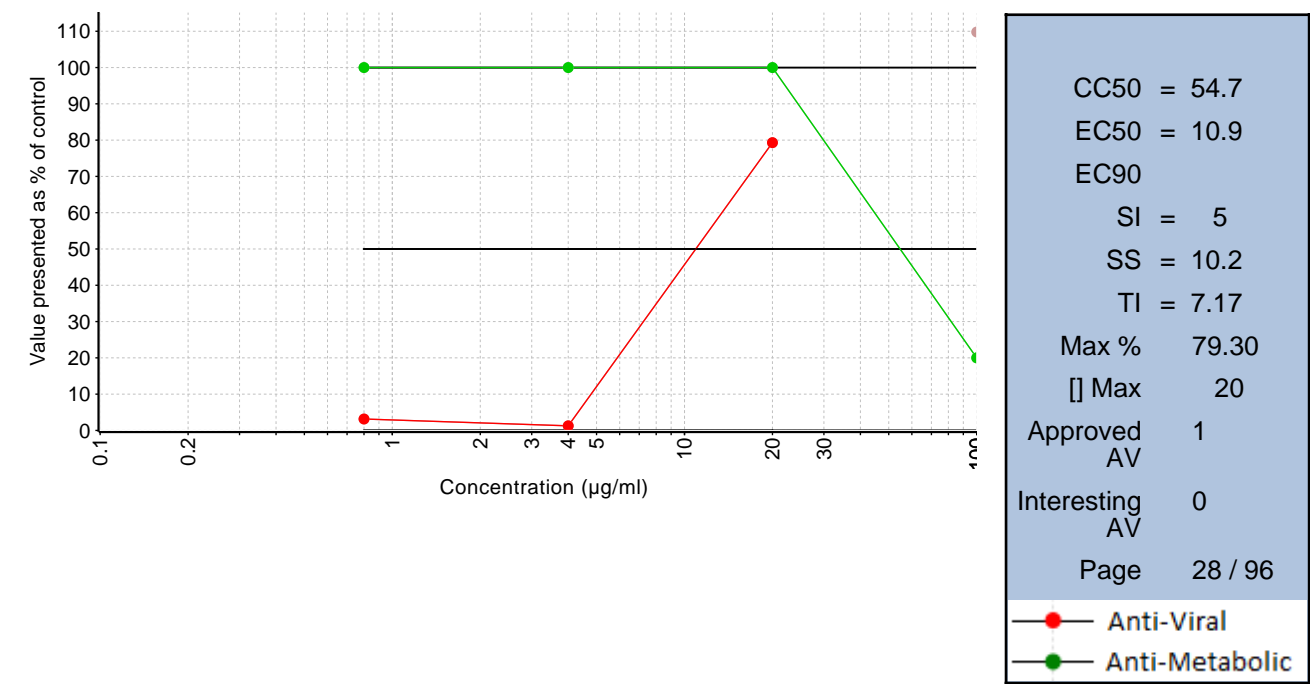

[Export chart data to CSV](#)

| Summary values |        |        |      |
|----------------|--------|--------|------|
| Statistic      | CC50   | EC50   | EC90 |
| Median         | = 54.7 | = 10.9 | > 20 |
| Med.Abs.Dev.   |        |        |      |
| Mean           | = 54.7 | = 10.9 | > 20 |
| Stdev.         |        |        |      |

| Compound       | Virus             |         |        | Cell |         | AV Method  |             | AM Method  |             |
|----------------|-------------------|---------|--------|------|---------|------------|-------------|------------|-------------|
| Primary code   | Species           | Type    | Strain | Type | Subtype | Method     | Type        | Method     | Type        |
| BAVAR IE1_0029 | Chikungunya virus | No Type | 899    | Vero | A       | Absorbance | MTS - 498nm | Microscopy | Tox scoring |

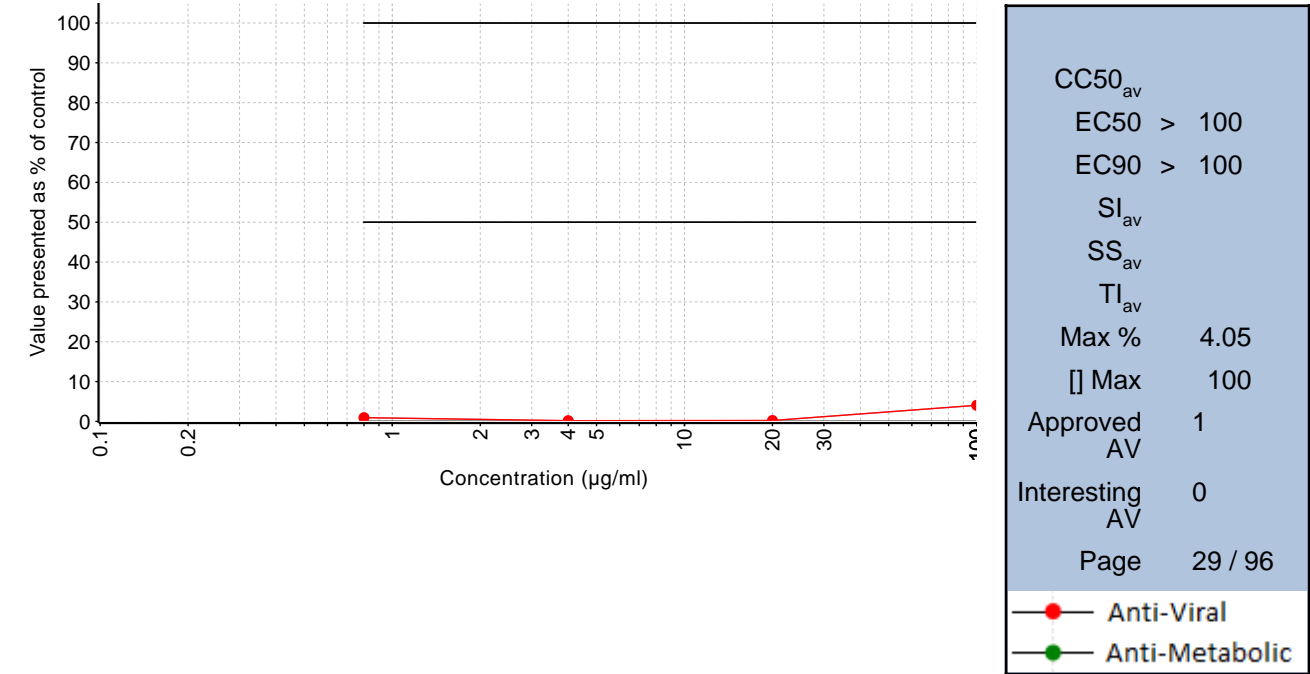

[Export chart data to CSV](#)

| Summary values |      |       |       |
|----------------|------|-------|-------|
| Statistic      | CC50 | EC50  | EC90  |
| Median         |      | > 100 | > 100 |
| Med.Abs.Dev.   |      |       |       |
| Mean           |      | > 100 | > 100 |
| Stdev.         |      |       |       |

| Compound       | Virus             |         |        | Cell |         | AV Method  |             | AM Method  |             |
|----------------|-------------------|---------|--------|------|---------|------------|-------------|------------|-------------|
| Primary code   | Species           | Type    | Strain | Type | Subtype | Method     | Type        | Method     | Type        |
| BAVAR IE1_0030 | Chikungunya virus | No Type | 899    | Vero | A       | Absorbance | MTS - 498nm | Microscopy | Tox scoring |

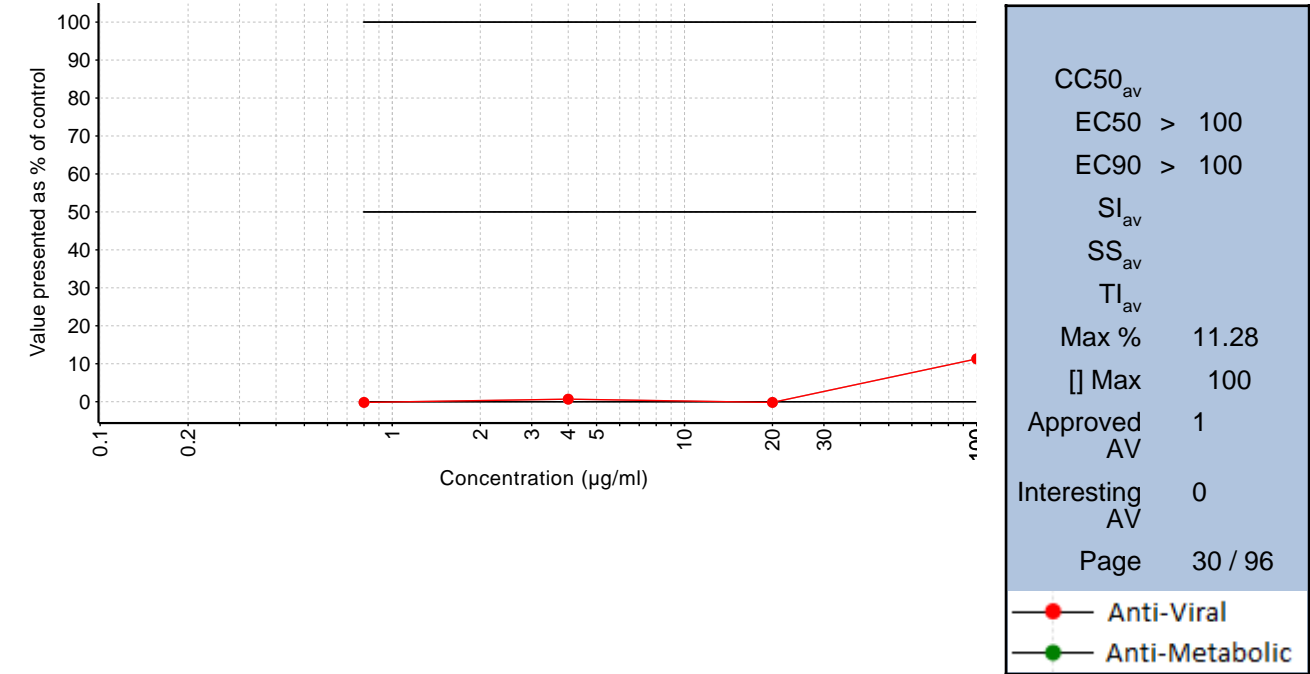

[Export chart data to CSV](#)

| Summary values |      |       |       |
|----------------|------|-------|-------|
| Statistic      | CC50 | EC50  | EC90  |
| Median         |      | > 100 | > 100 |
| Med.Abs.Dev.   |      |       |       |
| Mean           |      | > 100 | > 100 |
| Stdev.         |      |       |       |

| Compound       | Virus             |         |        | Cell |         | AV Method  |             | AM Method  |             |
|----------------|-------------------|---------|--------|------|---------|------------|-------------|------------|-------------|
| Primary code   | Species           | Type    | Strain | Type | Subtype | Method     | Type        | Method     | Type        |
| BAVAR IE1_0031 | Chikungunya virus | No Type | 899    | Vero | A       | Absorbance | MTS - 498nm | Microscopy | Tox scoring |

Needs more data.

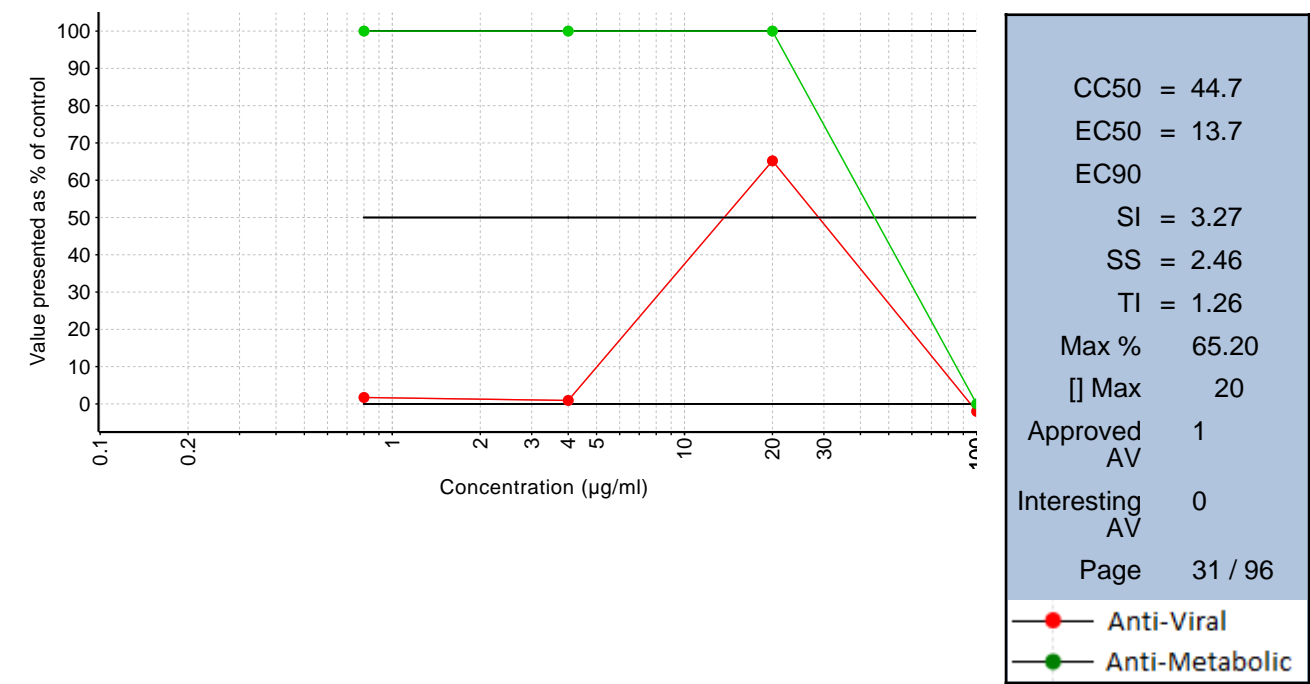

[Export chart data to CSV](#)

| Summary values |        |        |      |
|----------------|--------|--------|------|
| Statistic      | CC50   | EC50   | EC90 |
| Median         | = 36.8 | = 13.7 |      |
| Med.Abs.Dev.   | 7.97   |        |      |
| Mean           | = 36.8 | = 13.7 |      |
| Stdev.         | 11.3   |        |      |



| Compound       | Virus             |         |        | Cell |         | AV Method  |             | AM Method  |             |
|----------------|-------------------|---------|--------|------|---------|------------|-------------|------------|-------------|
| Primary code   | Species           | Type    | Strain | Type | Subtype | Method     | Type        | Method     | Type        |
| BAVAR IE1_0032 | Chikungunya virus | No Type | 899    | Vero | A       | Absorbance | MTS - 498nm | Microscopy | Tox scoring |

Needs more data.

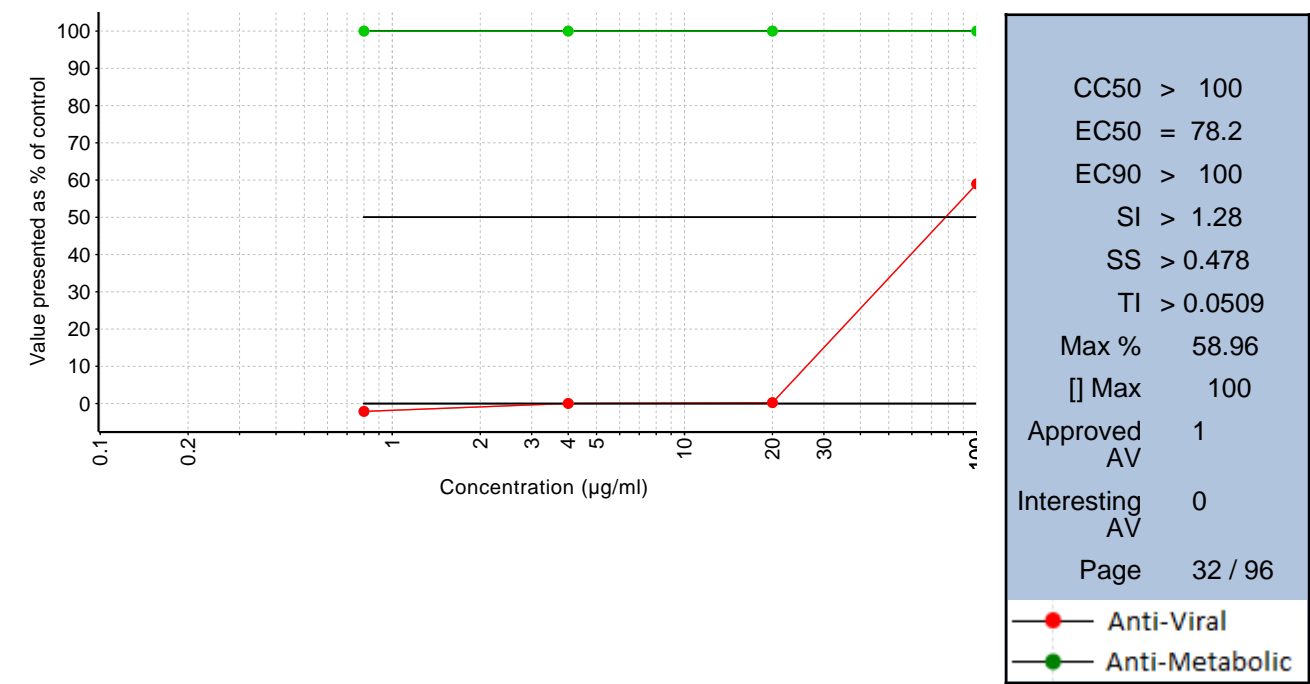

[Export chart data to CSV](#)

| Summary values |       |        |       |
|----------------|-------|--------|-------|
| Statistic      | CC50  | EC50   | EC90  |
| Median         | > 100 | = 78.2 | > 100 |
| Med.Abs.Dev.   |       |        |       |
| Mean           | > 100 | = 78.2 | > 100 |
| Stdev.         |       |        |       |

| Compound       | Virus             |         |        | Cell |         | AV Method  |             | AM Method  |             |
|----------------|-------------------|---------|--------|------|---------|------------|-------------|------------|-------------|
| Primary code   | Species           | Type    | Strain | Type | Subtype | Method     | Type        | Method     | Type        |
| BAVAR IE1_0033 | Chikungunya virus | No Type | 899    | Vero | A       | Absorbance | MTS - 498nm | Microscopy | Tox scoring |

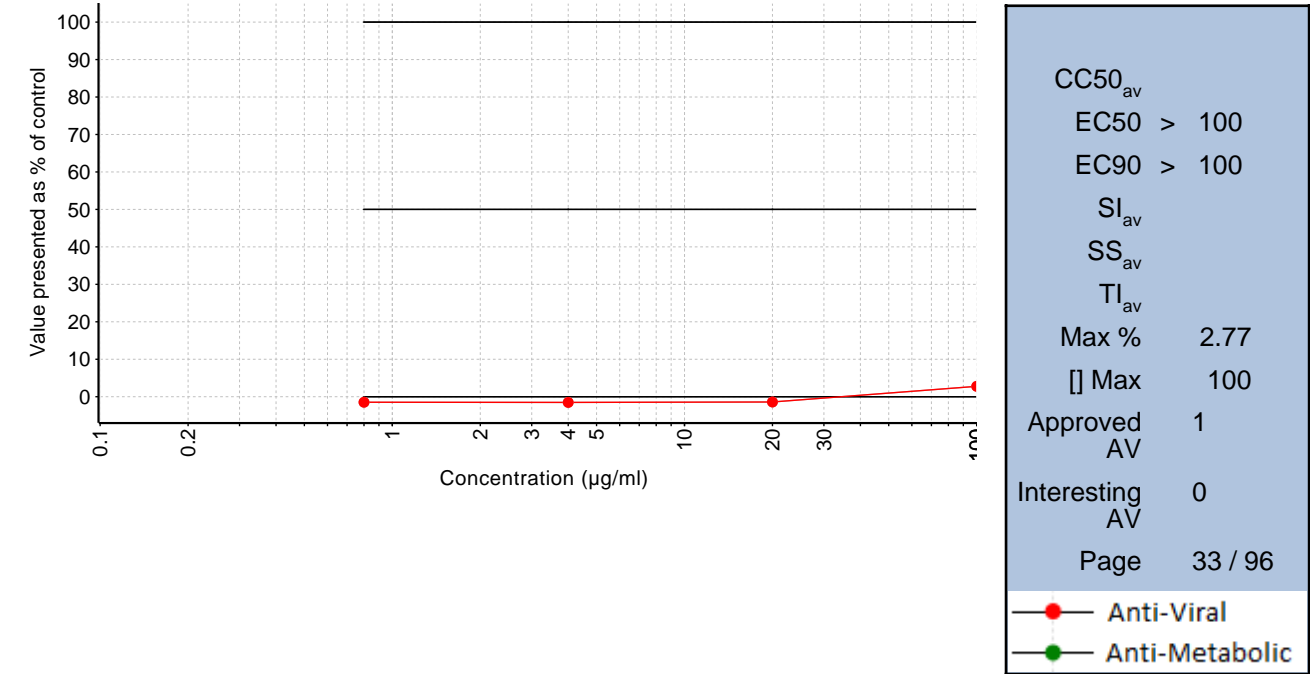

[Export chart data to CSV](#)

| Summary values |      |       |       |
|----------------|------|-------|-------|
| Statistic      | CC50 | EC50  | EC90  |
| Median         |      | > 100 | > 100 |
| Med.Abs.Dev.   |      |       |       |
| Mean           |      | > 100 | > 100 |
| Stdev.         |      |       |       |

| Compound       | Virus             |         |        | Cell |         | AV Method  |             | AM Method  |             |
|----------------|-------------------|---------|--------|------|---------|------------|-------------|------------|-------------|
| Primary code   | Species           | Type    | Strain | Type | Subtype | Method     | Type        | Method     | Type        |
| BAVAR IE1_0034 | Chikungunya virus | No Type | 899    | Vero | A       | Absorbance | MTS - 498nm | Microscopy | Tox scoring |

Needs more data.

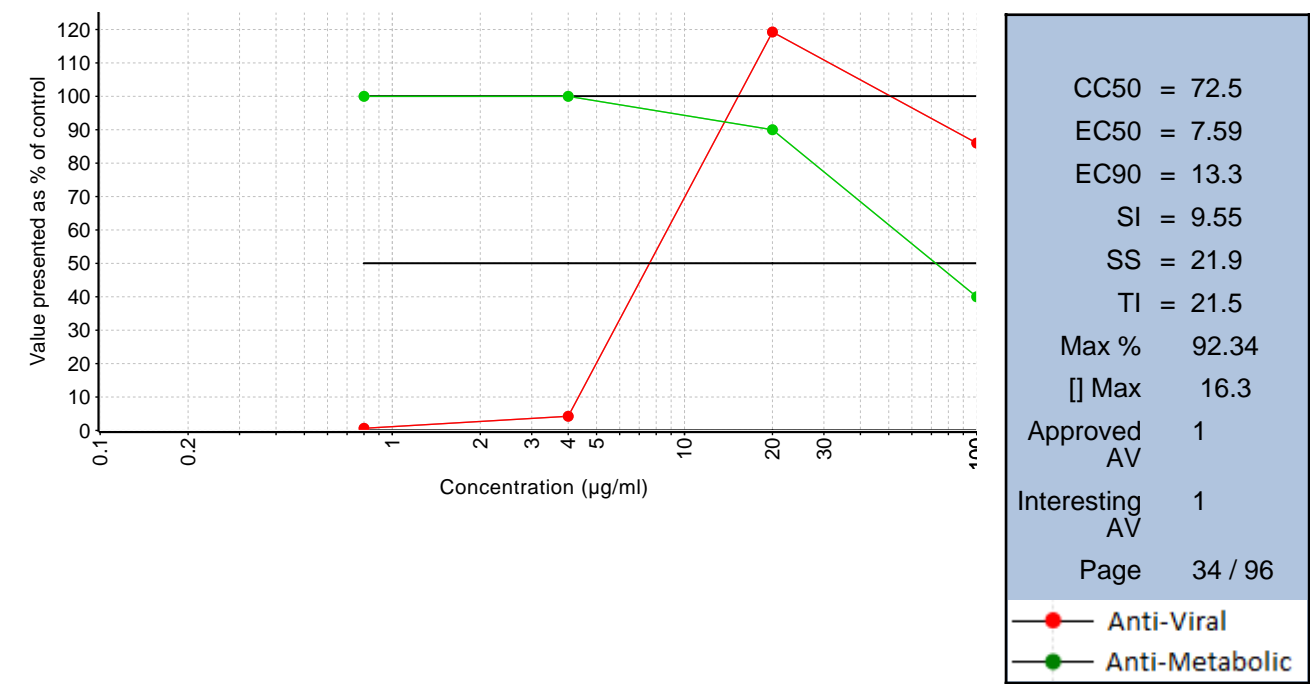

[Export chart data to CSV](#)

| Summary values |        |        |        |
|----------------|--------|--------|--------|
| Statistic      | CC50   | EC50   | EC90   |
| Median         | = 72.5 | = 7.59 | = 13.3 |
| Med.Abs.Dev.   |        |        |        |
| Mean           | = 72.5 | = 7.59 | = 13.3 |
| Stdev.         |        |        |        |

| Compound       | Virus             |         |        | Cell |         | AV Method  |             | AM Method  |             |
|----------------|-------------------|---------|--------|------|---------|------------|-------------|------------|-------------|
| Primary code   | Species           | Type    | Strain | Type | Subtype | Method     | Type        | Method     | Type        |
| BAVAR IE1_0035 | Chikungunya virus | No Type | 899    | Vero | A       | Absorbance | MTS - 498nm | Microscopy | Tox scoring |

Needs more data.

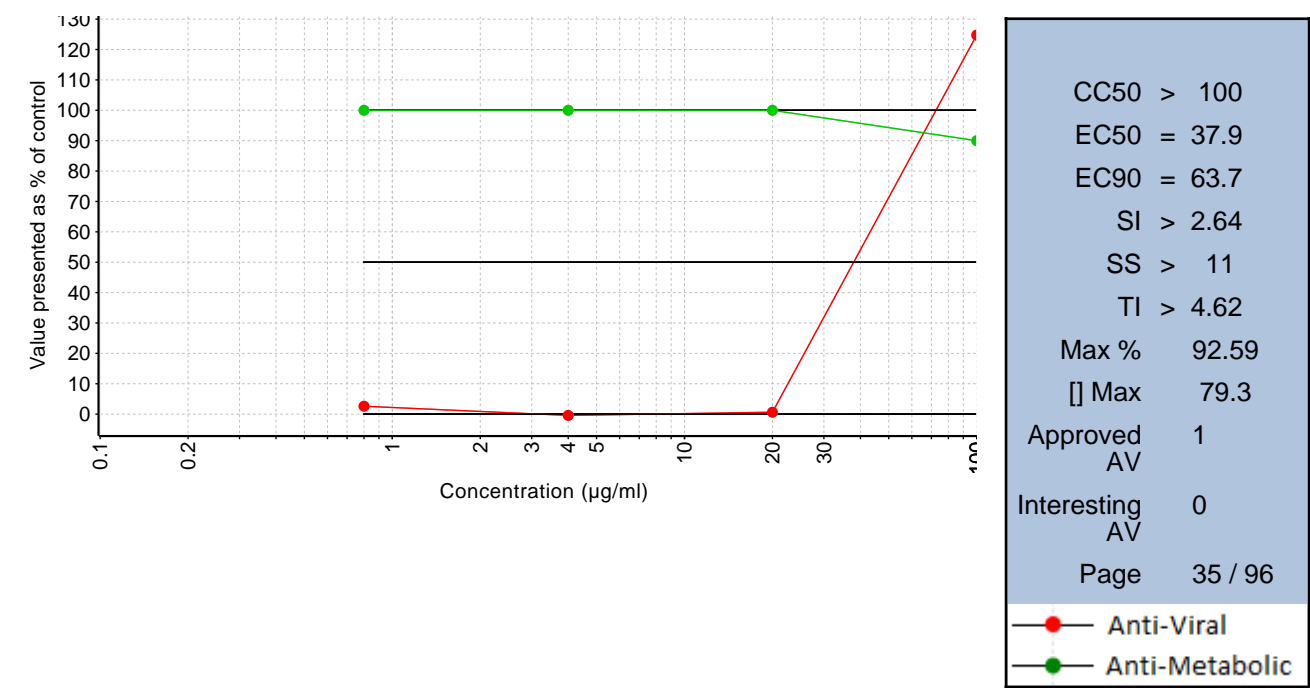

[Export chart data to CSV](#)

| Summary values |       |        |        |
|----------------|-------|--------|--------|
| Statistic      | CC50  | EC50   | EC90   |
| Median         | > 100 | = 37.9 | = 63.7 |
| Med.Abs.Dev.   |       |        |        |
| Mean           | > 100 | = 37.9 | = 63.7 |
| Stdev.         |       |        |        |

| Compound       | Virus             |         |        | Cell |         | AV Method  |             | AM Method  |             |
|----------------|-------------------|---------|--------|------|---------|------------|-------------|------------|-------------|
| Primary code   | Species           | Type    | Strain | Type | Subtype | Method     | Type        | Method     | Type        |
| BAVAR IE1_0036 | Chikungunya virus | No Type | 899    | Vero | A       | Absorbance | MTS - 498nm | Microscopy | Tox scoring |

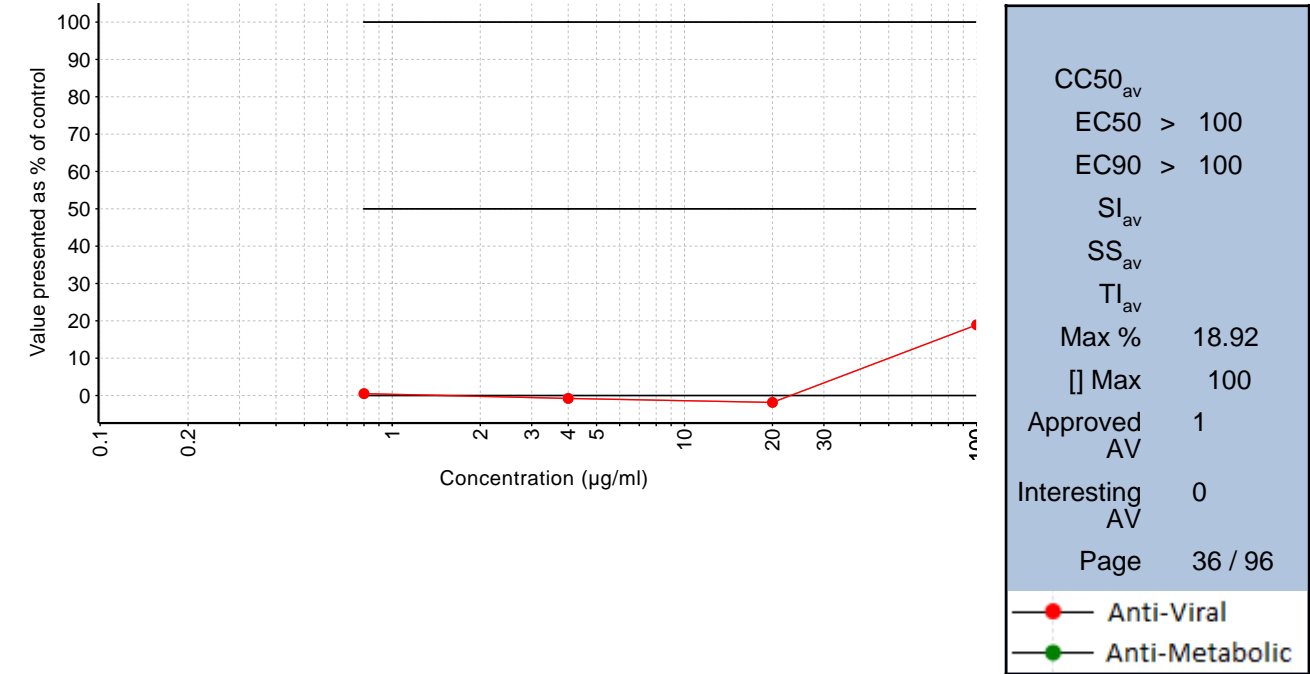

[Export chart data to CSV](#)

| Summary values |      |       |       |
|----------------|------|-------|-------|
| Statistic      | CC50 | EC50  | EC90  |
| Median         |      | > 100 | > 100 |
| Med.Abs.Dev.   |      |       |       |
| Mean           |      | > 100 | > 100 |
| Stdev.         |      |       |       |

| Compound       | Virus             |         |        | Cell |         | AV Method  |             | AM Method  |             |
|----------------|-------------------|---------|--------|------|---------|------------|-------------|------------|-------------|
| Primary code   | Species           | Type    | Strain | Type | Subtype | Method     | Type        | Method     | Type        |
| BAVAR IE1_0037 | Chikungunya virus | No Type | 899    | Vero | A       | Absorbance | MTS - 498nm | Microscopy | Tox scoring |

Needs more data.

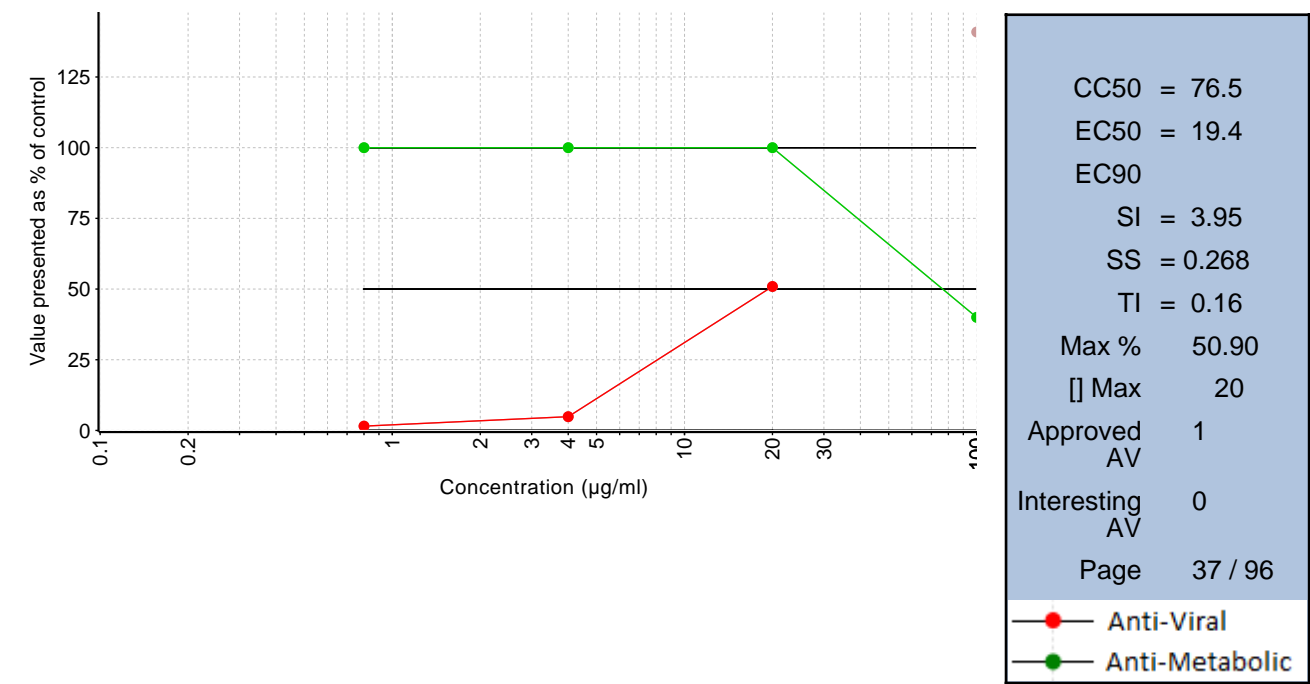

[Export chart data to CSV](#)

| Summary values |        |        |      |
|----------------|--------|--------|------|
| Statistic      | CC50   | EC50   | EC90 |
| Median         | = 76.5 | = 19.4 | > 20 |
| Med.Abs.Dev.   |        |        |      |
| Mean           | = 76.5 | = 19.4 | > 20 |
| Stdev.         |        |        |      |

| Compound       | Virus             |         |        | Cell |         | AV Method  |             | AM Method  |             |
|----------------|-------------------|---------|--------|------|---------|------------|-------------|------------|-------------|
| Primary code   | Species           | Type    | Strain | Type | Subtype | Method     | Type        | Method     | Type        |
| BAVAR IE1_0038 | Chikungunya virus | No Type | 899    | Vero | A       | Absorbance | MTS - 498nm | Microscopy | Tox scoring |

Needs more data.

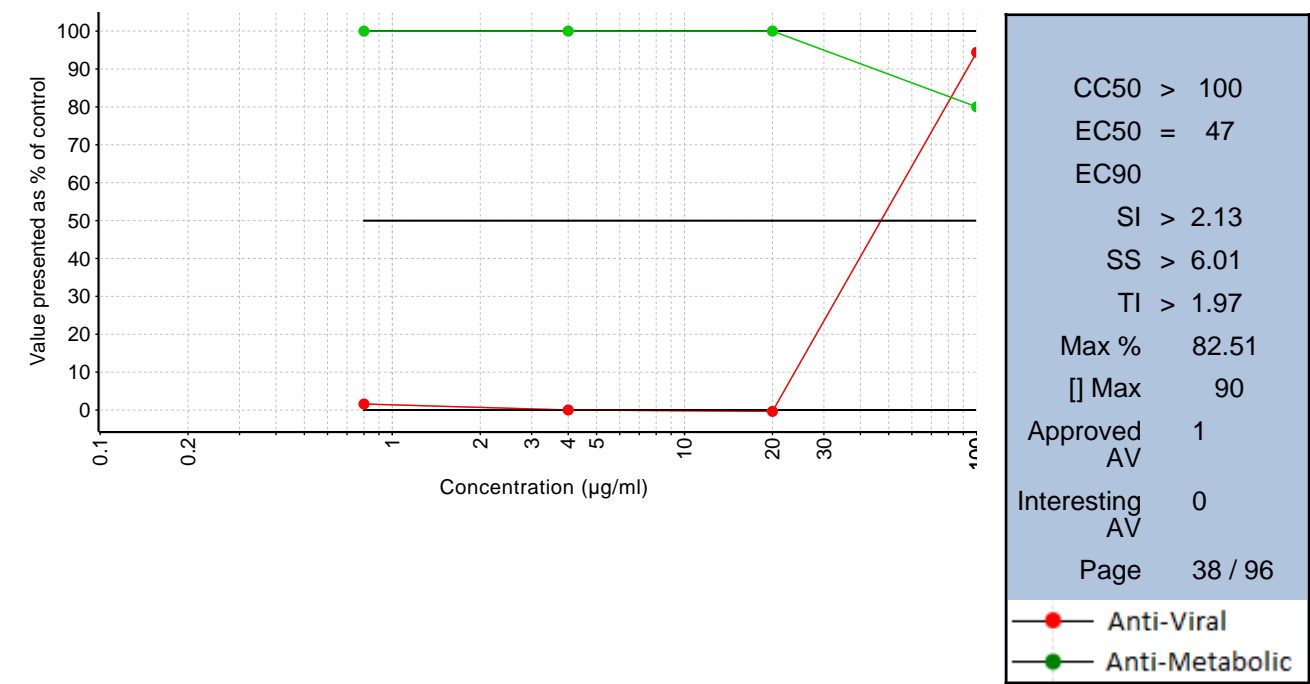

[Export chart data to CSV](#)

| Summary values |       |      |        |
|----------------|-------|------|--------|
| Statistic      | CC50  | EC50 | EC90   |
| Median         | > 100 | = 47 | = 92.8 |
| Med.Abs.Dev.   |       |      |        |
| Mean           | > 100 | = 47 | = 92.8 |
| Stdev.         |       |      |        |

| Compound       | Virus             |         |        | Cell |         | AV Method  |             | AM Method  |             |
|----------------|-------------------|---------|--------|------|---------|------------|-------------|------------|-------------|
| Primary code   | Species           | Type    | Strain | Type | Subtype | Method     | Type        | Method     | Type        |
| BAVAR IE1_0039 | Chikungunya virus | No Type | 899    | Vero | A       | Absorbance | MTS - 498nm | Microscopy | Tox scoring |

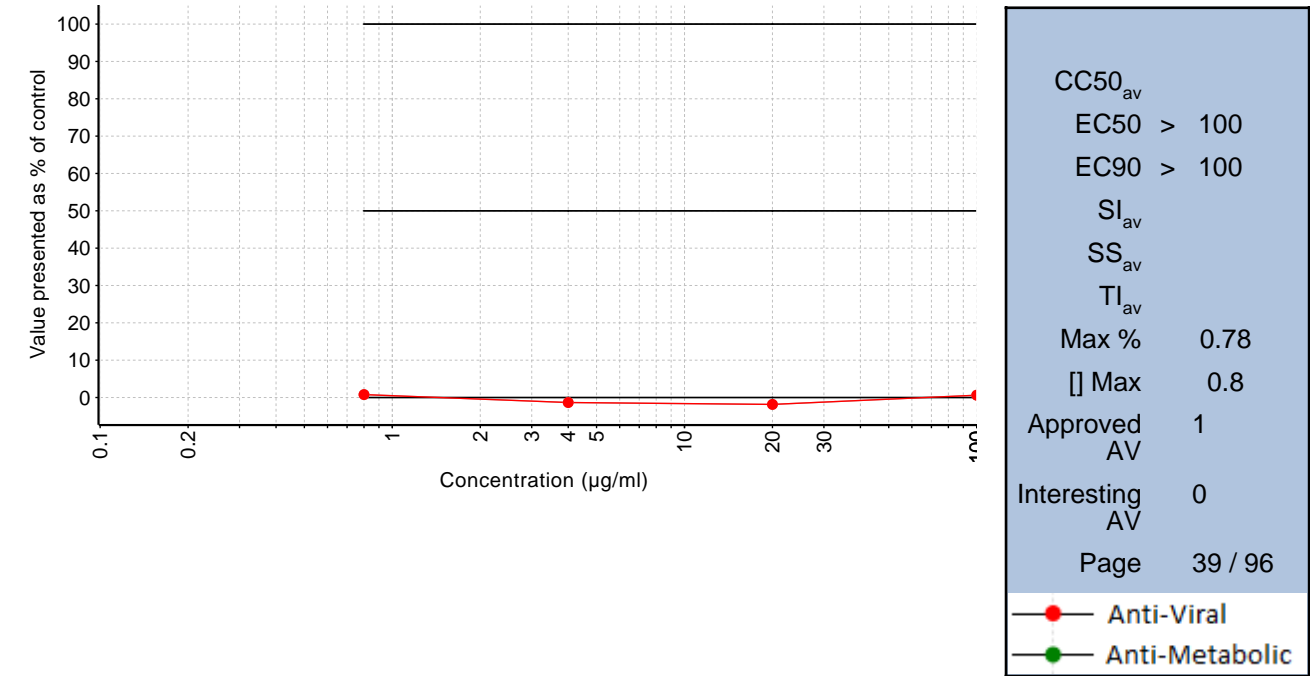

[Export chart data to CSV](#)

| Summary values |      |       |       |
|----------------|------|-------|-------|
| Statistic      | CC50 | EC50  | EC90  |
| Median         |      | > 100 | > 100 |
| Med.Abs.Dev.   |      |       |       |
| Mean           |      | > 100 | > 100 |
| Stdev.         |      |       |       |



| Compound       | Virus             |         |        | Cell |         | AV Method  |             | AM Method  |             |
|----------------|-------------------|---------|--------|------|---------|------------|-------------|------------|-------------|
| Primary code   | Species           | Type    | Strain | Type | Subtype | Method     | Type        | Method     | Type        |
| BAVAR IE1_0040 | Chikungunya virus | No Type | 899    | Vero | A       | Absorbance | MTS - 498nm | Microscopy | Tox scoring |

Needs more data.

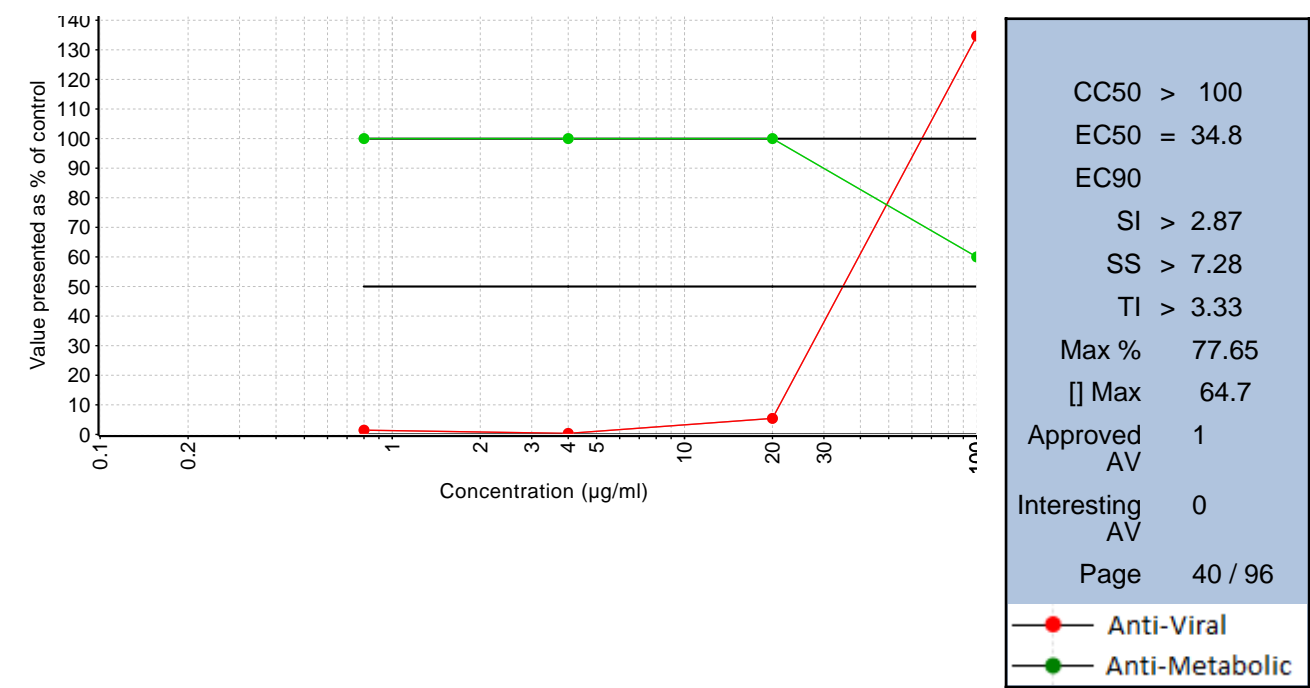

[Export chart data to CSV](#)

| Summary values |       |        |        |
|----------------|-------|--------|--------|
| Statistic      | CC50  | EC50   | EC90   |
| Median         | > 100 | = 34.8 | = 57.3 |
| Med.Abs.Dev.   |       |        |        |
| Mean           | > 100 | = 34.8 | = 57.3 |
| Stdev.         |       |        |        |

| Compound       | Virus             |         |        | Cell |         | AV Method  |             | AM Method  |             |
|----------------|-------------------|---------|--------|------|---------|------------|-------------|------------|-------------|
| Primary code   | Species           | Type    | Strain | Type | Subtype | Method     | Type        | Method     | Type        |
| BAVAR IE1_0041 | Chikungunya virus | No Type | 899    | Vero | A       | Absorbance | MTS - 498nm | Microscopy | Tox scoring |

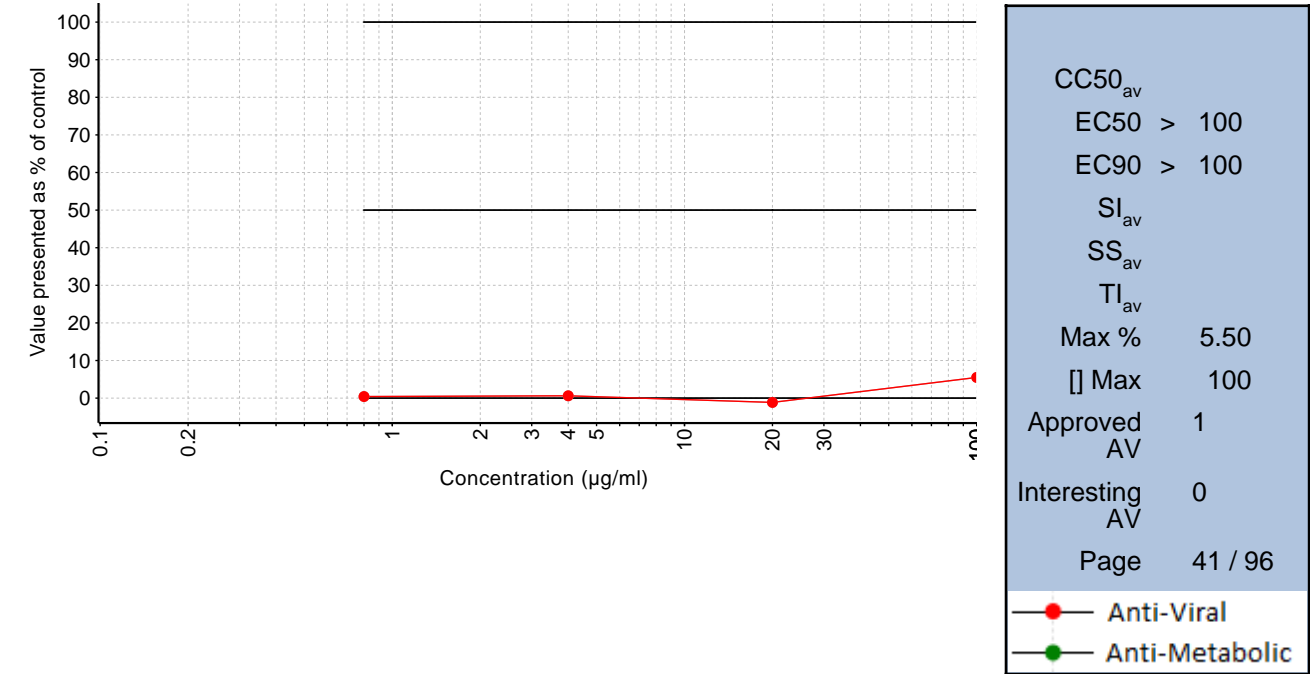

[Export chart data to CSV](#)

| Summary values |      |       |       |
|----------------|------|-------|-------|
| Statistic      | CC50 | EC50  | EC90  |
| Median         |      | > 100 | > 100 |
| Med.Abs.Dev.   |      |       |       |
| Mean           |      | > 100 | > 100 |
| Stdev.         |      |       |       |

| Compound       | Virus             |         |        | Cell |         | AV Method  |             | AM Method  |             |
|----------------|-------------------|---------|--------|------|---------|------------|-------------|------------|-------------|
| Primary code   | Species           | Type    | Strain | Type | Subtype | Method     | Type        | Method     | Type        |
| BAVAR IE1_0042 | Chikungunya virus | No Type | 899    | Vero | A       | Absorbance | MTS - 498nm | Microscopy | Tox scoring |

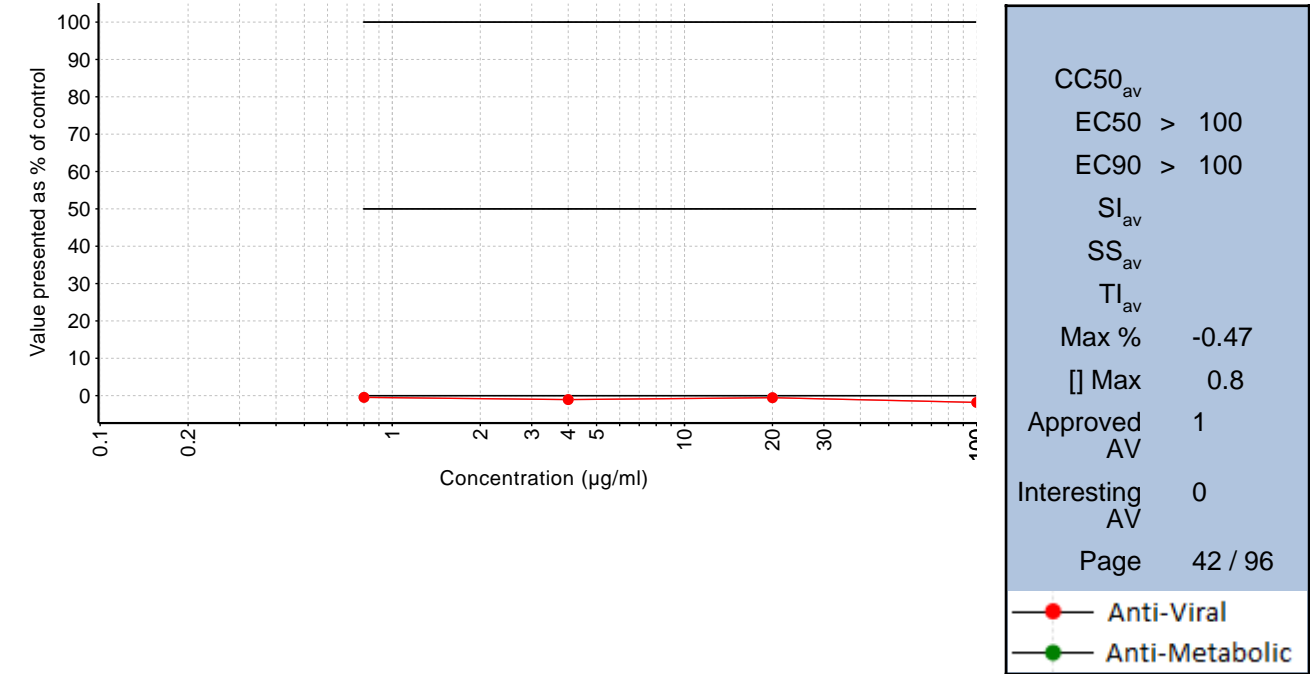

[Export chart data to CSV](#)

| Summary values |      |       |       |
|----------------|------|-------|-------|
| Statistic      | CC50 | EC50  | EC90  |
| Median         |      | > 100 | > 100 |
| Med.Abs.Dev.   |      |       |       |
| Mean           |      | > 100 | > 100 |
| Stdev.         |      |       |       |

| Compound       | Virus             |         |        | Cell |         | AV Method  |             | AM Method  |             |
|----------------|-------------------|---------|--------|------|---------|------------|-------------|------------|-------------|
| Primary code   | Species           | Type    | Strain | Type | Subtype | Method     | Type        | Method     | Type        |
| BAVAR IE1_0043 | Chikungunya virus | No Type | 899    | Vero | A       | Absorbance | MTS - 498nm | Microscopy | Tox scoring |

Needs more data.

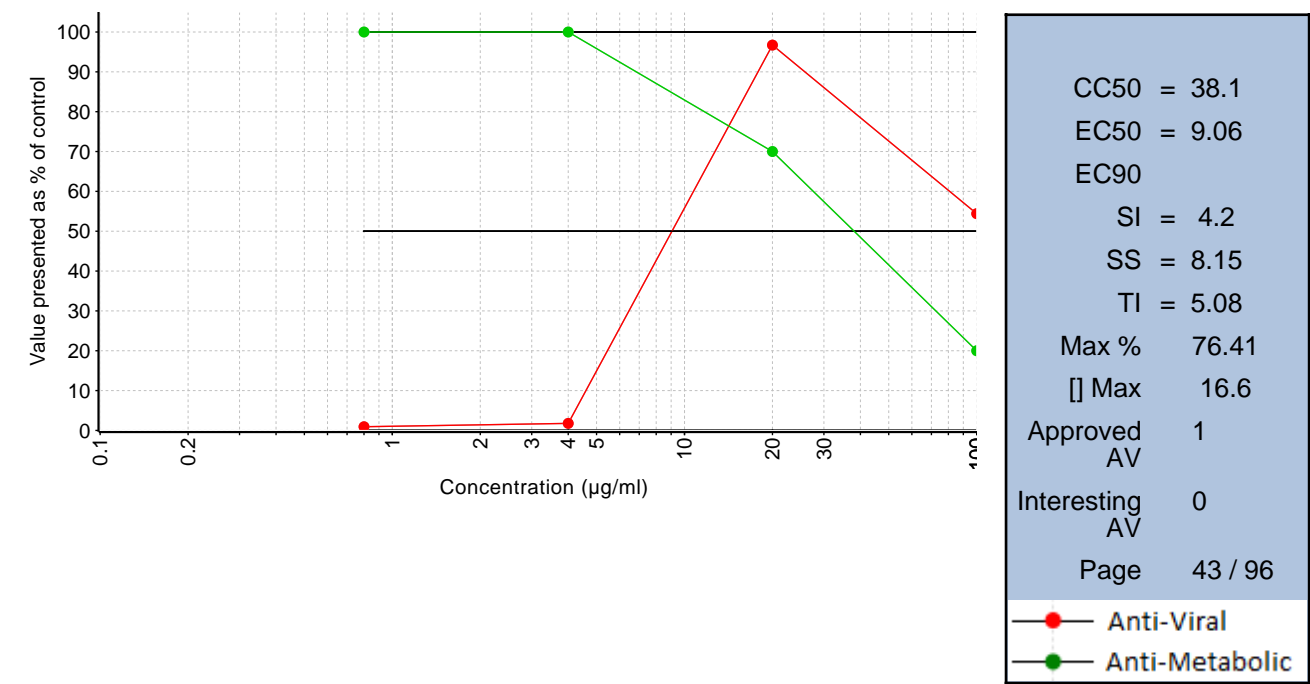

[Export chart data to CSV](#)

| Summary values |        |        |        |
|----------------|--------|--------|--------|
| Statistic      | CC50   | EC50   | EC90   |
| Median         | = 38.1 | = 9.06 | = 17.8 |
| Med.Abs.Dev.   |        |        |        |
| Mean           | = 38.1 | = 9.06 | = 17.8 |
| Stdev.         |        |        |        |

| Compound       | Virus             |         |        | Cell |         | AV Method  |             | AM Method  |             |
|----------------|-------------------|---------|--------|------|---------|------------|-------------|------------|-------------|
| Primary code   | Species           | Type    | Strain | Type | Subtype | Method     | Type        | Method     | Type        |
| BAVAR IE1_0044 | Chikungunya virus | No Type | 899    | Vero | A       | Absorbance | MTS - 498nm | Microscopy | Tox scoring |

Needs more data.

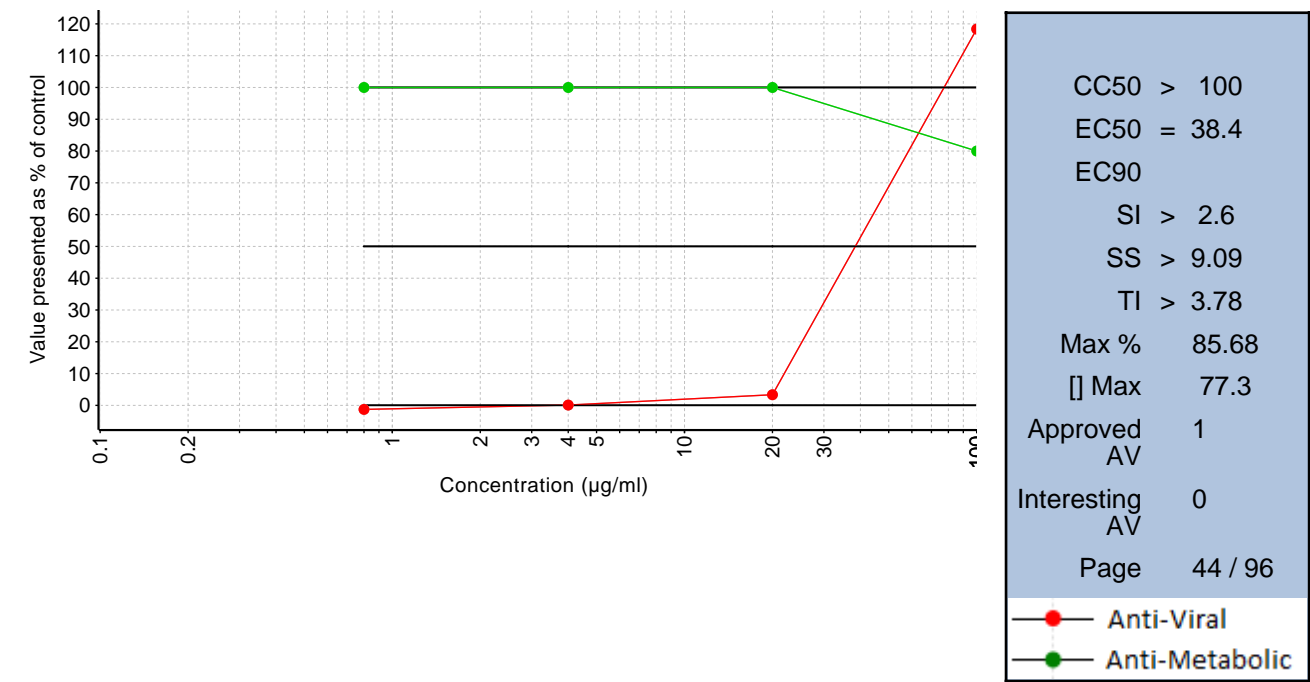

[Export chart data to CSV](#)

| Summary values |       |        |        |
|----------------|-------|--------|--------|
| Statistic      | CC50  | EC50   | EC90   |
| Median         | > 100 | = 38.4 | = 67.2 |
| Med.Abs.Dev.   |       |        |        |
| Mean           | > 100 | = 38.4 | = 67.2 |
| Stdev.         |       |        |        |

| Compound       | Virus             |         |        | Cell |         | AV Method  |             | AM Method  |             |
|----------------|-------------------|---------|--------|------|---------|------------|-------------|------------|-------------|
| Primary code   | Species           | Type    | Strain | Type | Subtype | Method     | Type        | Method     | Type        |
| BAVAR IE1_0045 | Chikungunya virus | No Type | 899    | Vero | A       | Absorbance | MTS - 498nm | Microscopy | Tox scoring |

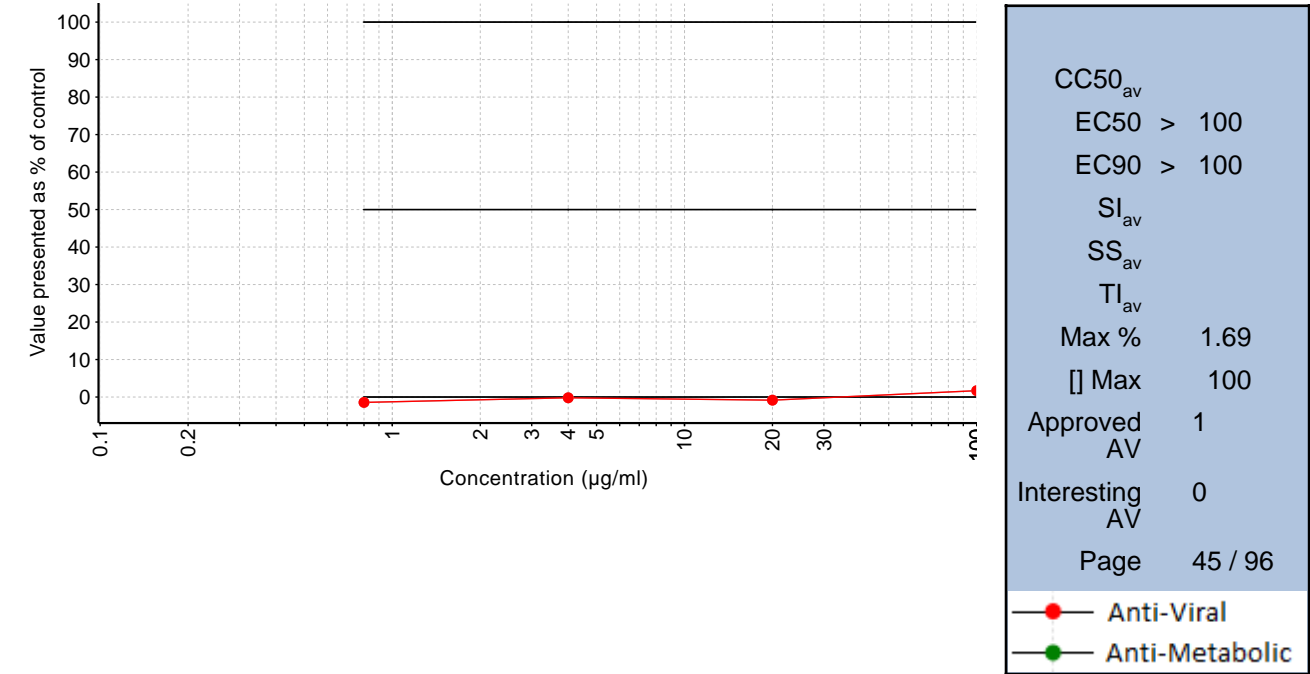

[Export chart data to CSV](#)

| Summary values |      |       |       |
|----------------|------|-------|-------|
| Statistic      | CC50 | EC50  | EC90  |
| Median         |      | > 100 | > 100 |
| Med.Abs.Dev.   |      |       |       |
| Mean           |      | > 100 | > 100 |
| Stdev.         |      |       |       |

| Compound       | Virus             |         |        | Cell |         | AV Method  |             | AM Method  |             |
|----------------|-------------------|---------|--------|------|---------|------------|-------------|------------|-------------|
| Primary code   | Species           | Type    | Strain | Type | Subtype | Method     | Type        | Method     | Type        |
| BAVAR IE1_0046 | Chikungunya virus | No Type | 899    | Vero | A       | Absorbance | MTS - 498nm | Microscopy | Tox scoring |

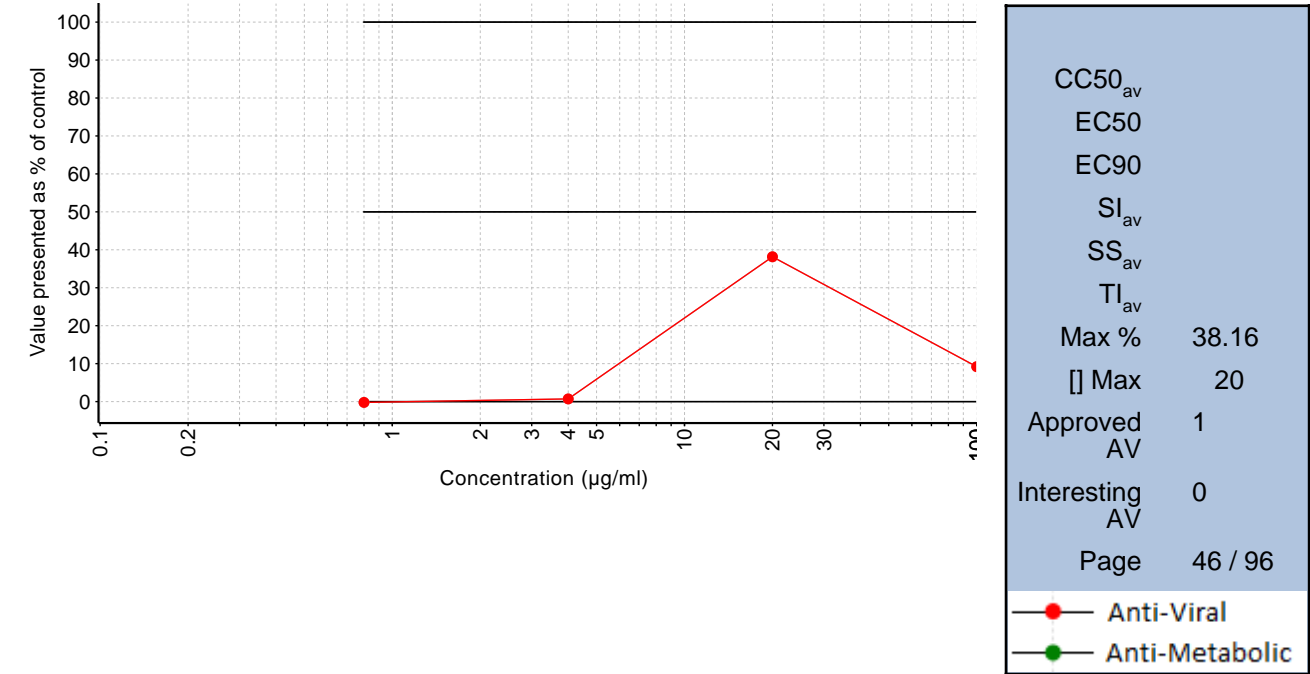

[Export chart data to CSV](#)

| Summary values |      |      |      |
|----------------|------|------|------|
| Statistic      | CC50 | EC50 | EC90 |
| Median         |      |      |      |
| Med.Abs.Dev.   |      |      |      |
| Mean           |      |      |      |
| Stdev.         |      |      |      |

| Compound       | Virus             |         |        | Cell |         | AV Method  |             | AM Method  |             |
|----------------|-------------------|---------|--------|------|---------|------------|-------------|------------|-------------|
| Primary code   | Species           | Type    | Strain | Type | Subtype | Method     | Type        | Method     | Type        |
| BAVAR IE1_0047 | Chikungunya virus | No Type | 899    | Vero | A       | Absorbance | MTS - 498nm | Microscopy | Tox scoring |

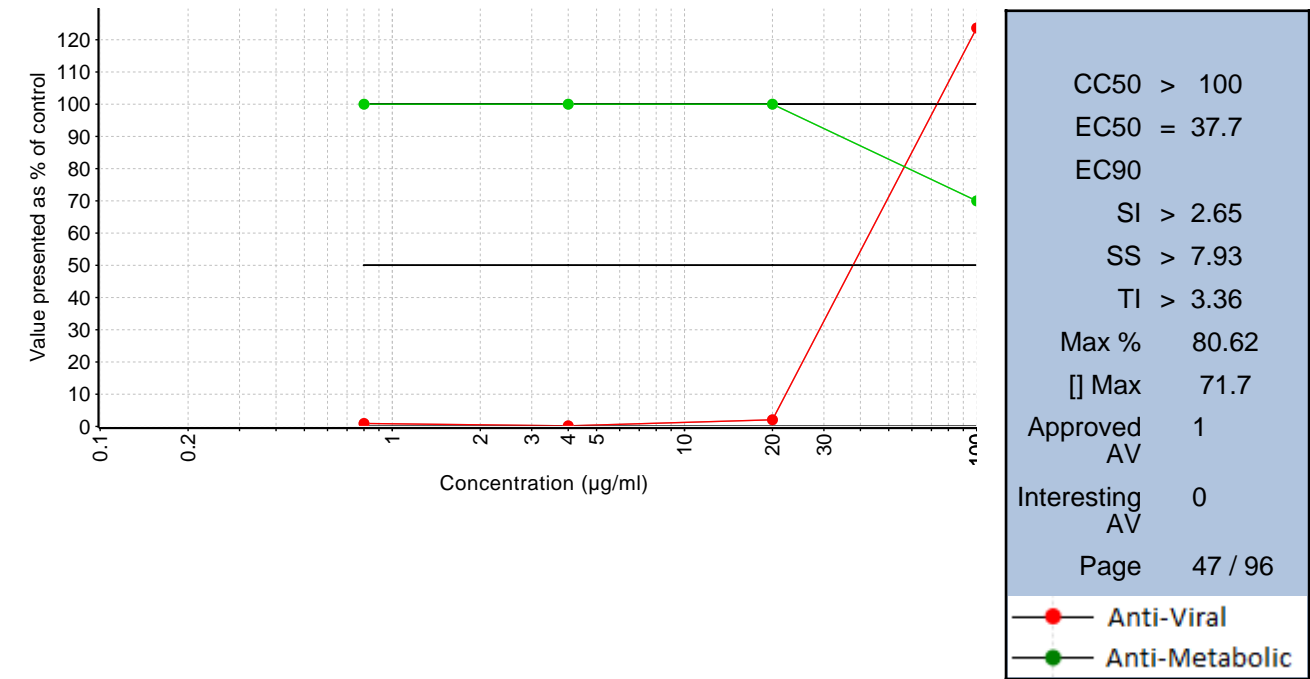

[Export chart data to CSV](#)

| Summary values |       |        |        |
|----------------|-------|--------|--------|
| Statistic      | CC50  | EC50   | EC90   |
| Median         | > 100 | = 37.7 | = 64.1 |
| Med.Abs.Dev.   |       |        |        |
| Mean           | > 100 | = 37.7 | = 64.1 |
| Stdev.         |       |        |        |



| Compound       | Virus             |         |        | Cell |         | AV Method  |             | AM Method  |             |
|----------------|-------------------|---------|--------|------|---------|------------|-------------|------------|-------------|
| Primary code   | Species           | Type    | Strain | Type | Subtype | Method     | Type        | Method     | Type        |
| BAVAR IE1_0048 | Chikungunya virus | No Type | 899    | Vero | A       | Absorbance | MTS - 498nm | Microscopy | Tox scoring |

Needs more data.

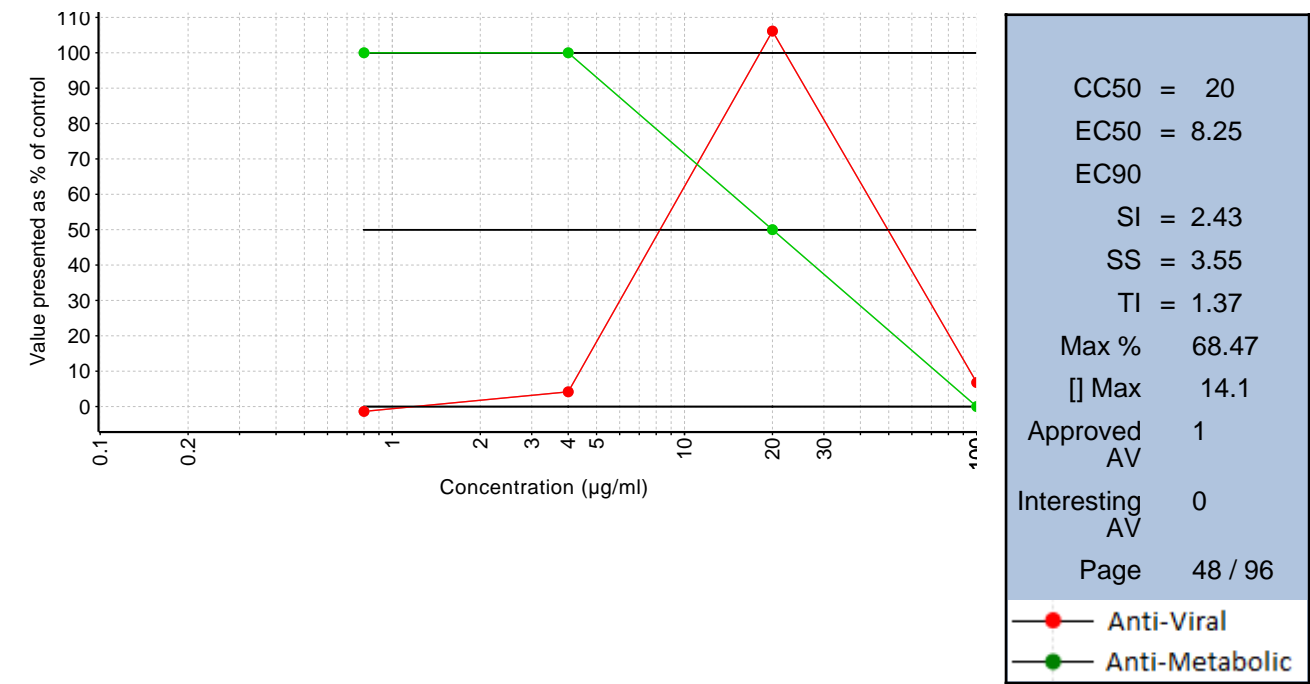

[Export chart data to CSV](#)

| Summary values |        |        |        |
|----------------|--------|--------|--------|
| Statistic      | CC50   | EC50   | EC90   |
| Median         | = 34.8 | = 8.25 | = 15.5 |
| Med.Abs.Dev.   | 14.8   |        |        |
| Mean           | = 34.8 | = 8.25 | = 15.5 |
| Stdev.         | 21     |        |        |

| Compound       | Virus             |         |        | Cell |         | AV Method  |             | AM Method  |             |
|----------------|-------------------|---------|--------|------|---------|------------|-------------|------------|-------------|
| Primary code   | Species           | Type    | Strain | Type | Subtype | Method     | Type        | Method     | Type        |
| BAVAR IE1_0049 | Chikungunya virus | No Type | 899    | Vero | A       | Absorbance | MTS - 498nm | Microscopy | Tox scoring |

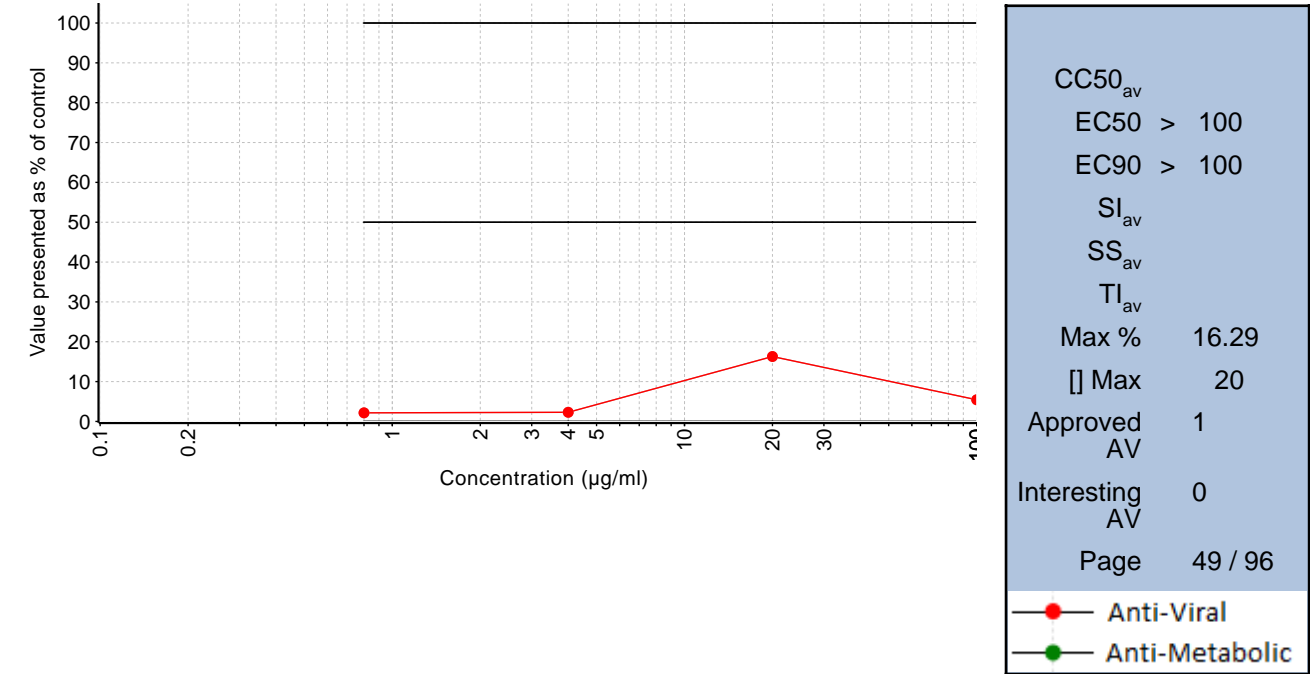

[Export chart data to CSV](#)

| Summary values |      |       |       |
|----------------|------|-------|-------|
| Statistic      | CC50 | EC50  | EC90  |
| Median         |      | > 100 | > 100 |
| Med.Abs.Dev.   |      |       |       |
| Mean           |      | > 100 | > 100 |
| Stdev.         |      |       |       |

| Compound       | Virus             |         |        | Cell |         | AV Method  |             | AM Method  |             |
|----------------|-------------------|---------|--------|------|---------|------------|-------------|------------|-------------|
| Primary code   | Species           | Type    | Strain | Type | Subtype | Method     | Type        | Method     | Type        |
| BAVAR IE1_0050 | Chikungunya virus | No Type | 899    | Vero | A       | Absorbance | MTS - 498nm | Microscopy | Tox scoring |

Needs more data.

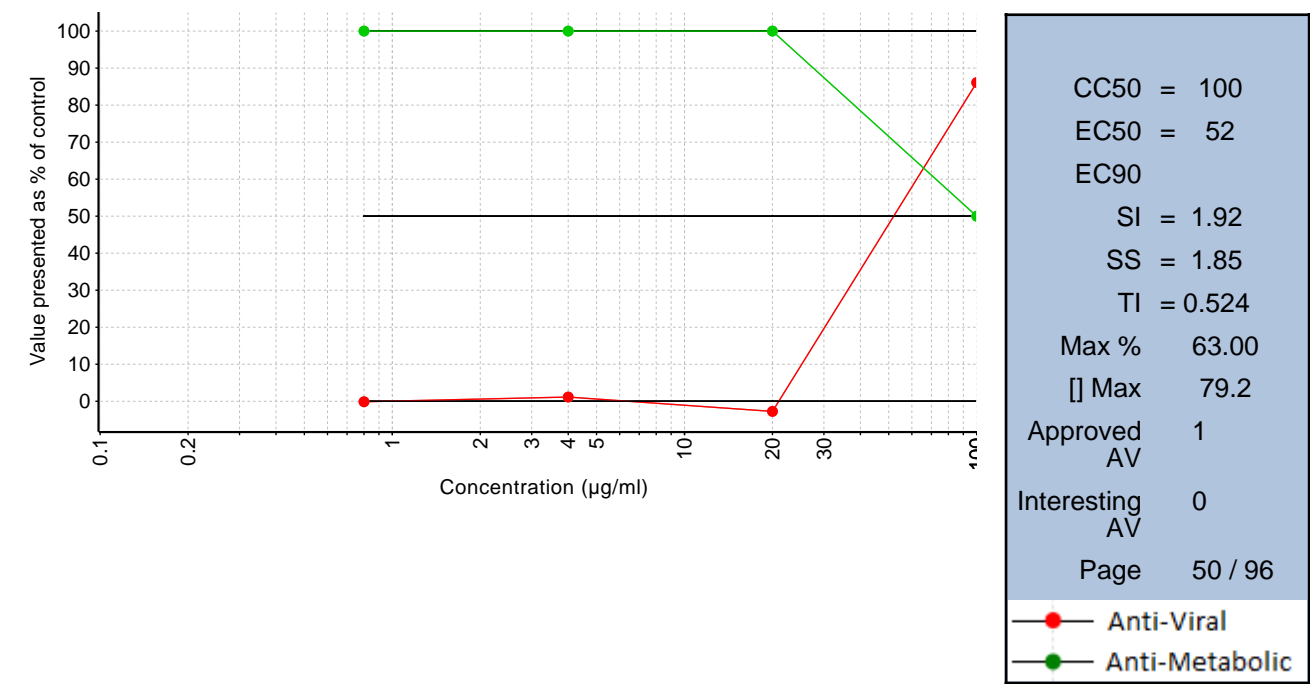

[Export chart data to CSV](#)

| Summary values |       |      |       |
|----------------|-------|------|-------|
| Statistic      | CC50  | EC50 | EC90  |
| Median         | = 100 | = 52 | > 100 |
| Med.Abs.Dev.   |       |      |       |
| Mean           | = 100 | = 52 | > 100 |
| Stdev.         |       |      |       |

| Compound       | Virus             |         |        | Cell |         | AV Method  |             | AM Method  |             |
|----------------|-------------------|---------|--------|------|---------|------------|-------------|------------|-------------|
| Primary code   | Species           | Type    | Strain | Type | Subtype | Method     | Type        | Method     | Type        |
| BAVAR IE1_0051 | Chikungunya virus | No Type | 899    | Vero | A       | Absorbance | MTS - 498nm | Microscopy | Tox scoring |

Needs more data.

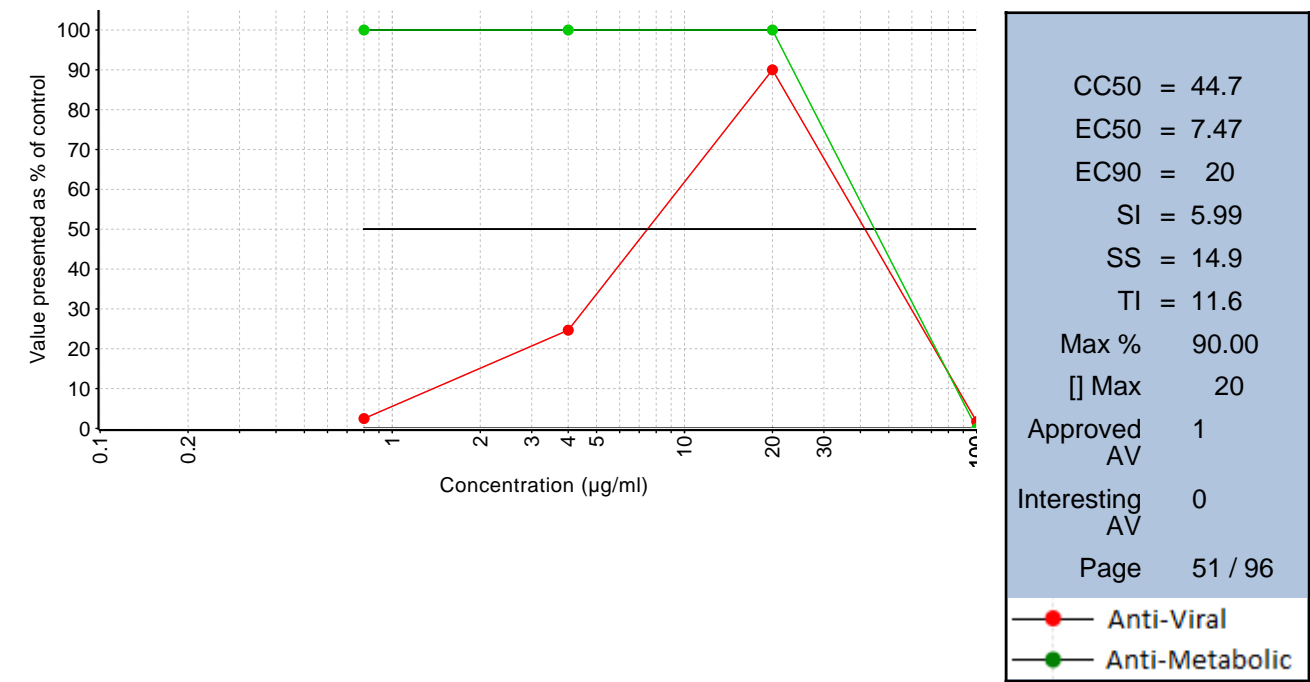

[Export chart data to CSV](#)

| Summary values |        |        |      |
|----------------|--------|--------|------|
| Statistic      | CC50   | EC50   | EC90 |
| Median         | = 43.1 | = 7.47 | = 20 |
| Med.Abs.Dev.   | 1.63   |        |      |
| Mean           | = 43.1 | = 7.47 | = 20 |
| Stdev.         | 2.3    |        |      |

| Compound       | Virus             |         |        | Cell |         | AV Method  |             | AM Method  |             |
|----------------|-------------------|---------|--------|------|---------|------------|-------------|------------|-------------|
| Primary code   | Species           | Type    | Strain | Type | Subtype | Method     | Type        | Method     | Type        |
| BAVAR IE1_0052 | Chikungunya virus | No Type | 899    | Vero | A       | Absorbance | MTS - 498nm | Microscopy | Tox scoring |

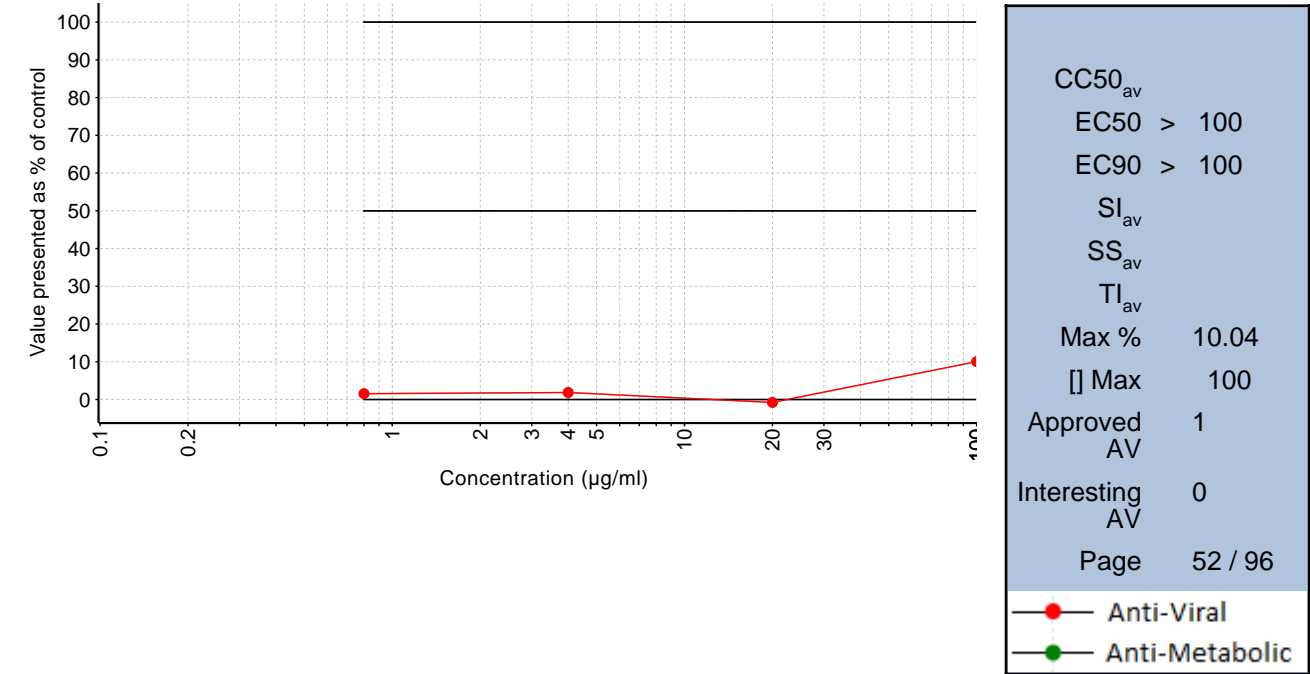

[Export chart data to CSV](#)

| Summary values |      |       |       |
|----------------|------|-------|-------|
| Statistic      | CC50 | EC50  | EC90  |
| Median         |      | > 100 | > 100 |
| Med.Abs.Dev.   |      |       |       |
| Mean           |      | > 100 | > 100 |
| Stdev.         |      |       |       |

| Compound       | Virus             |         |        | Cell |         | AV Method  |             | AM Method  |             |
|----------------|-------------------|---------|--------|------|---------|------------|-------------|------------|-------------|
| Primary code   | Species           | Type    | Strain | Type | Subtype | Method     | Type        | Method     | Type        |
| BAVAR IE1_0053 | Chikungunya virus | No Type | 899    | Vero | A       | Absorbance | MTS - 498nm | Microscopy | Tox scoring |

Needs more data.

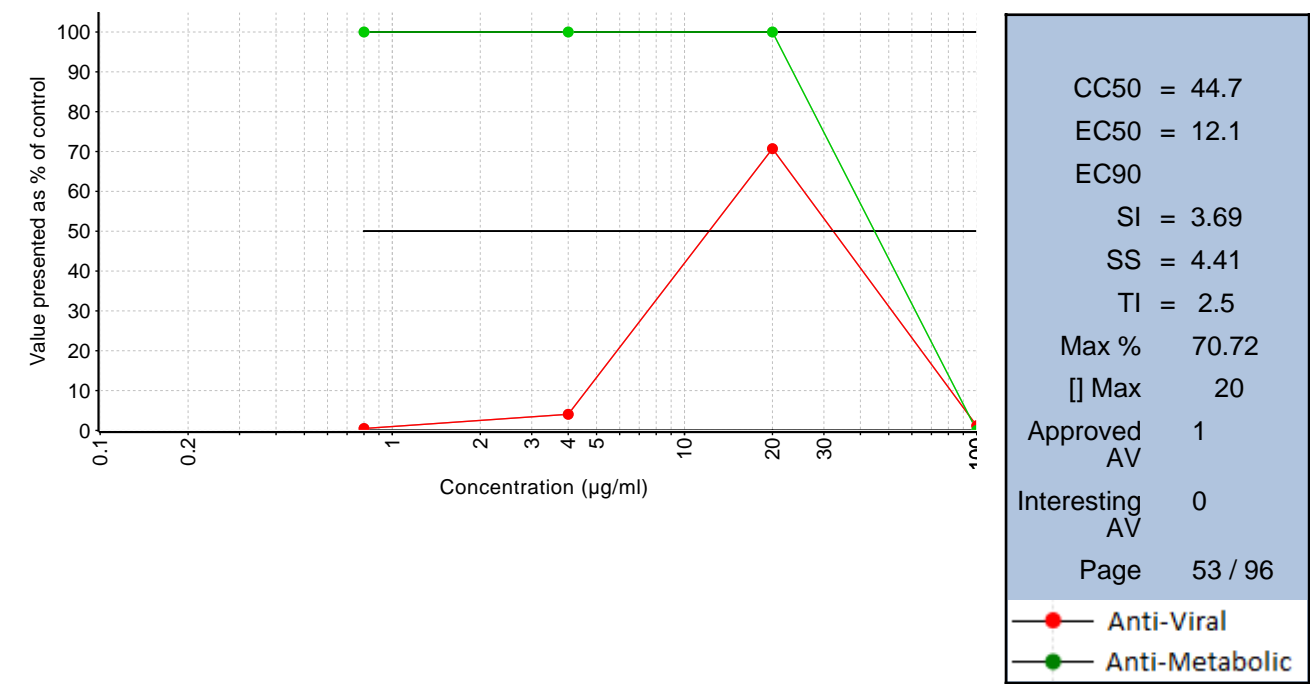

[Export chart data to CSV](#)

| Summary values |        |        |      |
|----------------|--------|--------|------|
| Statistic      | CC50   | EC50   | EC90 |
| Median         | = 38.5 | = 12.1 |      |
| Med.Abs.Dev.   | 6.21   |        |      |
| Mean           | = 38.5 | = 12.1 |      |
| Stdev.         | 8.78   |        |      |

| Compound       | Virus             |         |        | Cell |         | AV Method  |             | AM Method  |             |
|----------------|-------------------|---------|--------|------|---------|------------|-------------|------------|-------------|
| Primary code   | Species           | Type    | Strain | Type | Subtype | Method     | Type        | Method     | Type        |
| BAVAR IE1_0054 | Chikungunya virus | No Type | 899    | Vero | A       | Absorbance | MTS - 498nm | Microscopy | Tox scoring |

Needs more data.

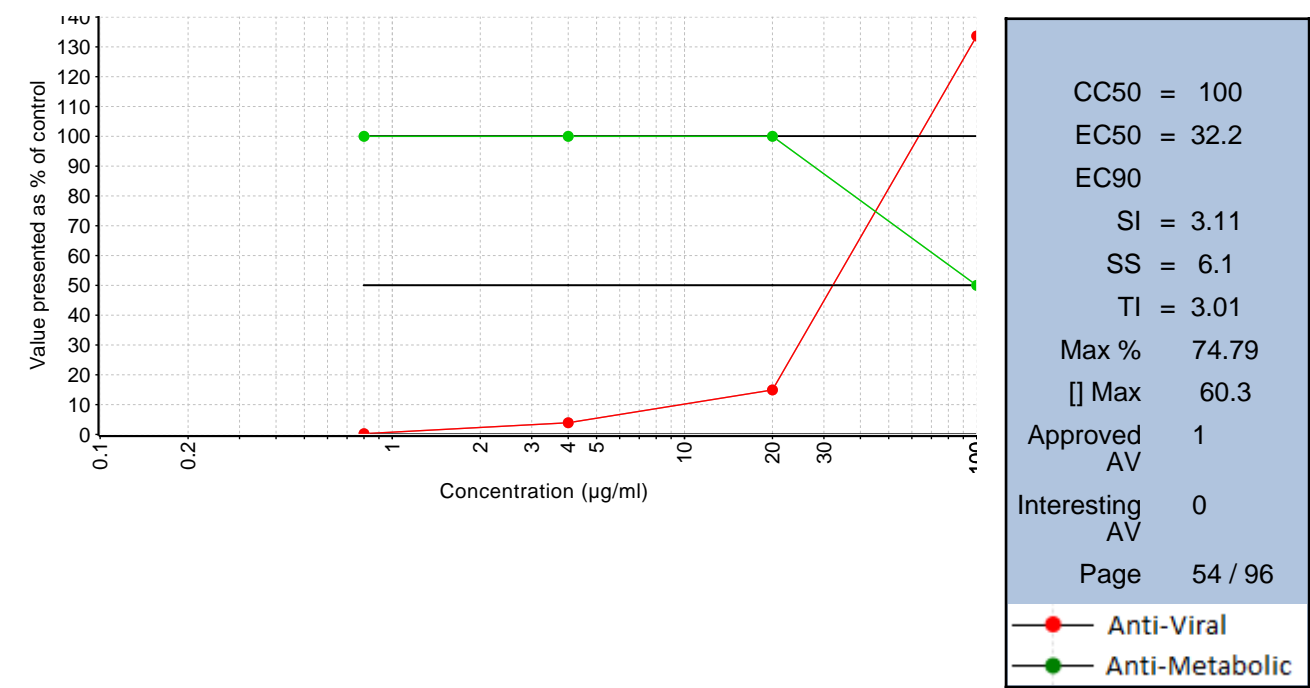

[Export chart data to CSV](#)

| Summary values |       |        |        |
|----------------|-------|--------|--------|
| Statistic      | CC50  | EC50   | EC90   |
| Median         | = 100 | = 32.2 | = 55.3 |
| Med.Abs.Dev.   |       |        |        |
| Mean           | = 100 | = 32.2 | = 55.3 |
| Stdev.         |       |        |        |

| Compound       | Virus             |         |        | Cell |         | AV Method  |             | AM Method  |             |
|----------------|-------------------|---------|--------|------|---------|------------|-------------|------------|-------------|
| Primary code   | Species           | Type    | Strain | Type | Subtype | Method     | Type        | Method     | Type        |
| BAVAR IE1_0055 | Chikungunya virus | No Type | 899    | Vero | A       | Absorbance | MTS - 498nm | Microscopy | Tox scoring |

Needs more data.

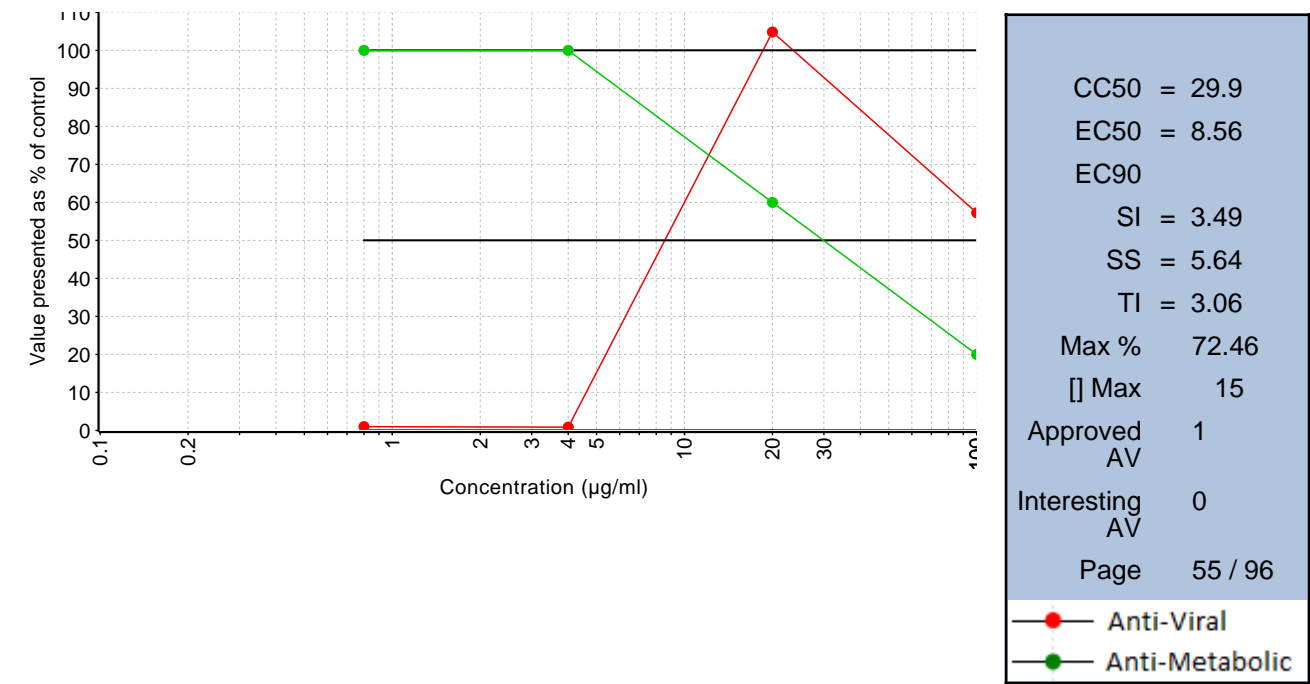

[Export chart data to CSV](#)

| Summary values |        |        |        |
|----------------|--------|--------|--------|
| Statistic      | CC50   | EC50   | EC90   |
| Median         | = 29.9 | = 8.56 | = 15.9 |
| Med.Abs.Dev.   |        |        |        |
| Mean           | = 29.9 | = 8.56 | = 15.9 |
| Stdev.         |        |        |        |



| Compound       | Virus             |         |        | Cell |         | AV Method  |             | AM Method  |             |
|----------------|-------------------|---------|--------|------|---------|------------|-------------|------------|-------------|
| Primary code   | Species           | Type    | Strain | Type | Subtype | Method     | Type        | Method     | Type        |
| BAVAR IE1_0056 | Chikungunya virus | No Type | 899    | Vero | A       | Absorbance | MTS - 498nm | Microscopy | Tox scoring |

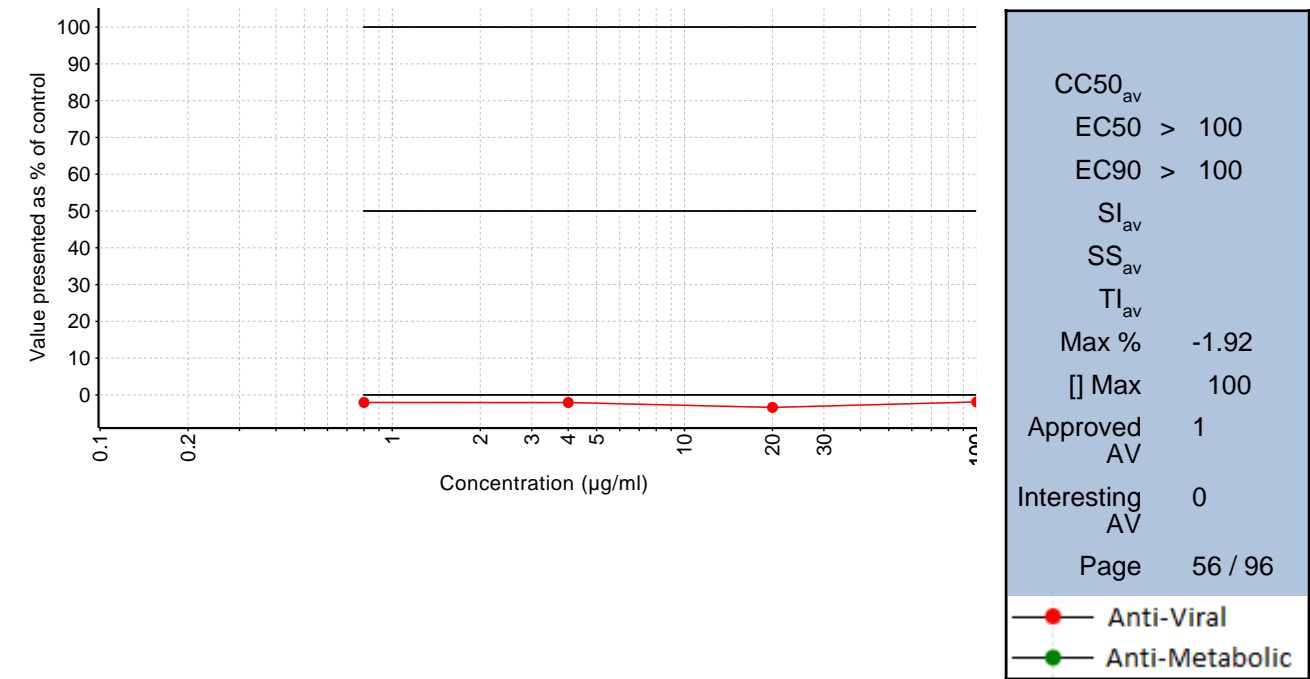

[Export chart data to CSV](#)

| Summary values |      |       |       |
|----------------|------|-------|-------|
| Statistic      | CC50 | EC50  | EC90  |
| Median         |      | > 100 | > 100 |
| Med.Abs.Dev.   |      |       |       |
| Mean           |      | > 100 | > 100 |
| Stdev.         |      |       |       |

| Compound       | Virus             |         |        | Cell |         | AV Method  |             | AM Method  |             |
|----------------|-------------------|---------|--------|------|---------|------------|-------------|------------|-------------|
| Primary code   | Species           | Type    | Strain | Type | Subtype | Method     | Type        | Method     | Type        |
| BAVAR IE1_0057 | Chikungunya virus | No Type | 899    | Vero | A       | Absorbance | MTS - 498nm | Microscopy | Tox scoring |

Needs more data.

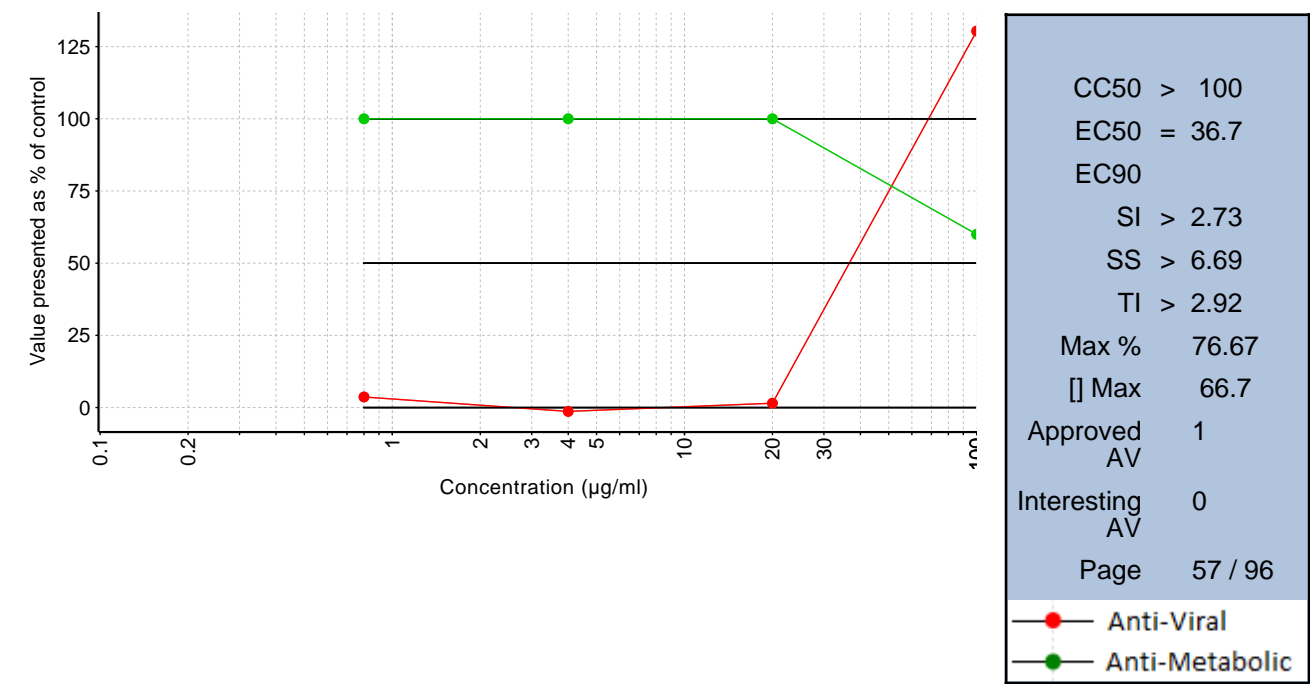

[Export chart data to CSV](#)

| Summary values |       |        |        |
|----------------|-------|--------|--------|
| Statistic      | CC50  | EC50   | EC90   |
| Median         | > 100 | = 36.7 | = 60.4 |
| Med.Abs.Dev.   |       |        |        |
| Mean           | > 100 | = 36.7 | = 60.4 |
| Stdev.         |       |        |        |

| Compound       | Virus             |         |        | Cell |         | AV Method  |             | AM Method  |             |
|----------------|-------------------|---------|--------|------|---------|------------|-------------|------------|-------------|
| Primary code   | Species           | Type    | Strain | Type | Subtype | Method     | Type        | Method     | Type        |
| BAVAR IE1_0058 | Chikungunya virus | No Type | 899    | Vero | A       | Absorbance | MTS - 498nm | Microscopy | Tox scoring |

Needs more data.

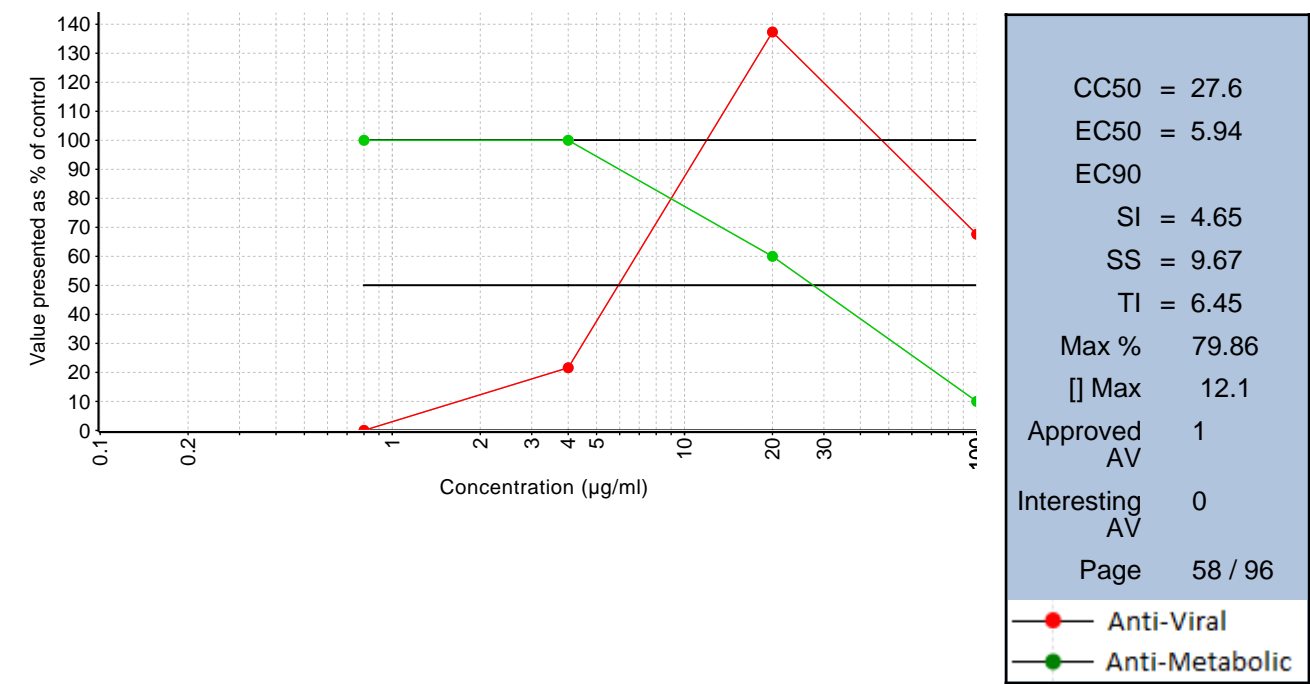

[Export chart data to CSV](#)

| Summary values |        |        |        |
|----------------|--------|--------|--------|
| Statistic      | CC50   | EC50   | EC90   |
| Median         | = 27.6 | = 5.94 | = 10.4 |
| Med.Abs.Dev.   |        |        |        |
| Mean           | = 27.6 | = 5.94 | = 10.4 |
| Stdev.         |        |        |        |

| Compound       | Virus             |         |        | Cell |         | AV Method  |             | AM Method  |             |
|----------------|-------------------|---------|--------|------|---------|------------|-------------|------------|-------------|
| Primary code   | Species           | Type    | Strain | Type | Subtype | Method     | Type        | Method     | Type        |
| BAVAR IE1_0059 | Chikungunya virus | No Type | 899    | Vero | A       | Absorbance | MTS - 498nm | Microscopy | Tox scoring |

Needs more data.

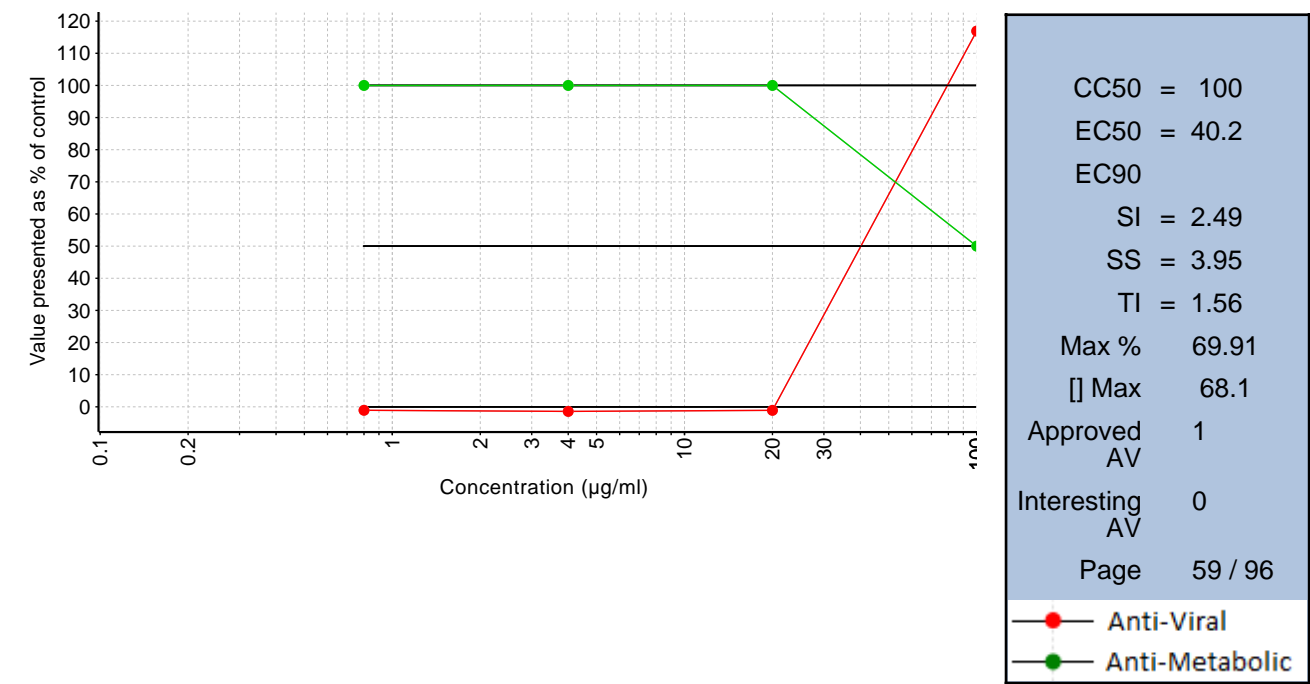

[Export chart data to CSV](#)

| Summary values |       |        |        |
|----------------|-------|--------|--------|
| Statistic      | CC50  | EC50   | EC90   |
| Median         | = 100 | = 40.2 | = 69.3 |
| Med.Abs.Dev.   |       |        |        |
| Mean           | = 100 | = 40.2 | = 69.3 |
| Stdev.         |       |        |        |

| Compound       | Virus             |         |        | Cell |         | AV Method  |             | AM Method  |             |
|----------------|-------------------|---------|--------|------|---------|------------|-------------|------------|-------------|
| Primary code   | Species           | Type    | Strain | Type | Subtype | Method     | Type        | Method     | Type        |
| BAVAR IE1_0060 | Chikungunya virus | No Type | 899    | Vero | A       | Absorbance | MTS - 498nm | Microscopy | Tox scoring |

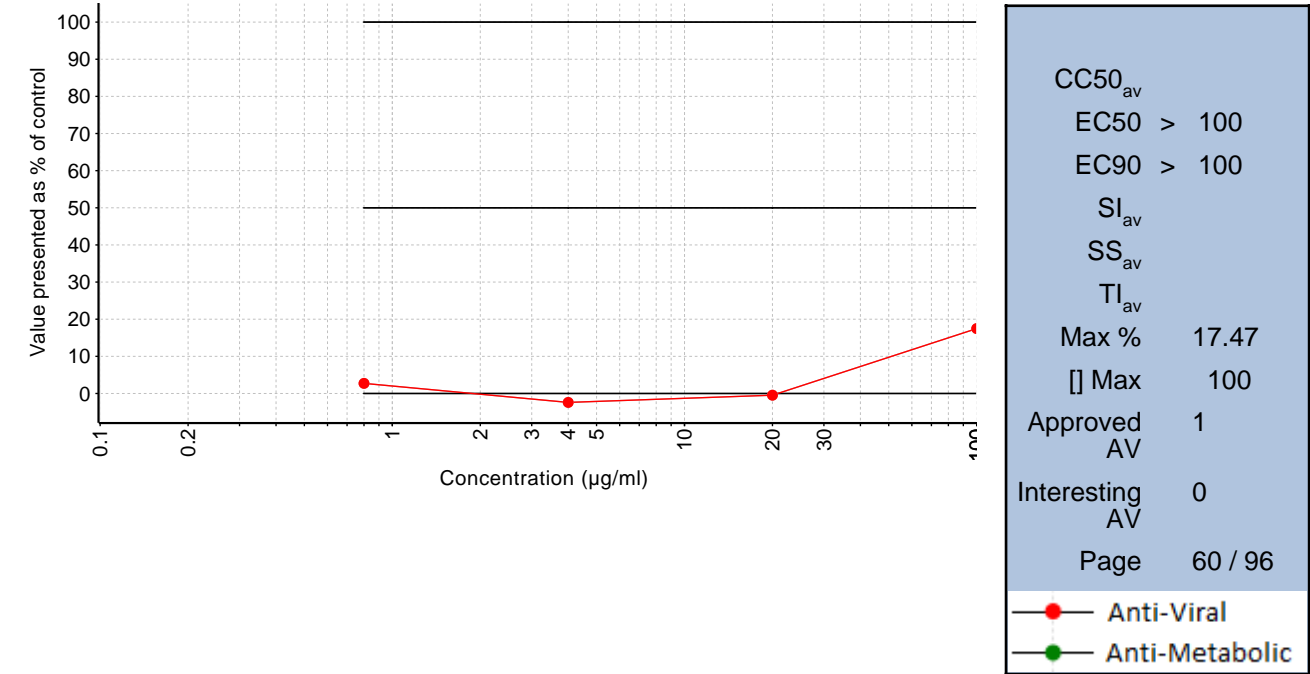

[Export chart data to CSV](#)

| Summary values |      |       |       |
|----------------|------|-------|-------|
| Statistic      | CC50 | EC50  | EC90  |
| Median         |      | > 100 | > 100 |
| Med.Abs.Dev.   |      |       |       |
| Mean           |      | > 100 | > 100 |
| Stdev.         |      |       |       |

# Repeated experiment on Chikungunya virus (select)

| Compound       | Virus             |         |        | Cell |         | AV Method  |             | AM Method  |             |
|----------------|-------------------|---------|--------|------|---------|------------|-------------|------------|-------------|
| Primary code   | Species           | Type    | Strain | Type | Subtype | Method     | Type        | Method     | Type        |
| BAVAR IE1_0004 | Chikungunya virus | No Type | 899    | Vero | A       | Absorbance | MTS - 498nm | Microscopy | Tox scoring |

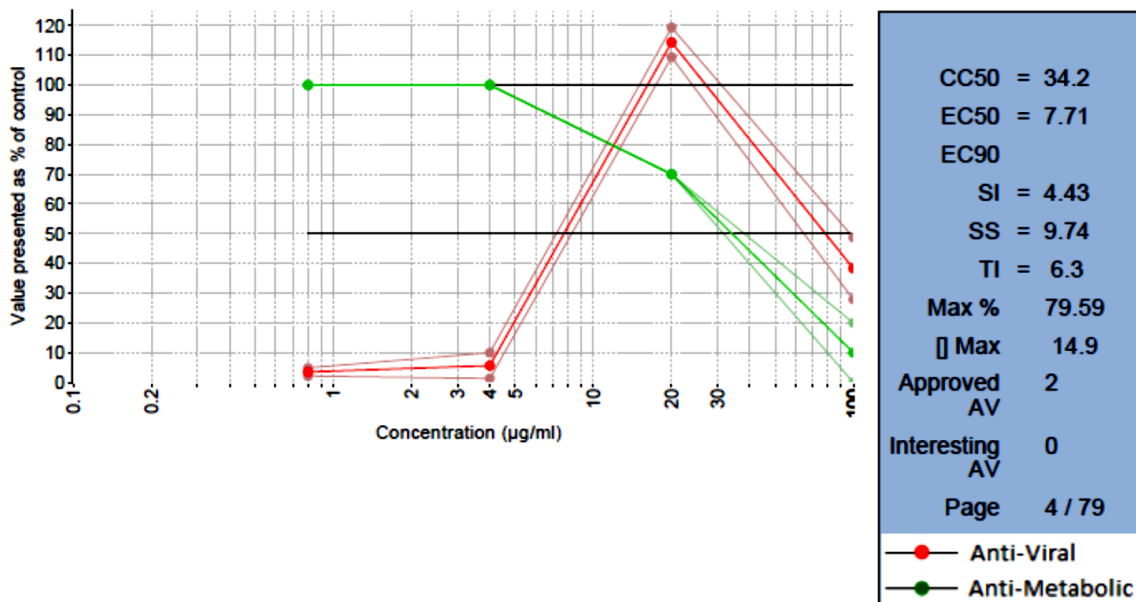

[Export chart data to CSV](#)

| Summary values |        |        |       |
|----------------|--------|--------|-------|
| Statistic      | CC50   | EC50   | EC90  |
| Median         | = 51.3 | = 7.73 | = 14  |
| Med.Abs.Dev.   | 16.5   | 0.525  | 0.999 |
| Mean           | = 57.9 | = 7.73 | = 14  |
| Stdev.         | 29.8   | 0.742  | 1.41  |

| Compound       | Virus             |         |        | Cell |         | AV Method  |             | AM Method  |             |
|----------------|-------------------|---------|--------|------|---------|------------|-------------|------------|-------------|
| Primary code   | Species           | Type    | Strain | Type | Subtype | Method     | Type        | Method     | Type        |
| BAVAR IE1_0007 | Chikungunya virus | No Type | 899    | Vero | A       | Absorbance | MTS - 498nm | Microscopy | Tox scoring |

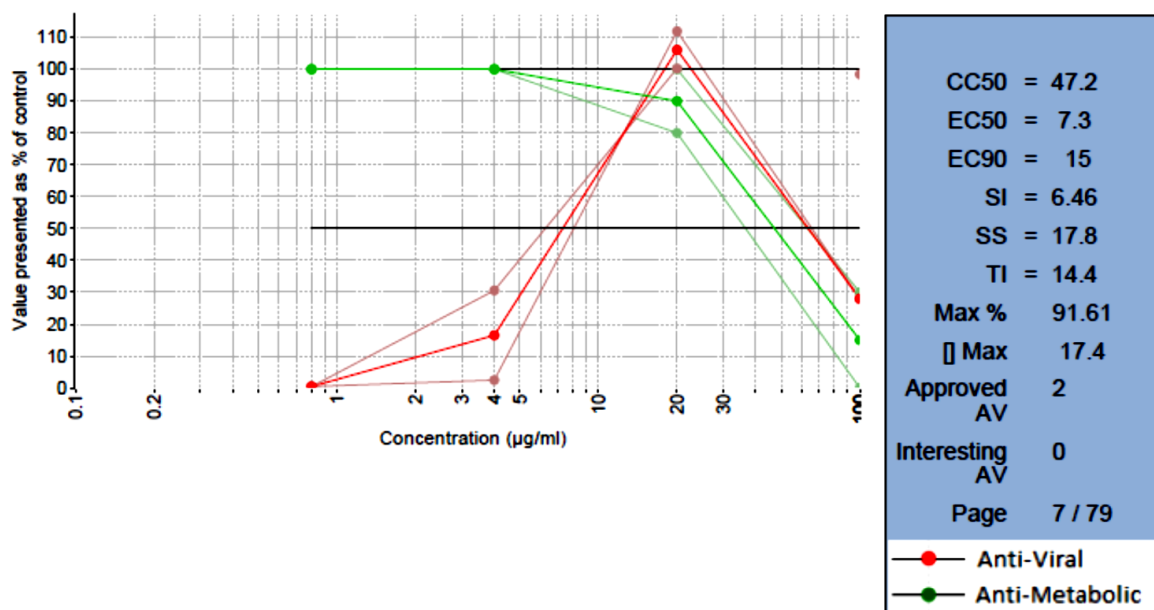

[Export chart data to CSV](#)

| Summary values |        |        |        |
|----------------|--------|--------|--------|
| Statistic      | CC50   | EC50   | EC90   |
| Median         | = 63.1 | = 7.16 | = 15.1 |
| Med.Abs.Dev.   | 2.4    | 0.891  | 0.647  |
| Mean           | = 55.1 | = 7.16 | = 15.1 |
| Stdev.         | 16.1   | 1.26   | 0.915  |

| Compound       | Virus             |         |        | Cell |         | AV Method  |             | AM Method  |             |
|----------------|-------------------|---------|--------|------|---------|------------|-------------|------------|-------------|
| Primary code   | Species           | Type    | Strain | Type | Subtype | Method     | Type        | Method     | Type        |
| BAVAR IE1_0013 | Chikungunya virus | No Type | 899    | Vero | A       | Absorbance | MTS - 498nm | Microscopy | Tox scoring |

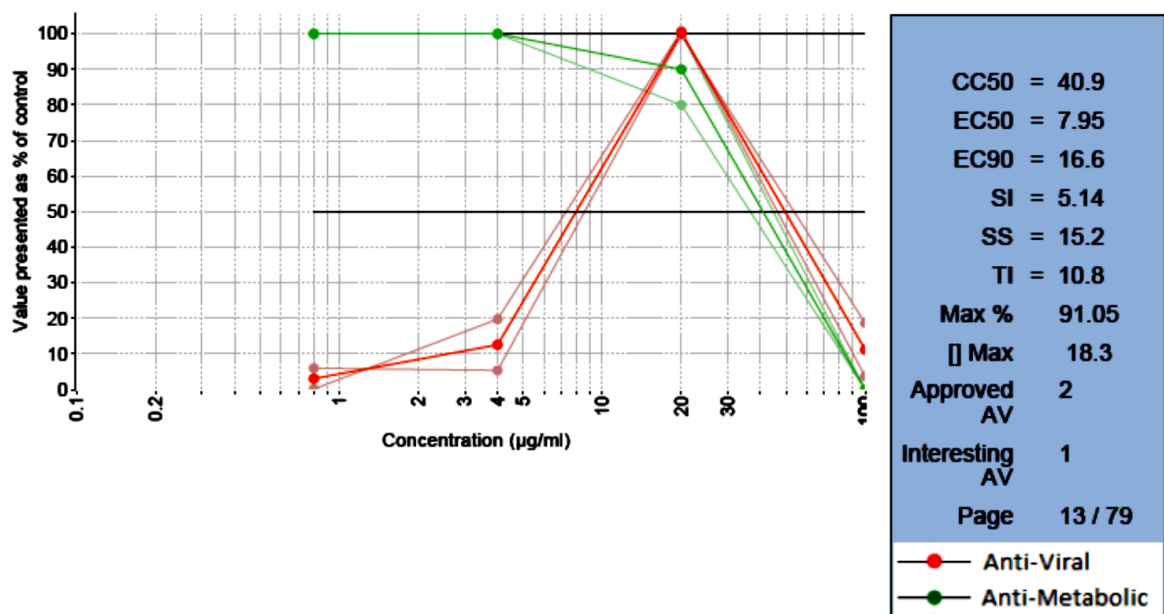

[Export chart data to CSV](#)

| Summary values |        |        |        |
|----------------|--------|--------|--------|
| Statistic      | CC50   | EC50   | EC90   |
| Median         | = 45.6 | = 7.93 | = 16.6 |
| Med.Abs.Dev.   | 4.48   | 0.638  | 0.409  |
| Mean           | = 45.3 | = 7.93 | = 16.6 |
| Stdev.         | 7.02   | 0.902  | 0.579  |



| Compound       | Virus             |         |        | Cell |         | AV Method  |             | AM Method  |             |
|----------------|-------------------|---------|--------|------|---------|------------|-------------|------------|-------------|
| Primary code   | Species           | Type    | Strain | Type | Subtype | Method     | Type        | Method     | Type        |
| BAVAR IE1_0016 | Chikungunya virus | No Type | 899    | Vero | A       | Absorbance | MTS - 498nm | Microscopy | Tox scoring |

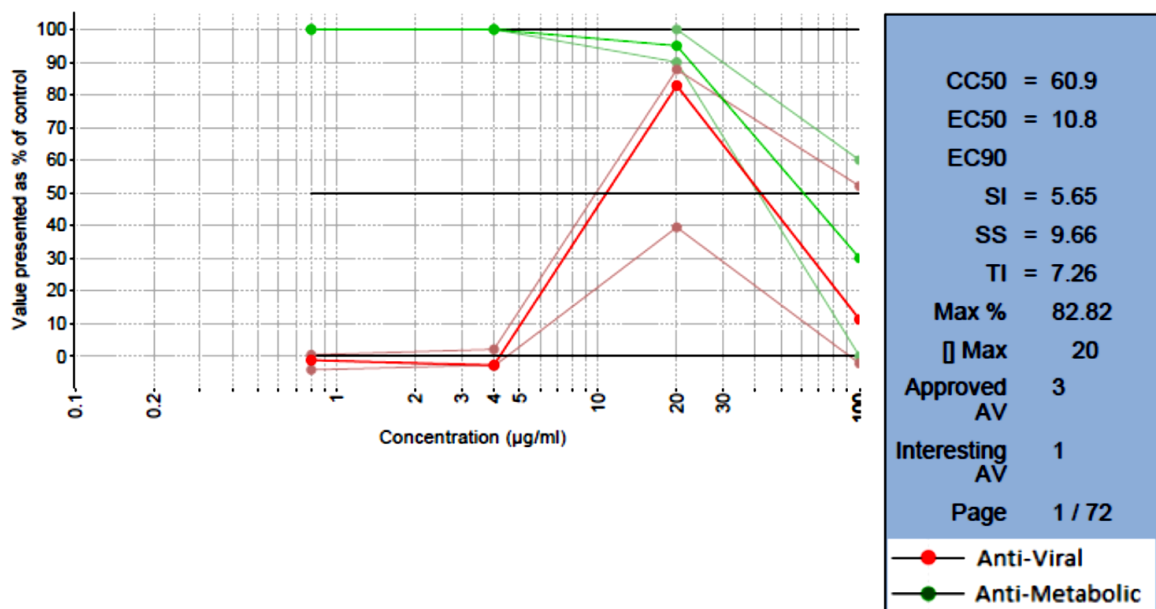

[Export chart data to CSV](#)

| Summary values |        |        |      |
|----------------|--------|--------|------|
| Statistic      | CC50   | EC50   | EC90 |
| Median         | = 41.4 | = 10.3 |      |
| Med.Abs.Dev.   | 0.466  | 0.472  |      |
| Mean           | = 41.4 | = 10.3 |      |
| Stdev.         | 0.659  | 0.667  |      |

| Compound       | Virus             |         |        | Cell |         | AV Method  |             | AM Method  |             |
|----------------|-------------------|---------|--------|------|---------|------------|-------------|------------|-------------|
| Primary code   | Species           | Type    | Strain | Type | Subtype | Method     | Type        | Method     | Type        |
| BAVAR IE1_0019 | Chikungunya virus | No Type | 899    | Vero | A       | Absorbance | MTS - 498nm | Microscopy | Tox scoring |

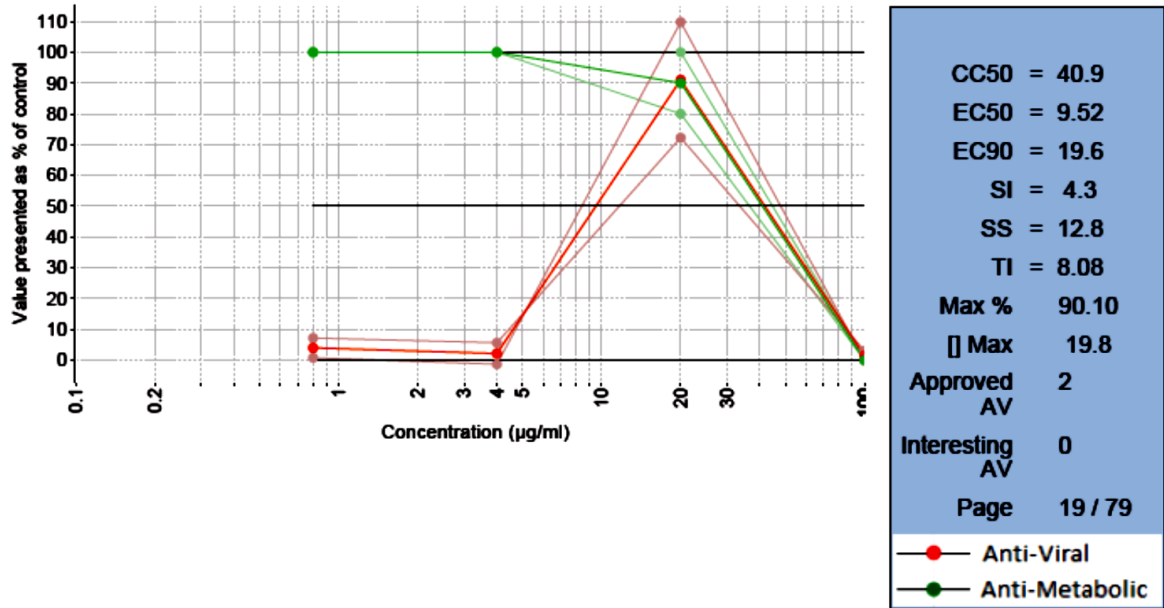

[Export chart data to CSV](#)

| Summary values |        |        |      |
|----------------|--------|--------|------|
| Statistic      | CC50   | EC50   | EC90 |
| Median         | = 40.6 | = 10.1 | = 15 |
| Med.Abs.Dev.   | 5.59   | 1.64   |      |
| Mean           | = 40.7 | = 10.1 | = 15 |
| Stdev.         | 6.77   | 2.31   |      |

| Compound       | Virus             |         |        | Cell |         | AV Method  |             | AM Method  |             |
|----------------|-------------------|---------|--------|------|---------|------------|-------------|------------|-------------|
| Primary code   | Species           | Type    | Strain | Type | Subtype | Method     | Type        | Method     | Type        |
| BAVAR IE1_0022 | Chikungunya virus | No Type | 899    | Vero | A       | Absorbance | MTS - 498nm | Microscopy | Tox scoring |

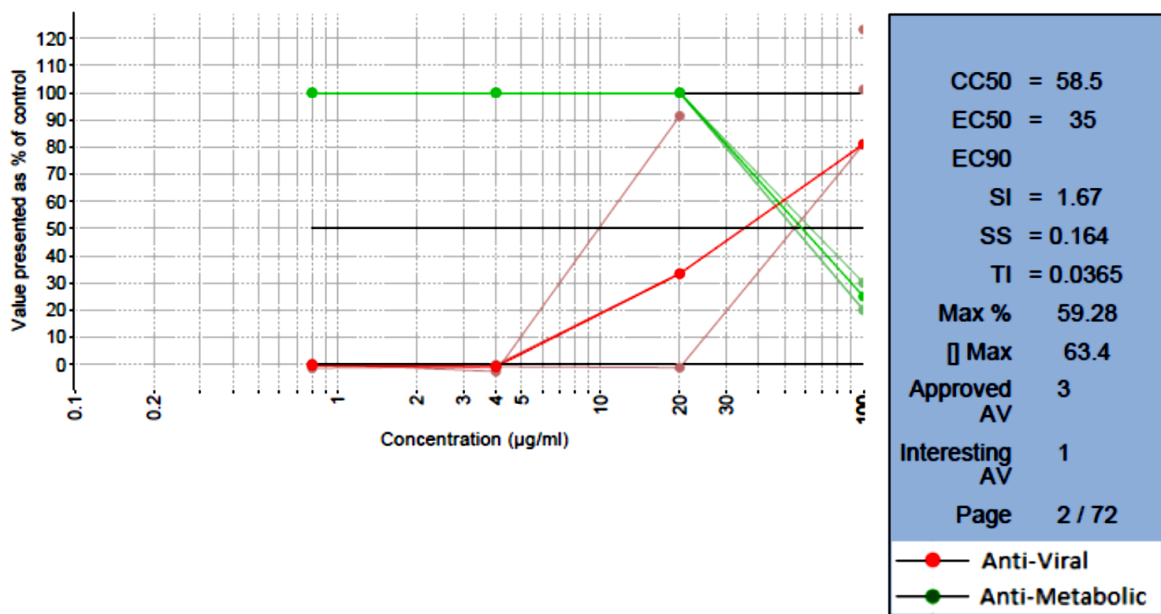

[Export chart data to CSV](#)

| Summary values |        |        |        |
|----------------|--------|--------|--------|
| Statistic      | CC50   | EC50   | EC90   |
| Median         | = 58.9 | = 32.2 | = 19.5 |
| Med.Abs.Dev.   | 4.23   | 22.3   |        |
| Mean           | = 58.9 | = 32.2 | = 19.5 |
| Stdev.         | 4.88   | 31.6   |        |

| Compound       | Virus             |         |        | Cell |         | AV Method  |             | AM Method  |             |
|----------------|-------------------|---------|--------|------|---------|------------|-------------|------------|-------------|
| Primary code   | Species           | Type    | Strain | Type | Subtype | Method     | Type        | Method     | Type        |
| BAVAR IE1_0025 | Chikungunya virus | No Type | 899    | Vero | A       | Absorbance | MTS - 498nm | Microscopy | Tox scoring |

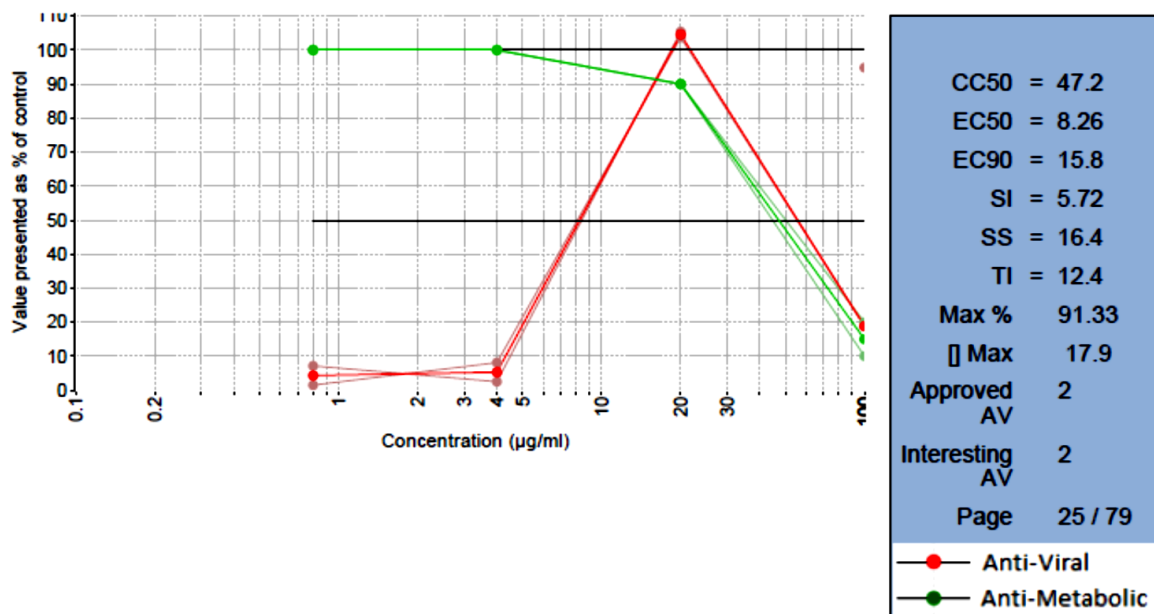

[Export chart data to CSV](#)

| Summary values |        |        |        |
|----------------|--------|--------|--------|
| Statistic      | CC50   | EC50   | EC90   |
| Median         | = 50.2 | = 8.25 | = 15.8 |
| Med.Abs.Dev.   | 5.21   | 0.155  | 0.0801 |
| Mean           | = 50.1 | = 8.25 | = 15.8 |
| Stdev.         | 5.33   | 0.219  | 0.113  |

| Compound       | Virus             |         |        | Cell |         | AV Method  |             | AM Method  |             |
|----------------|-------------------|---------|--------|------|---------|------------|-------------|------------|-------------|
| Primary code   | Species           | Type    | Strain | Type | Subtype | Method     | Type        | Method     | Type        |
| BAVAR IE1_0028 | Chikungunya virus | No Type | 899    | Vero | A       | Absorbance | MTS - 498nm | Microscopy | Tox scoring |

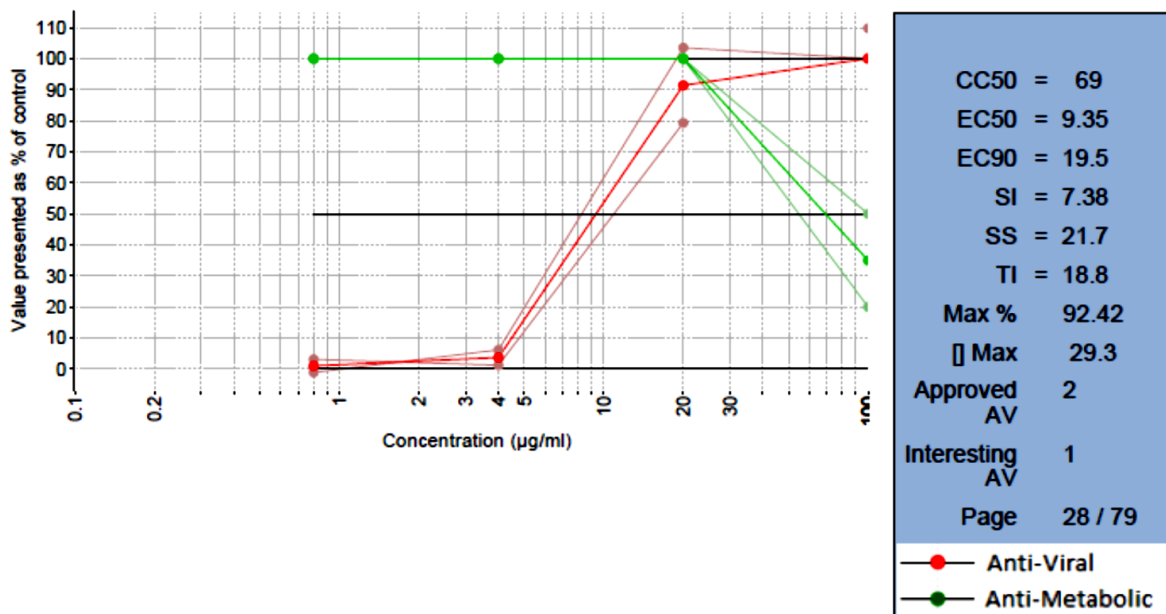

[Export chart data to CSV](#)

| Summary values |        |        |      |
|----------------|--------|--------|------|
| Statistic      | CC50   | EC50   | EC90 |
| Median         | = 77.3 | = 9.59 | = 16 |
| Med.Abs.Dev.   | 22.7   | 1.34   |      |
| Mean           | = 77.3 | = 9.59 | = 16 |
| Stdev.         | 32     | 1.89   |      |

| Compound       | Virus             |         |        | Cell |         | AV Method  |             | AM Method  |             |
|----------------|-------------------|---------|--------|------|---------|------------|-------------|------------|-------------|
| Primary code   | Species           | Type    | Strain | Type | Subtype | Method     | Type        | Method     | Type        |
| BAVAR IE1_0034 | Chikungunya virus | No Type | 899    | Vero | A       | Absorbance | MTS - 498nm | Microscopy | Tox scoring |

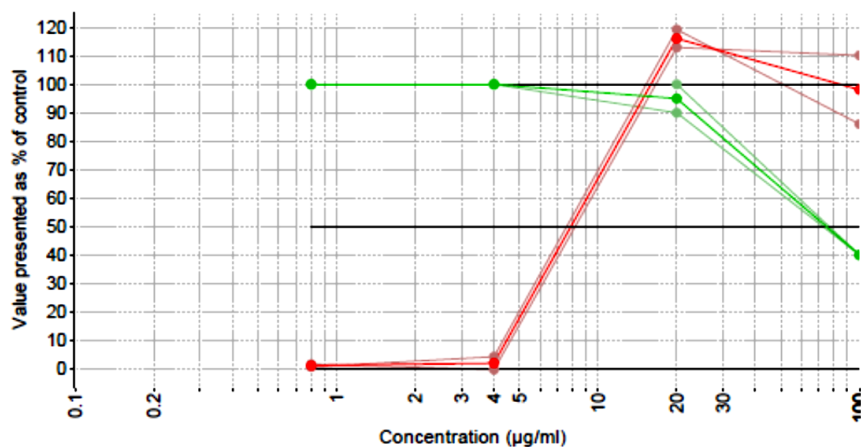

|                |                |
|----------------|----------------|
| CC50           | = 74.6         |
| EC50           | = 7.87         |
| EC90           | = 13.8         |
| SI             | = 9.48         |
| SS             | = 23.6         |
| TI             | = 23.1         |
| Max %          | 95.89          |
| □ Max          | 17.2           |
| Approved AV    | 2              |
| Interesting AV | 2              |
| Page           | 34 / 79        |
| ●              | Anti-Viral     |
| ●              | Anti-Metabolic |

[Export chart data to CSV](#)

| Summary values |        |        |        |
|----------------|--------|--------|--------|
| Statistic      | CC50   | EC50   | EC90   |
| Median         | = 74.5 | = 7.88 | = 13.9 |
| Med.Abs.Dev.   | 2      | 0.294  | 0.576  |
| Mean           | = 74.5 | = 7.88 | = 13.9 |
| Stdev.         | 2.82   | 0.416  | 0.815  |

| Compound       | Virus             |         |        | Cell |         | AV Method  |             | AM Method  |             |
|----------------|-------------------|---------|--------|------|---------|------------|-------------|------------|-------------|
| Primary code   | Species           | Type    | Strain | Type | Subtype | Method     | Type        | Method     | Type        |
| BAVAR IE1_0046 | Chikungunya virus | No Type | 899    | Vero | A       | Absorbance | MTS - 498nm | Microscopy | Tox scoring |

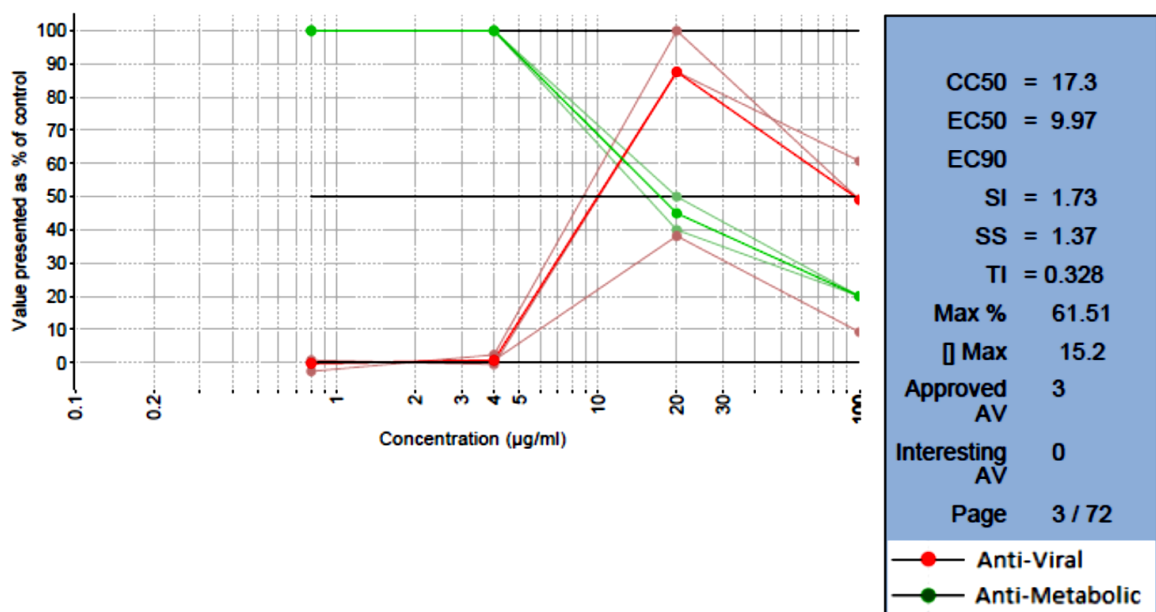

[Export chart data to CSV](#)

| Summary values |        |        |      |
|----------------|--------|--------|------|
| Statistic      | CC50   | EC50   | EC90 |
| Median         | = 20   | = 9.42 | = 17 |
| Med.Abs.Dev.   | 4.71   | 0.647  |      |
| Mean           | = 44.1 | = 9.42 | = 17 |
| Stdev.         | 45.9   | 0.915  |      |

| Compound       | Virus             |         |        | Cell |         | AV Method  |             | AM Method  |             |
|----------------|-------------------|---------|--------|------|---------|------------|-------------|------------|-------------|
| Primary code   | Species           | Type    | Strain | Type | Subtype | Method     | Type        | Method     | Type        |
| BAVAR IE1_0048 | Chikungunya virus | No Type | 899    | Vero | A       | Absorbance | MTS - 498nm | Microscopy | Tox scoring |

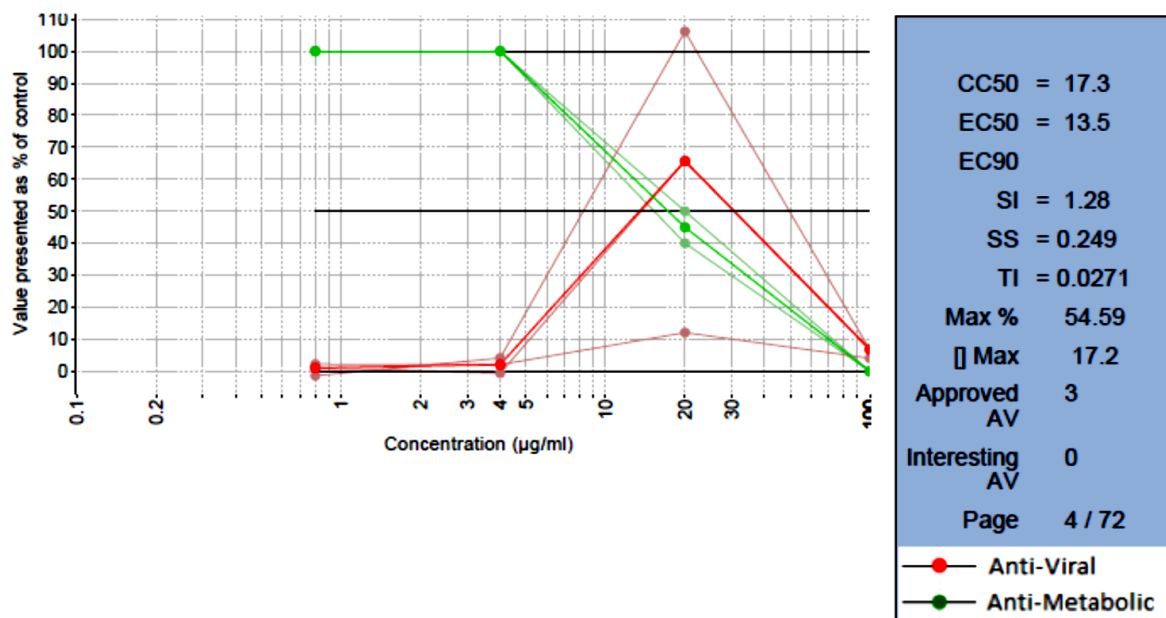

[Export chart data to CSV](#)

| Summary values |        |      |        |
|----------------|--------|------|--------|
| Statistic      | CC50   | EC50 | EC90   |
| Median         | = 25.4 | = 11 | = 15.5 |
| Med.Abs.Dev.   | 7.72   | 2.71 |        |
| Mean           | = 28.9 | = 11 | = 15.5 |
| Stdev.         | 15.3   | 3.83 |        |



| Compound       | Virus             |         |        | Cell |         | AV Method  |             | AM Method  |             |
|----------------|-------------------|---------|--------|------|---------|------------|-------------|------------|-------------|
| Primary code   | Species           | Type    | Strain | Type | Subtype | Method     | Type        | Method     | Type        |
| BAVAR IE1_0049 | Chikungunya virus | No Type | 899    | Vero | A       | Absorbance | MTS - 498nm | Microscopy | Tox scoring |

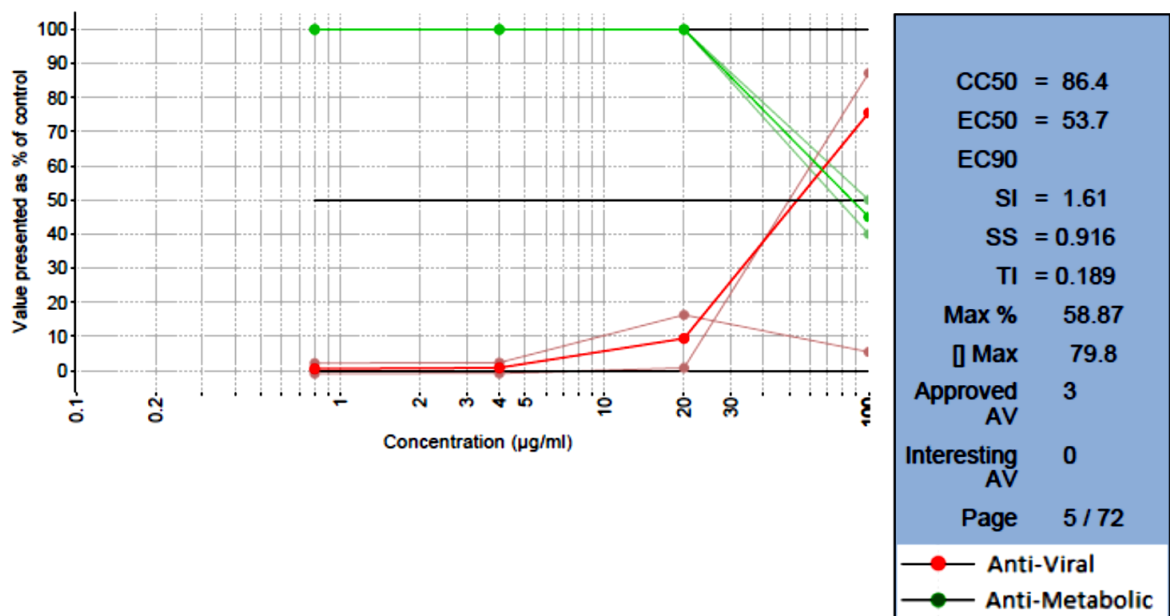

[Export chart data to CSV](#)

| Summary values |        |        |       |
|----------------|--------|--------|-------|
| Statistic      | CC50   | EC50   | EC90  |
| Median         | = 88.2 | = 51.9 | > 100 |
| Med.Abs.Dev.   | 11.8   | 1.84   |       |
| Mean           | = 88.2 | = 51.9 | > 100 |
| Stdev.         | 16.6   | 2.6    |       |

| Compound       | Virus             |         |        | Cell |         | AV Method  |             | AM Method  |             |
|----------------|-------------------|---------|--------|------|---------|------------|-------------|------------|-------------|
| Primary code   | Species           | Type    | Strain | Type | Subtype | Method     | Type        | Method     | Type        |
| BAVAR IE1_0058 | Chikungunya virus | No Type | 899    | Vero | A       | Absorbance | MTS - 498nm | Microscopy | Tox scoring |

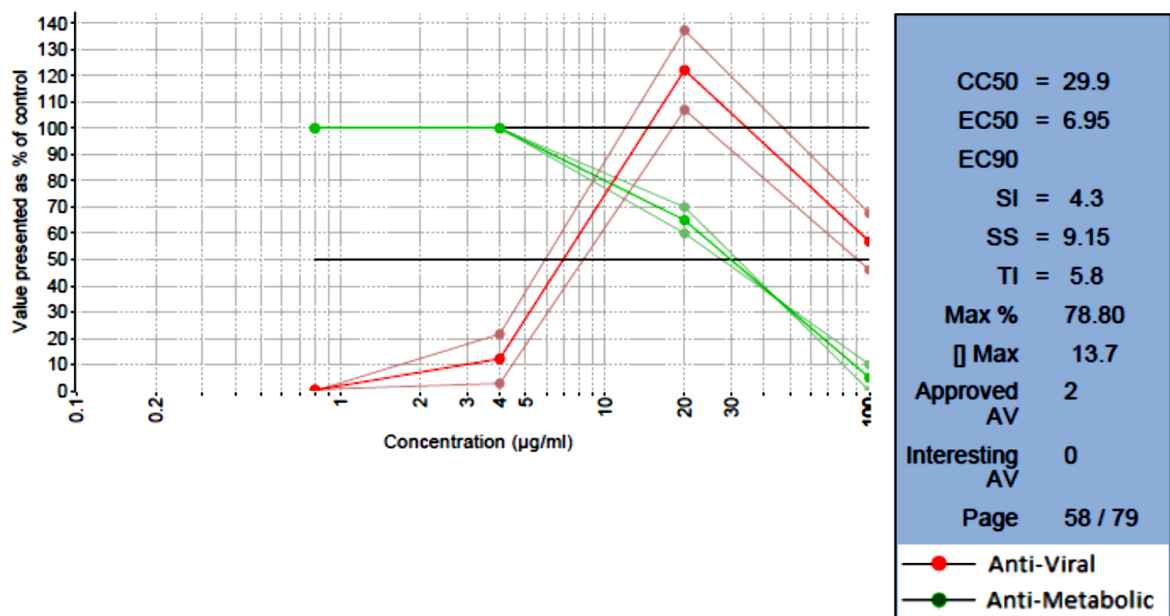

[Export chart data to CSV](#)

| Summary values |        |        |        |
|----------------|--------|--------|--------|
| Statistic      | CC50   | EC50   | EC90   |
| Median         | = 31.7 | = 7.11 | = 12.9 |
| Med.Abs.Dev.   | 4.08   | 1.18   | 2.51   |
| Mean           | = 49.8 | = 7.11 | = 12.9 |
| Stdev.         | 35     | 1.66   | 3.55   |

| Compound       | Virus             |         |        | Cell |         | AV Method  |             | AM Method  |             |
|----------------|-------------------|---------|--------|------|---------|------------|-------------|------------|-------------|
| Primary code   | Species           | Type    | Strain | Type | Subtype | Method     | Type        | Method     | Type        |
| BAVAR IE1_0100 | Chikungunya virus | No Type | 899    | Vero | A       | Absorbance | MTS - 498nm | Microscopy | Tox scoring |

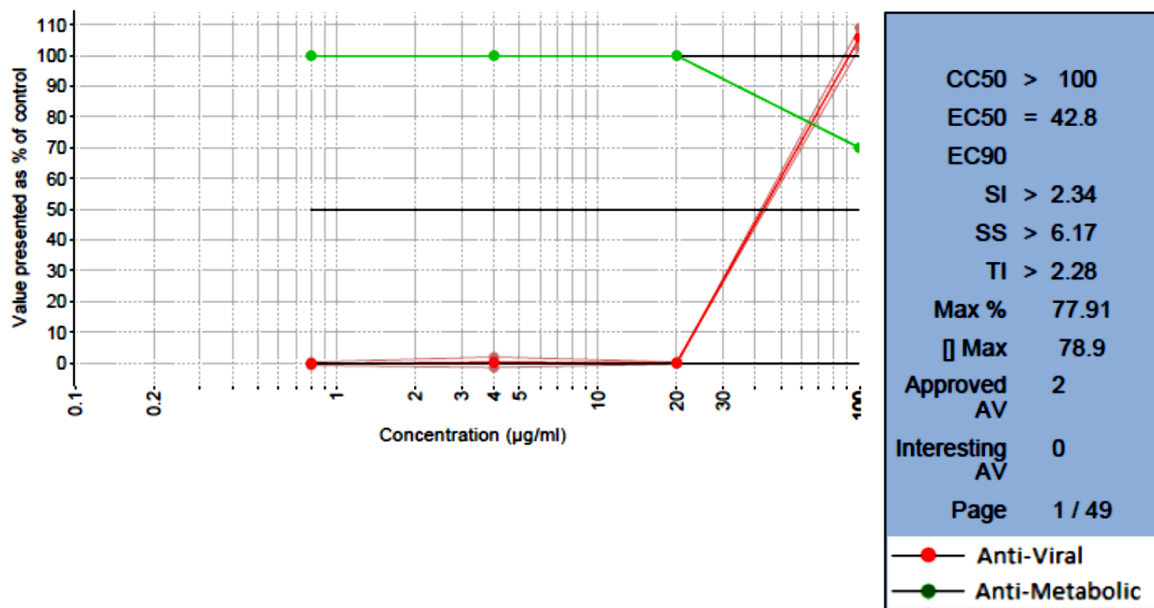

[Export chart data to CSV](#)

| Summary values |       |        |        |
|----------------|-------|--------|--------|
| Statistic      | CC50  | EC50   | EC90   |
| Median         | > 100 | = 42.8 | = 78.8 |
| Med.Abs.Dev.   |       | 0.9    | 3.28   |
| Mean           | > 100 | = 42.8 | = 78.8 |
| Stdev.         |       | 1.27   | 4.64   |
