# Supplementary material for: Antiviral and Cytotoxic Activity of Different Plant Parts of Banana (Musa spp.)
Source: MDPI journal article supplement (doi:10.3390/v12050549), 2020-05-15
Supplement: s1 [file s1]

# Antiviral and Cytotoxic Activity of Different Plant Parts of Banana (*Musa* spp.)

Sujogya Kumar Panda <sup>1,2,\*</sup>, Ana Hortência Fonsêca Castro <sup>1,3</sup>, Ramin Saleh Jouneghani <sup>1</sup>,  
Pieter Leyssen <sup>4</sup>, Johan Neyts <sup>4</sup>, Rony Swennen <sup>5,6,7</sup> and Walter Luyten <sup>1</sup>

- <sup>1</sup> Department of Biology, Katholieke Universiteit Leuven, 3000 Leuven, Belgium;  
acastro905@gmail.com (A.H.F.C.); r.saleh.j@gmail.com (R.S.J.); walter.luyten@kuleuven.be (W.L.)
- <sup>2</sup> Mayurbhanj Biological Research (MBR), Bhanjpur, Baripada 757002, Odisha, India
- <sup>3</sup> Plant Physiology and Biochemistry, Universidade Federal de São João Del-Rei, Av. Sebastião  
Gonçalves Coelho, 400—Chanandour, Divinópolis MG 35501-296, Brazil
- <sup>4</sup> Rega Institute for Medical Research, Laboratory of Virology and Chemotherapy, Katholieke  
Universiteit Leuven, 3000 Leuven, Belgium; pieter.leyssen@kuleuven.be (P.L.);  
johan.neyts@kuleuven.be (J.N.)
- <sup>5</sup> International Institute of Tropical Agriculture, Arusha P.O. Box 447, Tanzania;  
rony.swennen@kuleuven.be
- <sup>6</sup> Laboratory of Tropical Crop Improvement, Division of Crop Biotechnics, Katholieke Universiteit  
Leuven, 3001 Leuven, Belgium
- <sup>7</sup> Bioversity International, 3001 Leuven, Belgium
- \* Correspondence: sujogya.panda@kuleuven.be; Tel.: +32-16-373467

## Supplementary material III

Figure S3: Antiviral activity of extracts against yellow fever virus. Extracts (primary code) tested mentioned under the header compounds in each panel. EC<sub>50</sub> = 50% Effective Concentration (concentration at which 50% inhibition of virus replication is observed); EC<sub>90</sub> = 90% Effective Concentration (concentration at which 90% inhibition of virus replication is observed); CC<sub>50</sub> = 50% Cytostatic/Cytotoxic Concentration (concentration at which 50% adverse effect is observed on Huh cells in parallel with antiviral assay); SI = Selectivity Index (CC<sub>50</sub>/EC<sub>50</sub>); SS = Selectivity Surface (integrated surface delineated by the EC<sub>50</sub> curve, the CC<sub>50</sub> curve and the 50% horizontal); TI = Therapeutic Index (SS × 10logSI); AV-Antiviral; AM-Antimetabolic.

| Compound      | Virus              |         |             | Cell |         | AV Method  |             | AM Method  |             |
|---------------|--------------------|---------|-------------|------|---------|------------|-------------|------------|-------------|
| Primary code  | Species            | Type    | Strain      | Type | Subtype | Method     | Type        | Method     | Type        |
| BAVAR IE1_001 | Yellow fever virus | No Type | 17D Stamari | Huh  | 7       | Absorbance | MTS - 498nm | Microscopy | Tox scoring |

Needs more data.

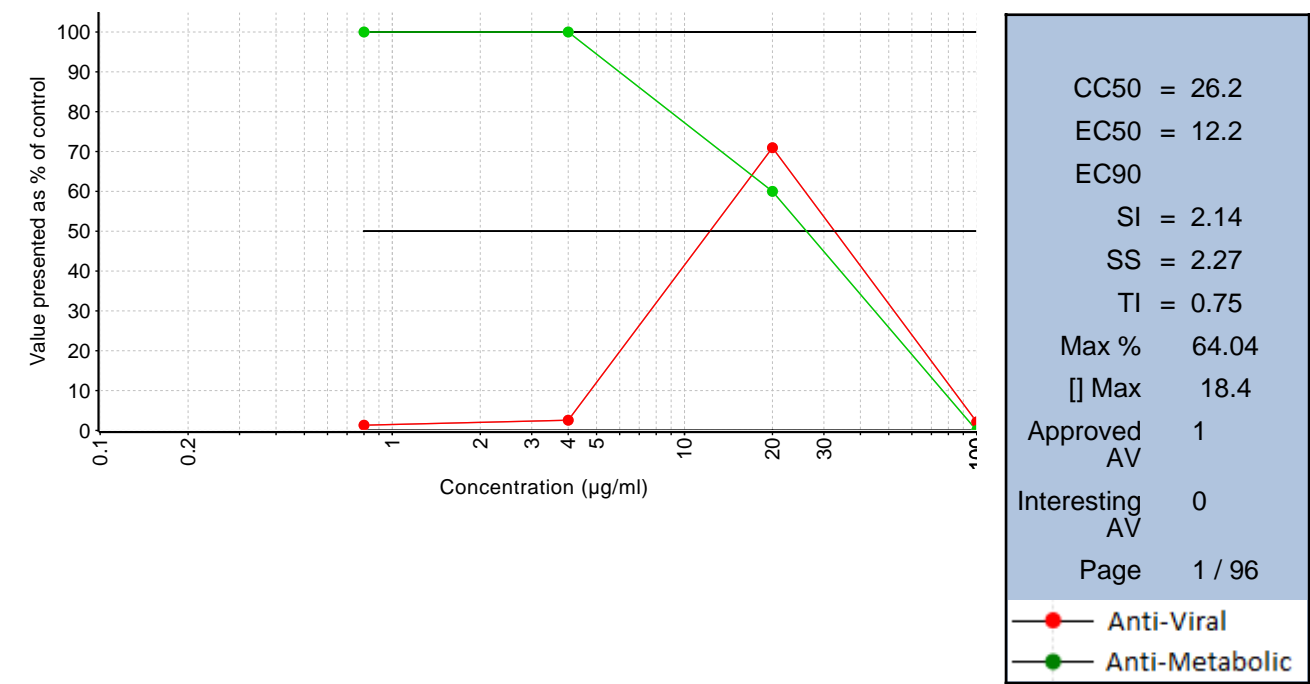

[Export chart data to CSV](#)

| Summary values |        |        |      |
|----------------|--------|--------|------|
| Statistic      | CC50   | EC50   | EC90 |
| Median         | = 29.4 | = 12.2 |      |
| Med.Abs.Dev.   | 3.25   |        |      |
| Mean           | = 29.4 | = 12.2 |      |
| Stdev.         | 4.59   |        |      |

| Compound       | Virus              |         |             | Cell |         | AV Method  |             | AM Method  |             |
|----------------|--------------------|---------|-------------|------|---------|------------|-------------|------------|-------------|
| Primary code   | Species            | Type    | Strain      | Type | Subtype | Method     | Type        | Method     | Type        |
| BAVAR IE1_0002 | Yellow fever virus | No Type | 17D Stamari | Huh  | 7       | Absorbance | MTS - 498nm | Microscopy | Tox scoring |

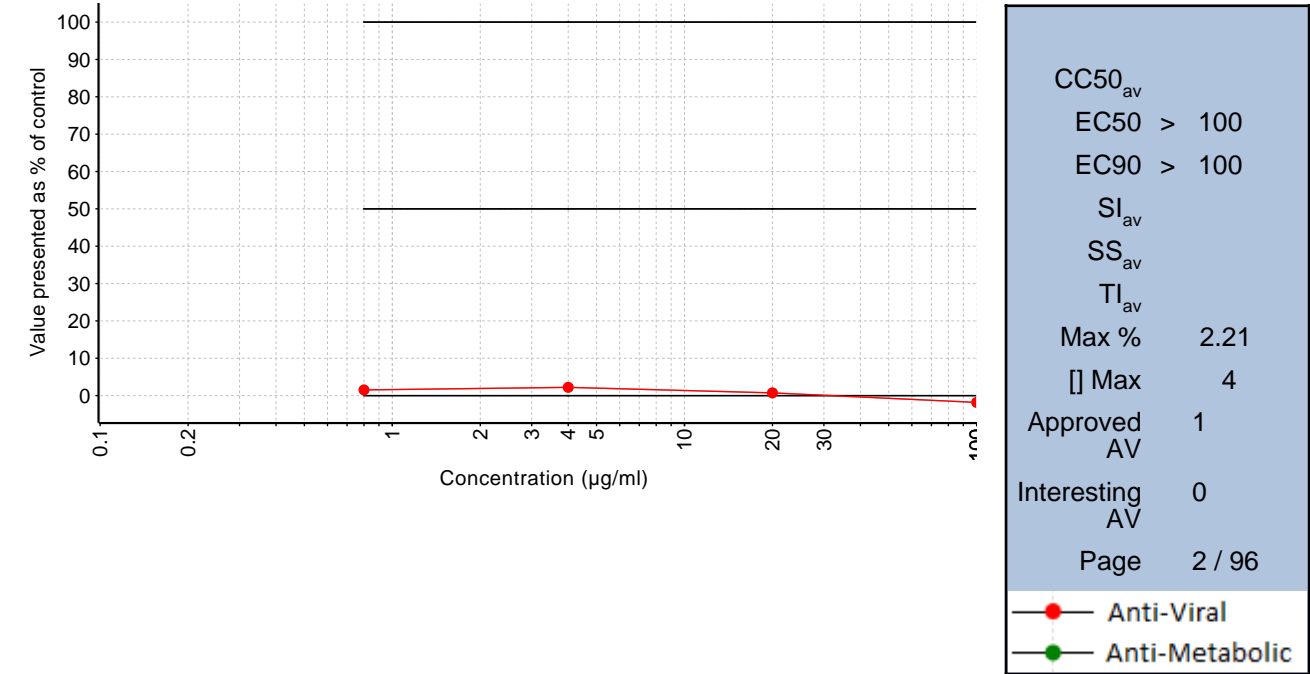

[Export chart data to CSV](#)

| Summary values |      |       |       |
|----------------|------|-------|-------|
| Statistic      | CC50 | EC50  | EC90  |
| Median         |      | > 100 | > 100 |
| Med.Abs.Dev.   |      |       |       |
| Mean           |      | > 100 | > 100 |
| Stdev.         |      |       |       |

| Compound       | Virus              |         |             | Cell |         | AV Method  |             | AM Method  |             |
|----------------|--------------------|---------|-------------|------|---------|------------|-------------|------------|-------------|
| Primary code   | Species            | Type    | Strain      | Type | Subtype | Method     | Type        | Method     | Type        |
| BAVAR IE1_0003 | Yellow fever virus | No Type | 17D Stamari | Huh  | 7       | Absorbance | MTS - 498nm | Microscopy | Tox scoring |

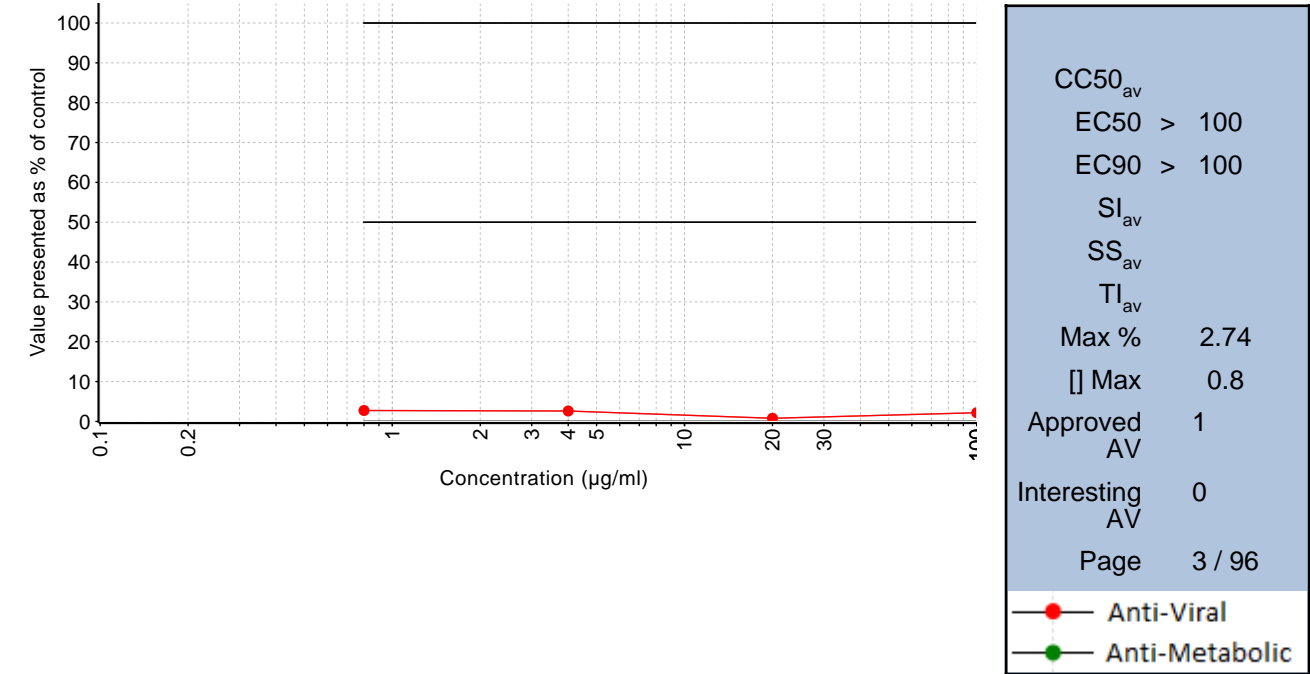

[Export chart data to CSV](#)

| Summary values |      |       |       |
|----------------|------|-------|-------|
| Statistic      | CC50 | EC50  | EC90  |
| Median         |      | > 100 | > 100 |
| Med.Abs.Dev.   |      |       |       |
| Mean           |      | > 100 | > 100 |
| Stdev.         |      |       |       |

| Compound       | Virus              |         |             | Cell |         | AV Method  |             | AM Method  |             |
|----------------|--------------------|---------|-------------|------|---------|------------|-------------|------------|-------------|
| Primary code   | Species            | Type    | Strain      | Type | Subtype | Method     | Type        | Method     | Type        |
| BAVAR IE1_0004 | Yellow fever virus | No Type | 17D Stamari | Huh  | 7       | Absorbance | MTS - 498nm | Microscopy | Tox scoring |

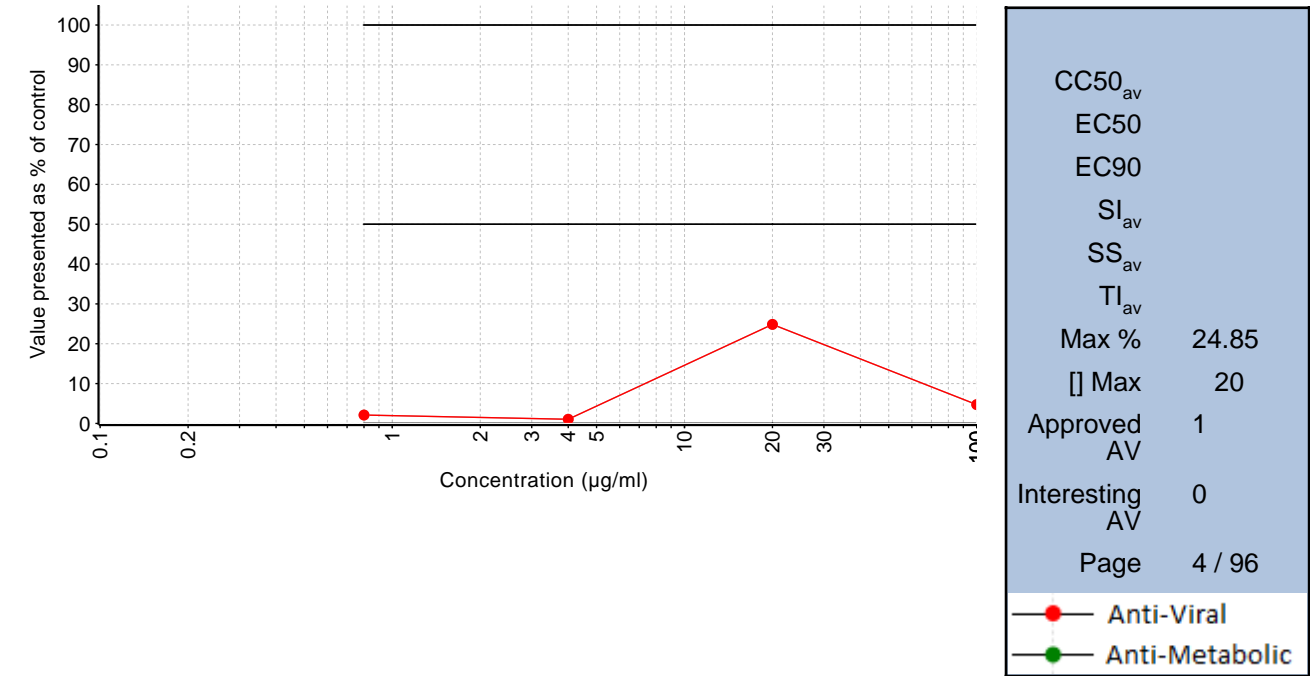

[Export chart data to CSV](#)

| Summary values |      |      |      |
|----------------|------|------|------|
| Statistic      | CC50 | EC50 | EC90 |
| Median         |      |      |      |
| Med.Abs.Dev.   |      |      |      |
| Mean           |      |      |      |
| Stdev.         |      |      |      |

| Compound       | Virus              |         |             | Cell |         | AV Method  |             | AM Method  |             |
|----------------|--------------------|---------|-------------|------|---------|------------|-------------|------------|-------------|
| Primary code   | Species            | Type    | Strain      | Type | Subtype | Method     | Type        | Method     | Type        |
| BAVAR IE1_0005 | Yellow fever virus | No Type | 17D Stamari | Huh  | 7       | Absorbance | MTS - 498nm | Microscopy | Tox scoring |

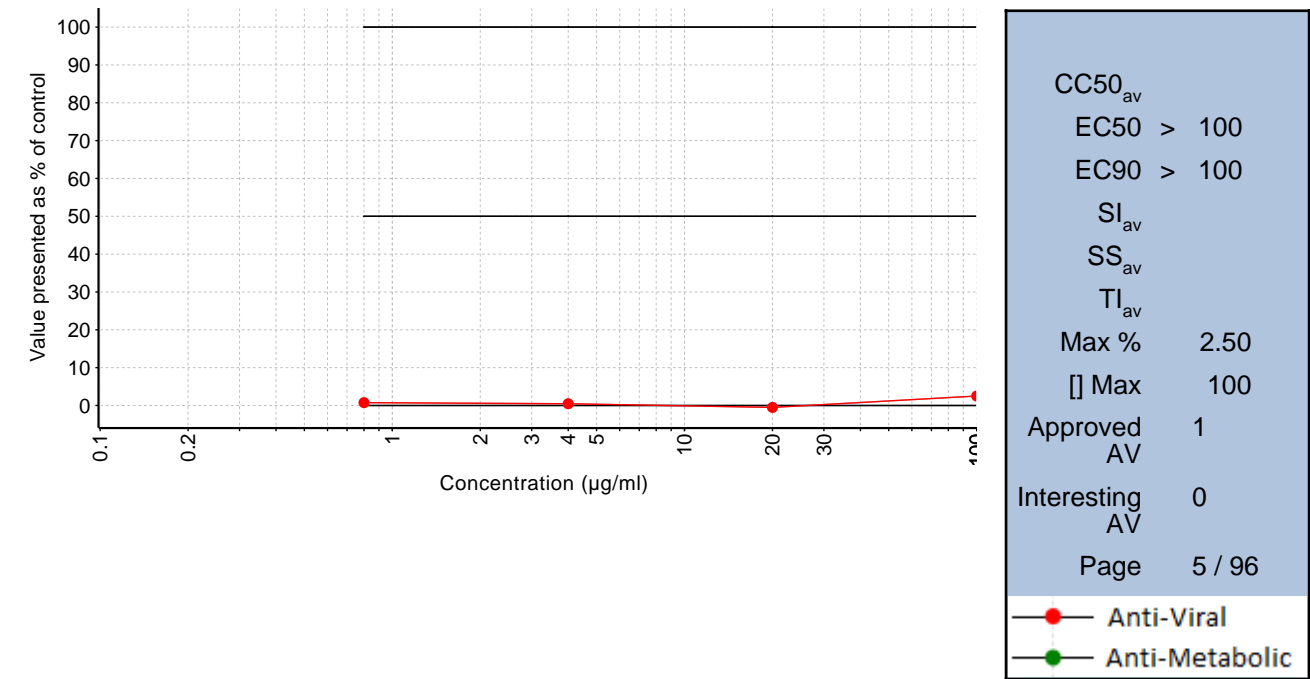

[Export chart data to CSV](#)

| Summary values |      |       |       |
|----------------|------|-------|-------|
| Statistic      | CC50 | EC50  | EC90  |
| Median         |      | > 100 | > 100 |
| Med.Abs.Dev.   |      |       |       |
| Mean           |      | > 100 | > 100 |
| Stdev.         |      |       |       |

| Compound       | Virus              |         |             | Cell |         | AV Method  |             | AM Method  |             |
|----------------|--------------------|---------|-------------|------|---------|------------|-------------|------------|-------------|
| Primary code   | Species            | Type    | Strain      | Type | Subtype | Method     | Type        | Method     | Type        |
| BAVAR IE1_0006 | Yellow fever virus | No Type | 17D Stamari | Huh  | 7       | Absorbance | MTS - 498nm | Microscopy | Tox scoring |

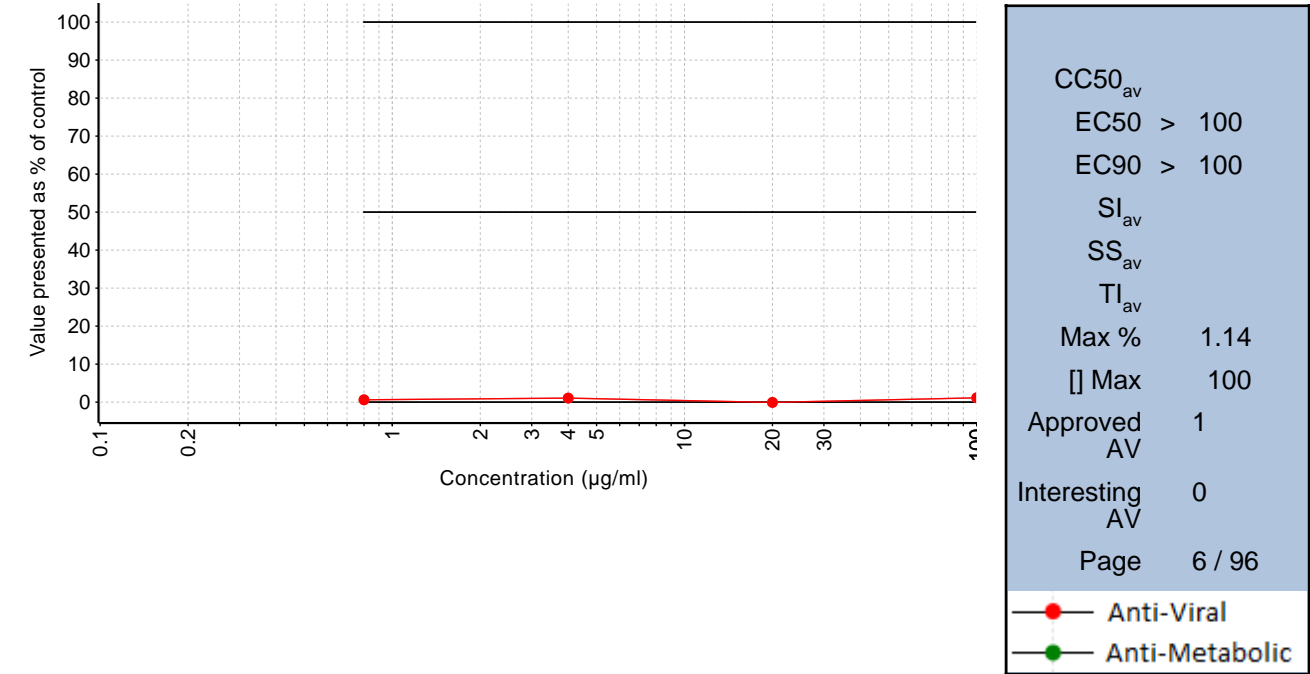

[Export chart data to CSV](#)

| Summary values |      |       |       |
|----------------|------|-------|-------|
| Statistic      | CC50 | EC50  | EC90  |
| Median         |      | > 100 | > 100 |
| Med.Abs.Dev.   |      |       |       |
| Mean           |      | > 100 | > 100 |
| Stdev.         |      |       |       |

| Compound      | Virus              |         |             | Cell |         | AV Method  |             | AM Method  |             |
|---------------|--------------------|---------|-------------|------|---------|------------|-------------|------------|-------------|
| Primary code  | Species            | Type    | Strain      | Type | Subtype | Method     | Type        | Method     | Type        |
| BAVAR IE1_007 | Yellow fever virus | No Type | 17D Stamari | Huh  | 7       | Absorbance | MTS - 498nm | Microscopy | Tox scoring |

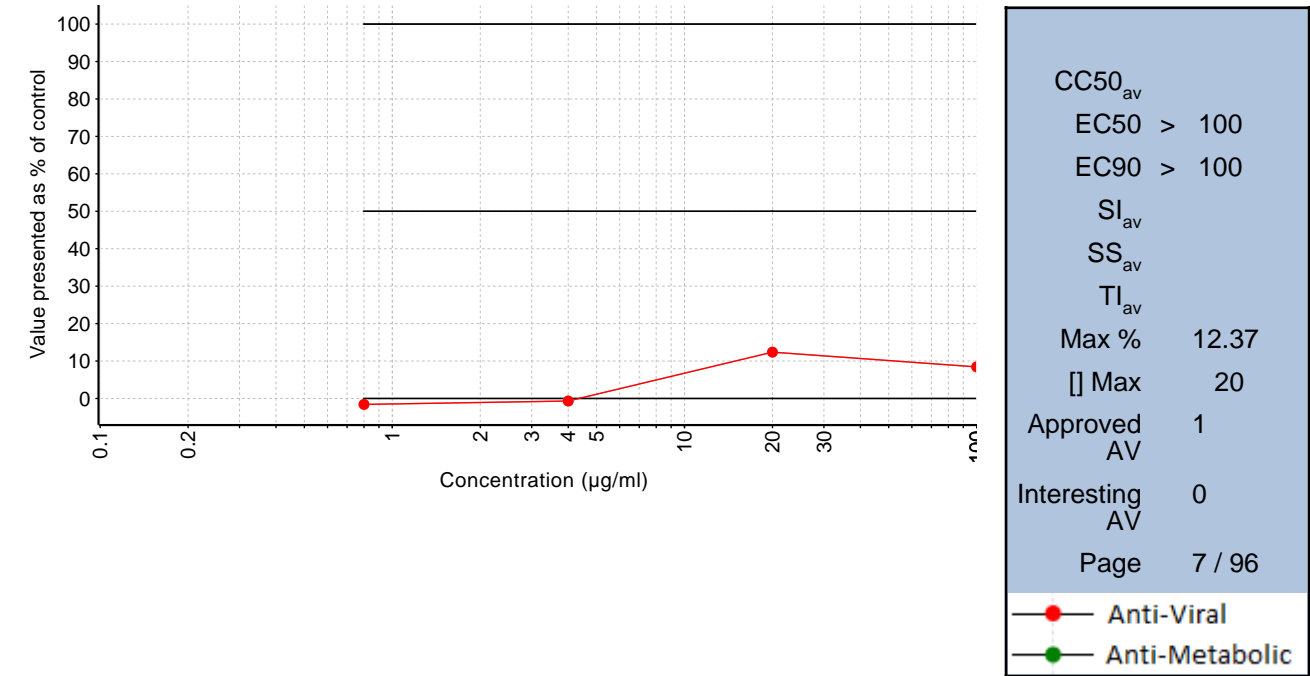

[Export chart data to CSV](#)

| Summary values |      |       |       |
|----------------|------|-------|-------|
| Statistic      | CC50 | EC50  | EC90  |
| Median         |      | > 100 | > 100 |
| Med.Abs.Dev.   |      |       |       |
| Mean           |      | > 100 | > 100 |
| Stdev.         |      |       |       |



| Compound       | Virus              |         |             | Cell |         | AV Method  |             | AM Method  |             |
|----------------|--------------------|---------|-------------|------|---------|------------|-------------|------------|-------------|
| Primary code   | Species            | Type    | Strain      | Type | Subtype | Method     | Type        | Method     | Type        |
| BAVAR IE1_0008 | Yellow fever virus | No Type | 17D Stamari | Huh  | 7       | Absorbance | MTS - 498nm | Microscopy | Tox scoring |

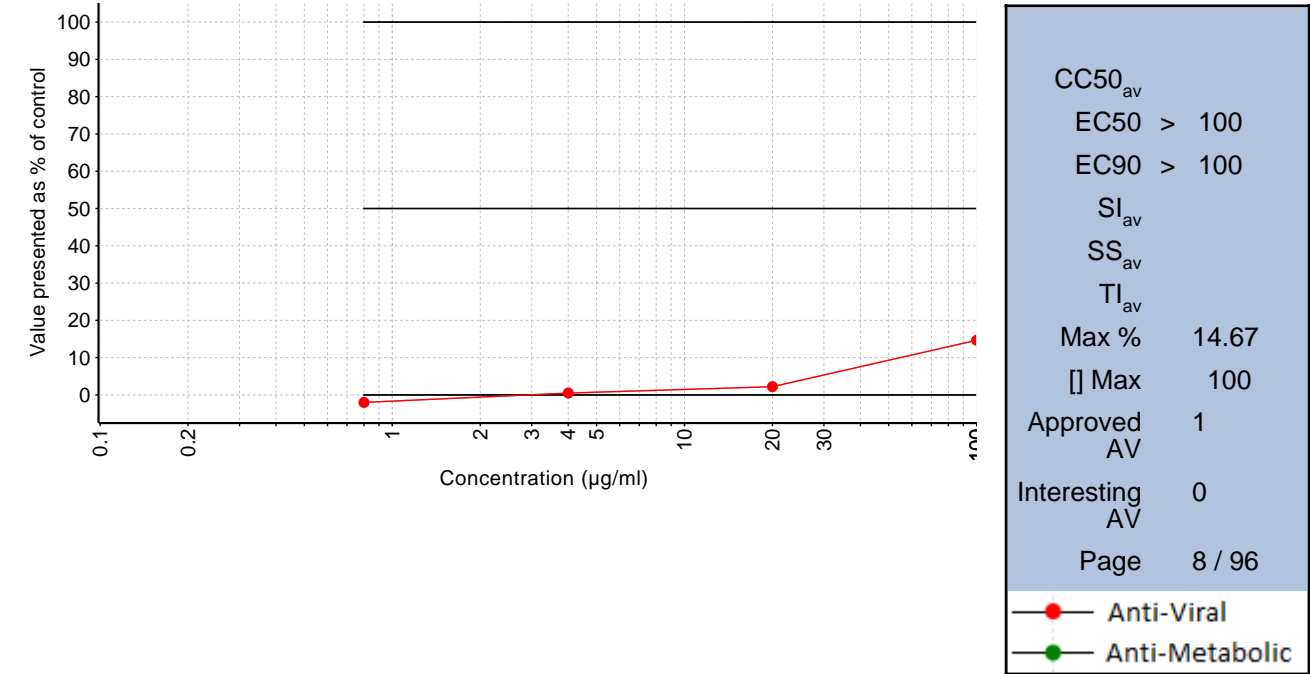

[Export chart data to CSV](#)

| Summary values |      |       |       |
|----------------|------|-------|-------|
| Statistic      | CC50 | EC50  | EC90  |
| Median         |      | > 100 | > 100 |
| Med.Abs.Dev.   |      |       |       |
| Mean           |      | > 100 | > 100 |
| Stdev.         |      |       |       |

| Compound       | Virus              |         |             | Cell |         | AV Method  |             | AM Method  |             |
|----------------|--------------------|---------|-------------|------|---------|------------|-------------|------------|-------------|
| Primary code   | Species            | Type    | Strain      | Type | Subtype | Method     | Type        | Method     | Type        |
| BAVAR IE1_0009 | Yellow fever virus | No Type | 17D Stamari | Huh  | 7       | Absorbance | MTS - 498nm | Microscopy | Tox scoring |

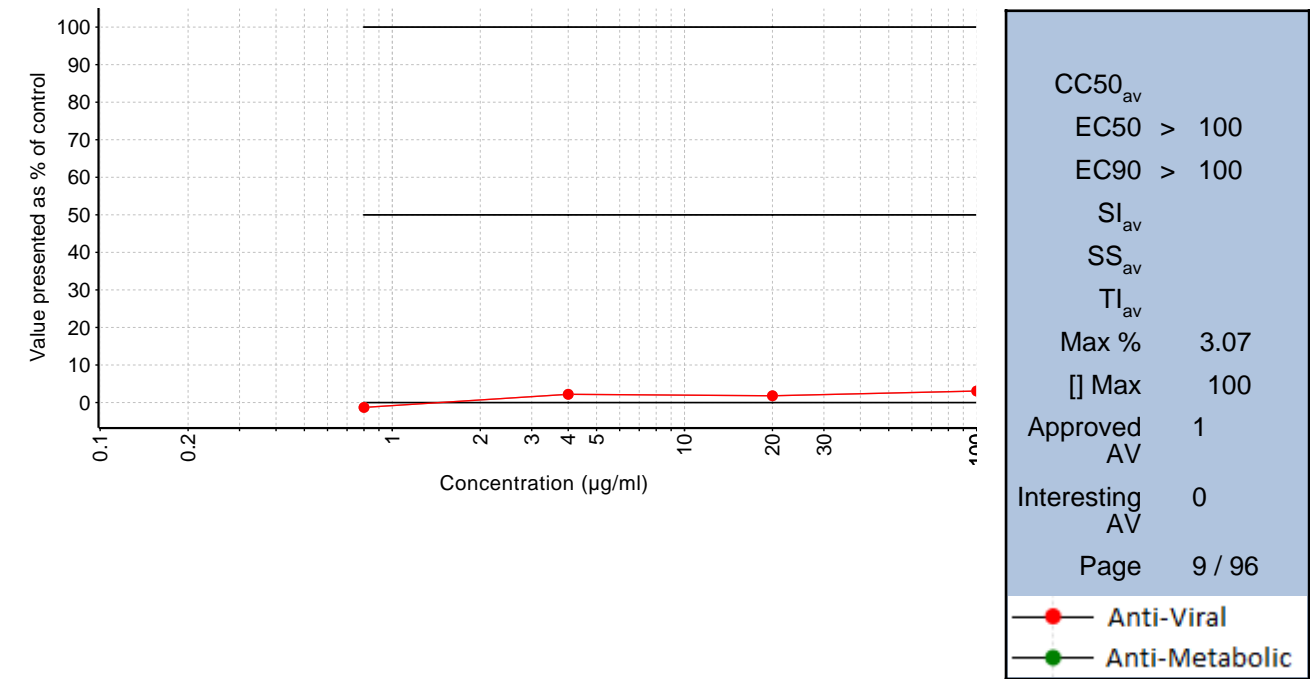

[Export chart data to CSV](#)

| Summary values |      |       |       |
|----------------|------|-------|-------|
| Statistic      | CC50 | EC50  | EC90  |
| Median         |      | > 100 | > 100 |
| Med.Abs.Dev.   |      |       |       |
| Mean           |      | > 100 | > 100 |
| Stdev.         |      |       |       |

| Compound       | Virus              |         |             | Cell |         | AV Method  |             | AM Method  |             |
|----------------|--------------------|---------|-------------|------|---------|------------|-------------|------------|-------------|
| Primary code   | Species            | Type    | Strain      | Type | Subtype | Method     | Type        | Method     | Type        |
| BAVAR IE1_0010 | Yellow fever virus | No Type | 17D Stamari | Huh  | 7       | Absorbance | MTS - 498nm | Microscopy | Tox scoring |

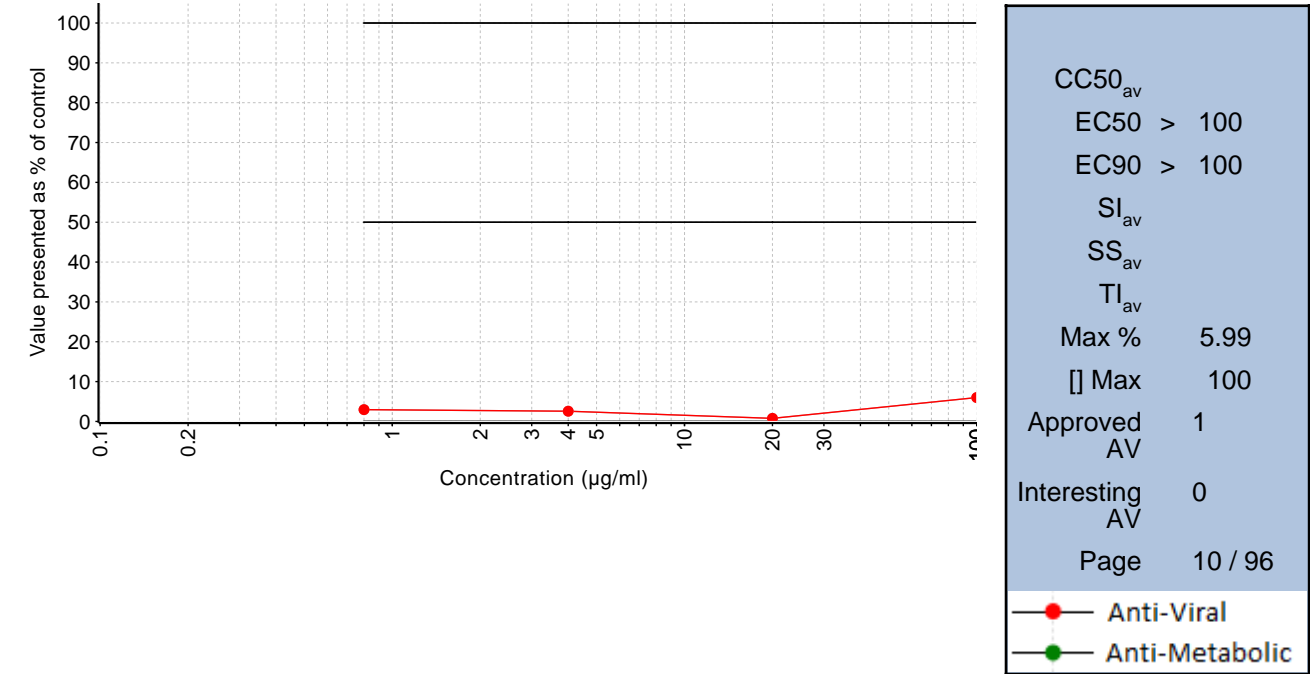

[Export chart data to CSV](#)

| Summary values |      |       |       |
|----------------|------|-------|-------|
| Statistic      | CC50 | EC50  | EC90  |
| Median         |      | > 100 | > 100 |
| Med.Abs.Dev.   |      |       |       |
| Mean           |      | > 100 | > 100 |
| Stdev.         |      |       |       |

| Compound       | Virus              |         |             | Cell |         | AV Method  |             | AM Method  |             |
|----------------|--------------------|---------|-------------|------|---------|------------|-------------|------------|-------------|
| Primary code   | Species            | Type    | Strain      | Type | Subtype | Method     | Type        | Method     | Type        |
| BAVAR IE1_0011 | Yellow fever virus | No Type | 17D Stamari | Huh  | 7       | Absorbance | MTS - 498nm | Microscopy | Tox scoring |

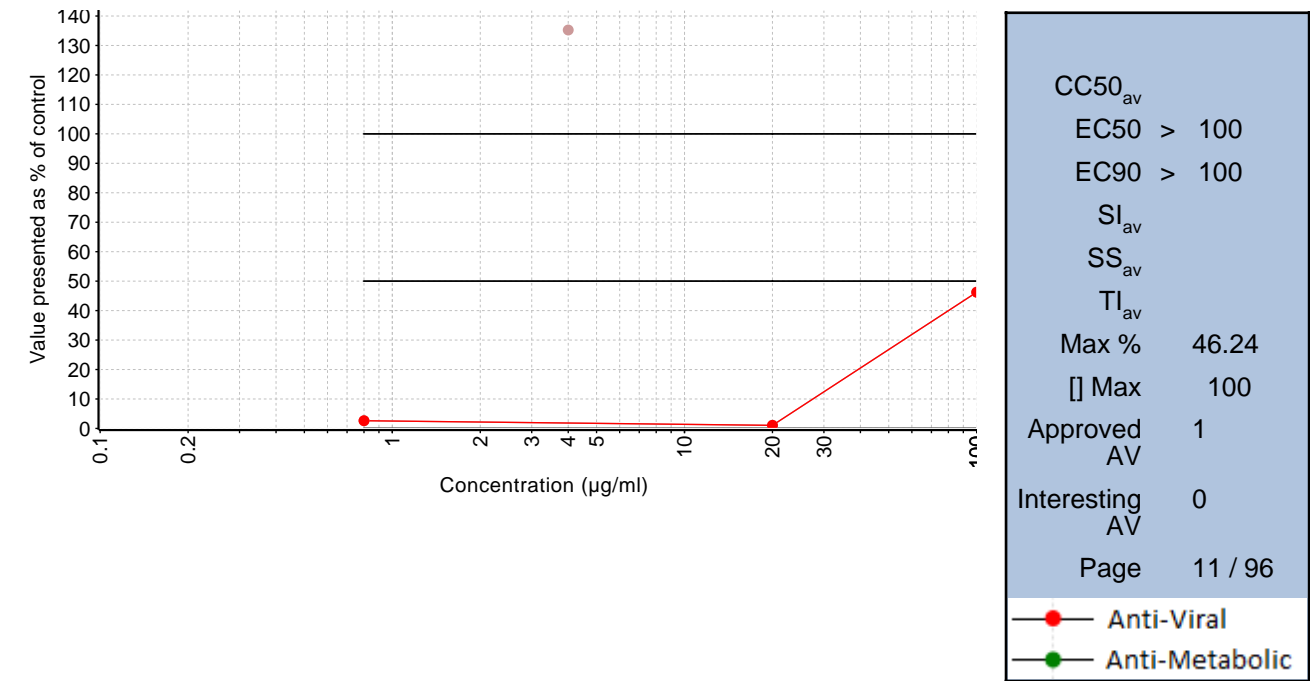

[Export chart data to CSV](#)

| Summary values |      |       |       |
|----------------|------|-------|-------|
| Statistic      | CC50 | EC50  | EC90  |
| Median         |      | > 100 | > 100 |
| Med.Abs.Dev.   |      |       |       |
| Mean           |      | > 100 | > 100 |
| Stdev.         |      |       |       |

| Compound       | Virus              |         |             | Cell |         | AV Method  |             | AM Method  |             |
|----------------|--------------------|---------|-------------|------|---------|------------|-------------|------------|-------------|
| Primary code   | Species            | Type    | Strain      | Type | Subtype | Method     | Type        | Method     | Type        |
| BAVAR IE1_0012 | Yellow fever virus | No Type | 17D Stamari | Huh  | 7       | Absorbance | MTS - 498nm | Microscopy | Tox scoring |

Needs more data.

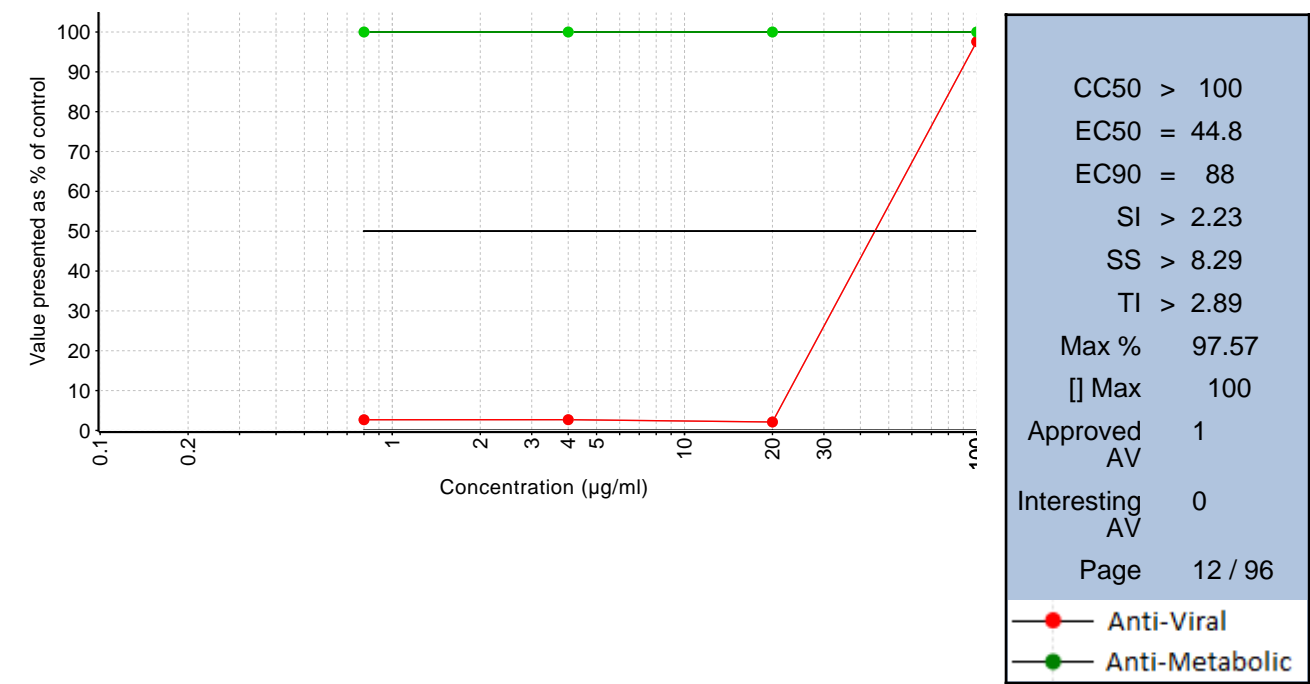

[Export chart data to CSV](#)

| Summary values |       |        |      |
|----------------|-------|--------|------|
| Statistic      | CC50  | EC50   | EC90 |
| Median         | > 100 | = 44.8 | = 88 |
| Med.Abs.Dev.   |       |        |      |
| Mean           | > 100 | = 44.8 | = 88 |
| Stdev.         |       |        |      |

| Compound       | Virus              |         |             | Cell |         | AV Method  |             | AM Method  |             |
|----------------|--------------------|---------|-------------|------|---------|------------|-------------|------------|-------------|
| Primary code   | Species            | Type    | Strain      | Type | Subtype | Method     | Type        | Method     | Type        |
| BAVAR IE1_0013 | Yellow fever virus | No Type | 17D Stamari | Huh  | 7       | Absorbance | MTS - 498nm | Microscopy | Tox scoring |

Needs more data.

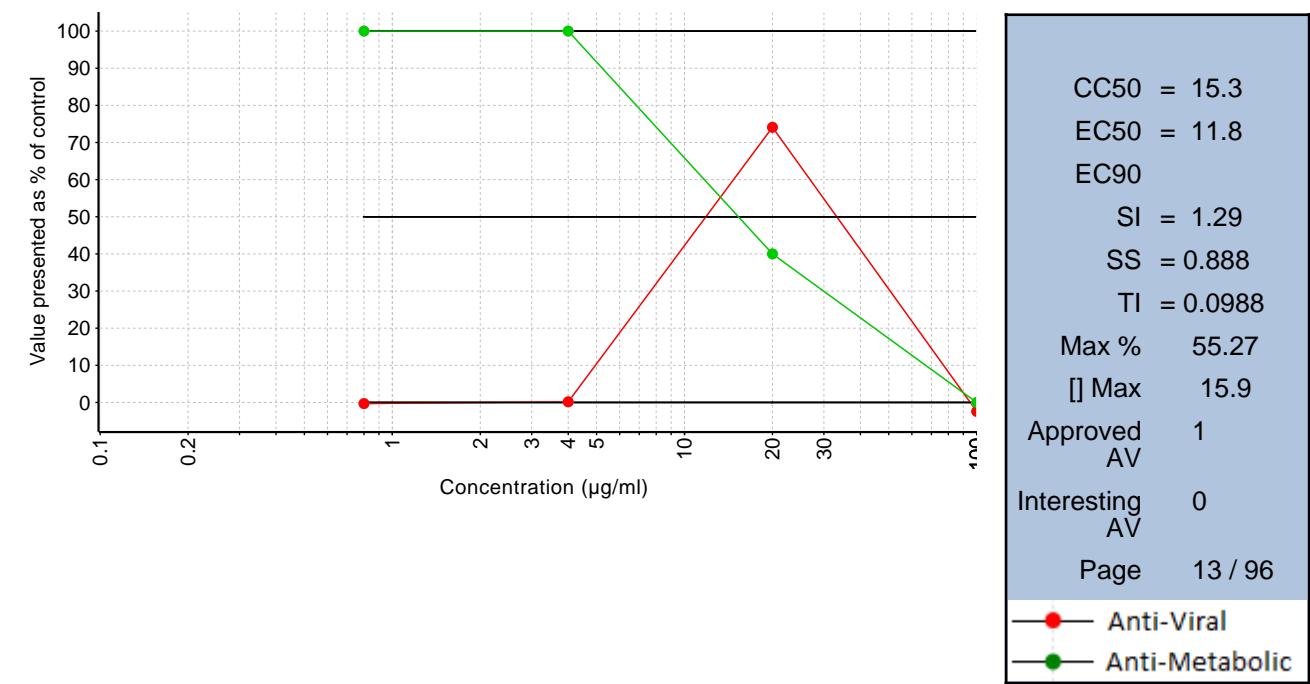

[Export chart data to CSV](#)

| Summary values |        |        |      |
|----------------|--------|--------|------|
| Statistic      | CC50   | EC50   | EC90 |
| Median         | = 24.2 | = 11.8 |      |
| Med.Abs.Dev.   | 8.95   |        |      |
| Mean           | = 24.2 | = 11.8 |      |
| Stdev.         | 12.7   |        |      |

| Compound       | Virus              |         |             | Cell |         | AV Method  |             | AM Method  |             |
|----------------|--------------------|---------|-------------|------|---------|------------|-------------|------------|-------------|
| Primary code   | Species            | Type    | Strain      | Type | Subtype | Method     | Type        | Method     | Type        |
| BAVAR IE1_0014 | Yellow fever virus | No Type | 17D Stamari | Huh  | 7       | Absorbance | MTS - 498nm | Microscopy | Tox scoring |

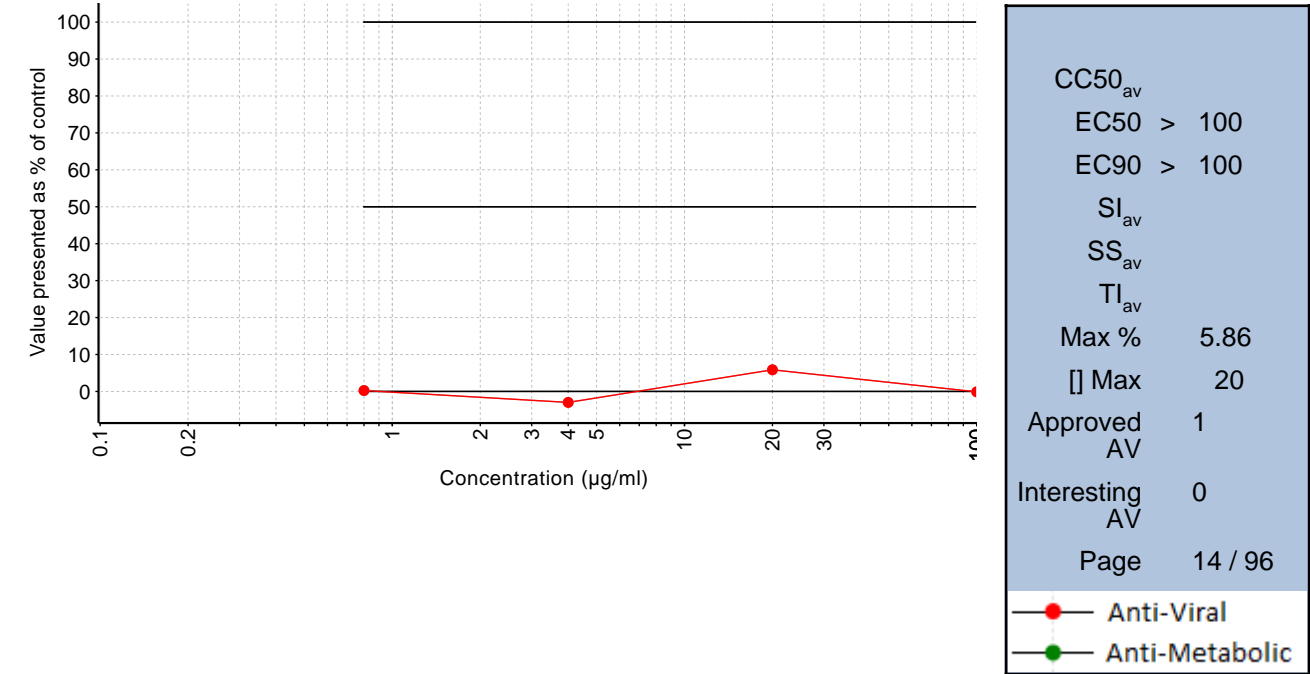

[Export chart data to CSV](#)

| Summary values |      |       |       |
|----------------|------|-------|-------|
| Statistic      | CC50 | EC50  | EC90  |
| Median         |      | > 100 | > 100 |
| Med.Abs.Dev.   |      |       |       |
| Mean           |      | > 100 | > 100 |
| Stdev.         |      |       |       |

| Compound       | Virus              |         |             | Cell |         | AV Method  |             | AM Method  |             |
|----------------|--------------------|---------|-------------|------|---------|------------|-------------|------------|-------------|
| Primary code   | Species            | Type    | Strain      | Type | Subtype | Method     | Type        | Method     | Type        |
| BAVAR IE1_0015 | Yellow fever virus | No Type | 17D Stamari | Huh  | 7       | Absorbance | MTS - 498nm | Microscopy | Tox scoring |

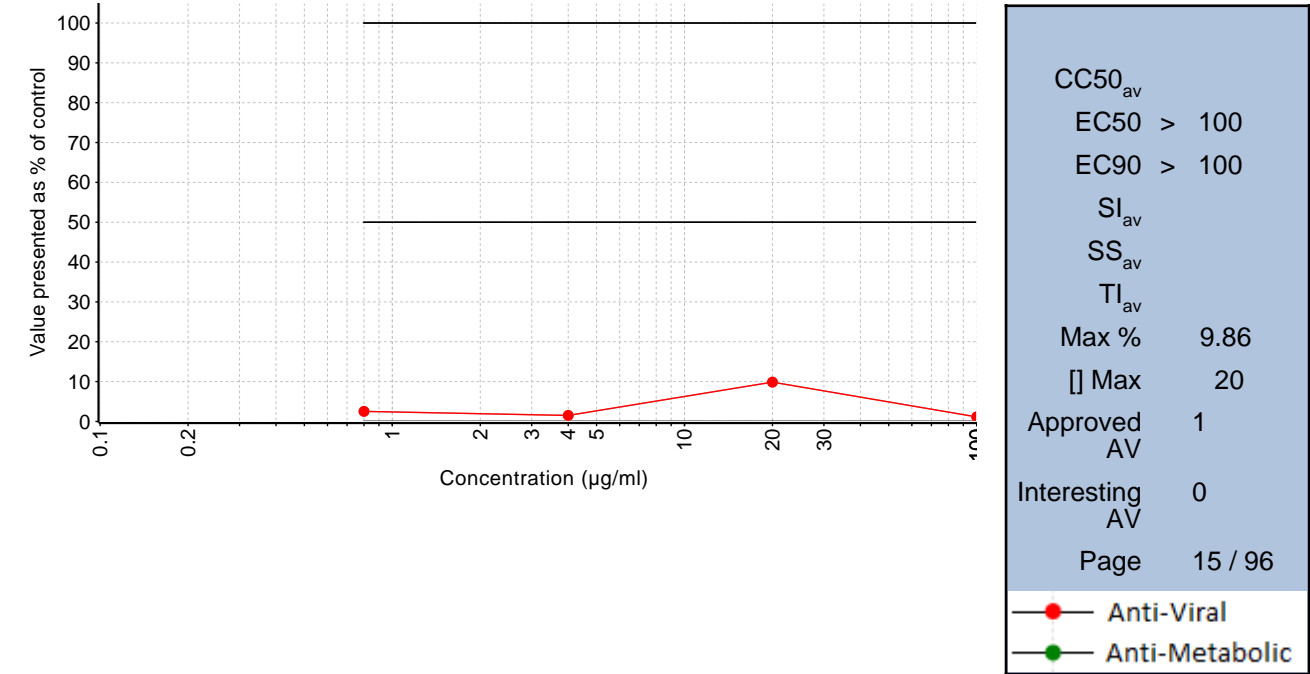

[Export chart data to CSV](#)

| Summary values |      |       |       |
|----------------|------|-------|-------|
| Statistic      | CC50 | EC50  | EC90  |
| Median         |      | > 100 | > 100 |
| Med.Abs.Dev.   |      |       |       |
| Mean           |      | > 100 | > 100 |
| Stdev.         |      |       |       |



| Compound       | Virus              |         |             | Cell |         | AV Method  |             | AM Method  |             |
|----------------|--------------------|---------|-------------|------|---------|------------|-------------|------------|-------------|
| Primary code   | Species            | Type    | Strain      | Type | Subtype | Method     | Type        | Method     | Type        |
| BAVAR IE1_0016 | Yellow fever virus | No Type | 17D Stamari | Huh  | 7       | Absorbance | MTS - 498nm | Microscopy | Tox scoring |

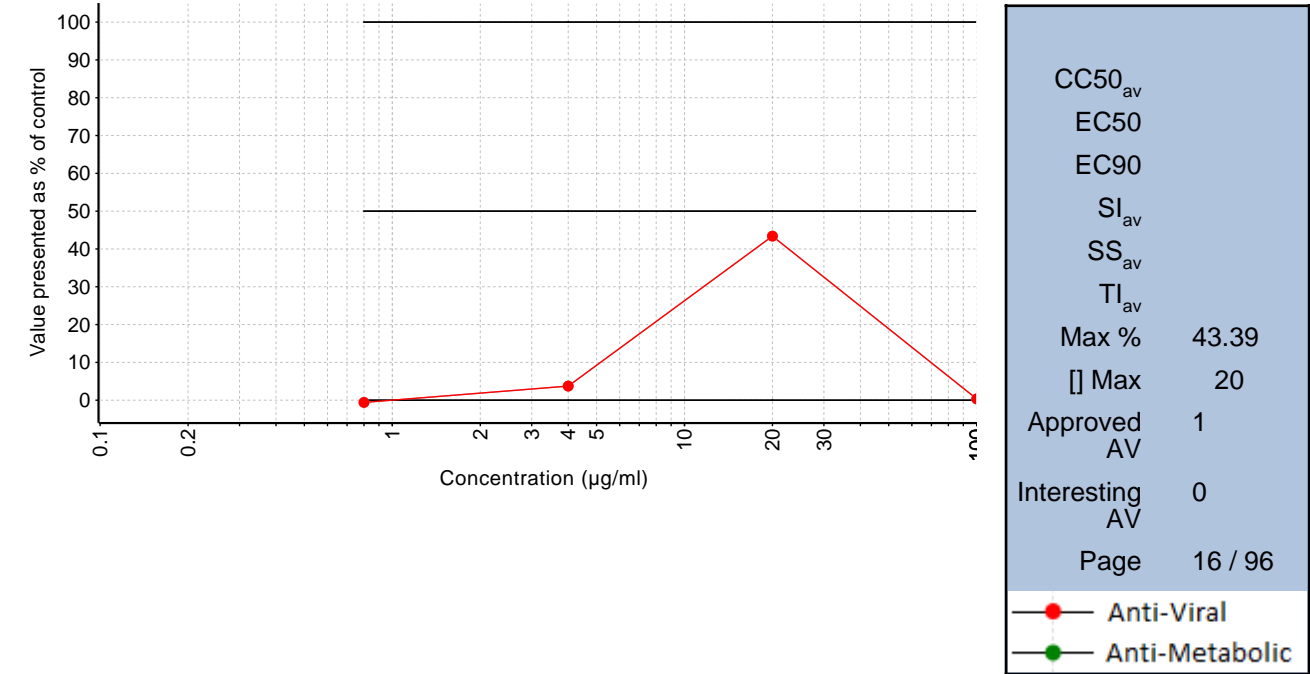

[Export chart data to CSV](#)

| Summary values |      |      |      |
|----------------|------|------|------|
| Statistic      | CC50 | EC50 | EC90 |
| Median         |      |      |      |
| Med.Abs.Dev.   |      |      |      |
| Mean           |      |      |      |
| Stdev.         |      |      |      |

| Compound       | Virus              |         |             | Cell |         | AV Method  |             | AM Method  |             |
|----------------|--------------------|---------|-------------|------|---------|------------|-------------|------------|-------------|
| Primary code   | Species            | Type    | Strain      | Type | Subtype | Method     | Type        | Method     | Type        |
| BAVAR IE1_0017 | Yellow fever virus | No Type | 17D Stamari | Huh  | 7       | Absorbance | MTS - 498nm | Microscopy | Tox scoring |

Needs more data.

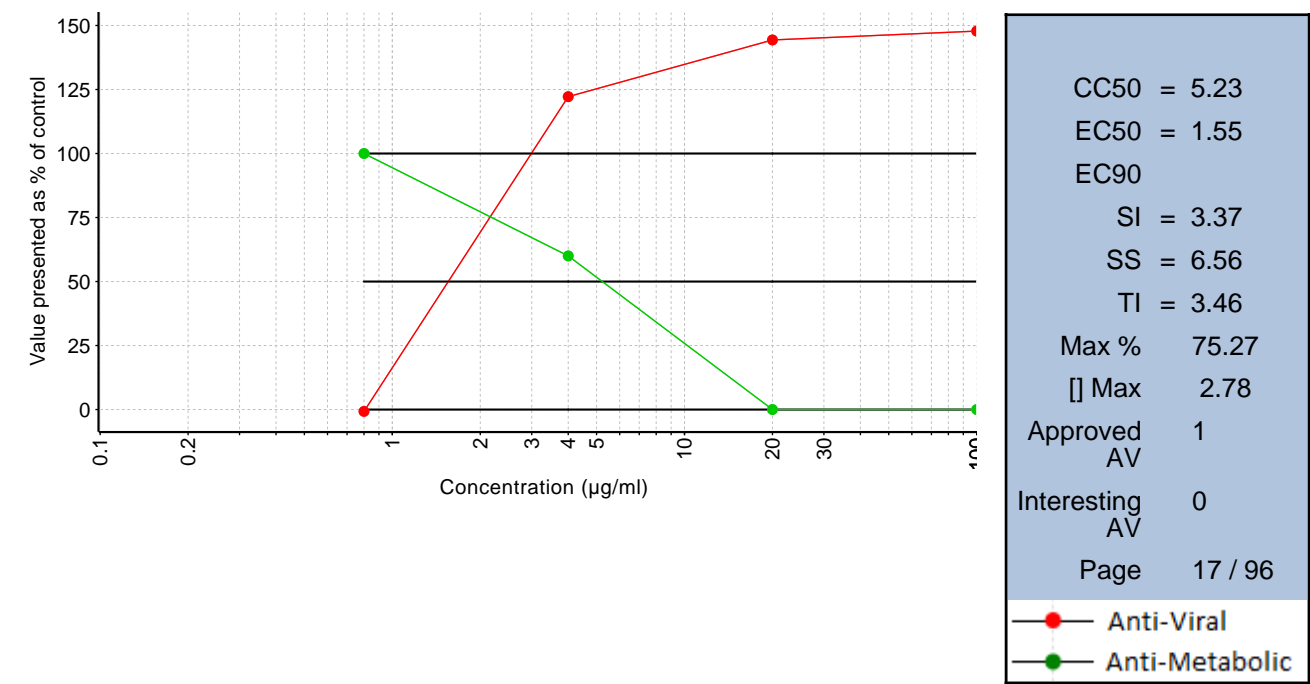

[Export chart data to CSV](#)

| Summary values |        |        |        |
|----------------|--------|--------|--------|
| Statistic      | CC50   | EC50   | EC90   |
| Median         | = 5.23 | = 1.55 | = 2.62 |
| Med.Abs.Dev.   |        |        |        |
| Mean           | = 5.23 | = 1.55 | = 2.62 |
| Stdev.         |        |        |        |

| Compound       | Virus              |         |             | Cell |         | AV Method  |             | AM Method  |             |
|----------------|--------------------|---------|-------------|------|---------|------------|-------------|------------|-------------|
| Primary code   | Species            | Type    | Strain      | Type | Subtype | Method     | Type        | Method     | Type        |
| BAVAR IE1_0018 | Yellow fever virus | No Type | 17D Stamari | Huh  | 7       | Absorbance | MTS - 498nm | Microscopy | Tox scoring |

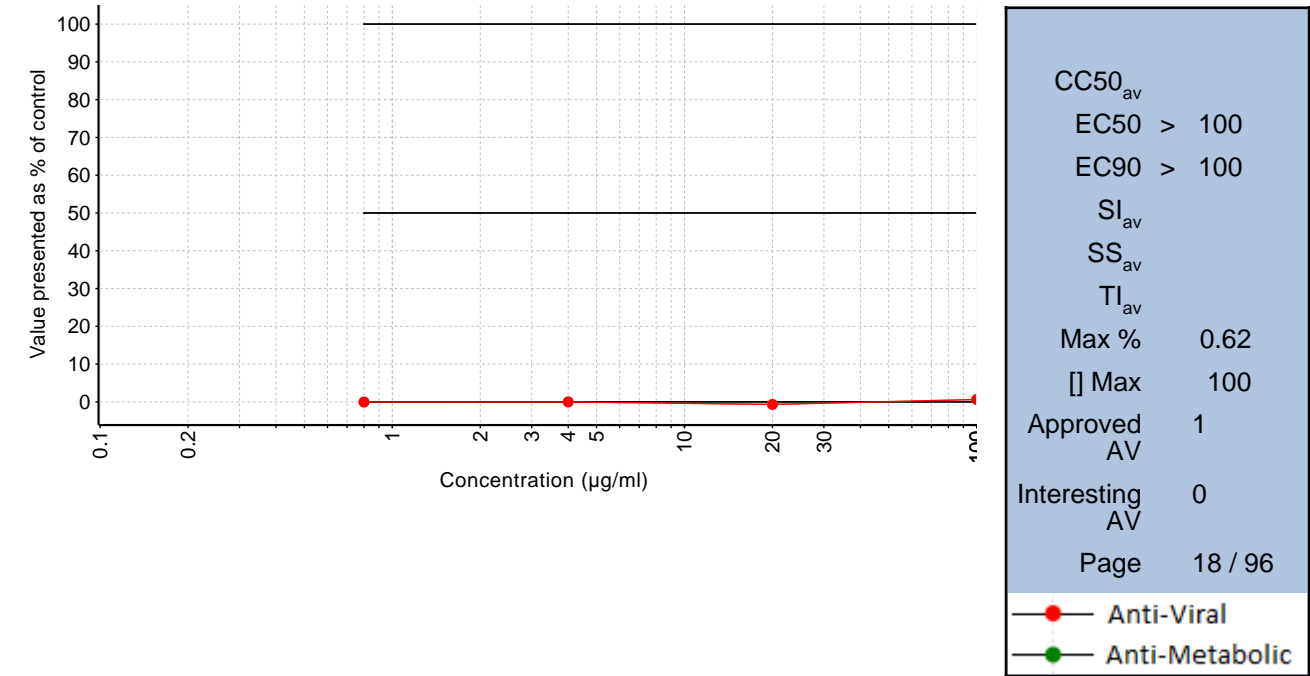

[Export chart data to CSV](#)

| Summary values |      |       |       |
|----------------|------|-------|-------|
| Statistic      | CC50 | EC50  | EC90  |
| Median         |      | > 100 | > 100 |
| Med.Abs.Dev.   |      |       |       |
| Mean           |      | > 100 | > 100 |
| Stdev.         |      |       |       |

| Compound       | Virus              |         |             | Cell |         | AV Method  |             | AM Method  |             |
|----------------|--------------------|---------|-------------|------|---------|------------|-------------|------------|-------------|
| Primary code   | Species            | Type    | Strain      | Type | Subtype | Method     | Type        | Method     | Type        |
| BAVAR IE1_0019 | Yellow fever virus | No Type | 17D Stamari | Huh  | 7       | Absorbance | MTS - 498nm | Microscopy | Tox scoring |

Needs more data.

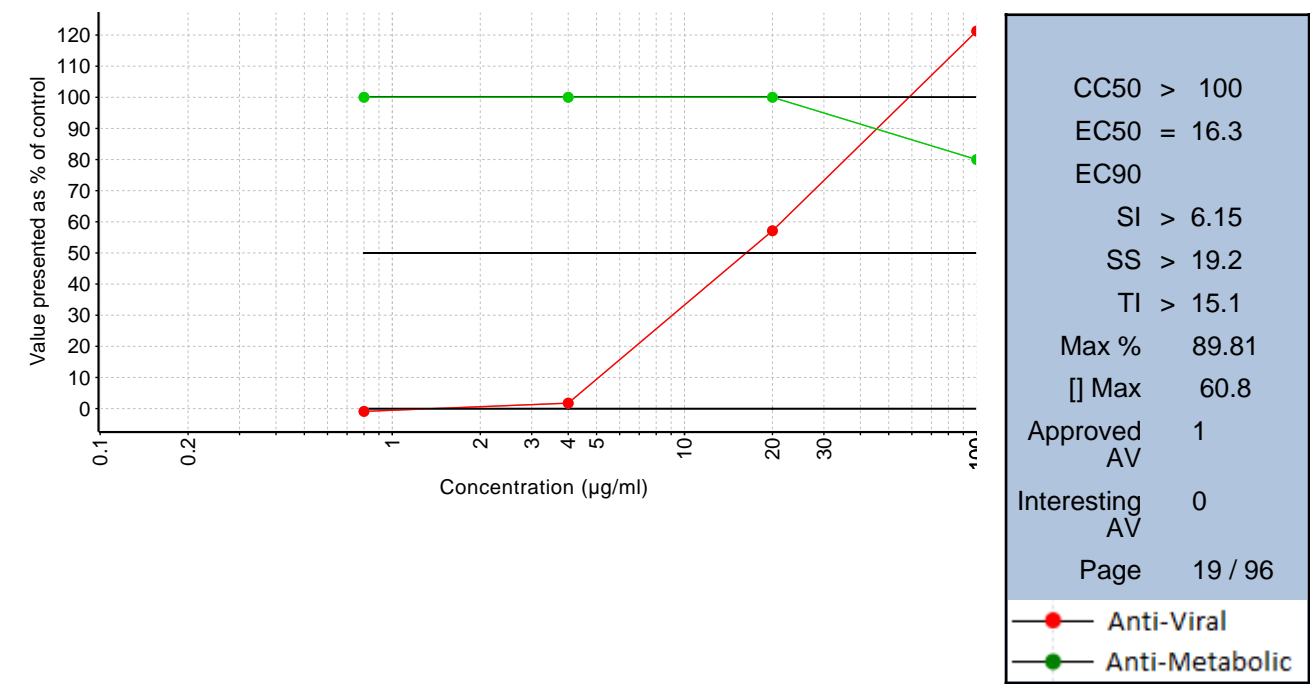

[Export chart data to CSV](#)

| Summary values |       |        |        |
|----------------|-------|--------|--------|
| Statistic      | CC50  | EC50   | EC90   |
| Median         | > 100 | = 16.3 | = 45.6 |
| Med.Abs.Dev.   |       |        |        |
| Mean           | > 100 | = 16.3 | = 45.6 |
| Stdev.         |       |        |        |

| Compound       | Virus              |         |             | Cell |         | AV Method  |             | AM Method  |             |
|----------------|--------------------|---------|-------------|------|---------|------------|-------------|------------|-------------|
| Primary code   | Species            | Type    | Strain      | Type | Subtype | Method     | Type        | Method     | Type        |
| BAVAR IE1_0020 | Yellow fever virus | No Type | 17D Stamari | Huh  | 7       | Absorbance | MTS - 498nm | Microscopy | Tox scoring |

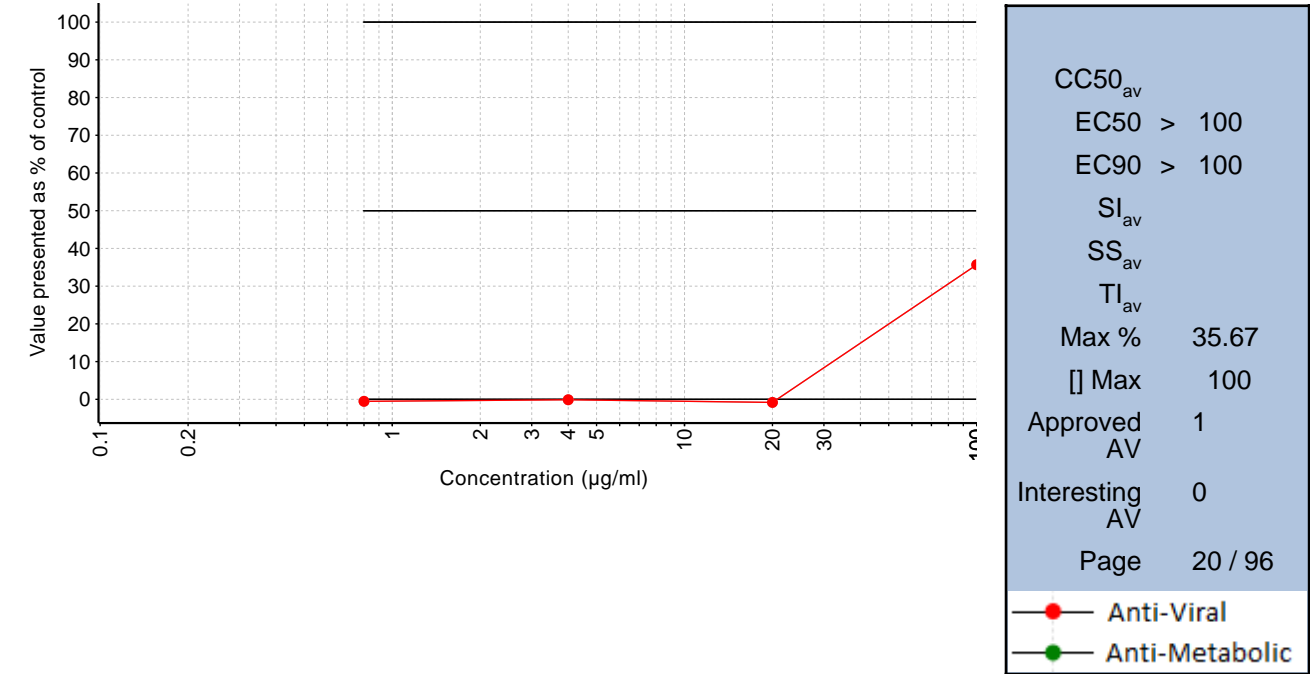

[Export chart data to CSV](#)

| Summary values |      |       |       |
|----------------|------|-------|-------|
| Statistic      | CC50 | EC50  | EC90  |
| Median         |      | > 100 | > 100 |
| Med.Abs.Dev.   |      |       |       |
| Mean           |      | > 100 | > 100 |
| Stdev.         |      |       |       |

| Compound       | Virus              |         |             | Cell |         | AV Method  |             | AM Method  |             |
|----------------|--------------------|---------|-------------|------|---------|------------|-------------|------------|-------------|
| Primary code   | Species            | Type    | Strain      | Type | Subtype | Method     | Type        | Method     | Type        |
| BAVAR IE1_0021 | Yellow fever virus | No Type | 17D Stamari | Huh  | 7       | Absorbance | MTS - 498nm | Microscopy | Tox scoring |

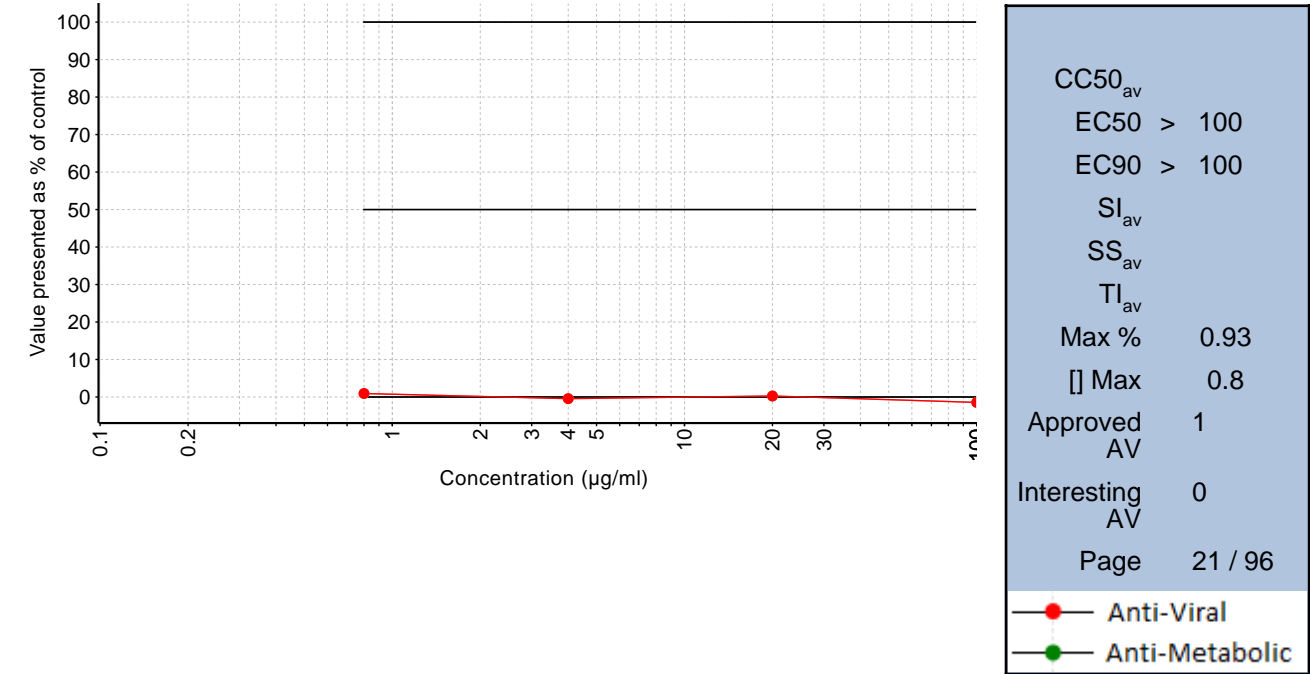

[Export chart data to CSV](#)

| Summary values |      |       |       |
|----------------|------|-------|-------|
| Statistic      | CC50 | EC50  | EC90  |
| Median         |      | > 100 | > 100 |
| Med.Abs.Dev.   |      |       |       |
| Mean           |      | > 100 | > 100 |
| Stdev.         |      |       |       |

| Compound       | Virus              |         |             | Cell |         | AV Method  |             | AM Method  |             |
|----------------|--------------------|---------|-------------|------|---------|------------|-------------|------------|-------------|
| Primary code   | Species            | Type    | Strain      | Type | Subtype | Method     | Type        | Method     | Type        |
| BAVAR IE1_0022 | Yellow fever virus | No Type | 17D Stamari | Huh  | 7       | Absorbance | MTS - 498nm | Microscopy | Tox scoring |

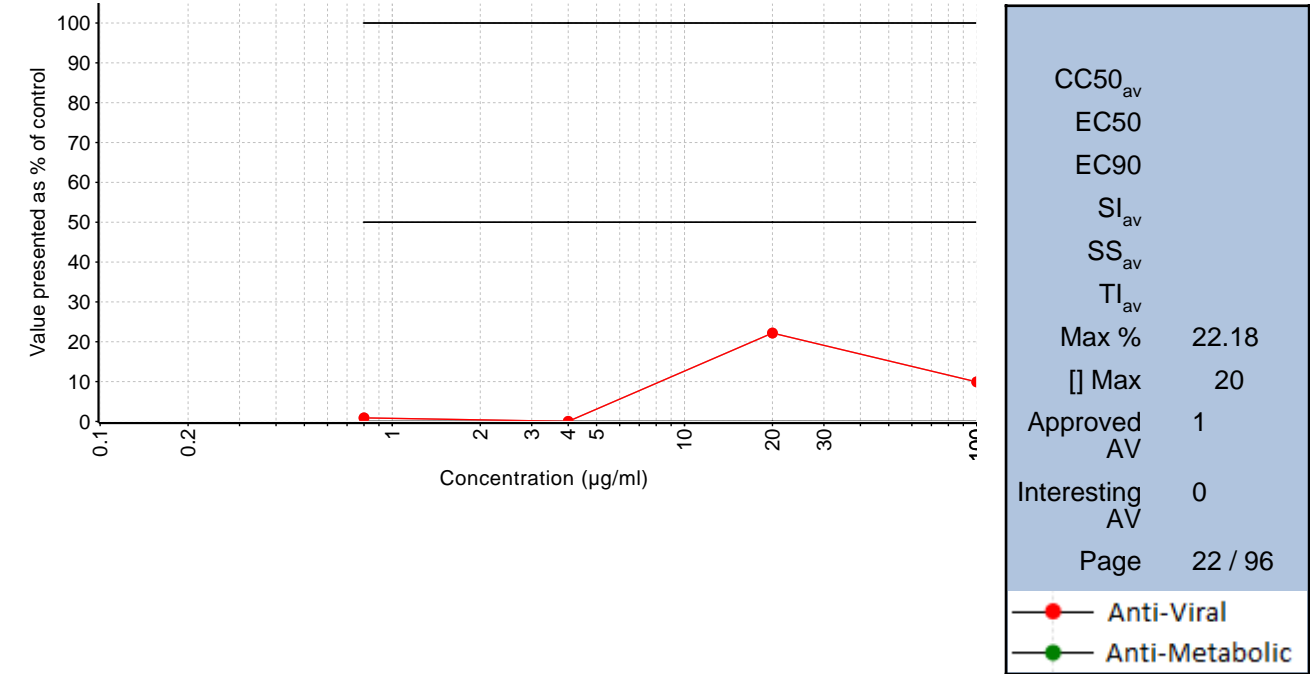

[Export chart data to CSV](#)

| Summary values |      |      |      |
|----------------|------|------|------|
| Statistic      | CC50 | EC50 | EC90 |
| Median         |      |      |      |
| Med.Abs.Dev.   |      |      |      |
| Mean           |      |      |      |
| Stdev.         |      |      |      |

| Compound       | Virus              |         |             | Cell |         | AV Method  |             | AM Method  |             |
|----------------|--------------------|---------|-------------|------|---------|------------|-------------|------------|-------------|
| Primary code   | Species            | Type    | Strain      | Type | Subtype | Method     | Type        | Method     | Type        |
| BAVAR IE1_0023 | Yellow fever virus | No Type | 17D Stamari | Huh  | 7       | Absorbance | MTS - 498nm | Microscopy | Tox scoring |

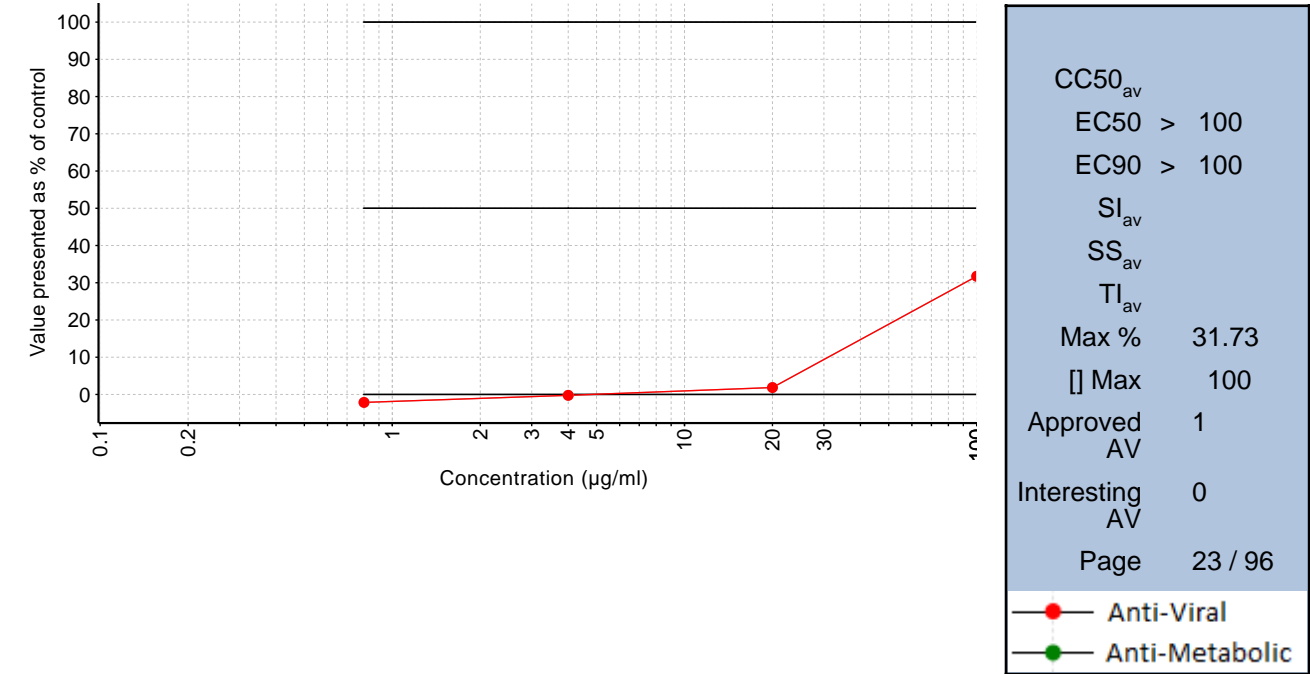

[Export chart data to CSV](#)

| Summary values |      |       |       |
|----------------|------|-------|-------|
| Statistic      | CC50 | EC50  | EC90  |
| Median         |      | > 100 | > 100 |
| Med.Abs.Dev.   |      |       |       |
| Mean           |      | > 100 | > 100 |
| Stdev.         |      |       |       |



| Compound       | Virus              |         |             | Cell |         | AV Method  |             | AM Method  |             |
|----------------|--------------------|---------|-------------|------|---------|------------|-------------|------------|-------------|
| Primary code   | Species            | Type    | Strain      | Type | Subtype | Method     | Type        | Method     | Type        |
| BAVAR IE1_0024 | Yellow fever virus | No Type | 17D Stamari | Huh  | 7       | Absorbance | MTS - 498nm | Microscopy | Tox scoring |

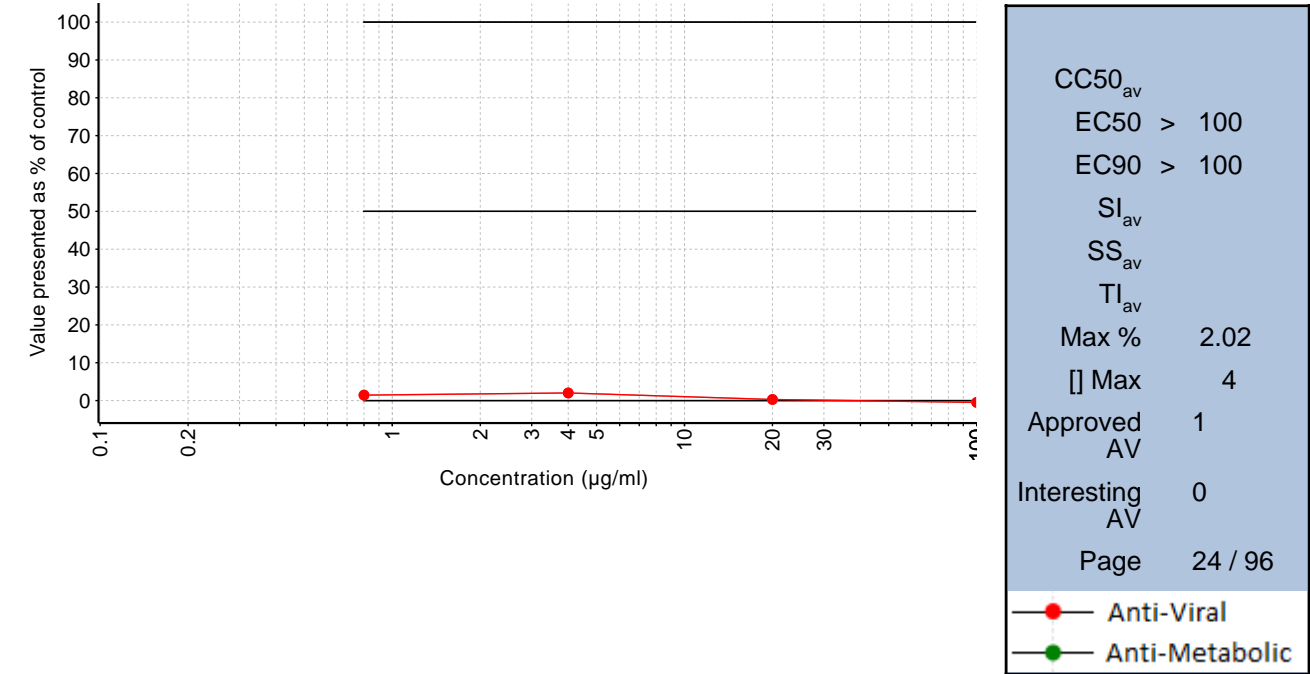

[Export chart data to CSV](#)

| Summary values |      |       |       |
|----------------|------|-------|-------|
| Statistic      | CC50 | EC50  | EC90  |
| Median         |      | > 100 | > 100 |
| Med.Abs.Dev.   |      |       |       |
| Mean           |      | > 100 | > 100 |
| Stdev.         |      |       |       |

| Compound       | Virus              |         |             | Cell |         | AV Method  |             | AM Method  |             |
|----------------|--------------------|---------|-------------|------|---------|------------|-------------|------------|-------------|
| Primary code   | Species            | Type    | Strain      | Type | Subtype | Method     | Type        | Method     | Type        |
| BAVAR IE1_0025 | Yellow fever virus | No Type | 17D Stamari | Huh  | 7       | Absorbance | MTS - 498nm | Microscopy | Tox scoring |

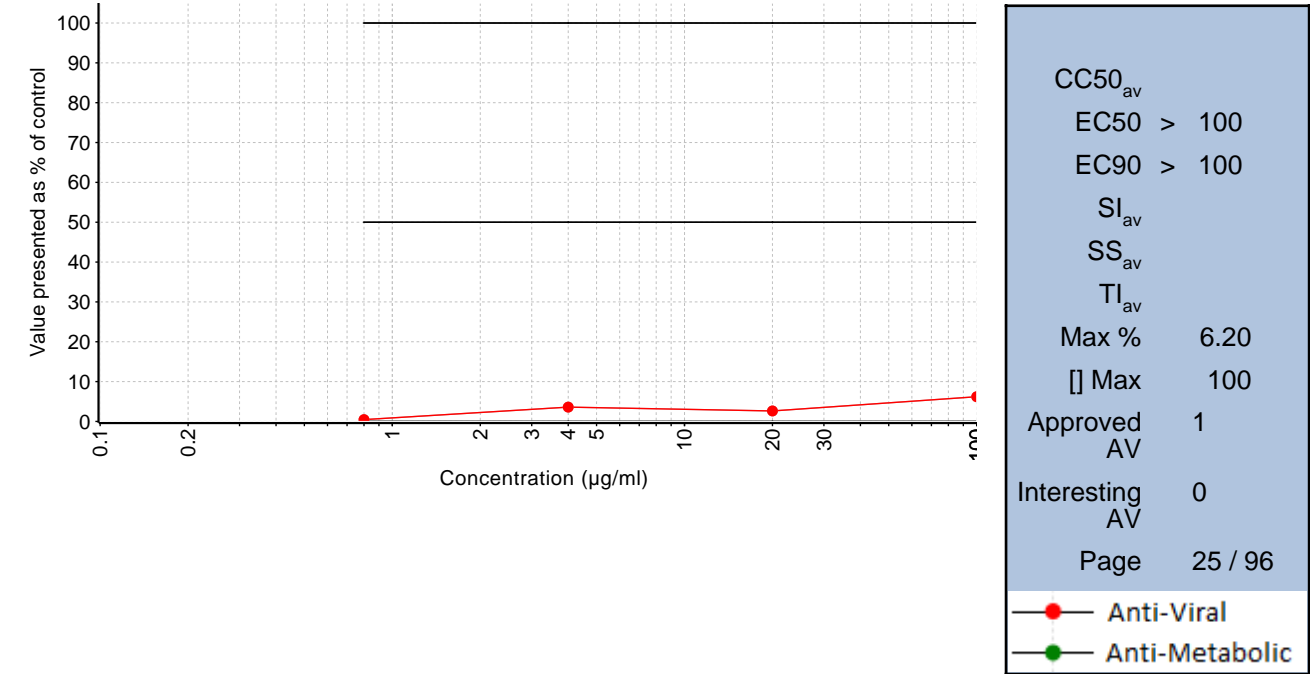

[Export chart data to CSV](#)

| Summary values |      |       |       |
|----------------|------|-------|-------|
| Statistic      | CC50 | EC50  | EC90  |
| Median         |      | > 100 | > 100 |
| Med.Abs.Dev.   |      |       |       |
| Mean           |      | > 100 | > 100 |
| Stdev.         |      |       |       |

| Compound       | Virus              |         |             | Cell |         | AV Method  |             | AM Method  |             |
|----------------|--------------------|---------|-------------|------|---------|------------|-------------|------------|-------------|
| Primary code   | Species            | Type    | Strain      | Type | Subtype | Method     | Type        | Method     | Type        |
| BAVAR IE1_0026 | Yellow fever virus | No Type | 17D Stamari | Huh  | 7       | Absorbance | MTS - 498nm | Microscopy | Tox scoring |

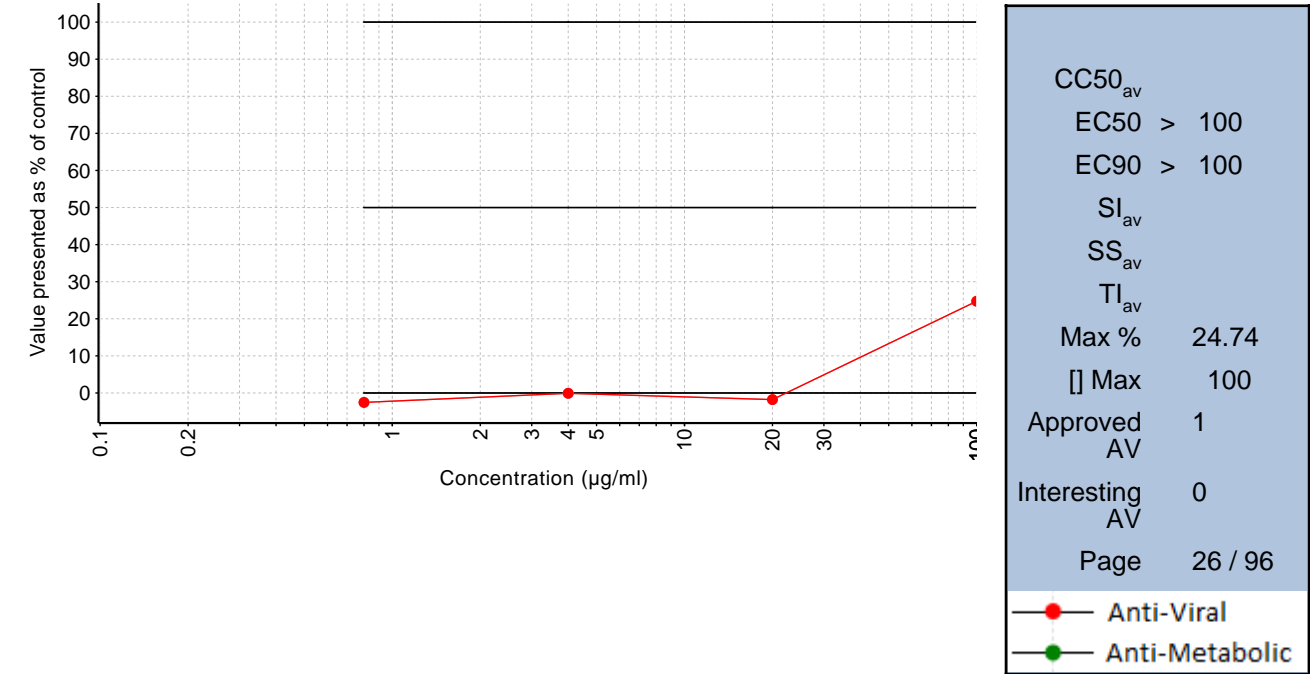

[Export chart data to CSV](#)

| Summary values |      |       |       |
|----------------|------|-------|-------|
| Statistic      | CC50 | EC50  | EC90  |
| Median         |      | > 100 | > 100 |
| Med.Abs.Dev.   |      |       |       |
| Mean           |      | > 100 | > 100 |
| Stdev.         |      |       |       |

| Compound       | Virus              |         |             | Cell |         | AV Method  |             | AM Method  |             |
|----------------|--------------------|---------|-------------|------|---------|------------|-------------|------------|-------------|
| Primary code   | Species            | Type    | Strain      | Type | Subtype | Method     | Type        | Method     | Type        |
| BAVAR IE1_0027 | Yellow fever virus | No Type | 17D Stamari | Huh  | 7       | Absorbance | MTS - 498nm | Microscopy | Tox scoring |

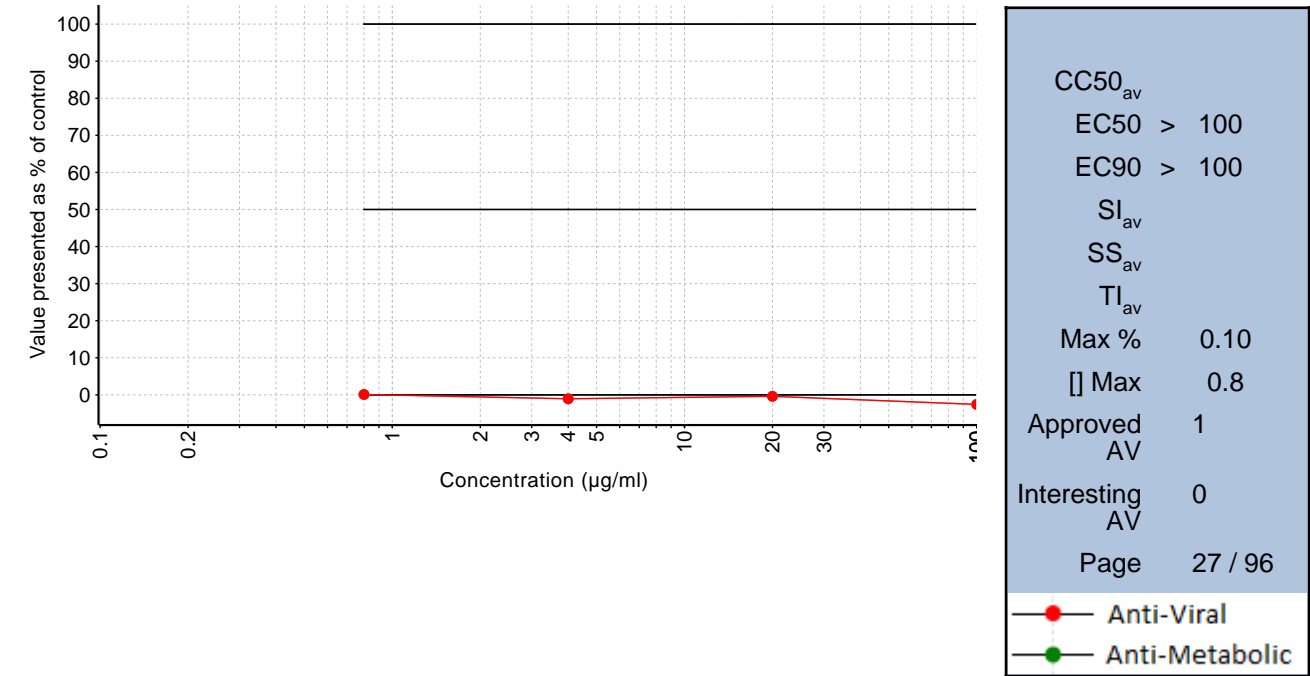

[Export chart data to CSV](#)

| Summary values |      |       |       |
|----------------|------|-------|-------|
| Statistic      | CC50 | EC50  | EC90  |
| Median         |      | > 100 | > 100 |
| Med.Abs.Dev.   |      |       |       |
| Mean           |      | > 100 | > 100 |
| Stdev.         |      |       |       |

| Compound       | Virus              |         |               | Cell |         | AV Method  |             | AM Method  |             |
|----------------|--------------------|---------|---------------|------|---------|------------|-------------|------------|-------------|
| Primary code   | Species            | Type    | Strain        | Type | Subtype | Method     | Type        | Method     | Type        |
| BAVAR IE1_0028 | Yellow fever virus | No Type | 17D Stamari l | Huh  | 7       | Absorbance | MTS - 498nm | Microscopy | Tox scoring |

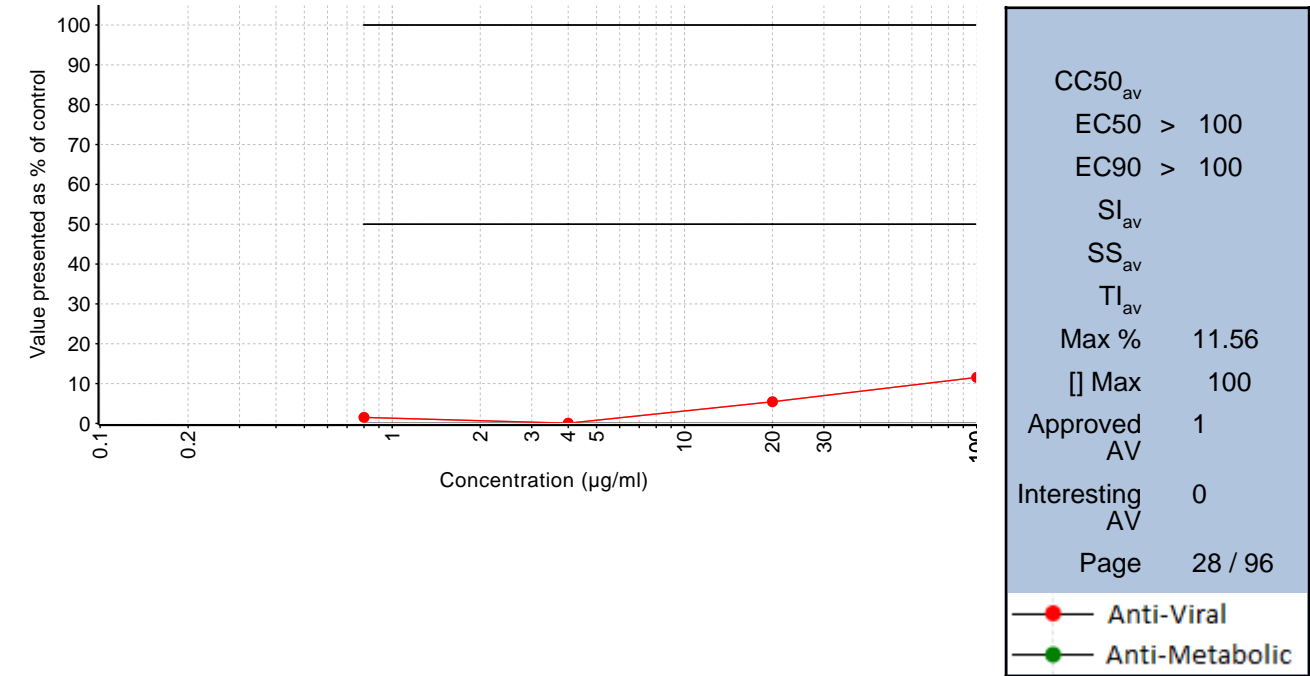

[Export chart data to CSV](#)

| Summary values |      |       |       |
|----------------|------|-------|-------|
| Statistic      | CC50 | EC50  | EC90  |
| Median         |      | > 100 | > 100 |
| Med.Abs.Dev.   |      |       |       |
| Mean           |      | > 100 | > 100 |
| Stdev.         |      |       |       |

| Compound       | Virus              |         |             | Cell |         | AV Method  |             | AM Method  |             |
|----------------|--------------------|---------|-------------|------|---------|------------|-------------|------------|-------------|
| Primary code   | Species            | Type    | Strain      | Type | Subtype | Method     | Type        | Method     | Type        |
| BAVAR IE1_0029 | Yellow fever virus | No Type | 17D Stamari | Huh  | 7       | Absorbance | MTS - 498nm | Microscopy | Tox scoring |

Needs more data.

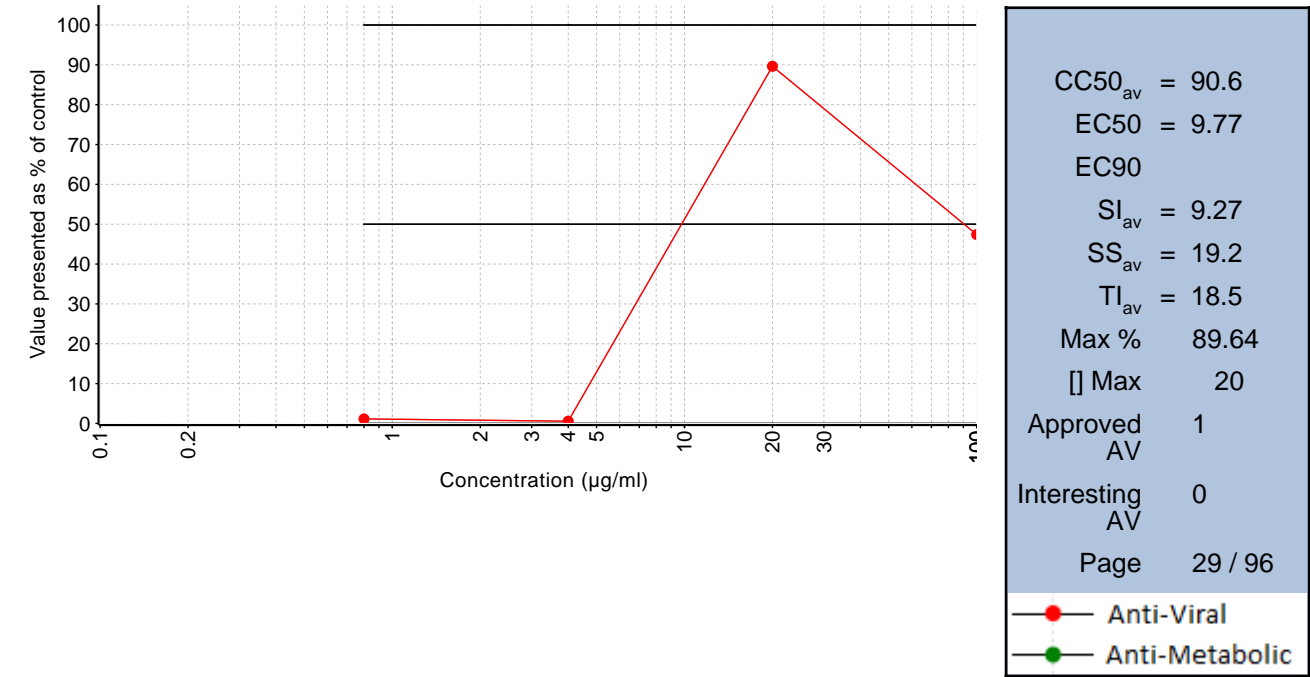

[Export chart data to CSV](#)

| Summary values |        |        |      |
|----------------|--------|--------|------|
| Statistic      | CC50   | EC50   | EC90 |
| Median         | = 90.6 | = 9.77 |      |
| Med.Abs.Dev.   |        |        |      |
| Mean           | = 90.6 | = 9.77 |      |
| Stdev.         |        |        |      |

| Compound       | Virus              |         |             | Cell |         | AV Method  |             | AM Method  |             |
|----------------|--------------------|---------|-------------|------|---------|------------|-------------|------------|-------------|
| Primary code   | Species            | Type    | Strain      | Type | Subtype | Method     | Type        | Method     | Type        |
| BAVAR IE1_0030 | Yellow fever virus | No Type | 17D Stamari | Huh  | 7       | Absorbance | MTS - 498nm | Microscopy | Tox scoring |

Needs more data.

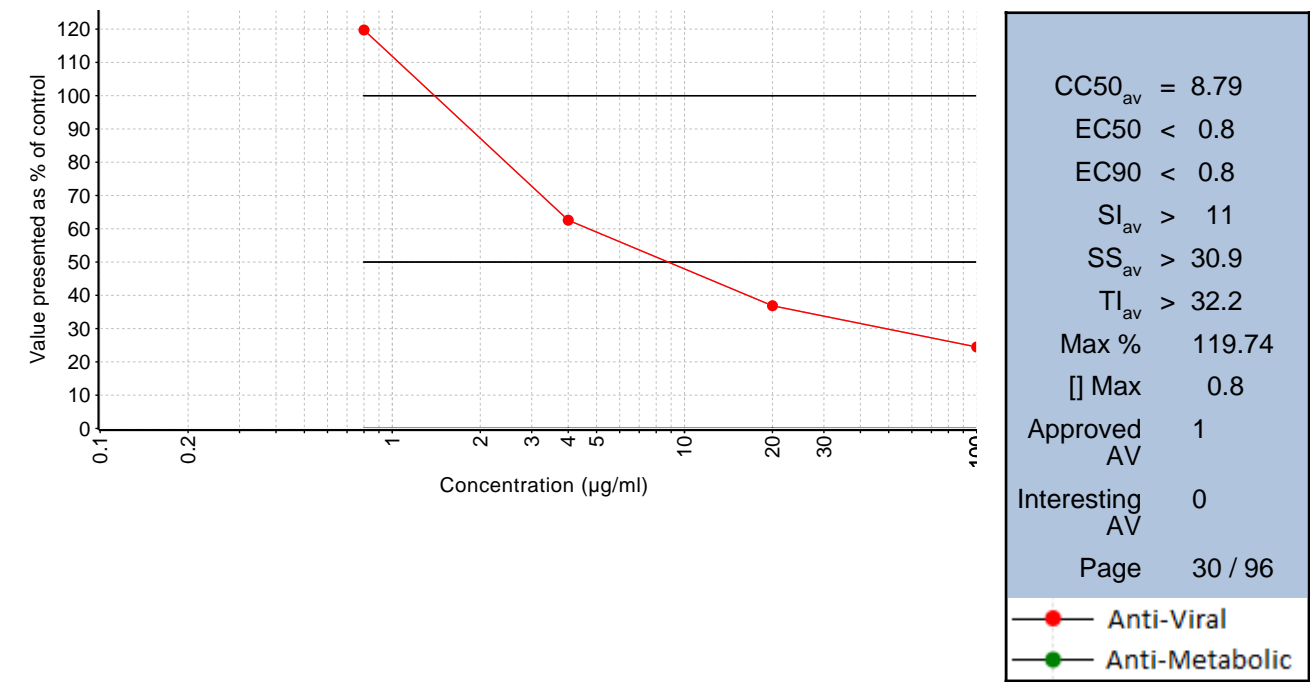

[Export chart data to CSV](#)

| Summary values |        |       |       |
|----------------|--------|-------|-------|
| Statistic      | CC50   | EC50  | EC90  |
| Median         | = 8.79 | < 0.8 | < 0.8 |
| Med.Abs.Dev.   |        |       |       |
| Mean           | = 8.79 | < 0.8 | < 0.8 |
| Stdev.         |        |       |       |

| Compound       | Virus              |         |               | Cell |         | AV Method  |             | AM Method  |             |
|----------------|--------------------|---------|---------------|------|---------|------------|-------------|------------|-------------|
| Primary code   | Species            | Type    | Strain        | Type | Subtype | Method     | Type        | Method     | Type        |
| BAVAR IE1_0031 | Yellow fever virus | No Type | 17D Stamari l | Huh  | 7       | Absorbance | MTS - 498nm | Microscopy | Tox scoring |

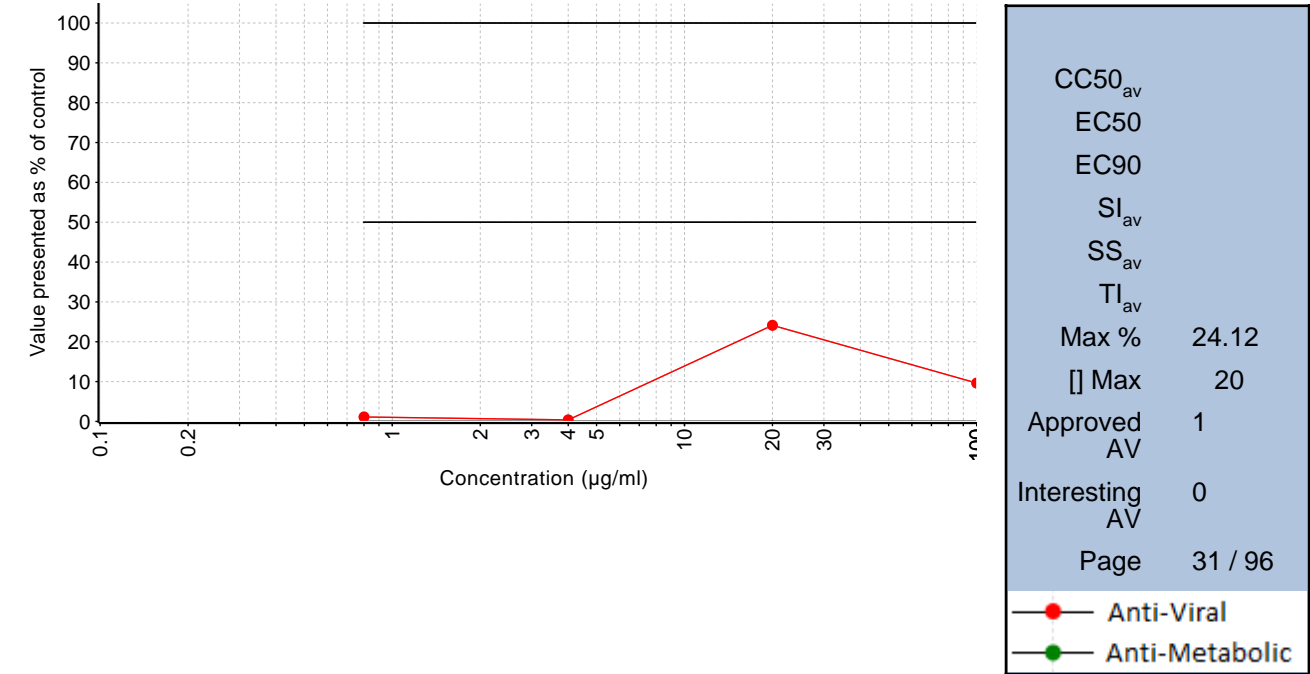

[Export chart data to CSV](#)

| Summary values |      |      |      |
|----------------|------|------|------|
| Statistic      | CC50 | EC50 | EC90 |
| Median         |      |      |      |
| Med.Abs.Dev.   |      |      |      |
| Mean           |      |      |      |
| Stdev.         |      |      |      |



| Compound       | Virus              |         |             | Cell |         | AV Method  |             | AM Method  |             |
|----------------|--------------------|---------|-------------|------|---------|------------|-------------|------------|-------------|
| Primary code   | Species            | Type    | Strain      | Type | Subtype | Method     | Type        | Method     | Type        |
| BAVAR IE1_0032 | Yellow fever virus | No Type | 17D Stamari | Huh  | 7       | Absorbance | MTS - 498nm | Microscopy | Tox scoring |

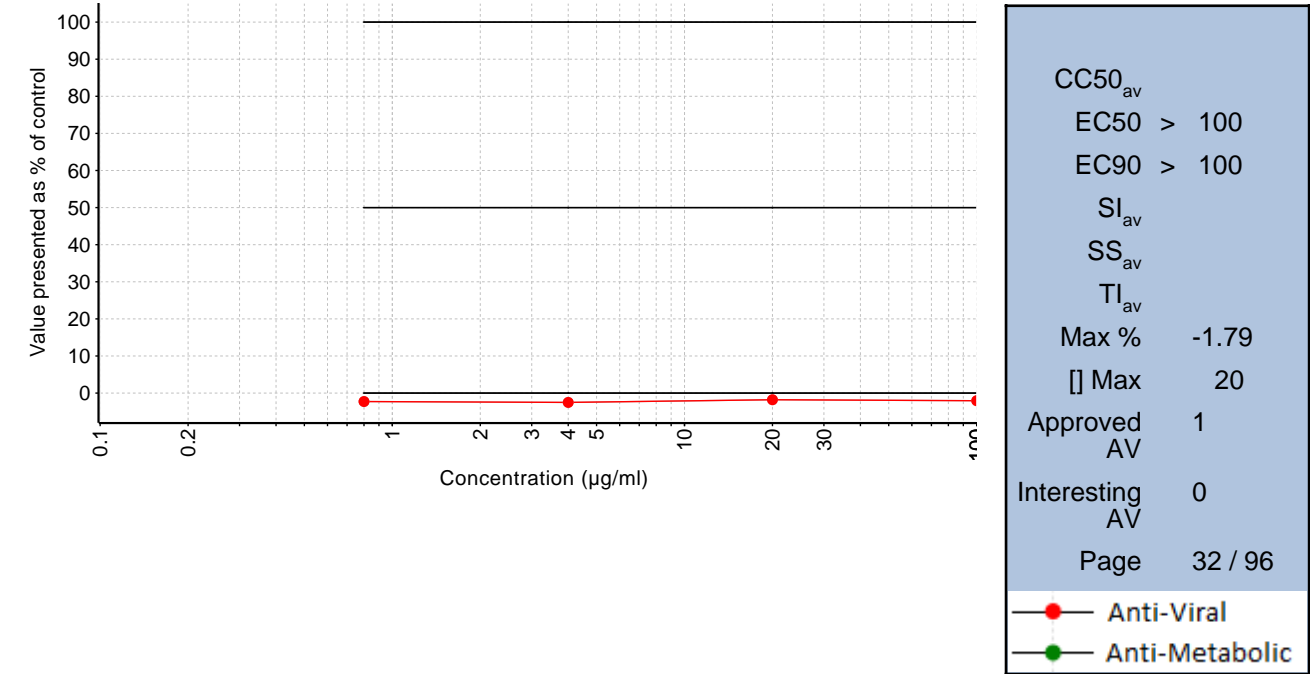

[Export chart data to CSV](#)

| Summary values |      |       |       |
|----------------|------|-------|-------|
| Statistic      | CC50 | EC50  | EC90  |
| Median         |      | > 100 | > 100 |
| Med.Abs.Dev.   |      |       |       |
| Mean           |      | > 100 | > 100 |
| Stdev.         |      |       |       |

| Compound       | Virus              |         |             | Cell |         | AV Method  |             | AM Method  |             |
|----------------|--------------------|---------|-------------|------|---------|------------|-------------|------------|-------------|
| Primary code   | Species            | Type    | Strain      | Type | Subtype | Method     | Type        | Method     | Type        |
| BAVAR IE1_0033 | Yellow fever virus | No Type | 17D Stamari | Huh  | 7       | Absorbance | MTS - 498nm | Microscopy | Tox scoring |

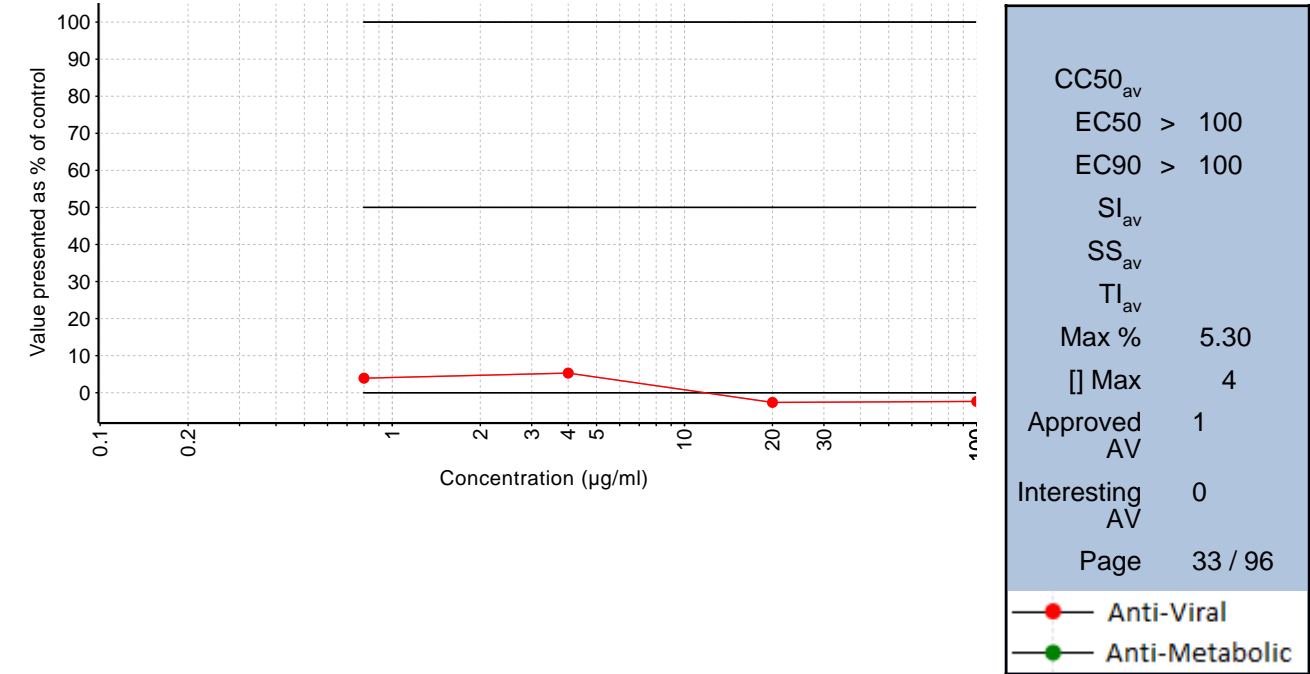

[Export chart data to CSV](#)

| Summary values |      |       |       |
|----------------|------|-------|-------|
| Statistic      | CC50 | EC50  | EC90  |
| Median         |      | > 100 | > 100 |
| Med.Abs.Dev.   |      |       |       |
| Mean           |      | > 100 | > 100 |
| Stdev.         |      |       |       |

| Compound       | Virus              |         |             | Cell |         | AV Method  |             | AM Method  |             |
|----------------|--------------------|---------|-------------|------|---------|------------|-------------|------------|-------------|
| Primary code   | Species            | Type    | Strain      | Type | Subtype | Method     | Type        | Method     | Type        |
| BAVAR IE1_0034 | Yellow fever virus | No Type | 17D Stamari | Huh  | 7       | Absorbance | MTS - 498nm | Microscopy | Tox scoring |

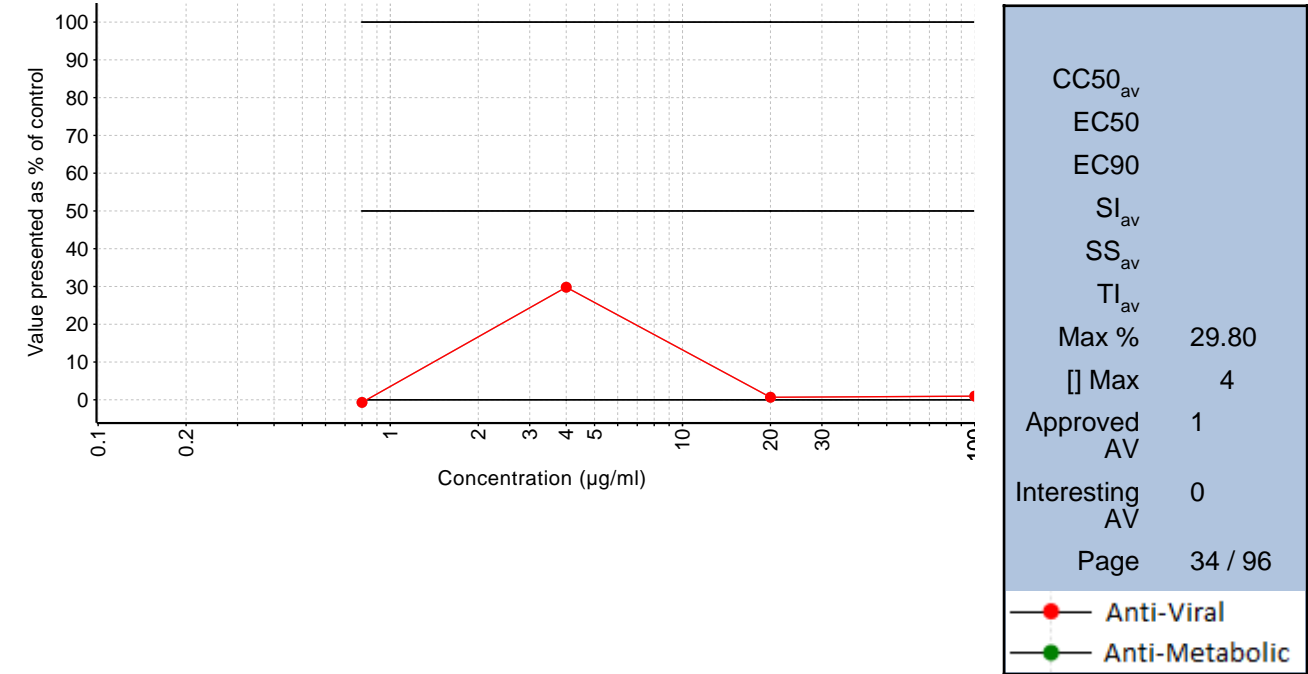

[Export chart data to CSV](#)

| Summary values |      |      |      |
|----------------|------|------|------|
| Statistic      | CC50 | EC50 | EC90 |
| Median         |      |      |      |
| Med.Abs.Dev.   |      |      |      |
| Mean           |      |      |      |
| Stdev.         |      |      |      |

| Compound       | Virus              |         |             | Cell |         | AV Method  |             | AM Method  |             |
|----------------|--------------------|---------|-------------|------|---------|------------|-------------|------------|-------------|
| Primary code   | Species            | Type    | Strain      | Type | Subtype | Method     | Type        | Method     | Type        |
| BAVAR IE1_0035 | Yellow fever virus | No Type | 17D Stamari | Huh  | 7       | Absorbance | MTS - 498nm | Microscopy | Tox scoring |

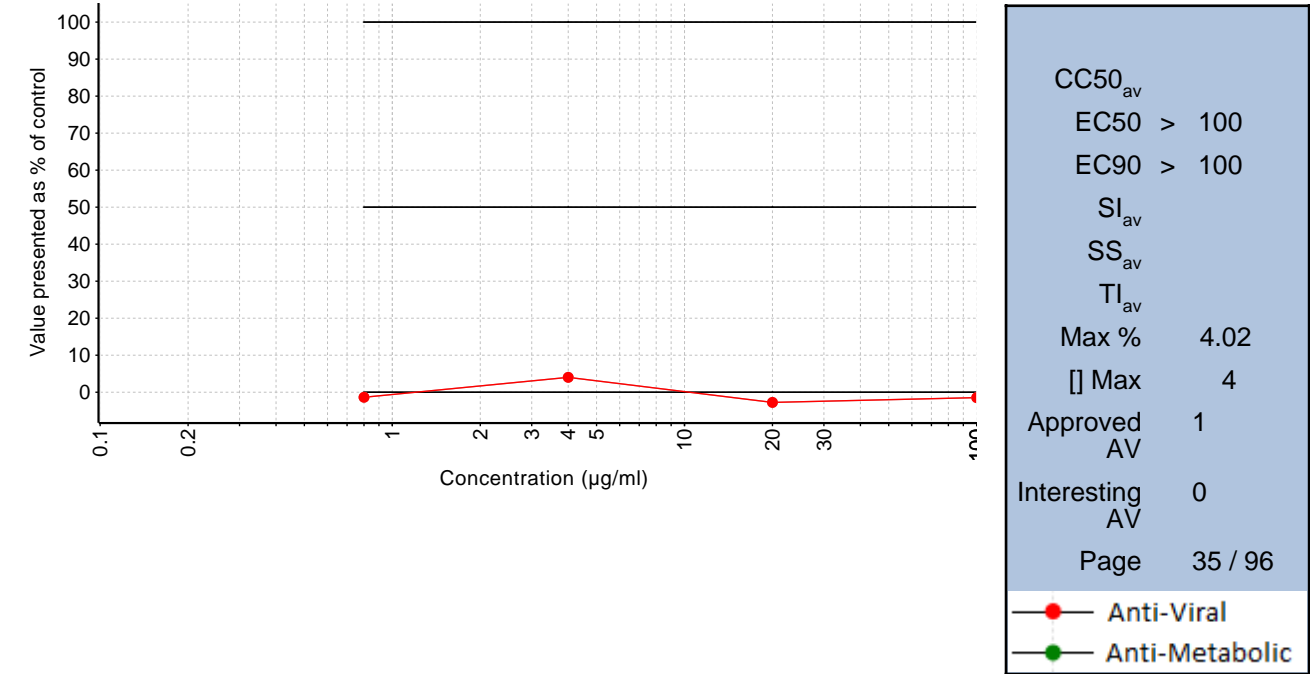

[Export chart data to CSV](#)

| Summary values |      |       |       |
|----------------|------|-------|-------|
| Statistic      | CC50 | EC50  | EC90  |
| Median         |      | > 100 | > 100 |
| Med.Abs.Dev.   |      |       |       |
| Mean           |      | > 100 | > 100 |
| Stdev.         |      |       |       |

| Compound       | Virus              |         |             | Cell |         | AV Method  |             | AM Method  |             |
|----------------|--------------------|---------|-------------|------|---------|------------|-------------|------------|-------------|
| Primary code   | Species            | Type    | Strain      | Type | Subtype | Method     | Type        | Method     | Type        |
| BAVAR IE1_0036 | Yellow fever virus | No Type | 17D Stamari | Huh  | 7       | Absorbance | MTS - 498nm | Microscopy | Tox scoring |

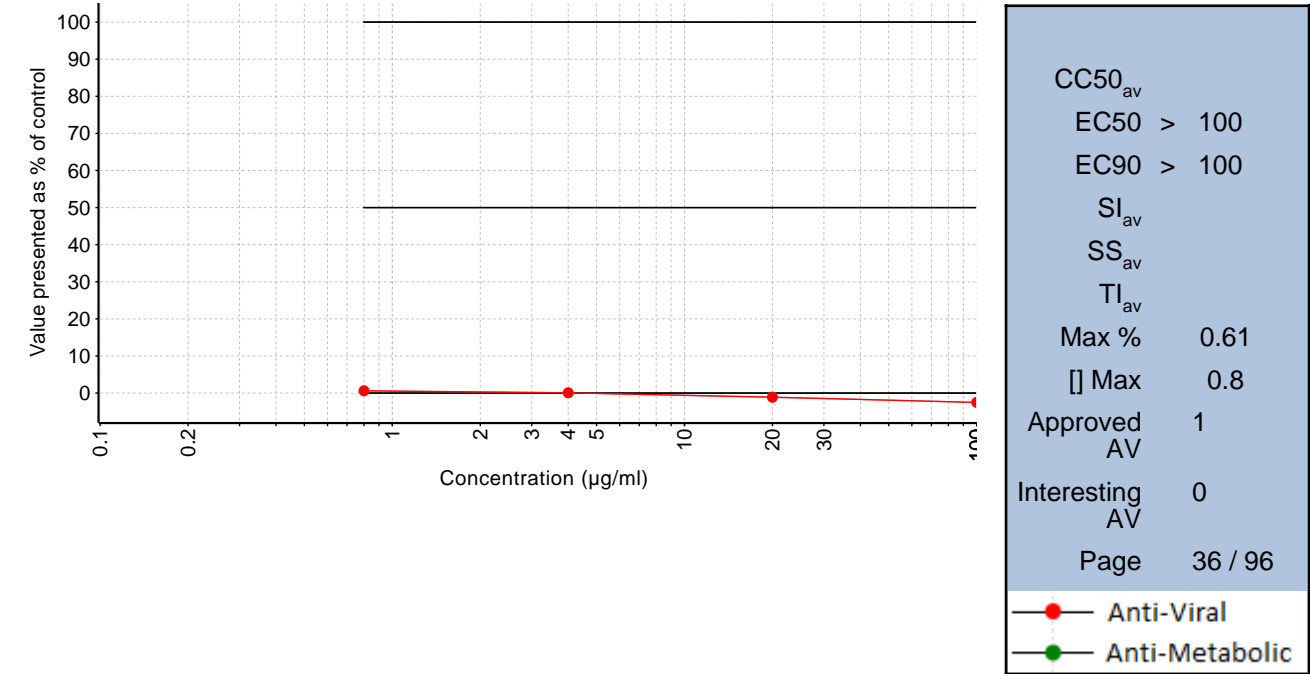

[Export chart data to CSV](#)

| Summary values |      |       |       |
|----------------|------|-------|-------|
| Statistic      | CC50 | EC50  | EC90  |
| Median         |      | > 100 | > 100 |
| Med.Abs.Dev.   |      |       |       |
| Mean           |      | > 100 | > 100 |
| Stdev.         |      |       |       |

| Compound       | Virus              |         |             | Cell |         | AV Method  |             | AM Method  |             |
|----------------|--------------------|---------|-------------|------|---------|------------|-------------|------------|-------------|
| Primary code   | Species            | Type    | Strain      | Type | Subtype | Method     | Type        | Method     | Type        |
| BAVAR IE1_0037 | Yellow fever virus | No Type | 17D Stamari | Huh  | 7       | Absorbance | MTS - 498nm | Microscopy | Tox scoring |

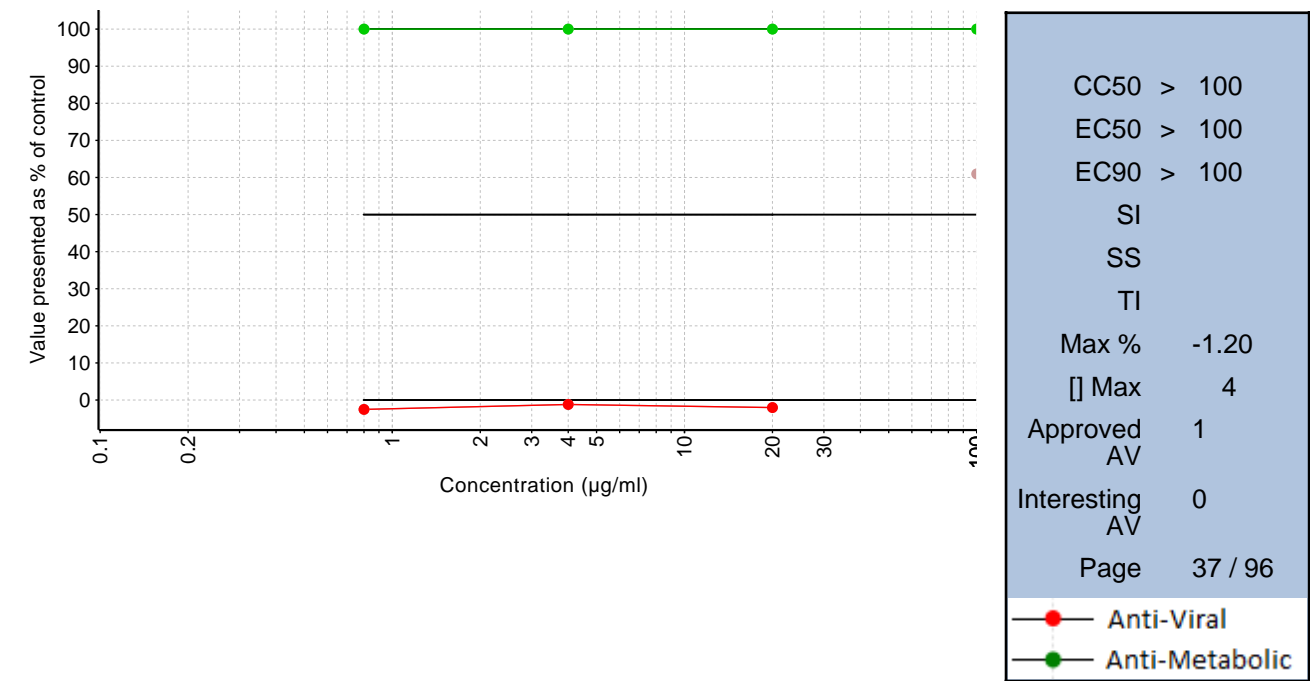

[Export chart data to CSV](#)

| Summary values |      |      |      |
|----------------|------|------|------|
| Statistic      | CC50 | EC50 | EC90 |
| Median         |      | > 20 | > 20 |
| Med.Abs.Dev.   |      |      |      |
| Mean           |      | > 20 | > 20 |
| Stdev.         |      |      |      |

| Compound       | Virus              |         |             | Cell |         | AV Method  |             | AM Method  |             |
|----------------|--------------------|---------|-------------|------|---------|------------|-------------|------------|-------------|
| Primary code   | Species            | Type    | Strain      | Type | Subtype | Method     | Type        | Method     | Type        |
| BAVAR IE1_0038 | Yellow fever virus | No Type | 17D Stamari | Huh  | 7       | Absorbance | MTS - 498nm | Microscopy | Tox scoring |

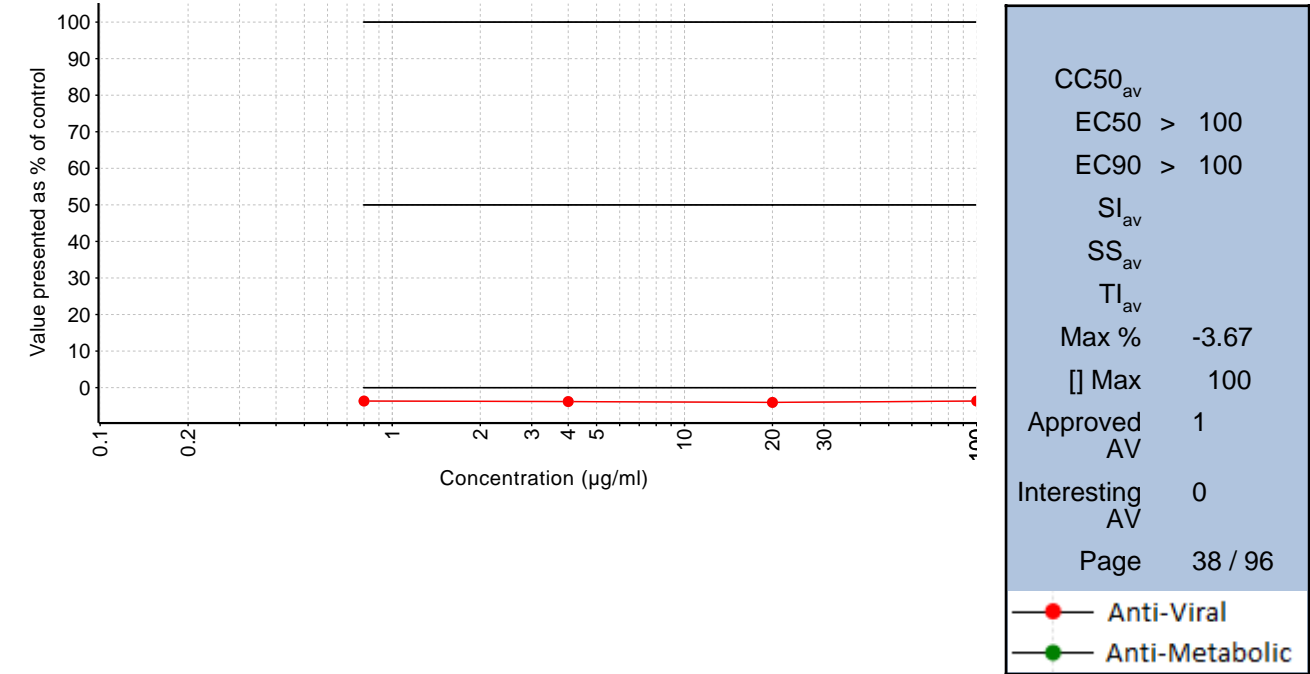

[Export chart data to CSV](#)

| Summary values |      |       |       |
|----------------|------|-------|-------|
| Statistic      | CC50 | EC50  | EC90  |
| Median         |      | > 100 | > 100 |
| Med.Abs.Dev.   |      |       |       |
| Mean           |      | > 100 | > 100 |
| Stdev.         |      |       |       |

| Compound       | Virus              |         |             | Cell |         | AV Method  |             | AM Method  |             |
|----------------|--------------------|---------|-------------|------|---------|------------|-------------|------------|-------------|
| Primary code   | Species            | Type    | Strain      | Type | Subtype | Method     | Type        | Method     | Type        |
| BAVAR IE1_0039 | Yellow fever virus | No Type | 17D Stamari | Huh  | 7       | Absorbance | MTS - 498nm | Microscopy | Tox scoring |

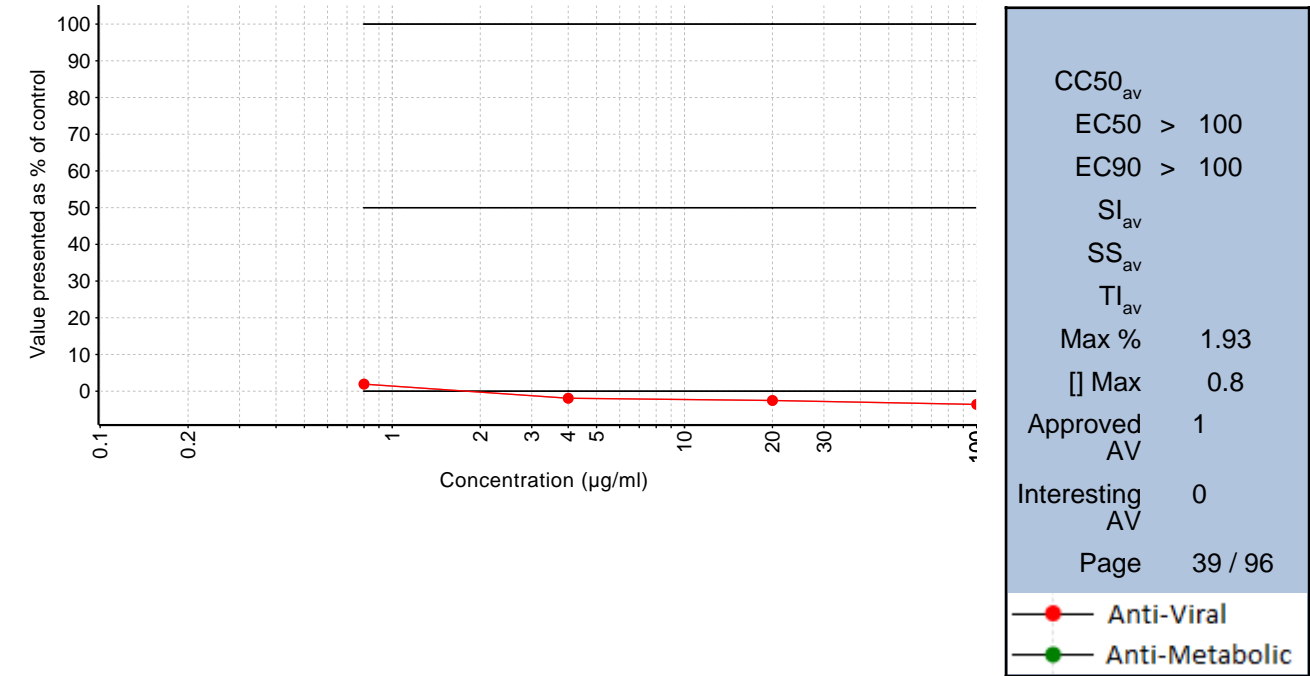

[Export chart data to CSV](#)

| Summary values |      |       |       |
|----------------|------|-------|-------|
| Statistic      | CC50 | EC50  | EC90  |
| Median         |      | > 100 | > 100 |
| Med.Abs.Dev.   |      |       |       |
| Mean           |      | > 100 | > 100 |
| Stdev.         |      |       |       |



| Compound       | Virus              |         |             | Cell |         | AV Method  |             | AM Method  |             |
|----------------|--------------------|---------|-------------|------|---------|------------|-------------|------------|-------------|
| Primary code   | Species            | Type    | Strain      | Type | Subtype | Method     | Type        | Method     | Type        |
| BAVAR IE1_0040 | Yellow fever virus | No Type | 17D Stamari | Huh  | 7       | Absorbance | MTS - 498nm | Microscopy | Tox scoring |

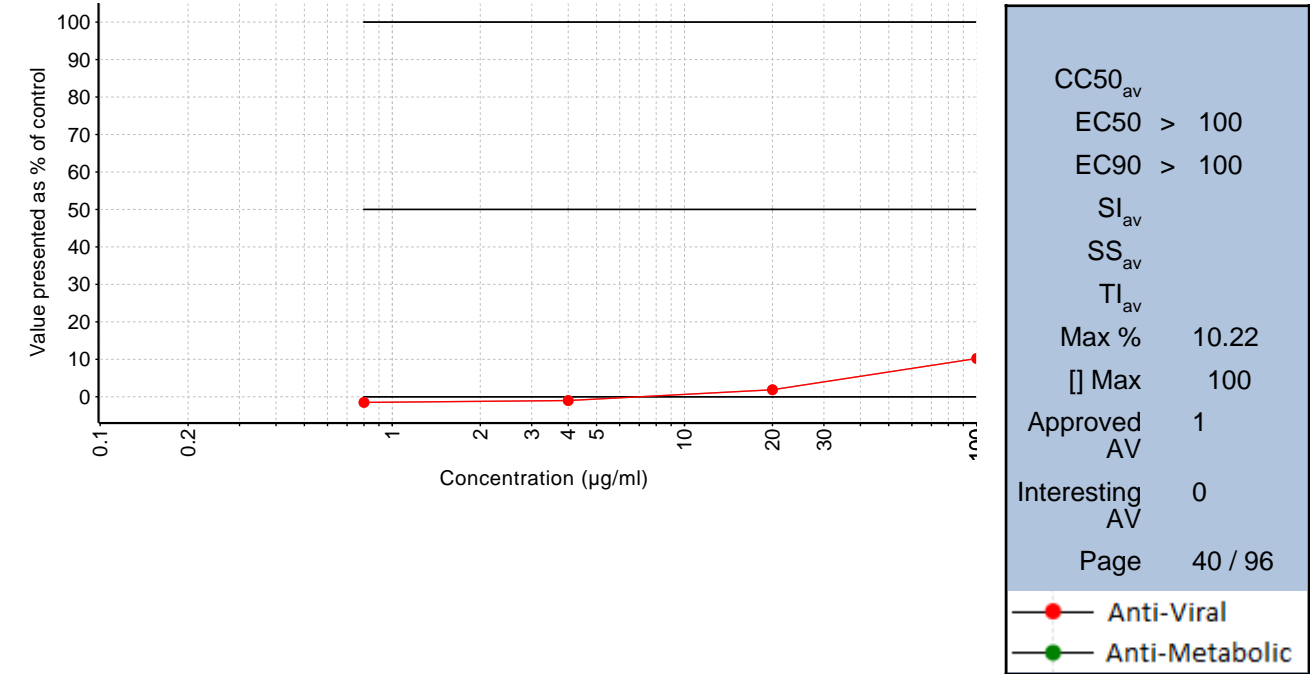

[Export chart data to CSV](#)

| Summary values |      |       |       |
|----------------|------|-------|-------|
| Statistic      | CC50 | EC50  | EC90  |
| Median         |      | > 100 | > 100 |
| Med.Abs.Dev.   |      |       |       |
| Mean           |      | > 100 | > 100 |
| Stdev.         |      |       |       |

| Compound       | Virus              |         |             | Cell |         | AV Method  |             | AM Method  |             |
|----------------|--------------------|---------|-------------|------|---------|------------|-------------|------------|-------------|
| Primary code   | Species            | Type    | Strain      | Type | Subtype | Method     | Type        | Method     | Type        |
| BAVAR IE1_0041 | Yellow fever virus | No Type | 17D Stamari | Huh  | 7       | Absorbance | MTS - 498nm | Microscopy | Tox scoring |

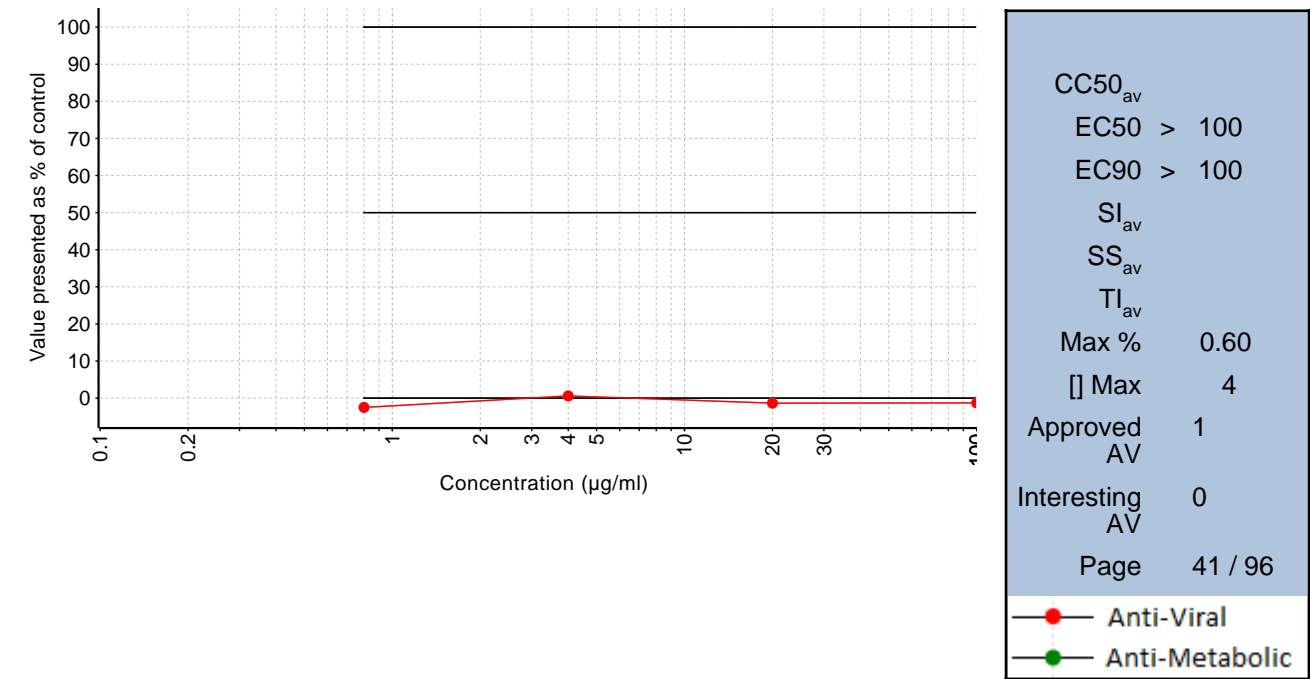

[Export chart data to CSV](#)

| Summary values |      |       |       |
|----------------|------|-------|-------|
| Statistic      | CC50 | EC50  | EC90  |
| Median         |      | > 100 | > 100 |
| Med.Abs.Dev.   |      |       |       |
| Mean           |      | > 100 | > 100 |
| Stdev.         |      |       |       |

| Compound       | Virus              |         |             | Cell |         | AV Method  |             | AM Method  |             |
|----------------|--------------------|---------|-------------|------|---------|------------|-------------|------------|-------------|
| Primary code   | Species            | Type    | Strain      | Type | Subtype | Method     | Type        | Method     | Type        |
| BAVAR IE1_0042 | Yellow fever virus | No Type | 17D Stamari | Huh  | 7       | Absorbance | MTS - 498nm | Microscopy | Tox scoring |

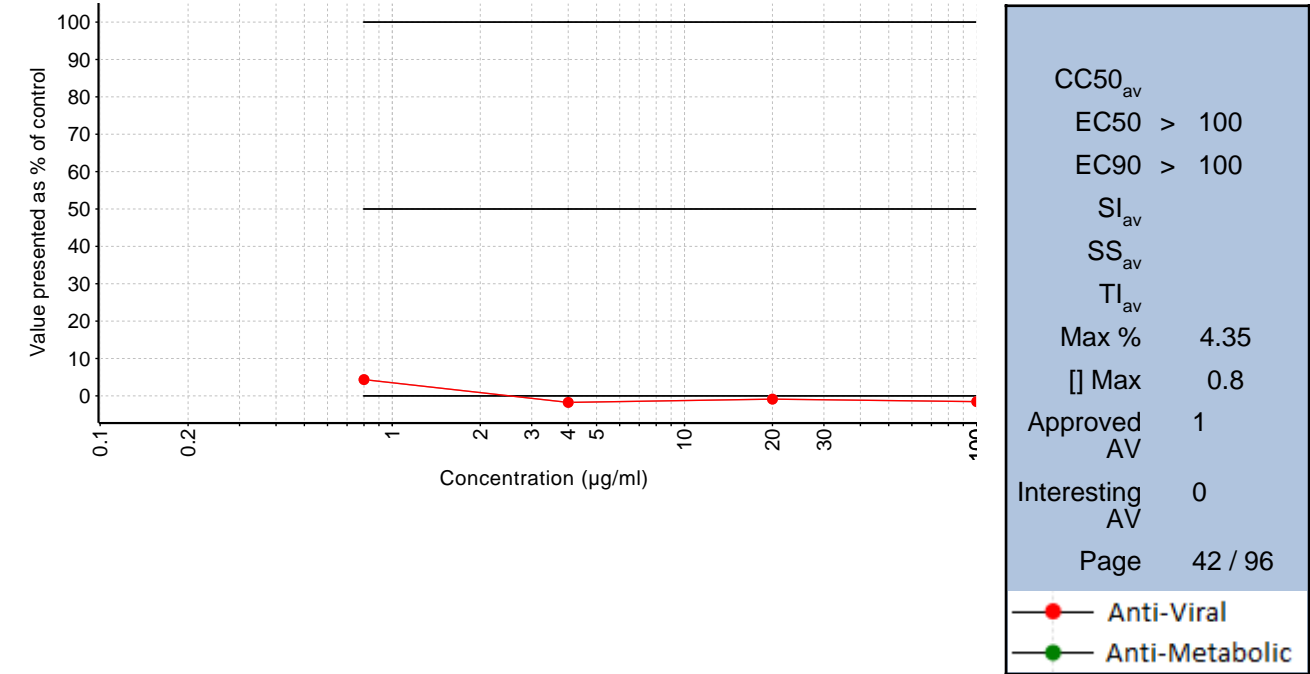

[Export chart data to CSV](#)

| Summary values |      |       |       |
|----------------|------|-------|-------|
| Statistic      | CC50 | EC50  | EC90  |
| Median         |      | > 100 | > 100 |
| Med.Abs.Dev.   |      |       |       |
| Mean           |      | > 100 | > 100 |
| Stdev.         |      |       |       |

| Compound       | Virus              |         |             | Cell |         | AV Method  |             | AM Method  |             |
|----------------|--------------------|---------|-------------|------|---------|------------|-------------|------------|-------------|
| Primary code   | Species            | Type    | Strain      | Type | Subtype | Method     | Type        | Method     | Type        |
| BAVAR IE1_0043 | Yellow fever virus | No Type | 17D Stamari | Huh  | 7       | Absorbance | MTS - 498nm | Microscopy | Tox scoring |

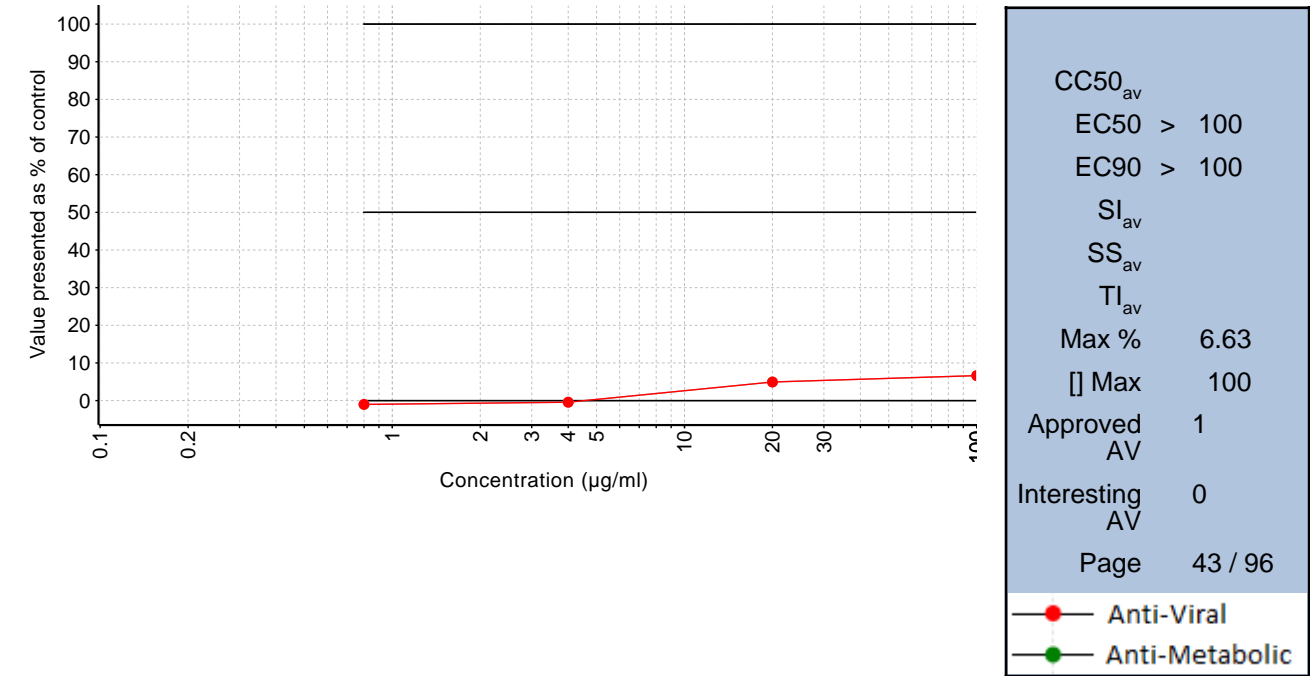

[Export chart data to CSV](#)

| Summary values |      |       |       |
|----------------|------|-------|-------|
| Statistic      | CC50 | EC50  | EC90  |
| Median         |      | > 100 | > 100 |
| Med.Abs.Dev.   |      |       |       |
| Mean           |      | > 100 | > 100 |
| Stdev.         |      |       |       |

| Compound       | Virus              |         |             | Cell |         | AV Method  |             | AM Method  |             |
|----------------|--------------------|---------|-------------|------|---------|------------|-------------|------------|-------------|
| Primary code   | Species            | Type    | Strain      | Type | Subtype | Method     | Type        | Method     | Type        |
| BAVAR IE1_0044 | Yellow fever virus | No Type | 17D Stamari | Huh  | 7       | Absorbance | MTS - 498nm | Microscopy | Tox scoring |

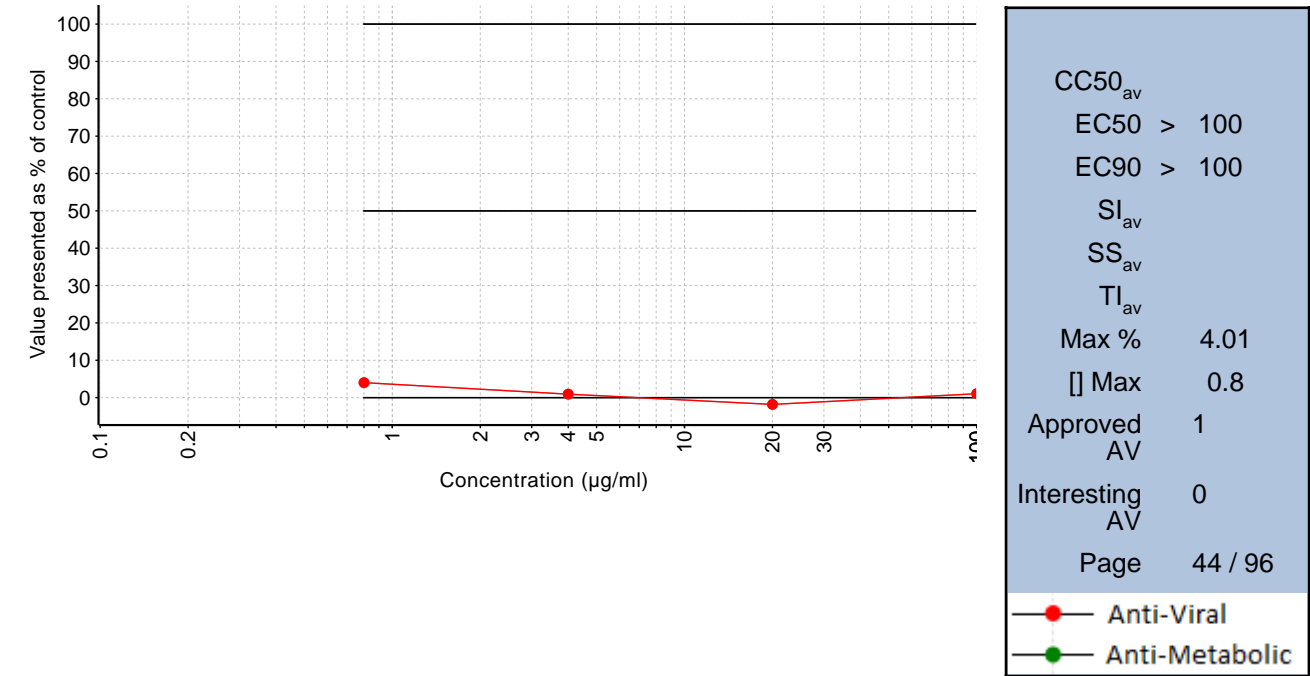

[Export chart data to CSV](#)

| Summary values |      |       |       |
|----------------|------|-------|-------|
| Statistic      | CC50 | EC50  | EC90  |
| Median         |      | > 100 | > 100 |
| Med.Abs.Dev.   |      |       |       |
| Mean           |      | > 100 | > 100 |
| Stdev.         |      |       |       |

| Compound       | Virus              |         |             | Cell |         | AV Method  |             | AM Method  |             |
|----------------|--------------------|---------|-------------|------|---------|------------|-------------|------------|-------------|
| Primary code   | Species            | Type    | Strain      | Type | Subtype | Method     | Type        | Method     | Type        |
| BAVAR IE1_0045 | Yellow fever virus | No Type | 17D Stamari | Huh  | 7       | Absorbance | MTS - 498nm | Microscopy | Tox scoring |

Needs more data.

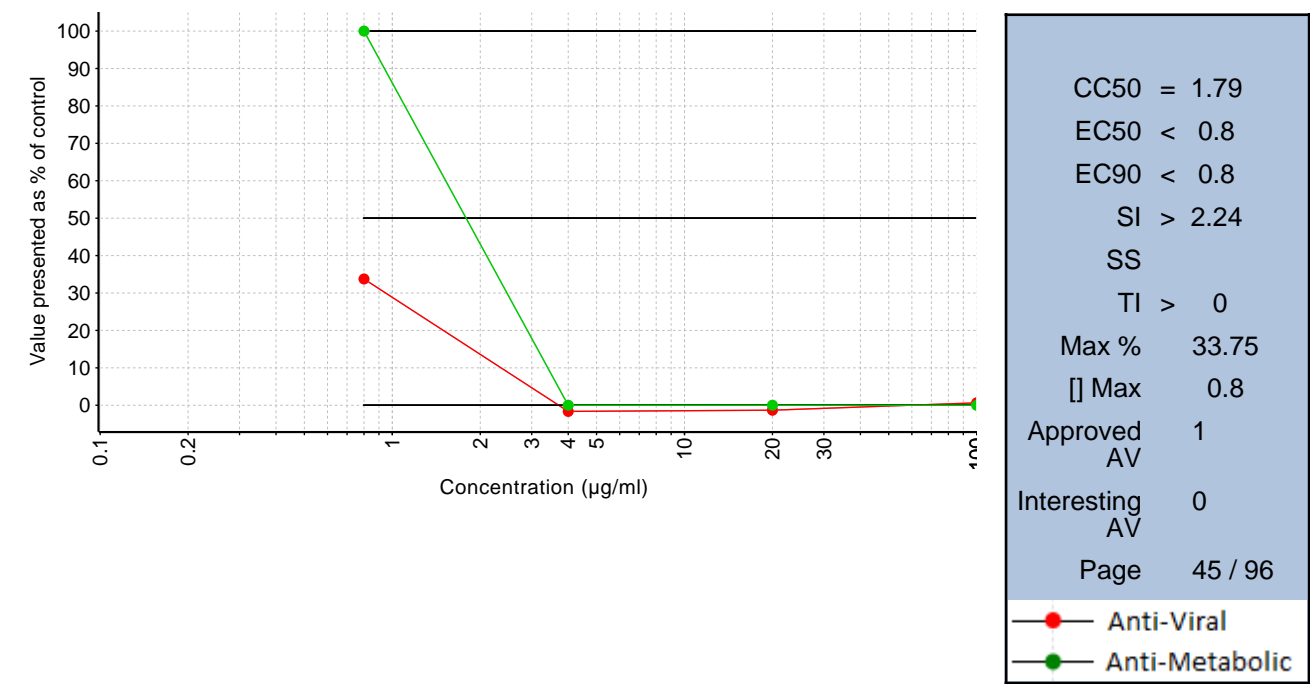

[Export chart data to CSV](#)

| Summary values |        |       |       |
|----------------|--------|-------|-------|
| Statistic      | CC50   | EC50  | EC90  |
| Median         | = 1.79 | < 0.8 | < 0.8 |
| Med.Abs.Dev.   |        |       |       |
| Mean           | = 1.79 | < 0.8 | < 0.8 |
| Stdev.         |        |       |       |

| Compound       | Virus              |         |             | Cell |         | AV Method  |             | AM Method  |             |
|----------------|--------------------|---------|-------------|------|---------|------------|-------------|------------|-------------|
| Primary code   | Species            | Type    | Strain      | Type | Subtype | Method     | Type        | Method     | Type        |
| BAVAR IE1_0046 | Yellow fever virus | No Type | 17D Stamari | Huh  | 7       | Absorbance | MTS - 498nm | Microscopy | Tox scoring |

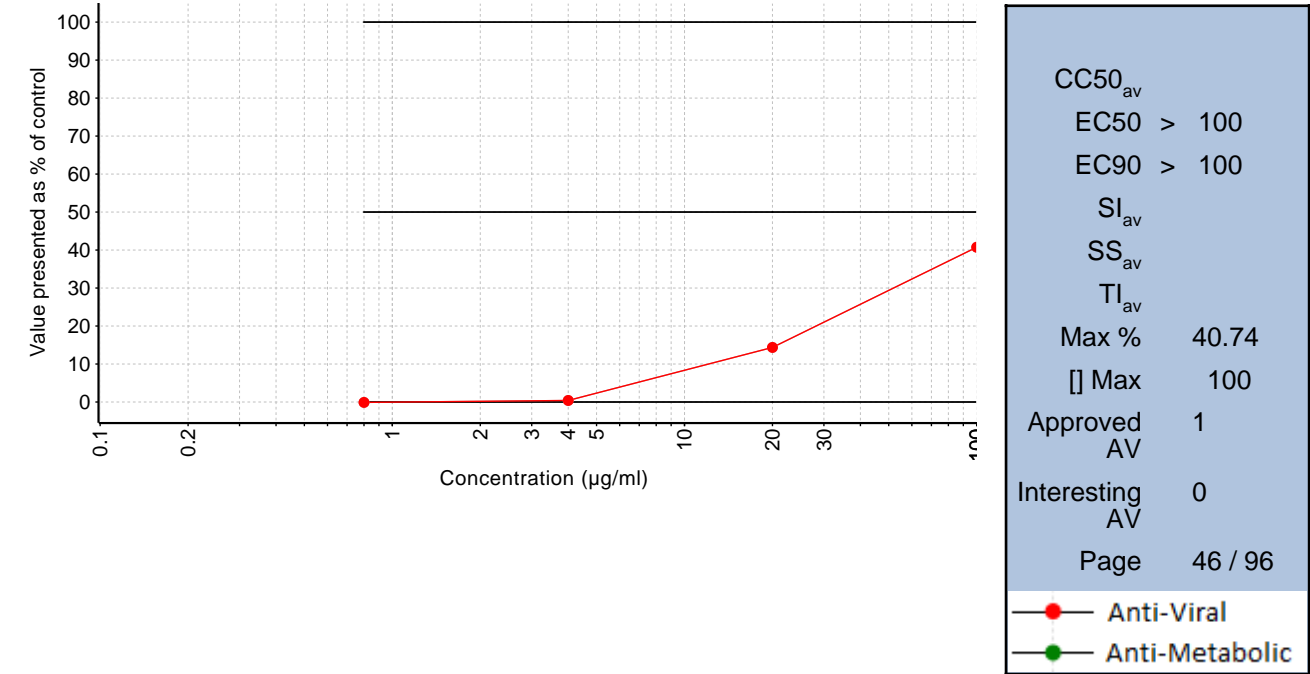

[Export chart data to CSV](#)

| Summary values |      |       |       |
|----------------|------|-------|-------|
| Statistic      | CC50 | EC50  | EC90  |
| Median         |      | > 100 | > 100 |
| Med.Abs.Dev.   |      |       |       |
| Mean           |      | > 100 | > 100 |
| Stdev.         |      |       |       |

| Compound       | Virus              |         |             | Cell |         | AV Method  |             | AM Method  |             |
|----------------|--------------------|---------|-------------|------|---------|------------|-------------|------------|-------------|
| Primary code   | Species            | Type    | Strain      | Type | Subtype | Method     | Type        | Method     | Type        |
| BAVAR IE1_0047 | Yellow fever virus | No Type | 17D Stamari | Huh  | 7       | Absorbance | MTS - 498nm | Microscopy | Tox scoring |

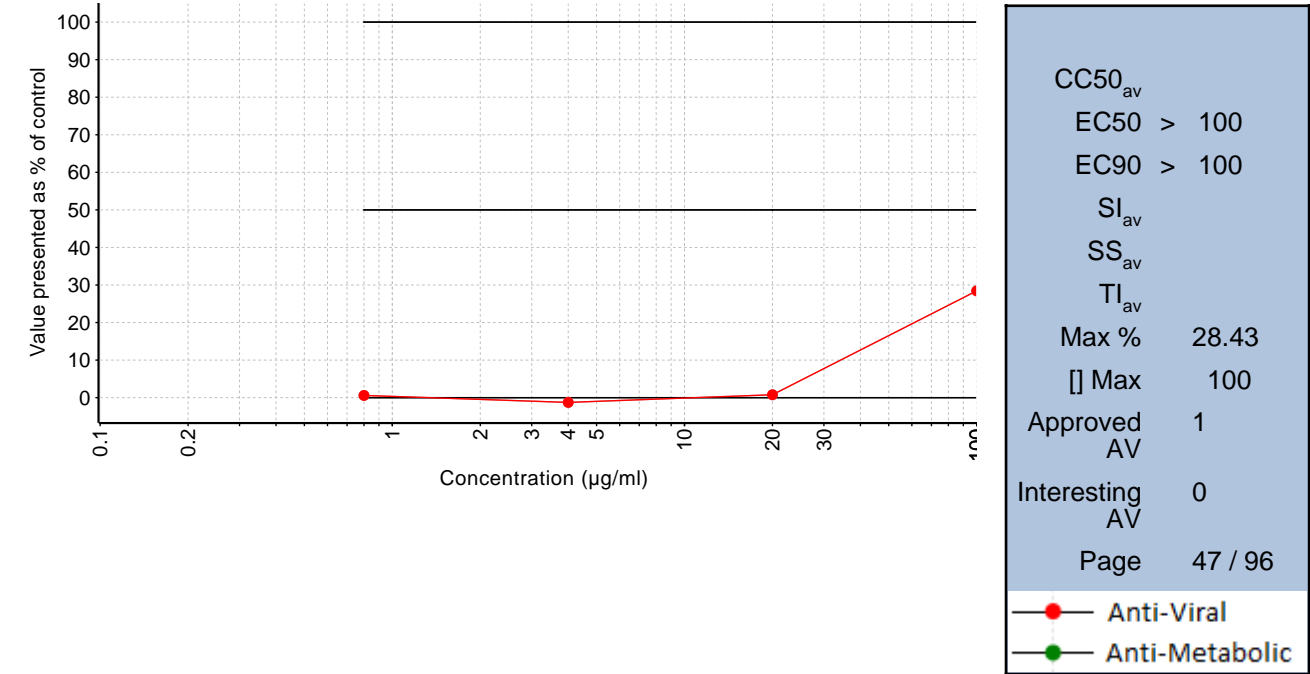

[Export chart data to CSV](#)

| Summary values |      |       |       |
|----------------|------|-------|-------|
| Statistic      | CC50 | EC50  | EC90  |
| Median         |      | > 100 | > 100 |
| Med.Abs.Dev.   |      |       |       |
| Mean           |      | > 100 | > 100 |
| Stdev.         |      |       |       |



| Compound       | Virus              |         |             | Cell |         | AV Method  |             | AM Method  |             |
|----------------|--------------------|---------|-------------|------|---------|------------|-------------|------------|-------------|
| Primary code   | Species            | Type    | Strain      | Type | Subtype | Method     | Type        | Method     | Type        |
| BAVAR IE1_0048 | Yellow fever virus | No Type | 17D Stamari | Huh  | 7       | Absorbance | MTS - 498nm | Microscopy | Tox scoring |

Needs more data.

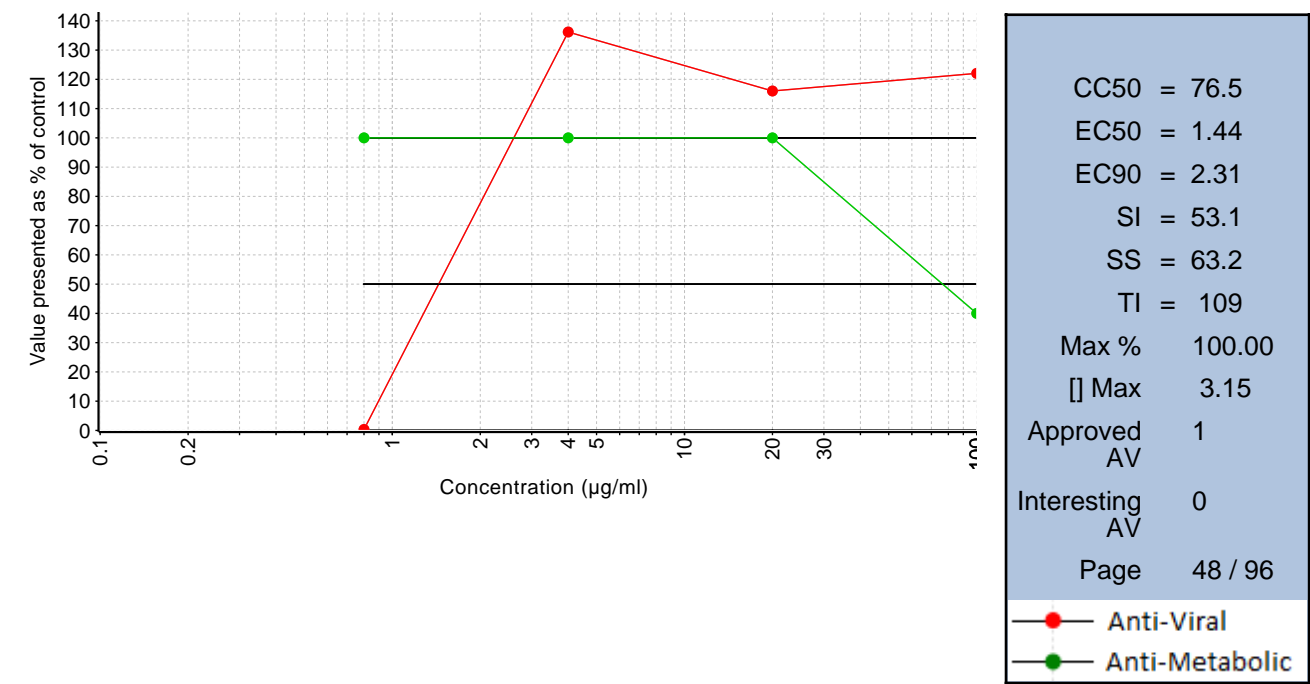

[Export chart data to CSV](#)

| Summary values |        |        |        |
|----------------|--------|--------|--------|
| Statistic      | CC50   | EC50   | EC90   |
| Median         | = 76.5 | = 1.44 | = 2.31 |
| Med.Abs.Dev.   |        |        |        |
| Mean           | = 76.5 | = 1.44 | = 2.31 |
| Stdev.         |        |        |        |

| Compound       | Virus              |         |             | Cell |         | AV Method  |             | AM Method  |             |
|----------------|--------------------|---------|-------------|------|---------|------------|-------------|------------|-------------|
| Primary code   | Species            | Type    | Strain      | Type | Subtype | Method     | Type        | Method     | Type        |
| BAVAR IE1_0049 | Yellow fever virus | No Type | 17D Stamari | Huh  | 7       | Absorbance | MTS - 498nm | Microscopy | Tox scoring |

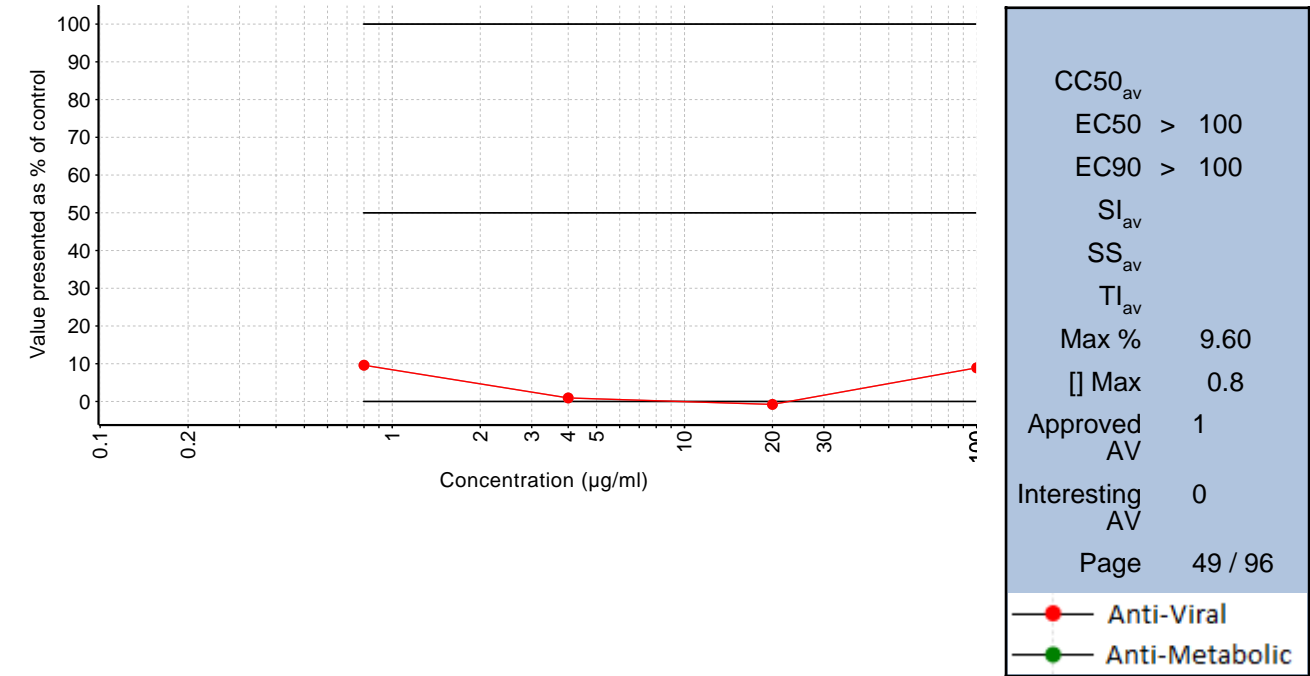

[Export chart data to CSV](#)

| Summary values |      |       |       |
|----------------|------|-------|-------|
| Statistic      | CC50 | EC50  | EC90  |
| Median         |      | > 100 | > 100 |
| Med.Abs.Dev.   |      |       |       |
| Mean           |      | > 100 | > 100 |
| Stdev.         |      |       |       |

| Compound       | Virus              |         |             | Cell |         | AV Method  |             | AM Method  |             |
|----------------|--------------------|---------|-------------|------|---------|------------|-------------|------------|-------------|
| Primary code   | Species            | Type    | Strain      | Type | Subtype | Method     | Type        | Method     | Type        |
| BAVAR IE1_0050 | Yellow fever virus | No Type | 17D Stamari | Huh  | 7       | Absorbance | MTS - 498nm | Microscopy | Tox scoring |

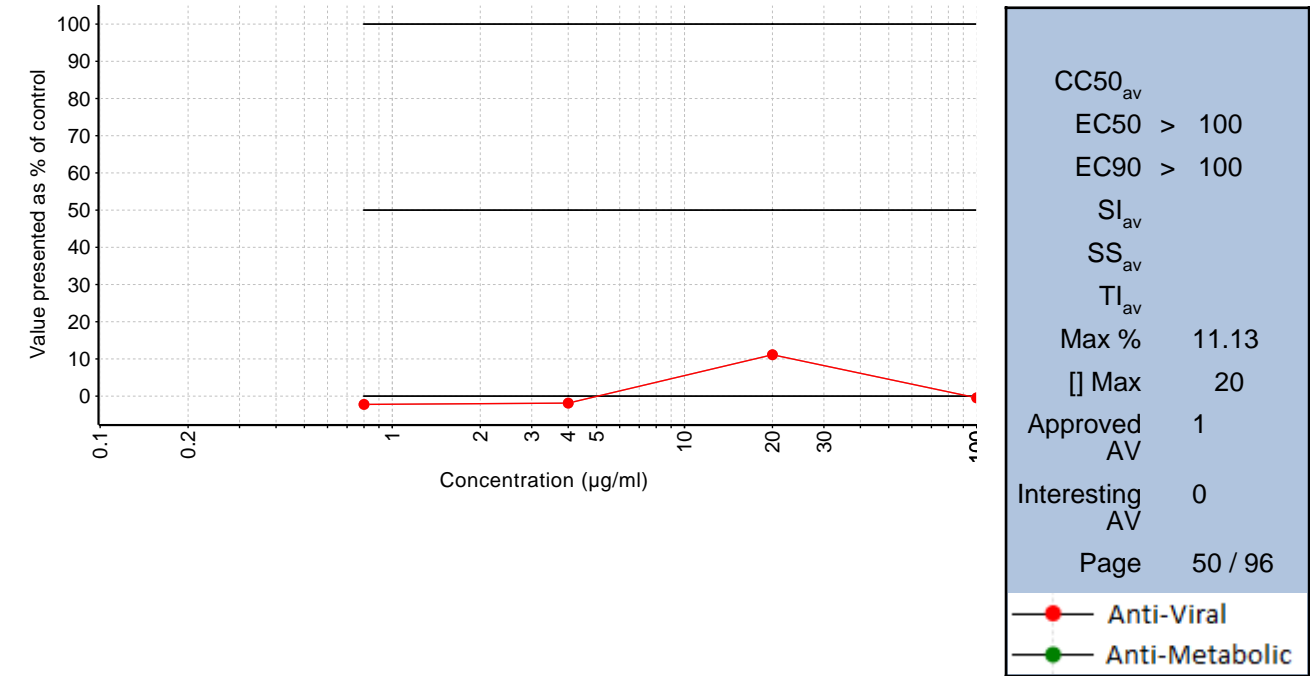

[Export chart data to CSV](#)

| Summary values |      |       |       |
|----------------|------|-------|-------|
| Statistic      | CC50 | EC50  | EC90  |
| Median         |      | > 100 | > 100 |
| Med.Abs.Dev.   |      |       |       |
| Mean           |      | > 100 | > 100 |
| Stdev.         |      |       |       |

| Compound       | Virus              |         |             | Cell |         | AV Method  |             | AM Method  |             |
|----------------|--------------------|---------|-------------|------|---------|------------|-------------|------------|-------------|
| Primary code   | Species            | Type    | Strain      | Type | Subtype | Method     | Type        | Method     | Type        |
| BAVAR IE1_0051 | Yellow fever virus | No Type | 17D Stamari | Huh  | 7       | Absorbance | MTS - 498nm | Microscopy | Tox scoring |

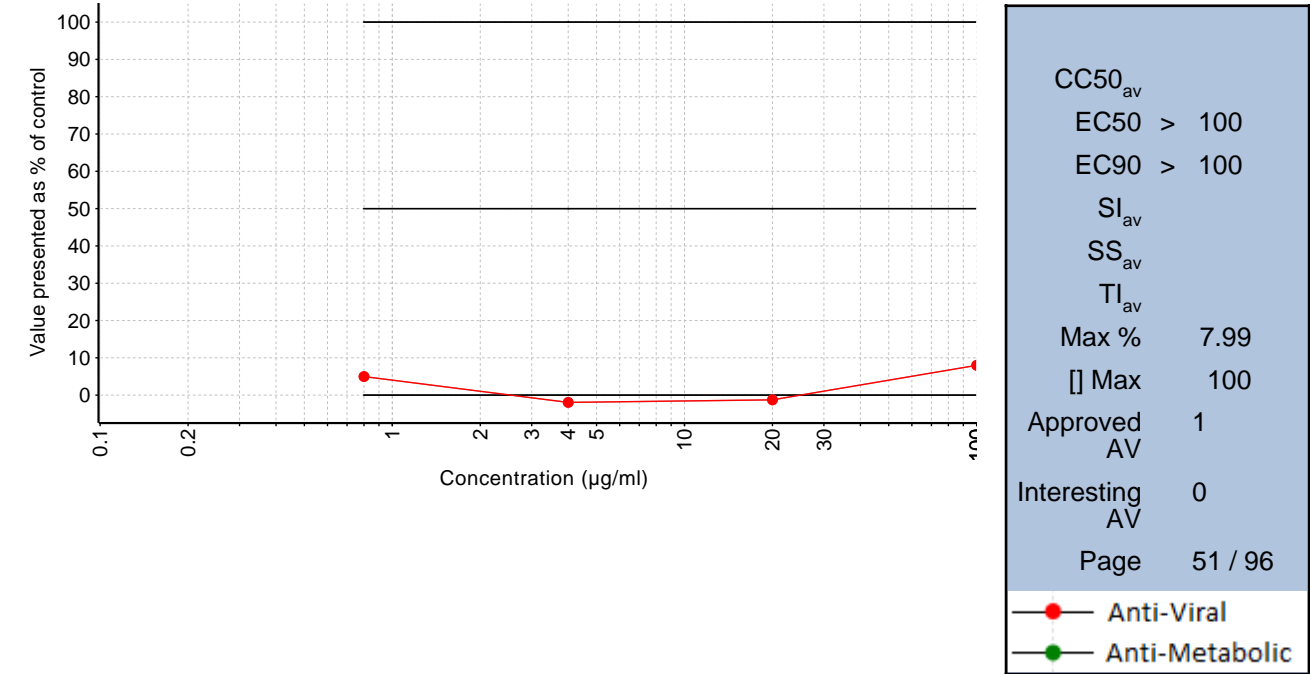

[Export chart data to CSV](#)

| Summary values |      |       |       |
|----------------|------|-------|-------|
| Statistic      | CC50 | EC50  | EC90  |
| Median         |      | > 100 | > 100 |
| Med.Abs.Dev.   |      |       |       |
| Mean           |      | > 100 | > 100 |
| Stdev.         |      |       |       |

| Compound       | Virus              |         |             | Cell |         | AV Method  |             | AM Method  |             |
|----------------|--------------------|---------|-------------|------|---------|------------|-------------|------------|-------------|
| Primary code   | Species            | Type    | Strain      | Type | Subtype | Method     | Type        | Method     | Type        |
| BAVAR IE1_0052 | Yellow fever virus | No Type | 17D Stamari | Huh  | 7       | Absorbance | MTS - 498nm | Microscopy | Tox scoring |

Needs more data.

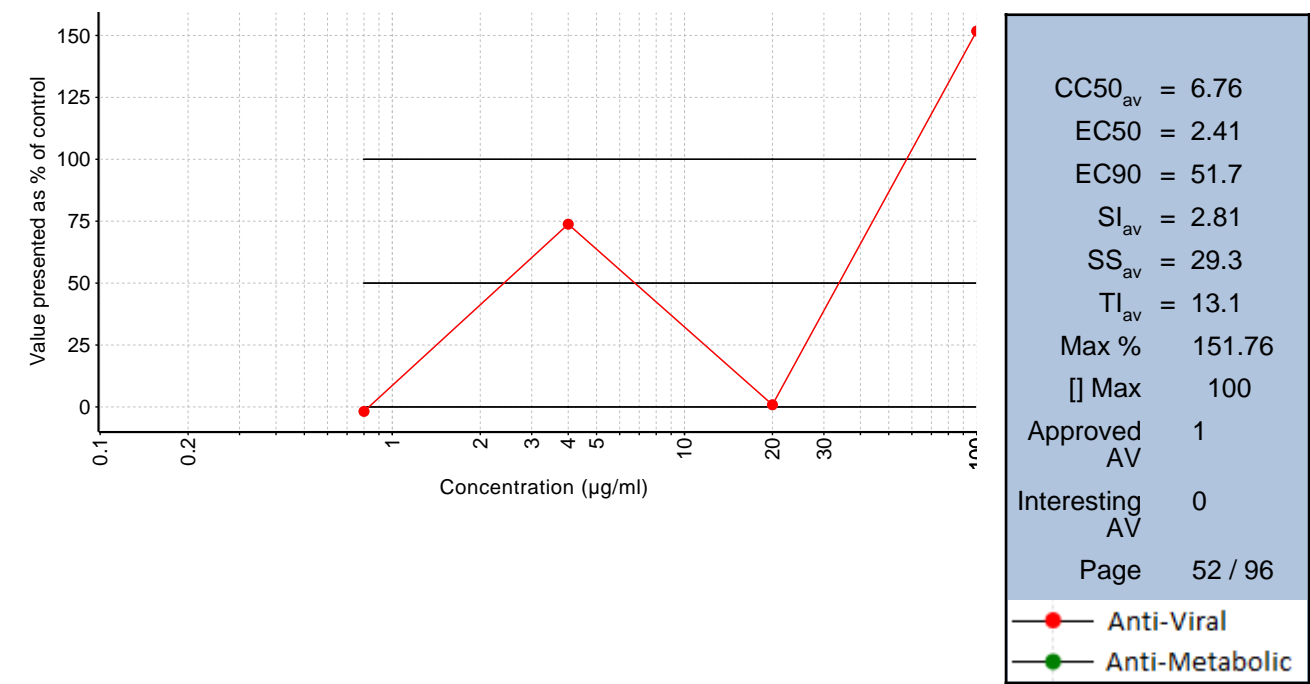

[Export chart data to CSV](#)

| Summary values |        |        |        |
|----------------|--------|--------|--------|
| Statistic      | CC50   | EC50   | EC90   |
| Median         | = 6.76 | = 2.41 | = 51.7 |
| Med.Abs.Dev.   |        |        |        |
| Mean           | = 6.76 | = 2.41 | = 51.7 |
| Stdev.         |        |        |        |

| Compound       | Virus              |         |             | Cell |         | AV Method  |             | AM Method  |             |
|----------------|--------------------|---------|-------------|------|---------|------------|-------------|------------|-------------|
| Primary code   | Species            | Type    | Strain      | Type | Subtype | Method     | Type        | Method     | Type        |
| BAVAR IE1_0053 | Yellow fever virus | No Type | 17D Stamari | Huh  | 7       | Absorbance | MTS - 498nm | Microscopy | Tox scoring |

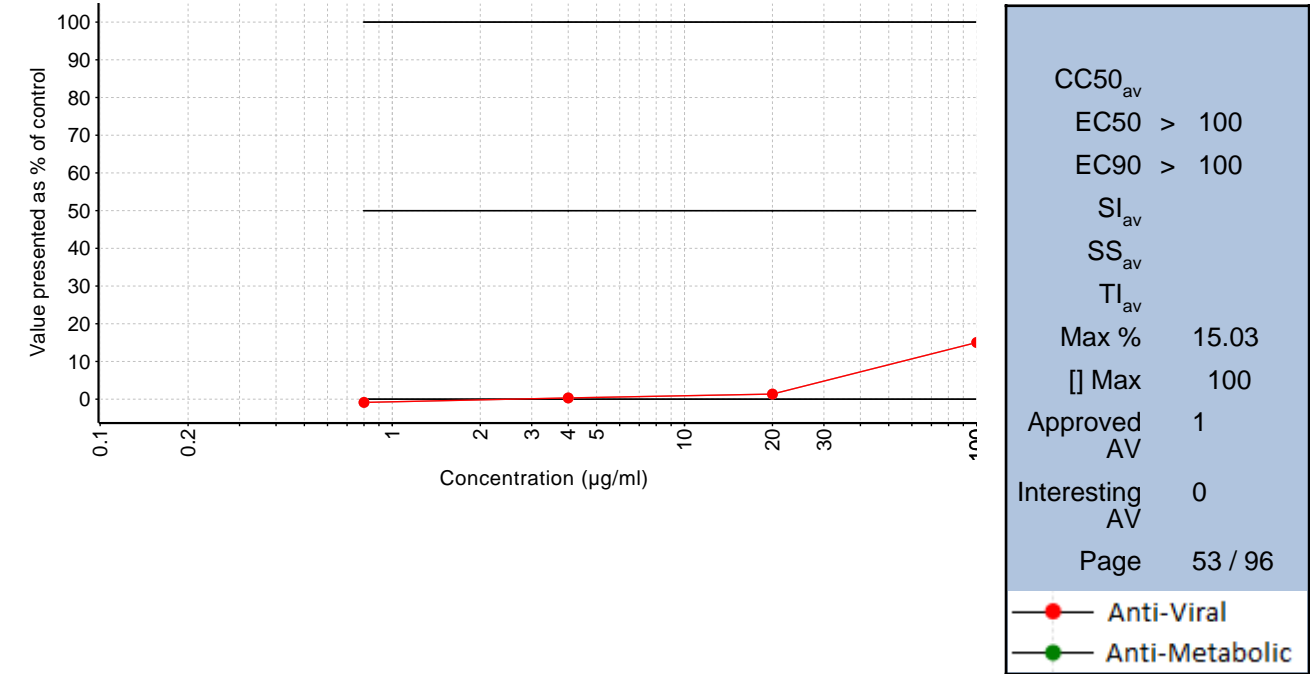

[Export chart data to CSV](#)

| Summary values |      |       |       |
|----------------|------|-------|-------|
| Statistic      | CC50 | EC50  | EC90  |
| Median         |      | > 100 | > 100 |
| Med.Abs.Dev.   |      |       |       |
| Mean           |      | > 100 | > 100 |
| Stdev.         |      |       |       |

| Compound       | Virus              |         |             | Cell |         | AV Method  |             | AM Method  |             |
|----------------|--------------------|---------|-------------|------|---------|------------|-------------|------------|-------------|
| Primary code   | Species            | Type    | Strain      | Type | Subtype | Method     | Type        | Method     | Type        |
| BAVAR IE1_0054 | Yellow fever virus | No Type | 17D Stamari | Huh  | 7       | Absorbance | MTS - 498nm | Microscopy | Tox scoring |

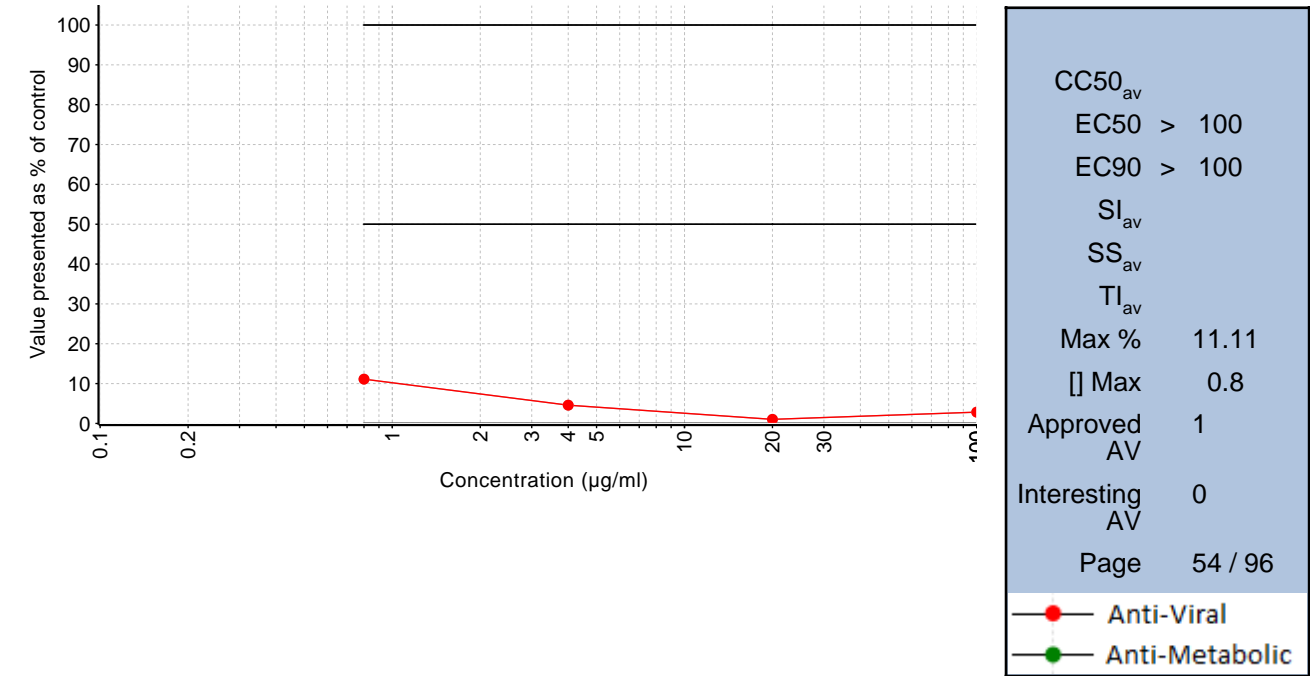

[Export chart data to CSV](#)

| Summary values |      |       |       |
|----------------|------|-------|-------|
| Statistic      | CC50 | EC50  | EC90  |
| Median         |      | > 100 | > 100 |
| Med.Abs.Dev.   |      |       |       |
| Mean           |      | > 100 | > 100 |
| Stdev.         |      |       |       |

| Compound       | Virus              |         |             | Cell |         | AV Method  |             | AM Method  |             |
|----------------|--------------------|---------|-------------|------|---------|------------|-------------|------------|-------------|
| Primary code   | Species            | Type    | Strain      | Type | Subtype | Method     | Type        | Method     | Type        |
| BAVAR IE1_0055 | Yellow fever virus | No Type | 17D Stamari | Huh  | 7       | Absorbance | MTS - 498nm | Microscopy | Tox scoring |

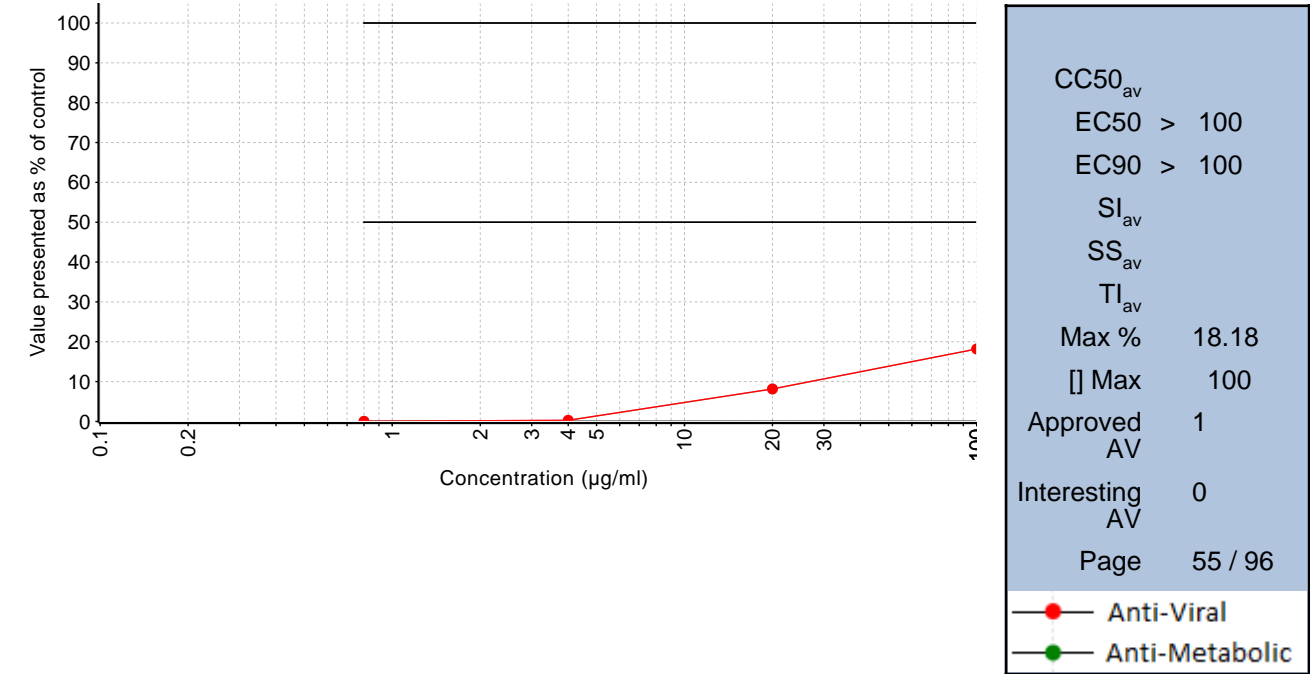

[Export chart data to CSV](#)

| Summary values |      |       |       |
|----------------|------|-------|-------|
| Statistic      | CC50 | EC50  | EC90  |
| Median         |      | > 100 | > 100 |
| Med.Abs.Dev.   |      |       |       |
| Mean           |      | > 100 | > 100 |
| Stdev.         |      |       |       |



| Compound       | Virus              |         |             | Cell |         | AV Method  |             | AM Method  |             |
|----------------|--------------------|---------|-------------|------|---------|------------|-------------|------------|-------------|
| Primary code   | Species            | Type    | Strain      | Type | Subtype | Method     | Type        | Method     | Type        |
| BAVAR IE1_0056 | Yellow fever virus | No Type | 17D Stamari | Huh  | 7       | Absorbance | MTS - 498nm | Microscopy | Tox scoring |

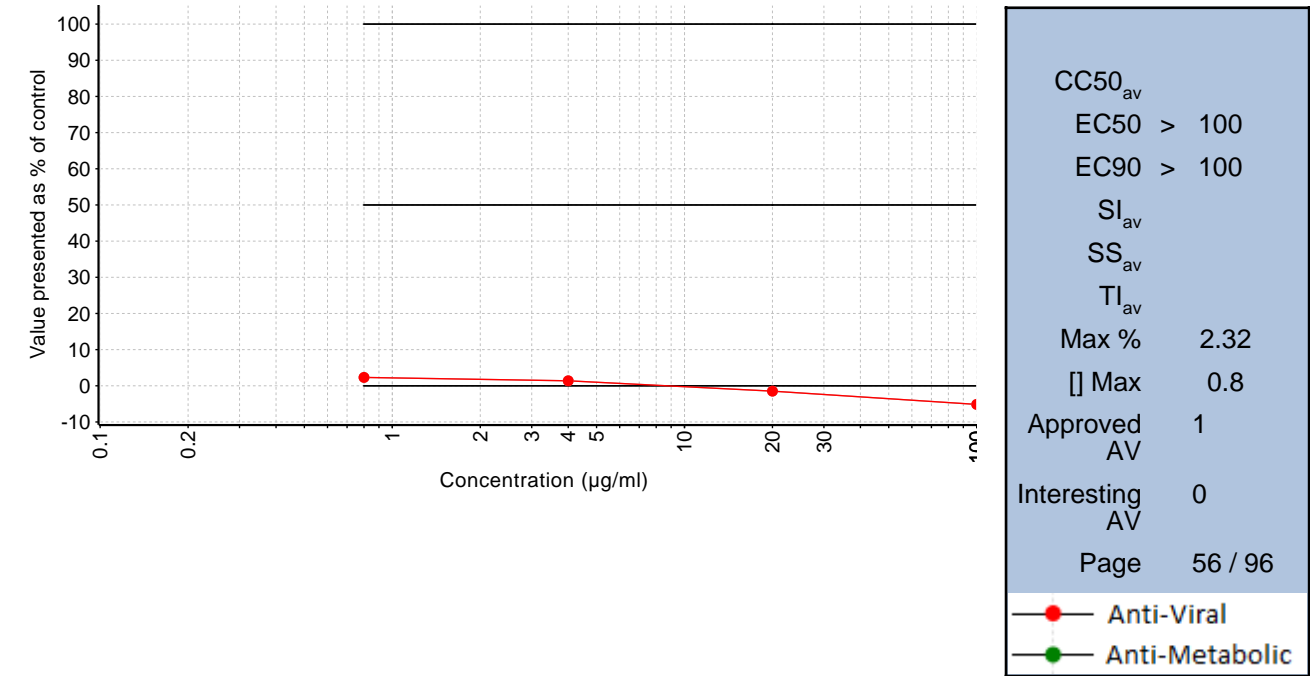

[Export chart data to CSV](#)

| Summary values |      |       |       |
|----------------|------|-------|-------|
| Statistic      | CC50 | EC50  | EC90  |
| Median         |      | > 100 | > 100 |
| Med.Abs.Dev.   |      |       |       |
| Mean           |      | > 100 | > 100 |
| Stdev.         |      |       |       |

| Compound       | Virus              |         |             | Cell |         | AV Method  |             | AM Method  |             |
|----------------|--------------------|---------|-------------|------|---------|------------|-------------|------------|-------------|
| Primary code   | Species            | Type    | Strain      | Type | Subtype | Method     | Type        | Method     | Type        |
| BAVAR IE1_0057 | Yellow fever virus | No Type | 17D Stamari | Huh  | 7       | Absorbance | MTS - 498nm | Microscopy | Tox scoring |

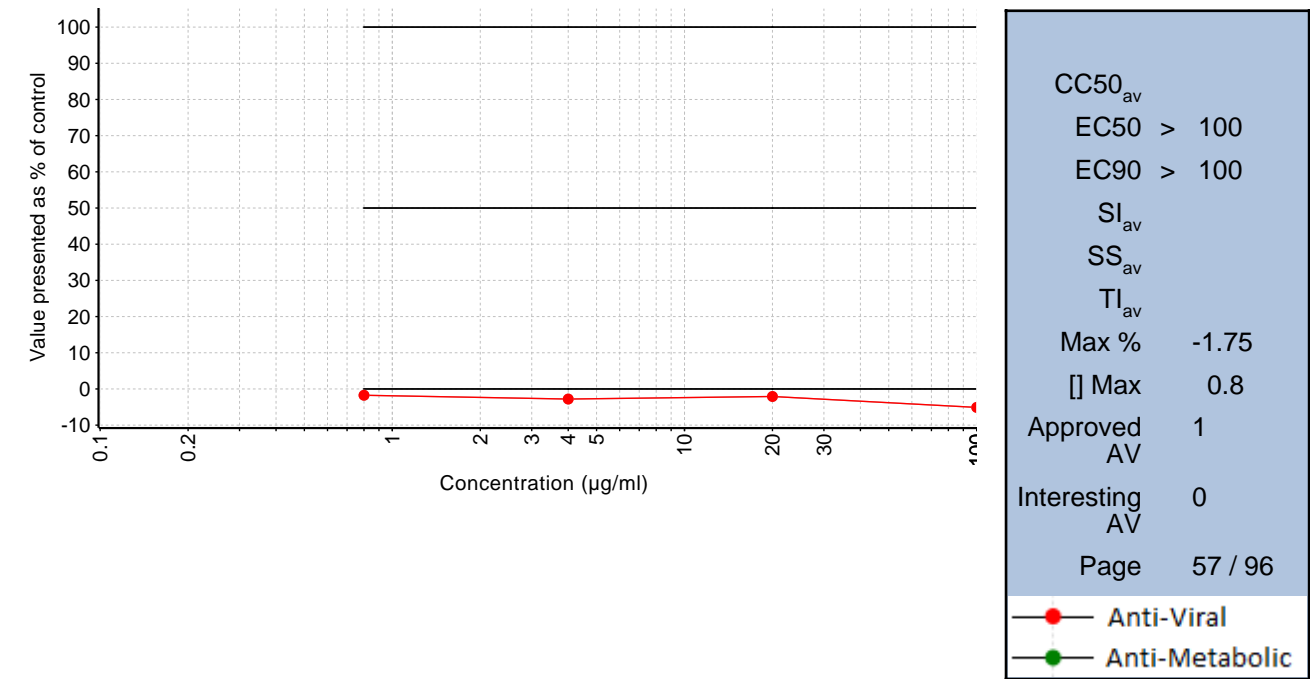

[Export chart data to CSV](#)

| Summary values |      |       |       |
|----------------|------|-------|-------|
| Statistic      | CC50 | EC50  | EC90  |
| Median         |      | > 100 | > 100 |
| Med.Abs.Dev.   |      |       |       |
| Mean           |      | > 100 | > 100 |
| Stdev.         |      |       |       |

| Compound       | Virus              |         |             | Cell |         | AV Method  |             | AM Method  |             |
|----------------|--------------------|---------|-------------|------|---------|------------|-------------|------------|-------------|
| Primary code   | Species            | Type    | Strain      | Type | Subtype | Method     | Type        | Method     | Type        |
| BAVAR IE1_0058 | Yellow fever virus | No Type | 17D Stamari | Huh  | 7       | Absorbance | MTS - 498nm | Microscopy | Tox scoring |

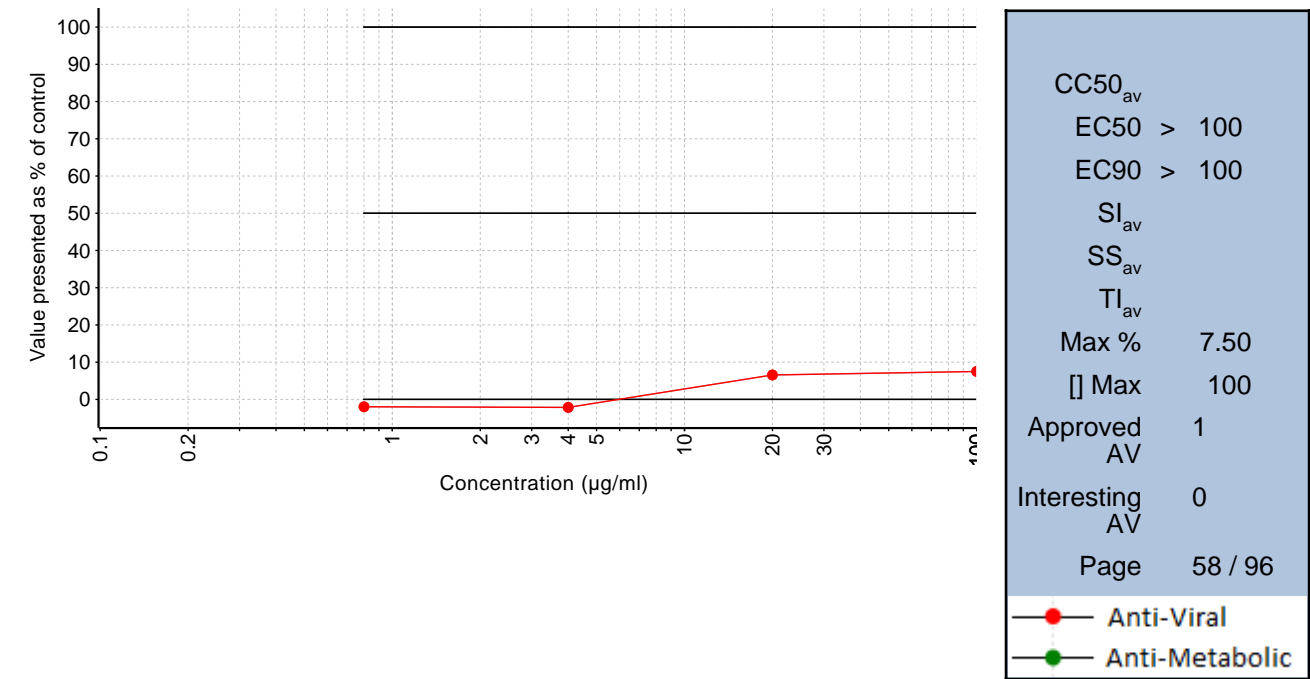

[Export chart data to CSV](#)

| Summary values |      |       |       |
|----------------|------|-------|-------|
| Statistic      | CC50 | EC50  | EC90  |
| Median         |      | > 100 | > 100 |
| Med.Abs.Dev.   |      |       |       |
| Mean           |      | > 100 | > 100 |
| Stdev.         |      |       |       |

| Compound       | Virus              |         |             | Cell |         | AV Method  |             | AM Method  |             |
|----------------|--------------------|---------|-------------|------|---------|------------|-------------|------------|-------------|
| Primary code   | Species            | Type    | Strain      | Type | Subtype | Method     | Type        | Method     | Type        |
| BAVAR IE1_0059 | Yellow fever virus | No Type | 17D Stamari | Huh  | 7       | Absorbance | MTS - 498nm | Microscopy | Tox scoring |

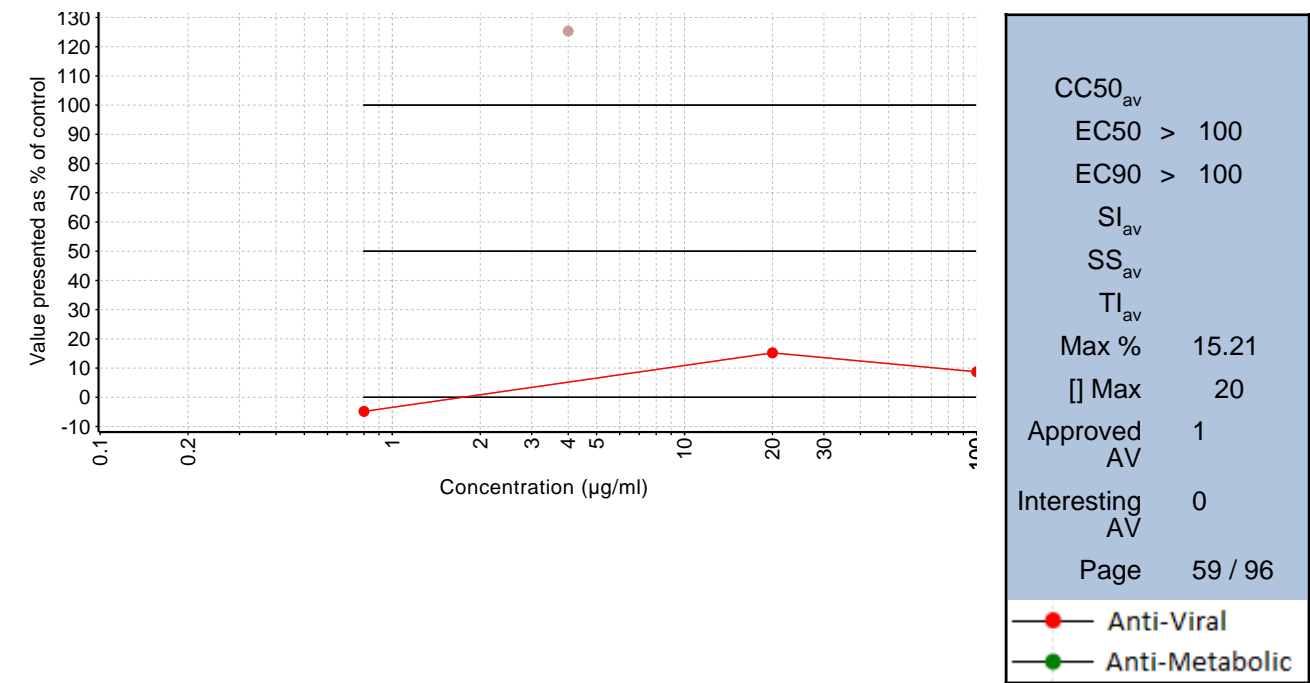

[Export chart data to CSV](#)

| Summary values |      |       |       |
|----------------|------|-------|-------|
| Statistic      | CC50 | EC50  | EC90  |
| Median         |      | > 100 | > 100 |
| Med.Abs.Dev.   |      |       |       |
| Mean           |      | > 100 | > 100 |
| Stdev.         |      |       |       |

| Compound       | Virus              |         |             | Cell |         | AV Method  |             | AM Method  |             |
|----------------|--------------------|---------|-------------|------|---------|------------|-------------|------------|-------------|
| Primary code   | Species            | Type    | Strain      | Type | Subtype | Method     | Type        | Method     | Type        |
| BAVAR IE1_0060 | Yellow fever virus | No Type | 17D Stamari | Huh  | 7       | Absorbance | MTS - 498nm | Microscopy | Tox scoring |

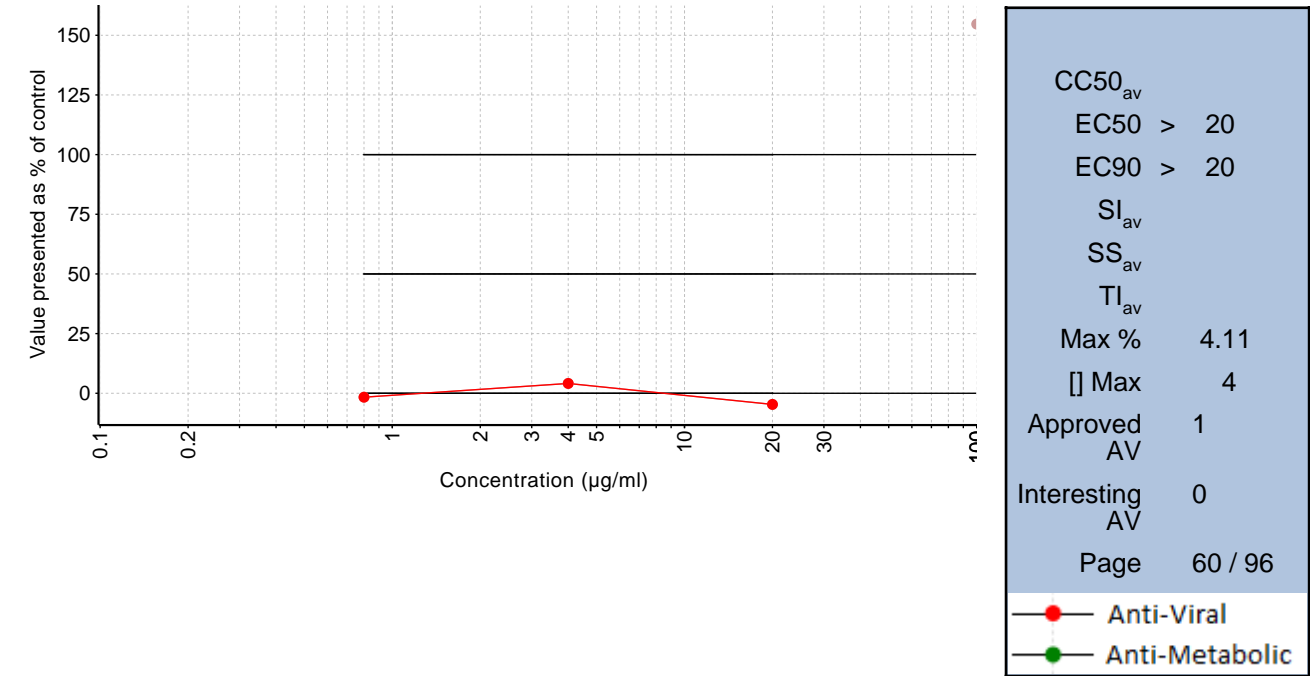

[Export chart data to CSV](#)

| Summary values |      |      |      |
|----------------|------|------|------|
| Statistic      | CC50 | EC50 | EC90 |
| Median         |      | > 20 | > 20 |
| Med.Abs.Dev.   |      |      |      |
| Mean           |      | > 20 | > 20 |
| Stdev.         |      |      |      |

## Repeated experiments with Yellow fever virus (select)

| Compound      | Virus              |         |             | Cell |         | AV Method  |             | AM Method  |             |
|---------------|--------------------|---------|-------------|------|---------|------------|-------------|------------|-------------|
| Primary code  | Species            | Type    | Strain      | Type | Subtype | Method     | Type        | Method     | Type        |
| BAVARIE1_0001 | Yellow fever virus | No Type | 17D Stamari | Huh  | 7       | Absorbance | MTS - 498nm | Microscopy | Tox scoring |

Needs more data.

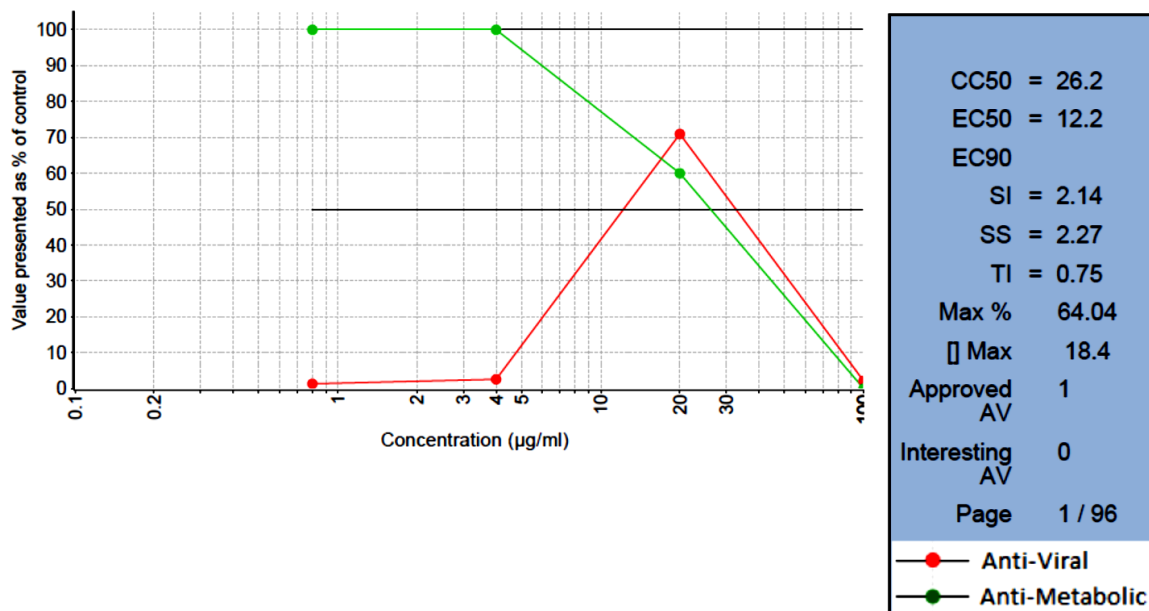

[Export chart data to CSV](#)

| Summary values |        |        |      |
|----------------|--------|--------|------|
| Statistic      | CC50   | EC50   | EC90 |
| Median         | = 29.4 | = 12.2 |      |
| Med.Abs.Dev.   | 3.25   |        |      |
| Mean           | = 29.4 | = 12.2 |      |
| Stdev.         | 4.59   |        |      |

| Compound       | Virus              |         |               | Cell |         | AV Method  |             | AM Method  |             |
|----------------|--------------------|---------|---------------|------|---------|------------|-------------|------------|-------------|
| Primary code   | Species            | Type    | Strain        | Type | Subtype | Method     | Type        | Method     | Type        |
| BAVAR IE1_0111 | Yellow fever virus | No Type | 17D Stamari I | Huh  | 7       | Absorbance | MTS - 498nm | Microscopy | Tox scoring |

Needs more data.

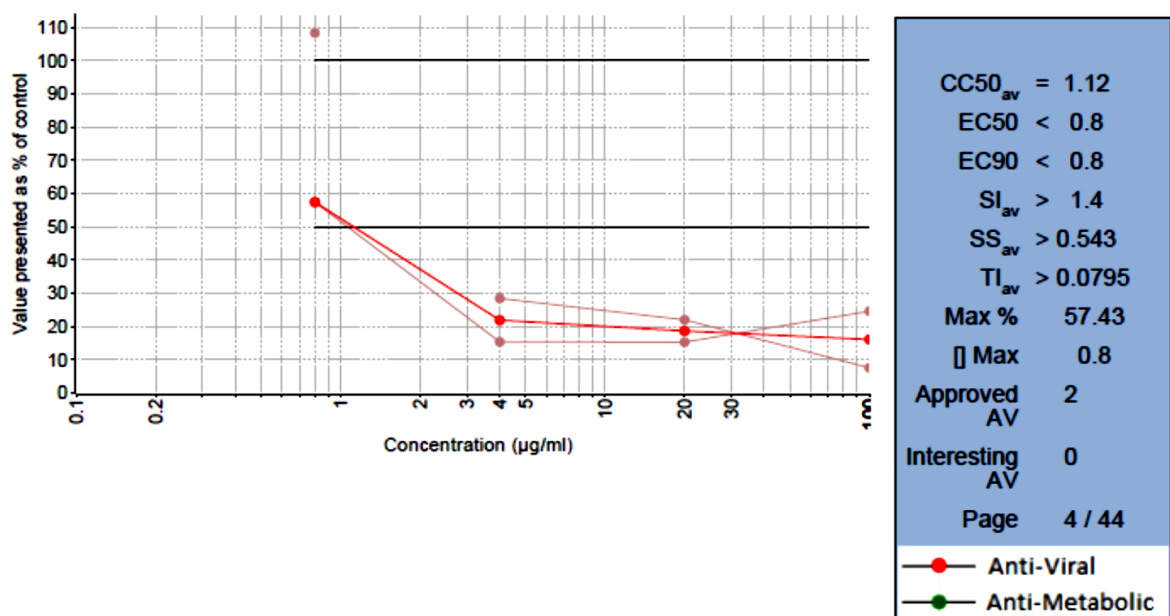

[Export chart data to CSV](#)

| Summary values |        |       |       |
|----------------|--------|-------|-------|
| Statistic      | CC50   | EC50  | EC90  |
| Median         | = 1.06 | < 0.8 | < 0.8 |
| Med.Abs.Dev.   |        |       |       |
| Mean           | = 1.06 | < 0.8 | < 0.8 |
| Stdev.         |        |       |       |

| Compound       | Virus              |         |             | Cell |         | AV Method  |             | AM Method  |             |
|----------------|--------------------|---------|-------------|------|---------|------------|-------------|------------|-------------|
| Primary code   | Species            | Type    | Strain      | Type | Subtype | Method     | Type        | Method     | Type        |
| BAVAR IE1_0013 | Yellow fever virus | No Type | 17D Stamari | Huh  | 7       | Absorbance | MTS - 498nm | Microscopy | Tox scoring |

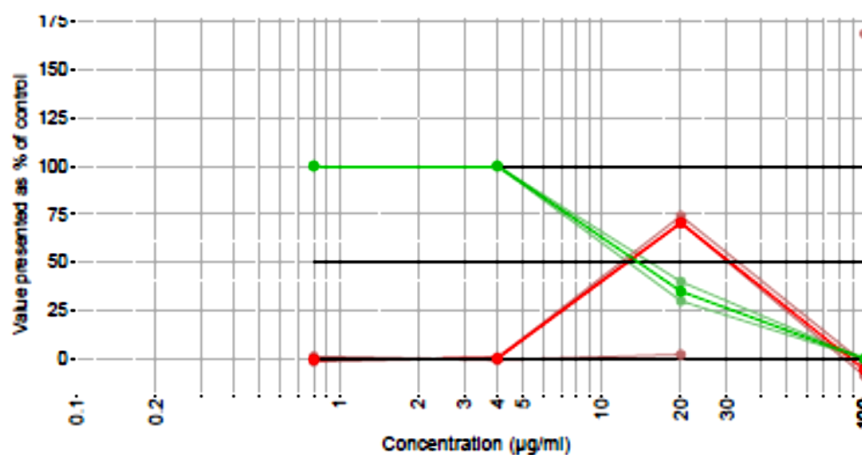

|                |          |
|----------------|----------|
| CC50           | = 13.8   |
| EC50           | = 12.5   |
| EC90           |          |
| SI             | = 1.1    |
| SS             | = 0.358  |
| TI             | = 0.0152 |
| Max %          | 52.05    |
| □ Max          | 15.8     |
| Approved AV    | 3        |
| Interesting AV | 0        |
| Page           | 3 / 24   |

● Anti-Viral  
● Anti-Metabolic

[Export chart data to CSV](#)

| Summary values |        |        |      |
|----------------|--------|--------|------|
| Statistic      | CC50   | EC50   | EC90 |
| Median         | = 22.8 | = 12.1 | > 20 |
| Med.Abs.Dev.   | 8.85   | 0.312  |      |
| Mean           | = 22.9 | = 12.1 | > 20 |
| Stdev.         | 10.4   | 0.441  |      |



| Compound      | Virus              |         |             | Cell |         | AV Method  |             | AM Method  |             |
|---------------|--------------------|---------|-------------|------|---------|------------|-------------|------------|-------------|
| Primary code  | Species            | Type    | Strain      | Type | Subtype | Method     | Type        | Method     | Type        |
| BAVARIE1_0118 | Yellow fever virus | No Type | 17D Stamari | Huh  | 7       | Absorbance | MTS - 498nm | Microscopy | Tox scoring |

Needs more data.

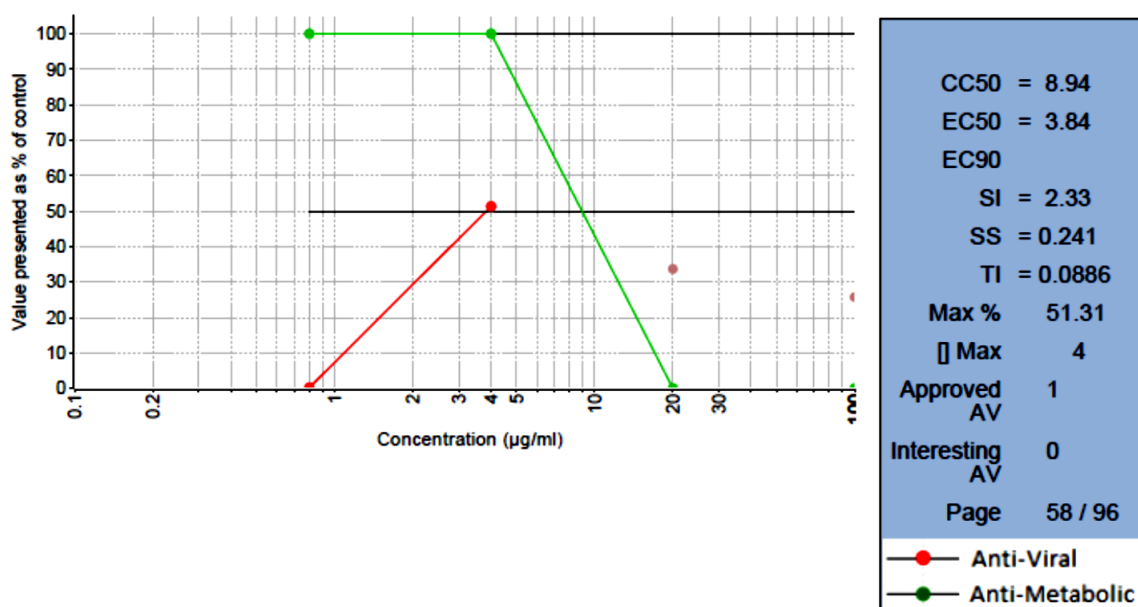

[Export chart data to CSV](#)

| Summary values |        |        |      |
|----------------|--------|--------|------|
| Statistic      | CC50   | EC50   | EC90 |
| Median         | = 8.94 | = 3.84 | > 4  |
| Med.Abs.Dev.   |        |        |      |
| Mean           | = 8.94 | = 3.84 | > 4  |
| Stdev.         |        |        |      |

| Compound       | Virus              |         |             | Cell |         | AV Method  |             | AM Method  |             |
|----------------|--------------------|---------|-------------|------|---------|------------|-------------|------------|-------------|
| Primary code   | Species            | Type    | Strain      | Type | Subtype | Method     | Type        | Method     | Type        |
| BAVAR IE1_0029 | Yellow fever virus | No Type | 17D Stamari | Huh  | 7       | Absorbance | MTS - 498nm | Microscopy | Tox scoring |

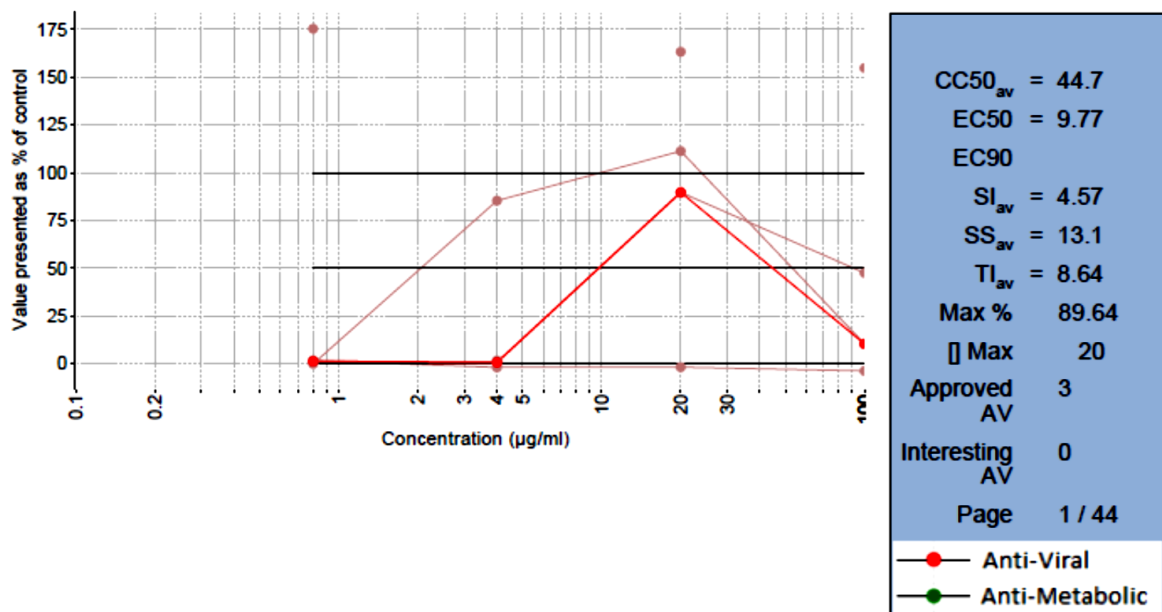

[Export chart data to CSV](#)

| Summary values |        |        |        |
|----------------|--------|--------|--------|
| Statistic      | CC50   | EC50   | EC90   |
| Median         | = 71.8 | = 5.92 | = 5.36 |
| Med.Abs.Dev.   | 18.8   | 3.86   |        |
| Mean           | = 71.8 | = 5.92 | = 5.36 |
| Stdev.         | 26.5   | 5.45   |        |

| Compound       | Virus              |         |             | Cell |         | AV Method  |             | AM Method  |             |
|----------------|--------------------|---------|-------------|------|---------|------------|-------------|------------|-------------|
| Primary code   | Species            | Type    | Strain      | Type | Subtype | Method     | Type        | Method     | Type        |
| BAVAR IE1_0030 | Yellow fever virus | No Type | 17D Stamari | Huh  | 7       | Absorbance | MTS - 498nm | Microscopy | Tox scoring |

Needs more data.

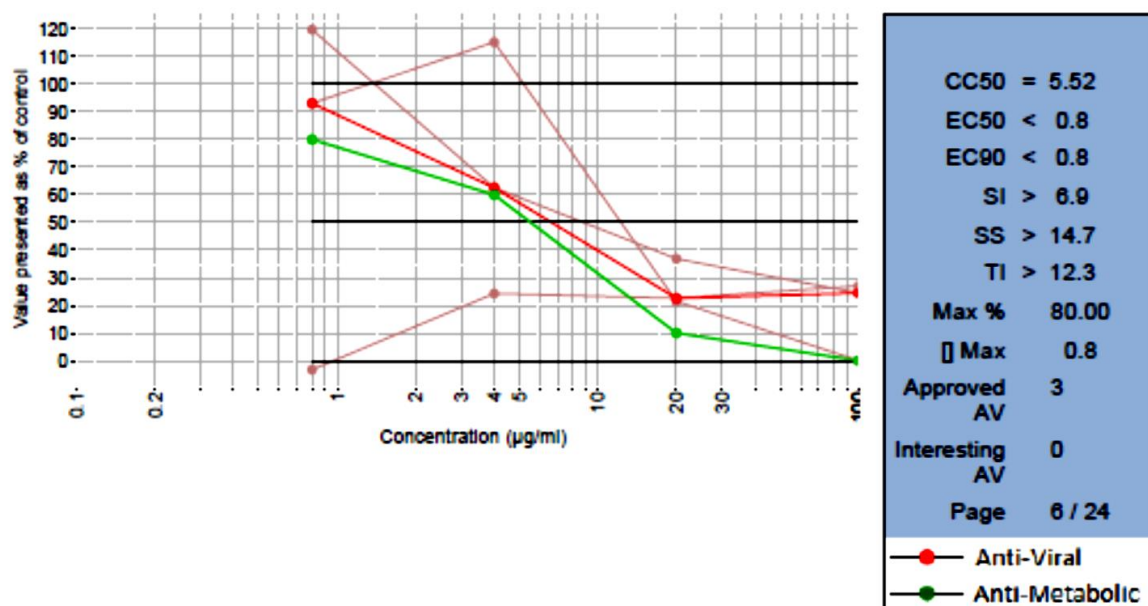

[Export chart data to CSV](#)

| Summary values |        |      |      |
|----------------|--------|------|------|
| Statistic      | CC50   | EC50 | EC90 |
| Median         | = 8.79 |      |      |
| Med.Abs.Dev.   | 3.27   |      |      |
| Mean           | = 8.86 |      |      |
| Stdev.         | 3.37   |      |      |

| Compound       | Virus              |         |             | Cell |         | AV Method  |             | AM Method  |             |
|----------------|--------------------|---------|-------------|------|---------|------------|-------------|------------|-------------|
| Primary code   | Species            | Type    | Strain      | Type | Subtype | Method     | Type        | Method     | Type        |
| BAVAR IE1_0030 | Yellow fever virus | No Type | 17D Stamari | Huh  | 7       | Absorbance | MTS - 498nm | Microscopy | Tox scoring |

variation is linked to adverse effect of compound on cells

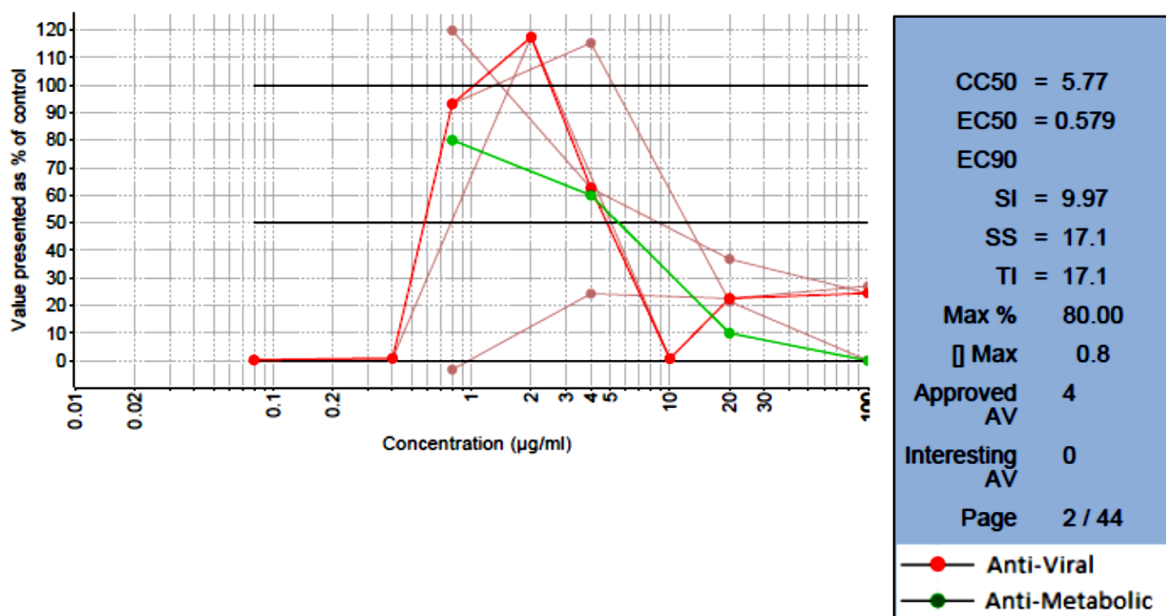

[Export chart data to CSV](#)

| Summary values |        |        |        |
|----------------|--------|--------|--------|
| Statistic      | CC50   | EC50   | EC90   |
| Median         | = 7.15 | =0.789 | = 1.37 |
| Med.Abs.Dev.   | 1.86   |        |        |
| Mean           | = 7.91 | =0.789 | = 1.37 |
| Stdev.         | 3.34   |        |        |

| Compound       | Virus              |         |             | Cell |         | AV Method  |             | AM Method  |             |
|----------------|--------------------|---------|-------------|------|---------|------------|-------------|------------|-------------|
| Primary code   | Species            | Type    | Strain      | Type | Subtype | Method     | Type        | Method     | Type        |
| BAVAR IE1_0048 | Yellow fever virus | No Type | 17D Stamari | Huh  | 7       | Absorbance | MTS - 498nm | Microscopy | Tox scoring |

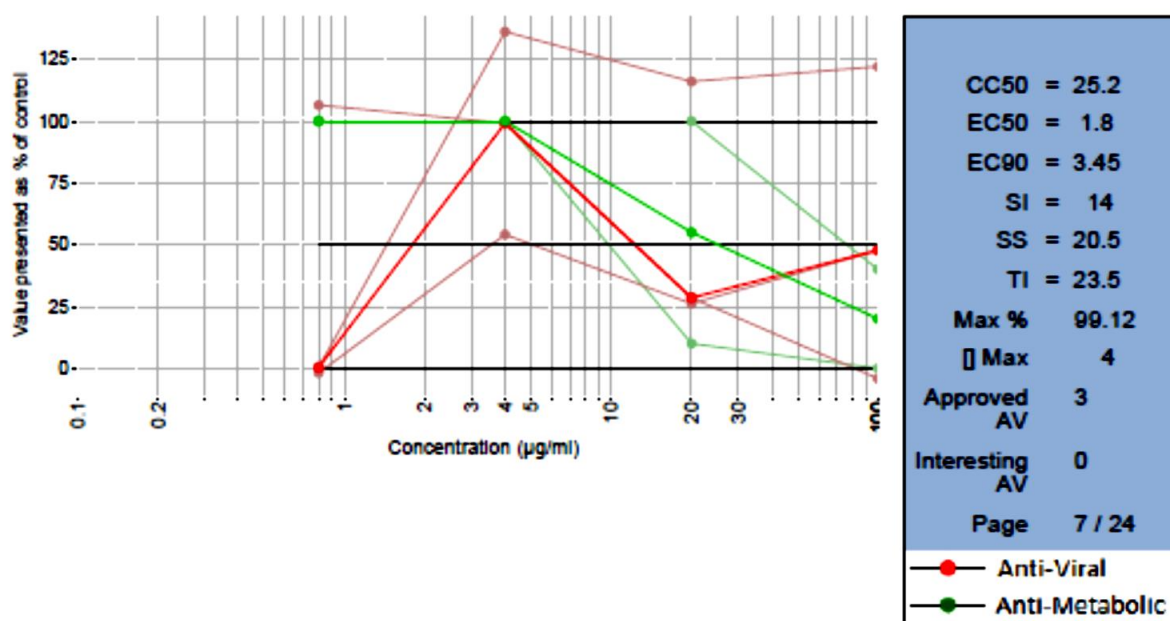

[Export chart data to CSV](#)

| Summary values |        |       |        |
|----------------|--------|-------|--------|
| Statistic      | CC50   | EC50  | EC90   |
| Median         | = 11   | = 2.5 | = 2.31 |
| Med.Abs.Dev.   | 3.6    | 1.06  |        |
| Mean           | = 25.9 | = 2.5 | = 2.31 |
| Stdev.         | 33.8   | 1.49  |        |

| Compound       | Virus              |         |             | Cell |         | AV Method  |             | AM Method  |             |
|----------------|--------------------|---------|-------------|------|---------|------------|-------------|------------|-------------|
| Primary code   | Species            | Type    | Strain      | Type | Subtype | Method     | Type        | Method     | Type        |
| BAVAR IE1_0104 | Yellow fever virus | No Type | 17D Stamari | Huh  | 7       | Absorbance | MTS - 498nm | Microscopy | Tox scoring |

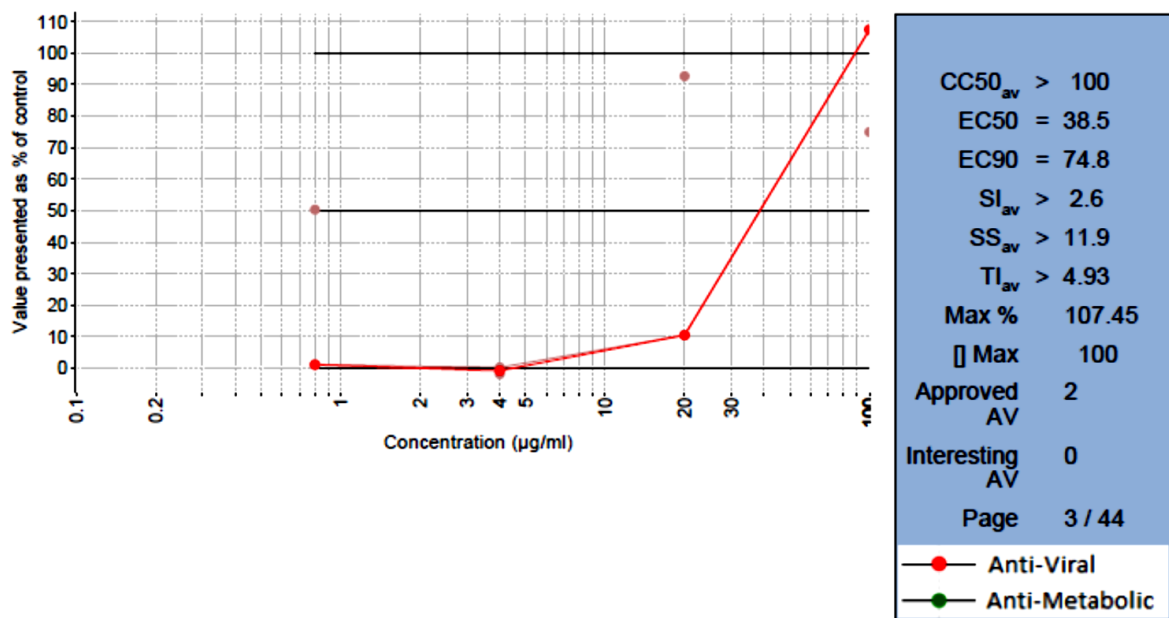

[Export chart data to CSV](#)

| Summary values |       |        |        |
|----------------|-------|--------|--------|
| Statistic      | CC50  | EC50   | EC90   |
| Median         | > 100 | = 38.5 | = 74.8 |
| Med.Abs.Dev.   |       |        |        |
| Mean           | > 100 | = 38.5 | = 74.8 |
| Stdev.         |       |        |        |
